# Supplementary material for: Prenatal Life is the Predominant Source of Somatic Mosaicism Across Tissues and Aging
Source: Research Square preprint supplement (doi:10.21203/rs.3.rs-8663812/v1), 2026-02-04
Supplement: Supplementary file 2 [file 17eb2f813f476a0346364e95.xlsx]

## Sheet: table S1
cell_type	tissue_type	germ_layer
bladder_cell	Bladder	Endoderm
bladder_urothelial_cell	Bladder	Endoderm
endothelial_cell	Bladder	Mesoderm
leukocyte	Bladder	Mesoderm
B_cell	Fat	Mesoderm
T_cell	Fat	Mesoderm
endothelial_cell	Fat	Mesoderm
epithelial_cell	Fat	Endoderm
erythroblast	Fat	Mesoderm
lymphocyte	Fat	Mesoderm
mesenchymal_stem_cell_of_adipose	Fat	Mesoderm
myeloid_cell	Fat	Mesoderm
cardiac_neuron	Heart_and_Aorta	Ectoderm
cardiomyocyte	Heart_and_Aorta	Mesoderm
endocardial_cell	Heart_and_Aorta	Mesoderm
endothelial_cell_of_coronary_artery	Heart_and_Aorta	Mesoderm
erythrocyte	Heart_and_Aorta	Mesoderm
fibroblast_of_cardiac_tissue	Heart_and_Aorta	Mesoderm
leukocyte	Heart_and_Aorta	Mesoderm
mast_cell	Heart_and_Aorta	Mesoderm
smooth_muscle_cell	Heart_and_Aorta	Mesoderm
B_cell	Kidney	Mesoderm
NK_cell	Kidney	Mesoderm
T_cell	Kidney	Mesoderm
brush_cell	Kidney	Mesoderm
epithelial_cell_of_proximal_tubule	Kidney	Mesoderm
fenestrated_cell	Kidney	Mesoderm
fibroblast	Kidney	Mesoderm
kidney_capillary_endothelial_cell	Kidney	Mesoderm
kidney_collecting_duct_epithelial_cell	Kidney	Mesoderm
kidney_collecting_duct_principal_cell	Kidney	Mesoderm
kidney_cortex_artery_cell	Kidney	Mesoderm
kidney_distal_convoluted_tubule_epithelial_cell	Kidney	Mesoderm
kidney_loop_of_Henle_ascending_limb_epithelial_cell	Kidney	Mesoderm
kidney_loop_of_Henle_thick_ascending_limb_epithelial_cell	Kidney	Mesoderm
kidney_mesangial_cell	Kidney	Mesoderm
kidney_proximal_convoluted_tubule_epithelial_cell	Kidney	Mesoderm
kidney_proximal_straight_tubule_epithelial_cell	Kidney	Mesoderm
lymphocyte	Kidney	Mesoderm
macrophage	Kidney	Mesoderm
plasma_cell	Kidney	Mesoderm
podocyte	Kidney	Mesoderm
enterocyte_of_epithelium_of_large_intestine	Large_Intestine	Endoderm
epithelial_cell_of_large_intestine	Large_Intestine	Endoderm
hematopoietic_stem_cell	Large_Intestine	Mesoderm
intestinal_crypt_stem_cell	Large_Intestine	Mesoderm
large_intestine_goblet_cell	Large_Intestine	Endoderm
B_cell	Limb_Muscle	Mesoderm
Schwann_cell	Limb_Muscle	Ectoderm
T_cell	Limb_Muscle	Mesoderm
endothelial_cell	Limb_Muscle	Mesoderm
macrophage	Limb_Muscle	Mesoderm
mesenchymal_stem_cell	Limb_Muscle	Mesoderm
skeletal_muscle_cell	Limb_Muscle	Mesoderm
skeletal_muscle_satellite_cell	Limb_Muscle	Mesoderm
smooth_muscle_cell	Limb_Muscle	Mesoderm
B_cell	Liver	Mesoderm
Kupffer_cell	Liver	Mesoderm
NK_cell	Liver	Mesoderm
endothelial_cell_of_hepatic_sinusoid	Liver	Mesoderm
hepatic_stellate_cell	Liver	Mesoderm
hepatocyte	Liver	Endoderm
myeloid_leukocyte	Liver	Mesoderm
plasmacytoid_dendritic_cell	Liver	Mesoderm
B_cell	Lung	Mesoderm
CD4-positive	Lung	Mesoderm
CD8-positive	Lung	Mesoderm
NK_cell	Lung	Mesoderm
T_cell	Lung	Mesoderm
_alpha-beta_T_cell	Lung	Mesoderm
adventitial_cell	Lung	Mesoderm
alveolar_macrophage	Lung	Mesoderm
basophil	Lung	Mesoderm
bronchial_smooth_muscle_cell	Lung	Mesoderm
ciliated_columnar_cell_of_tracheobronchial_tree	Lung	Endoderm
classical_monocyte	Lung	Mesoderm
dendritic_cell	Lung	Mesoderm
endothelial_cell_of_lymphatic_vessel	Lung	Mesoderm
fibroblast_of_lung	Lung	Mesoderm
intermediate_monocyte	Lung	Mesoderm
lung_macrophage	Lung	Mesoderm
mature_NK_T_cell	Lung	Mesoderm
myeloid_dendritic_cell	Lung	Mesoderm
neutrophil	Lung	Mesoderm
non-classical_monocyte	Lung	Mesoderm
pericyte_cell	Lung	Mesoderm
plasma_cell	Lung	Mesoderm
plasmacytoid_dendritic_cell	Lung	Mesoderm
pulmonary_interstitial_fibroblast	Lung	Mesoderm
regulatory_T_cell	Lung	Mesoderm
smooth_muscle_cell_of_the_pulmonary_artery	Lung	Mesoderm
type_II_pneumocyte	Lung	Endoderm
vein_endothelial_cell	Lung	Mesoderm
B_cell	Mammary_Gland	Mesoderm
T_cell	Mammary_Gland	Mesoderm
basal_cell	Mammary_Gland	Ectoderm
endothelial_cell	Mammary_Gland	Mesoderm
luminal_epithelial_cell_of_mammary_gland	Mammary_Gland	Ectoderm
macrophage	Mammary_Gland	Mesoderm
stromal_cell	Mammary_Gland	Mesoderm
NK_cell	Marrow	Mesoderm
basophil	Marrow	Mesoderm
erythroblast	Marrow	Mesoderm
erythroid_progenitor	Marrow	Mesoderm
granulocyte	Marrow	Mesoderm
granulocytopoietic_cell	Marrow	Mesoderm
hematopoietic_precursor_cell	Marrow	Mesoderm
immature_B_cell	Marrow	Mesoderm
late_pro-B_cell	Marrow	Mesoderm
macrophage	Marrow	Mesoderm
megakaryocyte-erythroid_progenitor_cell	Marrow	Mesoderm
monocyte	Marrow	Mesoderm
naive_B_cell	Marrow	Mesoderm
naive_T_cell	Marrow	Mesoderm
plasma_cell	Marrow	Mesoderm
precursor_B_cell	Marrow	Mesoderm
proerythroblast	Marrow	Mesoderm
promonocyte	Marrow	Mesoderm
endothelial_cell	Pancreas	Mesoderm
leukocyte	Pancreas	Mesoderm
pancreatic_A_cell	Pancreas	Endoderm
pancreatic_B_cell	Pancreas	Endoderm
pancreatic_D_cell	Pancreas	Endoderm
pancreatic_PP_cell	Pancreas	Endoderm
pancreatic_acinar_cell	Pancreas	Endoderm
pancreatic_ductal_cel	Pancreas	Endoderm
pancreatic_stellate_cell	Pancreas	Endoderm
T_cell	Skin	Mesoderm
basal_cell_of_epidermis	Skin	Ectoderm
epidermal_cell	Skin	Ectoderm
keratinocyte_stem_cell	Skin	Ectoderm
stem_cell_of_epidermis	Skin	Ectoderm
B_cell	Spleen	Mesoderm
NK_cell	Spleen	Mesoderm
T_cell	Spleen	Mesoderm
erythroblast	Spleen	Mesoderm
granulocyte	Spleen	Mesoderm
immature_NKT_cell	Spleen	Mesoderm
macrophage	Spleen	Mesoderm
macrophage_dendritic_cell_progenitor	Spleen	Mesoderm
mature_NK_T_cell	Spleen	Mesoderm
megakaryocyte-erythroid_progenitor_cell	Spleen	Mesoderm
plasma_cell	Spleen	Mesoderm
proerythroblast	Spleen	Mesoderm
DN3_thymocyte	Thymus	Mesoderm
DN4_thymocyte	Thymus	Mesoderm
double_negative_T_cell	Thymus	Mesoderm
immature_T_cell	Thymus	Mesoderm
professional_antigen_presenting_cell	Thymus	Mesoderm
thymocyte	Thymus	Mesoderm
Langerhans_cell	Tongue	Mesoderm
basal_cell_of_epidermis	Tongue	Ectoderm
keratinocyte	Tongue	Ectoderm

## Sheet: table S2
cell_type	donor_tissue	germ_layer
naive_thymus-derived_CD4-positive_alpha-beta_T_cell	Lymph_Node	Mesoderm
B_cell	Lymph_Node	Mesoderm
CD8-positive_alpha-beta_T_cell	Lymph_Node	Mesoderm
CD4-positive_alpha-beta_T_cell	Lymph_Node	Mesoderm
plasma_cell	Lymph_Node	Mesoderm
innate_lymphoid_cell	Lymph_Node	Mesoderm
endothelial_cell	Lymph_Node	Mesoderm
natural_killer_cell	Lymph_Node	Mesoderm
erythrocyte	Lymph_Node	Mesoderm
myeloid_dendritic_cell	Lymph_Node	Mesoderm
plasma_cell	Thymus	Mesoderm
CD4-positive_alpha-beta_T_cell	Thymus	Mesoderm
erythrocyte	Thymus	Mesoderm
CD8-positive_alpha-beta_thymocyte	Thymus	Mesoderm
B_cell	Thymus	Mesoderm
vascular_associated_smooth_muscle_cell	Thymus	Mesoderm
neutrophil	Thymus	Mesoderm
vein_endothelial_cell	Thymus	Mesoderm
neutrophil	Liver	Mesoderm
intrahepatic_cholangiocyte	Liver	Endoderm
endothelial_cell	Liver	Mesoderm
myeloid_cell	Liver	Mesoderm
natural_killer_cell	Liver	Mesoderm
macrophage	Liver	Mesoderm
regular_atrial_cardiac_myocyte	Heart	Mesoderm
erythrocyte	Heart	Mesoderm
smooth_muscle_cell	Heart	Mesoderm
cardiac_endothelial_cell	Heart	Mesoderm
macrophage	Heart	Mesoderm
pericyte	Heart	Mesoderm
mesothelial_cell	Heart	Mesoderm
endothelial_cell_of_artery	Lung	Mesoderm
non-classical_monocyte	Lung	Mesoderm
neutrophil	Lung	Mesoderm
macrophage	Lung	Mesoderm
plasma_cell	Lung	Mesoderm
classical_monocyte	Lung	Mesoderm
respiratory_tract_goblet_cell	Lung	Endoderm
basal_cell	Lung	Endoderm
pulmonary_alveolar_type_2_cell	Lung	Endoderm
mesenchymal_stem_cell	Muscle	Mesoderm
pericyte	Muscle	Mesoderm
skeletal_muscle_satellite_stem_cell	Muscle	Mesoderm
tendon_cell	Muscle	Mesoderm
T_cell	Muscle	Mesoderm
capillary_endothelial_cell	Muscle	Mesoderm
B_cell	Spleen	Mesoderm
CD8-positive_alpha-beta_T_cell	Spleen	Mesoderm
naive_thymus-derived_CD4-positive_alpha-beta_T_cell	Spleen	Mesoderm
classical_monocyte	Spleen	Mesoderm
mature_NK_T_cell	Spleen	Mesoderm
natural_killer_cell	Spleen	Mesoderm
CD4-positive_alpha-beta_T_cell	Spleen	Mesoderm
regulatory_T_cell	Spleen	Mesoderm
plasma_cell	Spleen	Mesoderm
keratocyte	Eye	Ectoderm
fast_muscle_cell	Muscle	Mesoderm
endothelial_cell_of_lymphatic_vessel	Muscle	Mesoderm
slow_muscle_cell	Muscle	Mesoderm
endothelial_cell_of_vascular_tree	Muscle	Mesoderm
smooth_muscle_cell	Muscle	Mesoderm
macrophage	Muscle	Mesoderm
CD8-positive_alpha-beta_T_cell	Bone_Marrow	Mesoderm
CD4-positive_alpha-beta_T_cell	Bone_Marrow	Mesoderm
monocyte	Bone_Marrow	Mesoderm
neutrophil	Bone_Marrow	Mesoderm
B_cell	Bone_Marrow	Mesoderm
erythroid_progenitor_cell	Bone_Marrow	Mesoderm
natural_killer_cell	Bone_Marrow	Mesoderm
macrophage	Bone_Marrow	Mesoderm
plasma_cell	Bone_Marrow	Mesoderm
hematopoietic_stem_cell	Bone_Marrow	Mesoderm
epithelial_cell_of_uterus	Uterus	Mesoderm
fibroblast	Uterus	Mesoderm
endothelial_cell	Uterus	Mesoderm
ciliated_epithelial_cell	Uterus	Mesoderm
epithelial_fate_stem_cell	Uterus	Mesoderm
endothelial_cell_of_lymphatic_vessel	Uterus	Mesoderm
macrophage	Fat	Mesoderm
leukocyte	Fat	Mesoderm
CD8-positive_alpha-beta_T_cell	Fat	Mesoderm
smooth_muscle_cell	Fat	Mesoderm
B_cell	Fat	Mesoderm
activated_CD4-positive_alpha-beta_T_cell	Fat	Mesoderm
CD8-positive_alpha-beta_T_cell	Muscle	Mesoderm
CD4-positive_alpha-beta_T_cell	Muscle	Mesoderm
myeloid_dendritic_cell	Muscle	Mesoderm
mast_cell	Muscle	Mesoderm
plasma_cell	Muscle	Mesoderm
smooth_muscle_cell	Ovary	Mesoderm
endothelial_cell	Ovary	Mesoderm
theca_cell	Ovary	Mesoderm
B_cell	Ovary	Mesoderm
stromal_cell	Ovary	Mesoderm
leukocyte	Ovary	Mesoderm
oocyte	Ovary	Epiblast
fibroblast	Vasculature	Mesoderm
pericyte	Vasculature	Mesoderm
CD4-positive_alpha-beta_T_cell	Vasculature	Mesoderm
endothelial_cell	Vasculature	Mesoderm
smooth_muscle_cell	Vasculature	Mesoderm
natural_killer_cell	Vasculature	Mesoderm
macrophage	Vasculature	Mesoderm
CD8-positive_alpha-beta_T_cell	Vasculature	Mesoderm
capillary_endothelial_cell	Vasculature	Mesoderm
plasma_cell	Vasculature	Mesoderm
B_cell	Vasculature	Mesoderm
mast_cell	Vasculature	Mesoderm
vein_endothelial_cell	Vasculature	Mesoderm
erythrocyte	Vasculature	Mesoderm
endothelial_cell_of_artery	Vasculature	Mesoderm
capillary_endothelial_cell	Lung	Mesoderm
pulmonary_alveolar_type_1_cell	Lung	Endoderm
pericyte	Lung	Mesoderm
alveolar_adventitial_fibroblast	Lung	Mesoderm
lung_multiciliated_epithelial_cell	Lung	Endoderm
club_cell	Lung	Endoderm
vein_endothelial_cell	Lung	Mesoderm
CD8-positive_alpha-beta_T_cell	Lung	Mesoderm
bronchial_smooth_muscle_cell	Lung	Mesoderm
granulocyte	Bone_Marrow	Mesoderm
common_myeloid_progenitor	Bone_Marrow	Mesoderm
epithelial_cell	Ovary	Mesoderm
plasma_cell	Ovary	Mesoderm
fibroblast	Liver	Mesoderm
monocyte	Liver	Mesoderm
myeloid_dendritic_cell	Liver	Mesoderm
erythrocyte	Liver	Mesoderm
T_cell	Liver	Mesoderm
basal_cell	Tongue	Ectoderm/Endoderm
salivary_gland_cell	Tongue	Ectoderm
mural_cell	Tongue	Mesoderm
CD4-positive_alpha-beta_T_cell	Tongue	Mesoderm
fibroblast	Tongue	Mesoderm
fibroblast_of_breast	Mammary	Mesoderm
basal_cell	Mammary	Ectoderm
vascular_associated_smooth_muscle_cell	Mammary	Mesoderm
endothelial_cell	Mammary	Mesoderm
CD8-positive_alpha-beta_T_cell	Mammary	Mesoderm
adventitial_cell	Lung	Mesoderm
mesothelial_cell	Lung	Mesoderm
CD4-positive_alpha-beta_T_cell	Lung	Mesoderm
B_cell	Lung	Mesoderm
stratified_squamous_epithelial_cell	Tongue	Ectoderm/Endoderm
tongue_muscle_cell	Tongue	Mesoderm
endothelial_cell	Tongue	Mesoderm
plasma_cell	Trachea	Mesoderm
macrophage	Trachea	Mesoderm
neutrophil	Trachea	Mesoderm
B_cell	Trachea	Mesoderm
fibroblast	Trachea	Mesoderm
monocyte	Thymus	Mesoderm
macrophage	Thymus	Mesoderm
fast_muscle_cell	Thymus	Mesoderm
capillary_endothelial_cell	Thymus	Mesoderm
natural_killer_cell	Thymus	Mesoderm
endothelial_cell_of_artery	Thymus	Mesoderm
fibroblast	Thymus	Mesoderm
mast_cell	Thymus	Mesoderm
thymocyte	Thymus	Mesoderm
medullary_thymic_epithelial_cell	Thymus	Endoderm
fibroblast	Bladder	Mesoderm
pericyte	Bladder	Mesoderm
myofibroblast_cell	Bladder	Mesoderm
smooth_muscle_cell	Bladder	Mesoderm
monocyte	Bladder	Mesoderm
plasma_cell	Bladder	Mesoderm
macrophage	Bladder	Mesoderm
fibroblast	Fat	Mesoderm
endothelial_cell	Fat	Mesoderm
CD8-positive_alpha-beta_T_cell	Prostate	Mesoderm
luminal_cell_of_prostate_epithelium	Prostate	Endoderm
B_cell	Prostate	Mesoderm
fibroblast	Prostate	Mesoderm
smooth_muscle_cell	Prostate	Mesoderm
basal_cell_of_prostate_epithelium	Prostate	Endoderm
T_cell	Prostate	Mesoderm
acinar_cell	Eye	Ectoderm
adipocyte	Eye	Mesoderm
endothelial_cell	Eye	Mesoderm
conjunctival_epithelial_cell	Eye	Ectoderm
monocyte	Blood	Mesoderm
mature_NK_T_cell	Blood	Mesoderm
platelet	Blood	Mesoderm
plasma_cell	Blood	Mesoderm
CD4-positive_alpha-beta_T_cell	Blood	Mesoderm
CD8-positive_alpha-beta_T_cell	Blood	Mesoderm
neutrophil	Blood	Mesoderm
erythrocyte	Blood	Mesoderm
hematopoietic_stem_cell	Blood	Mesoderm
B_cell	Blood	Mesoderm
natural_killer_cell	Blood	Mesoderm
classical_monocyte	Blood	Mesoderm
duct_epithelial_cell	Salivary_Gland	Ectoderm
vascular_associated_smooth_muscle_cell	Salivary_Gland	Mesoderm
plasma_cell	Salivary_Gland	Mesoderm
adventitial_cell	Salivary_Gland	Mesoderm
fibroblast	Salivary_Gland	Mesoderm
macrophage	Salivary_Gland	Mesoderm
acinar_cell_of_salivary_gland	Salivary_Gland	Ectoderm
basal_cell	Salivary_Gland	Ectoderm
myoepithelial_cell	Salivary_Gland	Ectoderm
CD8-positive_alpha-beta_T_cell	Salivary_Gland	Mesoderm
endothelial_cell	Salivary_Gland	Mesoderm
ionocyte	Salivary_Gland	Ectoderm
tissue-resident_macrophage	Salivary_Gland	Mesoderm
CD4-positive_alpha-beta_T_cell	Salivary_Gland	Mesoderm
salivary_gland_cell	Salivary_Gland	Ectoderm
B_cell	Salivary_Gland	Mesoderm
mature_NK_T_cell	Salivary_Gland	Mesoderm
endothelial_cell_of_lymphatic_vessel	Salivary_Gland	Mesoderm
endothelial_cell_of_artery	Muscle	Mesoderm
myeloid_dendritic_cell	Skin	Mesoderm
CD4-positive_alpha-beta_T_cell	Skin	Mesoderm
macrophage	Skin	Mesoderm
T_cell	Skin	Mesoderm
CD8-positive_alpha-beta_T_cell	Skin	Mesoderm
mast_cell	Skin	Mesoderm
basophil	Skin	Mesoderm
natural_killer_cell	Skin	Mesoderm
sebocyte	Skin	Ectoderm
regulatory_T_cell	Skin	Mesoderm
fibroblast	Skin	Mesoderm
smooth_muscle_cell	Skin	Mesoderm
mature_NK_T_cell	Skin	Mesoderm
endothelial_cell	Skin	Mesoderm
melanocyte	Skin	Ectoderm
epithelial_cell	Skin	Mesoderm
plasma_cell	Tongue	Mesoderm
CD8-positive_alpha-beta_thymocyte	Lymph_Node	Mesoderm
CD4-positive_alpha-beta_thymocyte	Lymph_Node	Mesoderm
regulatory_T_cell	Lymph_Node	Mesoderm
Schwann_cell	Eye	Ectoderm
myeloid_dendritic_cell	Eye	Mesoderm
microglial_cell	Eye	Mesoderm
CD4-positive_alpha-beta_T_cell	Eye	Mesoderm
CD8-positive_alpha-beta_T_cell	Eye	Mesoderm
B_cell	Eye	Mesoderm
eye_photoreceptor_cell	Eye	Ectoderm
T_cell	Eye	Mesoderm
macrophage	Eye	Mesoderm
plasma_cell	Eye	Mesoderm
stromal_cell	Eye	Mesoderm
Langerhans_cell	Skin	Mesoderm
plasma_cell	Skin	Mesoderm
B_cell	Skin	Mesoderm
adventitial_cell	Uterus	Mesoderm
intermediate_monocyte	Lymph_Node	Mesoderm
enterocyte_of_epithelium_of_large_intestine	Large_Intestine	Endoderm
paneth_cell_of_colon	Large_Intestine	Endoderm
intestinal_crypt_stem_cell_of_colon	Large_Intestine	Endoderm
enteroglial_cell	Large_Intestine	Ectoderm
tuft_cell_of_colon	Large_Intestine	Endoderm
fibroblast	Large_Intestine	Mesoderm
colon_endothelial_cell	Large_Intestine	Mesoderm
mast_cell	Lymph_Node	Mesoderm
stromal_cell	Lymph_Node	Mesoderm
monocyte	Lymph_Node	Mesoderm
endothelial_cell_of_lymphatic_vessel	Bladder	Mesoderm
vein_endothelial_cell	Bladder	Mesoderm
endothelial_cell	Bladder	Mesoderm
bladder_urothelial_cell	Bladder	Endoderm
CD8-positive_alpha-beta_T_cell	Liver	Mesoderm
B_cell	Liver	Mesoderm
hepatocyte	Liver	Endoderm
CD4-positive_alpha-beta_T_cell	Liver	Mesoderm
neutrophil	Spleen	Mesoderm
endothelial_cell	Spleen	Mesoderm
intermediate_monocyte	Spleen	Mesoderm
innate_lymphoid_cell	Spleen	Mesoderm
macrophage	Spleen	Mesoderm
basophil	Lung	Mesoderm
enterocyte_of_epithelium_proper_of_small_intestine	Small_Intestine	Endoderm
macrophage	Small_Intestine	Mesoderm
paneth_cell_of_epithelium_of_small_intestine	Small_Intestine	Endoderm
intestinal_crypt_stem_cell_of_small_intestine	Small_Intestine	Endoderm
neutrophil	Bladder	Mesoderm
natural_killer_cell	Bladder	Mesoderm
mast_cell	Bladder	Mesoderm
T_cell	Bladder	Mesoderm
glandular_secretory_epithelial_cell	Ovary	Mesoderm
endothelial_cell	Trachea	Mesoderm
erythrocyte	Bone_Marrow	Mesoderm
Mueller_cell	Eye	Ectoderm
retinal_pigment_epithelial_cell	Eye	Ectoderm
monocyte	Eye	Mesoderm
endothelial_cell_of_lymphatic_vessel	Thymus	Mesoderm
pericyte	Salivary_Gland	Mesoderm
endothelial_cell_of_artery	Salivary_Gland	Mesoderm
T_cell	Fat	Mesoderm
neutrophil	Fat	Mesoderm
mesenchymal_stem_cell_of_adipose_tissue	Fat	Mesoderm
natural_killer_cell	Fat	Mesoderm
CD4-positive_alpha-beta_T_cell	Large_Intestine	Mesoderm
CD8-positive_alpha-beta_T_cell	Large_Intestine	Mesoderm
plasma_cell	Large_Intestine	Mesoderm
colon_macrophage	Large_Intestine	Mesoderm
B_cell	Large_Intestine	Mesoderm
gamma-delta_T_cell	Large_Intestine	Mesoderm
myofibroblast_cell	Large_Intestine	Mesoderm
CD8-positive_alpha-beta_T_cell	Bladder	Mesoderm
CD4-positive_alpha-beta_T_cell	Bladder	Mesoderm
naive_thymus-derived_CD4-positive_alpha-beta_T_cell	Blood	Mesoderm
erythroid_lineage_cell	Eye	Mesoderm
fibroblast	Eye	Mesoderm
activated_CD4-positive_alpha-beta_T_cell	Skin	Mesoderm
mature_NK_T_cell	Lymph_Node	Mesoderm
non-classical_monocyte	Lymph_Node	Mesoderm
classical_monocyte	Lymph_Node	Mesoderm
small_intestine_goblet_cell	Small_Intestine	Endoderm
myeloid_dendritic_cell	Bone_Marrow	Mesoderm
CD4-positive_alpha-beta_T_cell	Fat	Mesoderm
myeloid_dendritic_cell	Fat	Mesoderm
mast_cell	Fat	Mesoderm
plasma_cell	Fat	Mesoderm
neutrophil	Prostate	Mesoderm
endothelial_cell	Prostate	Mesoderm
plasma_cell	Small_Intestine	Mesoderm
CD4-positive_alpha-beta_T_cell	Small_Intestine	Mesoderm
CD8-positive_alpha-beta_T_cell	Small_Intestine	Mesoderm
fibroblast	Small_Intestine	Mesoderm
endothelial_cell_of_arteriole	Small_Intestine	Mesoderm
mast_cell	Small_Intestine	Mesoderm
enteroglial_cell	Small_Intestine	Ectoderm
intestinal_tuft_cell	Small_Intestine	Endoderm
activated_CD4-positive_alpha-beta_T_cell	Small_Intestine	Mesoderm
neutrophil	Tongue	Mesoderm
macrophage	Tongue	Mesoderm
retinal_blood_vessel_endothelial_cell	Eye	Mesoderm
corneal_epithelial_cell	Eye	Ectoderm
retinal_bipolar_neuron	Eye	Ectoderm
serous_cell_of_epithelium_of_bronchus	Lung	Endoderm
neutrophil	Vasculature	Mesoderm
pericyte	Uterus	Mesoderm
vascular_associated_smooth_muscle_cell	Uterus	Mesoderm
granulocyte	Trachea	Mesoderm
pulmonary_ionocyte	Lung	Endoderm
myeloid_dendritic_cell	Lung	Mesoderm
intermediate_monocyte	Lung	Mesoderm
natural_killer_cell	Lung	Mesoderm
natural_killer_cell	Salivary_Gland	Mesoderm
mast_cell	Salivary_Gland	Mesoderm
monocyte	Salivary_Gland	Mesoderm
radial_glial_cell	Eye	Ectoderm
plasmacytoid_dendritic_cell	Spleen	Mesoderm
myeloid_dendritic_cell	Spleen	Mesoderm
erythrocyte	Spleen	Mesoderm
mast_cell	Eye	Mesoderm
neutrophil	Small_Intestine	Mesoderm
enteroendocrine_cell_of_small_intestine	Small_Intestine	Endoderm
pericyte	Small_Intestine	Mesoderm
B_cell	Small_Intestine	Mesoderm
endothelial_cell_of_lymphatic_vessel	Small_Intestine	Mesoderm
tracheal_goblet_cell	Trachea	Endoderm
multiciliated_columnar_cell_of_tracheobronchial_tree	Trachea	Endoderm
basal_cell	Trachea	Endoderm
mucus_secreting_cell	Trachea	Endoderm
ionocyte	Trachea	Endoderm
myofibroblast_cell	Fat	Mesoderm
stromal_cell	Skin	Mesoderm
blood_vessel_smooth_muscle_cell	Ovary	Mesoderm
myeloid_dendritic_cell	Blood	Mesoderm
mature_NK_T_cell	Muscle	Mesoderm
B_cell	Muscle	Mesoderm
mesenchymal_cell	Muscle	Mesoderm
CD4-positive_alpha-beta_T_cell	Stomach	Mesoderm
B_cell	Stomach	Mesoderm
plasma_cell	Stomach	Mesoderm
fibroblast	Stomach	Mesoderm
mononuclear_phagocyte	Stomach	Mesoderm
mast_cell	Stomach	Mesoderm
macrophage	Stomach	Mesoderm
natural_killer_cell	Stomach	Mesoderm
CD8-positive_alpha-beta_T_cell	Stomach	Mesoderm
T_cell	Stomach	Mesoderm
regulatory_T_cell	Stomach	Mesoderm
epithelial_cell	Stomach	Mesoderm
monocyte	Stomach	Mesoderm
tissue-resident_macrophage	Stomach	Mesoderm
endothelial_cell_of_venule	Small_Intestine	Mesoderm
mesothelial_cell	Muscle	Mesoderm
large_intestine_goblet_cell	Large_Intestine	Endoderm
myeloid_dendritic_cell	Large_Intestine	Mesoderm
monocyte	Large_Intestine	Mesoderm
mast_cell	Large_Intestine	Mesoderm
neutrophil	Large_Intestine	Mesoderm
enterochromaffin-like_cell	Large_Intestine	Endoderm
T_follicular_helper_cell	Thymus	Mesoderm
innate_lymphoid_cell	Thymus	Mesoderm
CD8-positive_alpha-beta_T_cell	Thymus	Mesoderm
B_cell	Bladder	Mesoderm
type_L_enteroendocrine_cell	Large_Intestine	Endoderm
kidney_epithelial_cell	Kidney	Mesoderm
B_cell	Kidney	Mesoderm
CD8-positive_alpha-beta_T_cell	Kidney	Mesoderm
natural_killer_cell	Kidney	Mesoderm
CD4-positive_alpha-beta_T_cell	Kidney	Mesoderm
macrophage	Kidney	Mesoderm
plasma_cell	Liver	Mesoderm
mature_NK_T_cell	Liver	Mesoderm
endothelial_cell_of_lymphatic_vessel	Lung	Mesoderm
BEST4+_enterocyte	Small_Intestine	Endoderm
myofibroblast_cell	Small_Intestine	Mesoderm
taste_receptor_cell	Tongue	Ectoderm/Endoderm
neutrophil	Salivary_Gland	Mesoderm
neutrophil	Heart	Mesoderm
myeloid_dendritic_cell	Vasculature	Mesoderm
monocyte	Spleen	Mesoderm
T_cell	Mammary	Mesoderm
CD4-positive_alpha-beta_T_cell	Mammary	Mesoderm
B_cell	Mammary	Mesoderm
macrophage	Mammary	Mesoderm
fibroblast_of_cardiac_tissue	Heart	Mesoderm
enterocyte_of_epithelium_proper_of_ileum	Small_Intestine	Endoderm
T_cell	Vasculature	Mesoderm
endothelial_cell_of_lymphatic_vessel	Vasculature	Mesoderm
macrophage	Lymph_Node	Mesoderm
enterocyte_of_epithelium_proper_of_duodenum	Small_Intestine	Endoderm
natural_killer_cell	Small_Intestine	Mesoderm
activated_CD8-positive_alpha-beta_T_cell	Small_Intestine	Mesoderm
myeloid_dendritic_cell	Salivary_Gland	Mesoderm
fibroblast	Bone_Marrow	Mesoderm
endothelial_cell	Bone_Marrow	Mesoderm
plasmacytoid_dendritic_cell	Lymph_Node	Mesoderm
endothelial_cell	Thymus	Mesoderm
mesenchymal_stem_cell	Fat	Mesoderm
smooth_muscle_cell	Trachea	Mesoderm
CD8-positive_alpha-beta_T_cell	Trachea	Mesoderm
unknown	Ovary	NA
glial_cell	Ovary	Ectoderm
hepatic_stellate_cell	Liver	Mesoderm
erythrocyte	Muscle	Mesoderm
transit_amplifying_cell_of_small_intestine	Small_Intestine	Endoderm
luminal_epithelial_cell_of_mammary_gland	Mammary	Ectoderm
vascular_associated_smooth_muscle_cell	Lung	Mesoderm
platelet	Spleen	Mesoderm
non-classical_monocyte	Spleen	Mesoderm
ventricular_cardiac_muscle_cell	Heart	Mesoderm
hematopoietic_stem_cell	Spleen	Mesoderm
CD4-positive_alpha-beta_T_cell	Uterus	Mesoderm
CD8-positive_alpha-beta_T_cell	Uterus	Mesoderm
macrophage	Uterus	Mesoderm
innate_lymphoid_cell	Uterus	Mesoderm
natural_killer_cell	Uterus	Mesoderm
T_cell	Uterus	Mesoderm
plasma_cell	Uterus	Mesoderm
B_cell	Uterus	Mesoderm
myeloid_dendritic_cell	Uterus	Mesoderm
regulatory_T_cell	Uterus	Mesoderm
monocyte	Fat	Mesoderm
pericyte	Fat	Mesoderm
erythrocyte	Fat	Mesoderm
intermediate_monocyte	Fat	Mesoderm
thymic_fibroblast_type_1	Thymus	Mesoderm
thymic_fibroblast_type_2	Thymus	Mesoderm
smooth_muscle_cell	Thymus	Mesoderm
naive_thymus-derived_CD8-positive_alpha-beta_T_cell	Thymus	Mesoderm
naive_thymus-derived_CD4-positive_alpha-beta_T_cell	Thymus	Mesoderm
neuro-medullary_thymic_epithelial_cell	Thymus	Endoderm
mesothelial_cell	Thymus	Mesoderm
serous_cell_of_epithelium_of_trachea	Trachea	Endoderm
mast_cell	Trachea	Mesoderm
monocyte	Trachea	Mesoderm
CD4-positive_alpha-beta_T_cell	Trachea	Mesoderm
natural_killer_cell	Trachea	Mesoderm
non-classical_monocyte	Trachea	Mesoderm
regulatory_T_cell	Blood	Mesoderm
hematopoietic_precursor_cell	Blood	Mesoderm
non-classical_monocyte	Blood	Mesoderm
macrophage	Blood	Mesoderm
BEST4+_enterocyte	Large_Intestine	Endoderm
transit_amplifying_cell_of_colon	Large_Intestine	Endoderm
myeloid_leukocyte	Large_Intestine	Mesoderm
mature_NK_T_cell	Large_Intestine	Mesoderm
regulatory_T_cell	Large_Intestine	Mesoderm
erythrocyte	Bladder	Mesoderm
capillary_endothelial_cell	Bladder	Mesoderm
mature_NK_T_cell	Bladder	Mesoderm
gamma-delta_T_cell	Small_Intestine	Mesoderm
monocyte	Small_Intestine	Mesoderm
naive_thymus-derived_CD4-positive_alpha-beta_T_cell	Small_Intestine	Mesoderm
naive_thymus-derived_CD8-positive_alpha-beta_T_cell	Spleen	Mesoderm
hematopoietic_precursor_cell	Spleen	Mesoderm
monocyte	Heart	Mesoderm
plasmacytoid_dendritic_cell	Heart	Mesoderm
natural_killer_cell	Heart	Mesoderm
CD8-positive_alpha-beta_T_cell	Heart	Mesoderm
B_cell	Heart	Mesoderm
T_cell	Spleen	Mesoderm
stromal_cell_of_ovary	Ovary	Mesoderm
ovarian_surface_epithelial_cell	Ovary	Mesoderm
macrophage	Ovary	Mesoderm
CD8-positive_alpha-beta_T_cell	Ovary	Mesoderm
neutrophil	Ovary	Mesoderm
CD4-positive_alpha-beta_T_cell	Ovary	Mesoderm
hematopoietic_precursor_cell	Ovary	Mesoderm
monocyte	Ovary	Mesoderm
T_cell	Ovary	Mesoderm
pancreatic_acinar_cell	Pancreas	Endoderm
pancreatic_ductal_cell	Pancreas	Endoderm
endothelial_cell	Pancreas	Mesoderm
pancreatic_A_cell	Pancreas	Endoderm
type_B_pancreatic_cell	Pancreas	Endoderm
pancreatic_D_cell	Pancreas	Endoderm
monocyte	Pancreas	Mesoderm
pancreatic_stellate_cell	Pancreas	Mesoderm
macrophage	Pancreas	Mesoderm
pancreatic_PP_cell	Pancreas	Endoderm
CD8-positive_alpha-beta_T_cell	Pancreas	Mesoderm
fibroblast	Pancreas	Mesoderm
CD4-positive_alpha-beta_thymocyte	Thymus	Mesoderm
myo-medullary_thymic_epithelial_cell	Thymus	Endoderm
basophil	Muscle	Mesoderm
endothelial_cell	Muscle	Mesoderm
neutrophil	Muscle	Mesoderm
natural_killer_cell	Muscle	Mesoderm
epithelial_cell	Muscle	Mesoderm
monocyte	Muscle	Mesoderm
non-classical_monocyte	Salivary_Gland	Mesoderm
intermediate_monocyte	Salivary_Gland	Mesoderm
neutrophil	Skin	Mesoderm
intermediate_monocyte	Muscle	Mesoderm
macrophage	Prostate	Mesoderm
mature_NK_T_cell	Prostate	Mesoderm
erythrocyte	Prostate	Mesoderm
CD4-positive_alpha-beta_T_cell	Prostate	Mesoderm
mast_cell	Prostate	Mesoderm
T_cell	Bone_Marrow	Mesoderm
hematopoietic_precursor_cell	Bone_Marrow	Mesoderm
classical_monocyte	Bone_Marrow	Mesoderm
intermediate_monocyte	Bone_Marrow	Mesoderm
intermediate_monocyte	Blood	Mesoderm
mature_NK_T_cell	Vasculature	Mesoderm
monocyte	Vasculature	Mesoderm
basophil	Vasculature	Mesoderm
T_cell	Trachea	Mesoderm
mature_NK_T_cell	Trachea	Mesoderm
regulatory_T_cell	Trachea	Mesoderm
intermediate_monocyte	Trachea	Mesoderm
myeloid_dendritic_cell	Trachea	Mesoderm
plasmacytoid_dendritic_cell	Trachea	Mesoderm
mature_NK_T_cell	Lung	Mesoderm
mast_cell	Lung	Mesoderm
monocyte	Lung	Mesoderm
mast_cell	Mammary	Mesoderm
mature_NK_T_cell	Mammary	Mesoderm
progenitor_cell_of_mammary_luminal_epithelium	Mammary	Ectoderm
plasma_cell	Mammary	Mesoderm
basophil	Mammary	Mesoderm
natural_killer_cell	Mammary	Mesoderm
regulatory_T_cell	Mammary	Mesoderm
mature_NK_T_cell	Bone_Marrow	Mesoderm
plasmacytoid_dendritic_cell	Bone_Marrow	Mesoderm
basophil	Bone_Marrow	Mesoderm
plasmacytoid_dendritic_cell	Blood	Mesoderm
basophil	Blood	Mesoderm
hematopoietic_precursor_cell	Thymus	Mesoderm
common_myeloid_progenitor	Blood	Mesoderm
spermatid	Testis	Epiblast
spermatocyte	Testis	Epiblast
male_germ_cell	Testis	Epiblast
stromal_cell	Testis	Mesoderm
Leydig_cell	Testis	Mesoderm
endothelial_cell	Testis	Mesoderm
peritubular_myoid_cell	Testis	Mesoderm
spermatogonium	Testis	Epiblast
tissue-resident_macrophage	Testis	Mesoderm
CD4-positive_alpha-beta_T_cell	Testis	Mesoderm
CD8-positive_alpha-beta_T_cell	Testis	Mesoderm
macrophage	Testis	Mesoderm
mast_cell	Testis	Mesoderm
neutrophil	Lymph_Node	Mesoderm
T_cell	Lymph_Node	Mesoderm
intermediate_monocyte	Vasculature	Mesoderm
muscle_cell	Eye	Mesoderm
classical_monocyte	Eye	Mesoderm
erythrocyte	Eye	Mesoderm
retina_horizontal_cell	Eye	Ectoderm
neutrophil	Eye	Mesoderm
classical_monocyte	Vasculature	Mesoderm
non-classical_monocyte	Vasculature	Mesoderm
classical_monocyte	Salivary_Gland	Mesoderm
T_cell	Salivary_Gland	Mesoderm
stromal_cell	Ear	Mesoderm
hematopoietic_cell	Ear	Mesoderm
pericyte	Ear	Mesoderm
endothelial_cell_of_vascular_tree	Ear	Mesoderm
melanocyte	Ear	Ectoderm
macrophage	Ear	Mesoderm
vascular_associated_smooth_muscle_cell	Ear	Mesoderm
CD4-positive_alpha-beta_T_cell	Ear	Mesoderm
mast_cell	Ear	Mesoderm
supporting_cell_of_vestibular_epithelium	Ear	Ectoderm
vestibular_dark_cell	Ear	Ectoderm
B_cell	Ear	Mesoderm
intermediate_monocyte	Ear	Mesoderm
monocyte	Ear	Mesoderm
neutrophil	Ear	Mesoderm
CD8-positive_alpha-beta_T_cell	Ear	Mesoderm
mature_NK_T_cell	Eye	Mesoderm
smooth_muscle_cell	Eye	Mesoderm
natural_killer_cell	Eye	Mesoderm
non-classical_monocyte	Eye	Mesoderm
basophil	Eye	Mesoderm
intermediate_monocyte	Eye	Mesoderm
retinal_ganglion_cell	Eye	Ectoderm
mature_NK_T_cell	Fat	Mesoderm
hematopoietic_precursor_cell	Salivary_Gland	Mesoderm
innate_lymphoid_cell	Small_Intestine	Mesoderm
myeloid_dendritic_cell	Small_Intestine	Mesoderm
non-classical_monocyte	Bone_Marrow	Mesoderm
myeloid_leukocyte	Eye	Mesoderm
connective_tissue_cell	Trachea	Mesoderm
naive_thymus-derived_CD4-positive_alpha-beta_T_cell	Large_Intestine	Mesoderm
natural_killer_cell	Large_Intestine	Mesoderm
CD8-positive_alpha-beta_T_cell	Tongue	Mesoderm
B_cell	Tongue	Mesoderm
monocyte	Tongue	Mesoderm
Schwann_cell	Tongue	Ectoderm
endothelial_cell_of_lymphatic_vessel	Tongue	Mesoderm
mast_cell	Tongue	Mesoderm
natural_killer_cell	Tongue	Mesoderm
T_cell	Tongue	Mesoderm
myeloid_dendritic_cell	Tongue	Mesoderm
regulatory_T_cell	Tongue	Mesoderm
myoepithelial_cell	Tongue	Ectoderm
myometrial_cell	Uterus	Mesoderm
mast_cell	Uterus	Mesoderm
neutrophil	Uterus	Mesoderm
monocyte	Uterus	Mesoderm
mature_NK_T_cell	Uterus	Mesoderm
interstitial_cell_of_Cajal	Stomach	Mesoderm
enteroendocrine_cell	Stomach	Endoderm
endothelial_cell_of_lymphatic_vessel	Stomach	Mesoderm
smooth_muscle_cell	Stomach	Mesoderm
classical_monocyte	Liver	Mesoderm
intermediate_monocyte	Liver	Mesoderm
non-classical_monocyte	Muscle	Mesoderm
non-classical_monocyte	Liver	Mesoderm
mast_cell	Liver	Mesoderm
hematopoietic_precursor_cell	Liver	Mesoderm
hematopoietic_precursor_cell	Lymph_Node	Mesoderm
intermediate_monocyte	Uterus	Mesoderm
basophil	Spleen	Mesoderm
regulatory_T_cell	Small_Intestine	Mesoderm
innate_lymphoid_cell	Trachea	Mesoderm
neuron	Heart	Ectoderm
CD4-positive_alpha-beta_T_cell	Heart	Mesoderm
mature_NK_T_cell	Heart	Mesoderm
plasma_cell	Heart	Mesoderm
platelet	Heart	Mesoderm
plasmacytoid_dendritic_cell	Ovary	Mesoderm
mast_cell	Ovary	Mesoderm
mature_NK_T_cell	Ovary	Mesoderm
neutrophil	Stomach	Mesoderm
mature_NK_T_cell	Stomach	Mesoderm
plasmacytoid_dendritic_cell	Liver	Mesoderm
regulatory_T_cell	Bladder	Mesoderm
skeletal_muscle_satellite_stem_cell	Uterus	Mesoderm
myofibroblast_cell	Uterus	Mesoderm
granulocyte	Muscle	Mesoderm
hematopoietic_precursor_cell	Fat	Mesoderm
muscle_cell	Fat	Mesoderm
classical_monocyte	Pancreas	Mesoderm
natural_killer_cell	Pancreas	Mesoderm
B_cell	Pancreas	Mesoderm
intermediate_monocyte	Pancreas	Mesoderm
CD4-positive_alpha-beta_T_cell	Pancreas	Mesoderm
plasma_cell	Pancreas	Mesoderm
neutrophil	Pancreas	Mesoderm
T_cell	Pancreas	Mesoderm
non-classical_monocyte	Pancreas	Mesoderm
innate_lymphoid_cell	Large_Intestine	Mesoderm
regulatory_T_cell	Bone_Marrow	Mesoderm
classical_monocyte	Fat	Mesoderm
T_cell	Heart	Mesoderm
mast_cell	Heart	Mesoderm
mast_cell	Pancreas	Mesoderm
plasmacytoid_dendritic_cell	Lung	Mesoderm
neutrophil	Kidney	Mesoderm
endothelial_cell	Kidney	Mesoderm
monocyte	Kidney	Mesoderm
T_cell	Kidney	Mesoderm
non-classical_monocyte	Kidney	Mesoderm
plasma_cell	Kidney	Mesoderm
classical_monocyte	Ovary	Mesoderm
keratocyte	Skin	Ectoderm
erythrocyte	Skin	Mesoderm
muscle_cell	Skin	Mesoderm
B_cell	Testis	Mesoderm
monocyte	Testis	Mesoderm
granulocyte	Uterus	Mesoderm
enterocyte_of_epithelium_proper_of_jejunum	Small_Intestine	Endoderm
fibroblast	Spleen	Mesoderm
myeloid_dendritic_cell	Ovary	Mesoderm
intermediate_monocyte	Kidney	Mesoderm
non-classical_monocyte	Fat	Mesoderm
mature_NK_T_cell	Pancreas	Mesoderm
leukocyte	Salivary_Gland	Mesoderm
platelet	Fat	Mesoderm

## Sheet: table S3
NAME	GS<br> follow link to MSigDB	GS DETAILS	SIZE	ES	NES	NOM p-val	FDR q-val	FWER p-val	RANK AT MAX	LEADING EDGE
GOBP_CELL_JUNCTION_ASSEMBLY	GOBP_CELL_JUNCTION_ASSEMBLY	Details ...	474	0.148571	3.6767	0	0	0	3747	tags=41%, list=26%, signal=53%
GOBP_GOLGI_VESICLE_TRANSPORT	GOBP_GOLGI_VESICLE_TRANSPORT	Details ...	264	0.196304	3.64836	0	0	0	7494	tags=72%, list=53%, signal=149%
GOBP_CELL_CELL_JUNCTION_ORGANIZATION	GOBP_CELL_CELL_JUNCTION_ORGANIZATION	Details ...	203	0.218596	3.5663	0	0	0	2469	tags=39%, list=17%, signal=46%
GOBP_CELL_CELL_ADHESION_VIA_PLASMA_MEMBRANE_ADHESION_MOLECULES	GOBP_CELL_CELL_ADHESION_VIA_PLASMA_MEMBRANE_ADHESION_MOLECULES	Details ...	192	0.222946	3.55688	0	0	0	4204	tags=52%, list=30%, signal=72%
GOBP_SENSORY_SYSTEM_DEVELOPMENT	GOBP_SENSORY_SYSTEM_DEVELOPMENT	Details ...	391	0.152242	3.5487	0	0	0	5495	tags=53%, list=39%, signal=85%
GOBP_REGULATION_OF_SYNAPSE_STRUCTURE_OR_ACTIVITY	GOBP_REGULATION_OF_SYNAPSE_STRUCTURE_OR_ACTIVITY	Details ...	348	0.162773	3.49903	0	0	0	6772	tags=64%, list=48%, signal=118%
GOBP_MICROTUBULE_ORGANIZING_CENTER_ORGANIZATION	GOBP_MICROTUBULE_ORGANIZING_CENTER_ORGANIZATION	Details ...	141	0.249278	3.4532	0	0	0	7987	tags=81%, list=56%, signal=183%
GOBP_CELL_CELL_JUNCTION_ASSEMBLY	GOBP_CELL_CELL_JUNCTION_ASSEMBLY	Details ...	140	0.242991	3.43998	0	0	0	2469	tags=41%, list=17%, signal=50%
GOBP_HOMOPHILIC_CELL_ADHESION_VIA_PLASMA_MEMBRANE_ADHESION_MOLECULES	GOBP_HOMOPHILIC_CELL_ADHESION_VIA_PLASMA_MEMBRANE_ADHESION_MOLECULES	Details ...	92	0.293164	3.33397	0	0	0	4204	tags=59%, list=30%, signal=83%
GOBP_ENDOTHELIUM_DEVELOPMENT	GOBP_ENDOTHELIUM_DEVELOPMENT	Details ...	144	0.239698	3.31949	0	0.000117768	0.001	3439	tags=48%, list=24%, signal=63%
GOBP_ENDOTHELIAL_CELL_DIFFERENTIATION	GOBP_ENDOTHELIAL_CELL_DIFFERENTIATION	Details ...	119	0.258563	3.29352	0	0.000107062	0.001	3762	tags=52%, list=26%, signal=70%
GOBP_CELL_PROJECTION_ASSEMBLY	GOBP_CELL_PROJECTION_ASSEMBLY	Details ...	475	0.131513	3.27274	0	9.81402e-05	0.001	5167	tags=49%, list=36%, signal=74%
GOBP_REGULATION_OF_VASCULATURE_DEVELOPMENT	GOBP_REGULATION_OF_VASCULATURE_DEVELOPMENT	Details ...	282	0.165205	3.26939	0	9.05909e-05	0.001	4958	tags=51%, list=35%, signal=77%
GOBP_CELL_CELL_ADHESION_MEDIATED_BY_CADHERIN	GOBP_CELL_CELL_ADHESION_MEDIATED_BY_CADHERIN	Details ...	39	0.43081	3.2521	0	8.41201e-05	0.001	2276	tags=59%, list=16%, signal=70%
GOBP_EPITHELIAL_TUBE_MORPHOGENESIS	GOBP_EPITHELIAL_TUBE_MORPHOGENESIS	Details ...	375	0.145212	3.20496	0	7.85121e-05	0.001	6028	tags=57%, list=42%, signal=96%
GOBP_EPITHELIAL_CELL_DEVELOPMENT	GOBP_EPITHELIAL_CELL_DEVELOPMENT	Details ...	233	0.181682	3.19029	0	7.36051e-05	0.001	3439	tags=42%, list=24%, signal=55%
GOBP_SENSORY_PERCEPTION	GOBP_SENSORY_PERCEPTION	Details ...	362	0.144288	3.14411	0	6.92754e-05	0.001	3617	tags=40%, list=25%, signal=52%
GOBP_EMBRYONIC_ORGAN_DEVELOPMENT	GOBP_EMBRYONIC_ORGAN_DEVELOPMENT	Details ...	479	0.121091	3.1181	0	6.54268e-05	0.001	5490	tags=50%, list=39%, signal=79%
GOBP_NEURAL_TUBE_DEVELOPMENT	GOBP_NEURAL_TUBE_DEVELOPMENT	Details ...	179	0.198875	3.11168	0	6.19833e-05	0.001	6025	tags=62%, list=42%, signal=106%
GOBP_MECHANORECEPTOR_DIFFERENTIATION	GOBP_MECHANORECEPTOR_DIFFERENTIATION	Details ...	77	0.295432	3.10457	0	0.000118194	0.002	3762	tags=56%, list=26%, signal=76%
GOBP_ENDOMEMBRANE_SYSTEM_ORGANIZATION	GOBP_ENDOMEMBRANE_SYSTEM_ORGANIZATION		491	0.123996	3.10009	0	0.00016822	0.003	8202	tags=70%, list=58%, signal=159%
GOBP_CELLULAR_COMPONENT_MAINTENANCE	GOBP_CELLULAR_COMPONENT_MAINTENANCE		84	0.286009	3.06935	0	0.000215337	0.004	2389	tags=45%, list=17%, signal=54%
GOBP_AXON_DEVELOPMENT	GOBP_AXON_DEVELOPMENT		487	0.119843	3.0423	0	0.000205974	0.004	5887	tags=53%, list=41%, signal=87%
GOBP_POSTSYNAPSE_ORGANIZATION	GOBP_POSTSYNAPSE_ORGANIZATION		274	0.158876	3.03187	0	0.000247989	0.005	3129	tags=38%, list=22%, signal=47%
GOBP_APICAL_JUNCTION_ASSEMBLY	GOBP_APICAL_JUNCTION_ASSEMBLY		80	0.294943	3.01857	0	0.000238069	0.005	3472	tags=54%, list=24%, signal=71%
GOBP_HAIR_CELL_DIFFERENTIATION	GOBP_HAIR_CELL_DIFFERENTIATION		54	0.341304	2.99734	0	0.000228913	0.005	3591	tags=59%, list=25%, signal=79%
GOBP_CILIUM_ORGANIZATION	GOBP_CILIUM_ORGANIZATION		303	0.147998	2.99701	0	0.000220435	0.005	5167	tags=51%, list=36%, signal=78%
GOBP_GOLGI_ORGANIZATION	GOBP_GOLGI_ORGANIZATION		125	0.233146	2.97721	0	0.000212562	0.005	7293	tags=74%, list=51%, signal=151%
GOBP_VESICLE_LOCALIZATION	GOBP_VESICLE_LOCALIZATION		196	0.180494	2.96409	0	0.000245979	0.006	9004	tags=81%, list=63%, signal=218%
GOBP_CELL_JUNCTION_MAINTENANCE	GOBP_CELL_JUNCTION_MAINTENANCE		57	0.333716	2.93846	0	0.000357178	0.009	2258	tags=49%, list=16%, signal=58%
GOBP_REGULATION_OF_CELLULAR_RESPONSE_TO_STRESS	GOBP_REGULATION_OF_CELLULAR_RESPONSE_TO_STRESS		474	0.119578	2.93833	0	0.000345656	0.009	10206	tags=83%, list=72%, signal=285%
GOBP_POSITIVE_REGULATION_OF_NOTCH_SIGNALING_PATHWAY	GOBP_POSITIVE_REGULATION_OF_NOTCH_SIGNALING_PATHWAY		38	0.397069	2.92159	0	0.000522283	0.014	4846	tags=74%, list=34%, signal=111%
GOBP_ENDOPLASMIC_RETICULUM_TO_GOLGI_VESICLE_MEDIATED_TRANSPORT	GOBP_ENDOPLASMIC_RETICULUM_TO_GOLGI_VESICLE_MEDIATED_TRANSPORT		114	0.236715	2.90288	0	0.000616963	0.017	8261	tags=82%, list=58%, signal=193%
GOBP_SPROUTING_ANGIOGENESIS	GOBP_SPROUTING_ANGIOGENESIS		130	0.217942	2.87699	0	0.0007751	0.022	8086	tags=78%, list=57%, signal=180%
GOBP_CALCIUM_DEPENDENT_CELL_CELL_ADHESION_VIA_PLASMA_MEMBRANE_CELL_ADHESION_MOLECULES	GOBP_CALCIUM_DEPENDENT_CELL_CELL_ADHESION_VIA_PLASMA_MEMBRANE_CELL_ADHESION_MOLECULES		31	0.424899	2.87183	0	0.000787226	0.023	4062	tags=71%, list=29%, signal=99%
GOBP_VACUOLE_ORGANIZATION	GOBP_VACUOLE_ORGANIZATION		217	0.170377	2.86346	0	0.000798309	0.023	9868	tags=86%, list=69%, signal=277%
GOBP_ESTABLISHMENT_OF_ORGANELLE_LOCALIZATION	GOBP_ESTABLISHMENT_OF_ORGANELLE_LOCALIZATION		414	0.124209	2.86202	0	0.000776733	0.023	6322	tags=57%, list=44%, signal=99%
GOBP_CELLULAR_RESPONSE_TO_VASCULAR_ENDOTHELIAL_GROWTH_FACTOR_STIMULUS	GOBP_CELLULAR_RESPONSE_TO_VASCULAR_ENDOTHELIAL_GROWTH_FACTOR_STIMULUS		100	0.244896	2.85626	0	0.00078817	0.024	4789	tags=58%, list=34%, signal=87%
GOBP_EXTRACELLULAR_STRUCTURE_ORGANIZATION	GOBP_EXTRACELLULAR_STRUCTURE_ORGANIZATION		293	0.139753	2.85459	0	0.00076796	0.024	4799	tags=47%, list=34%, signal=70%
GOBP_NEURON_PROJECTION_GUIDANCE	GOBP_NEURON_PROJECTION_GUIDANCE		215	0.165706	2.84552	0	0.000838991	0.027	5880	tags=58%, list=41%, signal=97%
GOBP_BLOOD_VESSEL_ENDOTHELIAL_CELL_MIGRATION	GOBP_BLOOD_VESSEL_ENDOTHELIAL_CELL_MIGRATION		125	0.217243	2.82067	0	0.000907253	0.03	8086	tags=78%, list=57%, signal=180%
GOBP_CENTROSOME_DUPLICATION	GOBP_CENTROSOME_DUPLICATION		72	0.279725	2.80994	0	0.000998882	0.034	7892	tags=83%, list=55%, signal=186%
GOBP_SMOOTHENED_SIGNALING_PATHWAY	GOBP_SMOOTHENED_SIGNALING_PATHWAY		149	0.194838	2.80646	0	0.0010034	0.035	5179	tags=56%, list=36%, signal=87%
GOBP_REGULATION_OF_CELL_JUNCTION_ASSEMBLY	GOBP_REGULATION_OF_CELL_JUNCTION_ASSEMBLY		273	0.147412	2.80483	0	0.000980594	0.035	5965	tags=56%, list=42%, signal=95%
GOBP_NEURON_MIGRATION	GOBP_NEURON_MIGRATION		180	0.1763	2.79175	0	0.00101218	0.037	3607	tags=43%, list=25%, signal=57%
GOBP_REGULATION_OF_PROTEIN_SECRETION	GOBP_REGULATION_OF_PROTEIN_SECRETION		293	0.140535	2.78379	0	0.00106907	0.04	5322	tags=51%, list=37%, signal=80%
GOBP_REGULATION_OF_EPITHELIAL_CELL_DIFFERENTIATION	GOBP_REGULATION_OF_EPITHELIAL_CELL_DIFFERENTIATION		165	0.179565	2.76125	0	0.00122563	0.047	4801	tags=52%, list=34%, signal=77%
GOBP_LYSOSOMAL_MEMBRANE_ORGANIZATION	GOBP_LYSOSOMAL_MEMBRANE_ORGANIZATION		16	0.555605	2.74721	0	0.00137628	0.054	4550	tags=88%, list=32%, signal=129%
GOBP_TIGHT_JUNCTION_ORGANIZATION	GOBP_TIGHT_JUNCTION_ORGANIZATION		85	0.251404	2.73657	0	0.00139771	0.056	3472	tags=49%, list=24%, signal=65%
GOBP_INNER_EAR_RECEPTOR_CELL_DEVELOPMENT	GOBP_INNER_EAR_RECEPTOR_CELL_DEVELOPMENT		51	0.322802	2.73409	0	0.00144068	0.059	7694	tags=86%, list=54%, signal=187%
GOBP_ENDOTHELIAL_CELL_MIGRATION	GOBP_ENDOTHELIAL_CELL_MIGRATION		222	0.157997	2.71155	0	0.00164799	0.069	4129	tags=45%, list=29%, signal=62%
GOBP_MORPHOGENESIS_OF_A_BRANCHING_STRUCTURE	GOBP_MORPHOGENESIS_OF_A_BRANCHING_STRUCTURE		237	0.149425	2.70542	0	0.00166237	0.071	5830	tags=56%, list=41%, signal=93%
GOBP_NUCLEUS_ORGANIZATION	GOBP_NUCLEUS_ORGANIZATION		128	0.203784	2.70365	0	0.00165399	0.072	5793	tags=61%, list=41%, signal=102%
GOBP_POSITIVE_REGULATION_OF_CELL_PROJECTION_ORGANIZATION	GOBP_POSITIVE_REGULATION_OF_CELL_PROJECTION_ORGANIZATION		406	0.115179	2.68837	0	0.00171327	0.075	5133	tags=47%, list=36%, signal=72%
GOBP_FAT_CELL_DIFFERENTIATION	GOBP_FAT_CELL_DIFFERENTIATION		250	0.149408	2.68789	0.0019685	0.0017038	0.076	5079	tags=50%, list=36%, signal=77%
GOBP_BRANCHING_MORPHOGENESIS_OF_AN_EPITHELIAL_TUBE	GOBP_BRANCHING_MORPHOGENESIS_OF_AN_EPITHELIAL_TUBE		185	0.169189	2.68751	0	0.00169461	0.077	6080	tags=59%, list=43%, signal=103%
GOBP_NEGATIVE_REGULATION_OF_FAT_CELL_DIFFERENTIATION	GOBP_NEGATIVE_REGULATION_OF_FAT_CELL_DIFFERENTIATION		53	0.309486	2.68722	0	0.00166488	0.077	7152	tags=81%, list=50%, signal=163%
GOBP_GLYCOPROTEIN_BIOSYNTHETIC_PROCESS	GOBP_GLYCOPROTEIN_BIOSYNTHETIC_PROCESS		272	0.143725	2.68268	0	0.00169955	0.08	7196	tags=65%, list=51%, signal=128%
GOBP_PROTEIN_LOCALIZATION_TO_EXTRACELLULAR_REGION	GOBP_PROTEIN_LOCALIZATION_TO_EXTRACELLULAR_REGION		378	0.120973	2.67532	0	0.00183415	0.088	5322	tags=49%, list=37%, signal=77%
GOBP_PROTEIN_LOCALIZATION_TO_CYTOSKELETON	GOBP_PROTEIN_LOCALIZATION_TO_CYTOSKELETON		57	0.296677	2.65923	0	0.00206558	0.098	6026	tags=72%, list=42%, signal=124%
GOBP_NON_MOTILE_CILIUM_ASSEMBLY	GOBP_NON_MOTILE_CILIUM_ASSEMBLY		59	0.289669	2.64892	0	0.00221051	0.107	5056	tags=64%, list=36%, signal=100%
GOBP_MEMBRANE_FISSION	GOBP_MEMBRANE_FISSION		31	0.384694	2.63456	0	0.00244704	0.121	5550	tags=77%, list=39%, signal=127%
GOBP_DOUBLE_STRAND_BREAK_REPAIR	GOBP_DOUBLE_STRAND_BREAK_REPAIR		258	0.140308	2.63294	0	0.00242729	0.122	10938	tags=91%, list=77%, signal=386%
GOBP_REGULATION_OF_DNA_REPAIR	GOBP_REGULATION_OF_DNA_REPAIR		191	0.164938	2.63043	0	0.00242726	0.124	10938	tags=93%, list=77%, signal=398%
GOBP_SMALL_GTPASE_MEDIATED_SIGNAL_TRANSDUCTION	GOBP_SMALL_GTPASE_MEDIATED_SIGNAL_TRANSDUCTION		409	0.116767	2.62151	0.002	0.00264815	0.136	4471	tags=43%, list=31%, signal=61%
GOBP_ERK1_AND_ERK2_CASCADE	GOBP_ERK1_AND_ERK2_CASCADE		294	0.130034	2.61408	0	0.00271788	0.142	5492	tags=51%, list=39%, signal=82%
GOBP_SENSORY_ORGAN_MORPHOGENESIS	GOBP_SENSORY_ORGAN_MORPHOGENESIS		280	0.134645	2.61092	0	0.0027848	0.147	4369	tags=44%, list=31%, signal=62%
GOBP_CYTOSOLIC_TRANSPORT	GOBP_CYTOSOLIC_TRANSPORT		113	0.213517	2.59711	0	0.00302777	0.162	10956	tags=98%, list=77%, signal=424%
GOBP_EPHRIN_RECEPTOR_SIGNALING_PATHWAY	GOBP_EPHRIN_RECEPTOR_SIGNALING_PATHWAY		70	0.264476	2.5963	0	0.00300144	0.163	4789	tags=60%, list=34%, signal=90%
GOBP_NUCLEAR_MEMBRANE_REASSEMBLY	GOBP_NUCLEAR_MEMBRANE_REASSEMBLY		21	0.469044	2.59515	0	0.00295857	0.163	5528	tags=86%, list=39%, signal=140%
GOBP_PROTEIN_LOCALIZATION_TO_NUCLEUS	GOBP_PROTEIN_LOCALIZATION_TO_NUCLEUS		308	0.128443	2.59326	0	0.00295089	0.164	8416	tags=72%, list=59%, signal=172%
GOBP_MAINTENANCE_OF_SYNAPSE_STRUCTURE	GOBP_MAINTENANCE_OF_SYNAPSE_STRUCTURE		36	0.369864	2.59143	0	0.00294335	0.166	2258	tags=53%, list=16%, signal=63%
GOBP_REGULATION_OF_NERVOUS_SYSTEM_DEVELOPMENT	GOBP_REGULATION_OF_NERVOUS_SYSTEM_DEVELOPMENT		494	0.102624	2.5877	0	0.00298508	0.171	5672	tags=50%, list=40%, signal=80%
GOBP_REGULATION_OF_BLOOD_VESSEL_ENDOTHELIAL_CELL_MIGRATION	GOBP_REGULATION_OF_BLOOD_VESSEL_ENDOTHELIAL_CELL_MIGRATION		93	0.228527	2.57695	0	0.00330508	0.191	8086	tags=80%, list=57%, signal=183%
GOBP_TELENCEPHALON_DEVELOPMENT	GOBP_TELENCEPHALON_DEVELOPMENT		270	0.133798	2.57498	0	0.00330927	0.194	6981	tags=62%, list=49%, signal=120%
GOBP_REGULATION_OF_ENDOTHELIAL_CELL_MIGRATION	GOBP_REGULATION_OF_ENDOTHELIAL_CELL_MIGRATION		163	0.171675	2.57241	0	0.00336098	0.199	4129	tags=46%, list=29%, signal=64%
GOBP_VIRAL_RELEASE_FROM_HOST_CELL	GOBP_VIRAL_RELEASE_FROM_HOST_CELL		24	0.434766	2.56755	0	0.00337896	0.203	6270	tags=88%, list=44%, signal=156%
GOBP_VASCULAR_ENDOTHELIAL_GROWTH_FACTOR_SIGNALING_PATHWAY	GOBP_VASCULAR_ENDOTHELIAL_GROWTH_FACTOR_SIGNALING_PATHWAY		81	0.244816	2.56559	0	0.0034278	0.207	4789	tags=58%, list=34%, signal=87%
GOBP_ENDOTHELIAL_CELL_DEVELOPMENT	GOBP_ENDOTHELIAL_CELL_DEVELOPMENT		71	0.257805	2.56128	0	0.00350654	0.214	3762	tags=52%, list=26%, signal=71%
GOBP_MULTIVESICULAR_BODY_ORGANIZATION	GOBP_MULTIVESICULAR_BODY_ORGANIZATION		15	0.545117	2.56061	0	0.00346271	0.214	5528	tags=93%, list=39%, signal=153%
GOBP_TRNA_METABOLIC_PROCESS	GOBP_TRNA_METABOLIC_PROCESS		144	0.181363	2.56059	0	0.00341996	0.214	8803	tags=80%, list=62%, signal=207%
GOBP_MACROAUTOPHAGY	GOBP_MACROAUTOPHAGY		284	0.129427	2.55552	0	0.00349443	0.222	10263	tags=85%, list=72%, signal=299%
GOBP_ENDOSOMAL_TRANSPORT	GOBP_ENDOSOMAL_TRANSPORT		246	0.13745	2.54552	0.00189753	0.00368631	0.232	7501	tags=66%, list=53%, signal=138%
GOBP_VIRAL_BUDDING_VIA_HOST_ESCRT_COMPLEX	GOBP_VIRAL_BUDDING_VIA_HOST_ESCRT_COMPLEX		15	0.545117	2.5427	0	0.00372775	0.238	5528	tags=93%, list=39%, signal=153%
GOBP_POSITIVE_REGULATION_OF_DNA_REPAIR	GOBP_POSITIVE_REGULATION_OF_DNA_REPAIR		123	0.196304	2.5413	0	0.00375563	0.241	9487	tags=86%, list=67%, signal=257%
GOBP_CEREBRAL_CORTEX_DEVELOPMENT	GOBP_CEREBRAL_CORTEX_DEVELOPMENT		128	0.190438	2.53846	0	0.00385211	0.247	6981	tags=68%, list=49%, signal=132%
GOBP_VASCULOGENESIS	GOBP_VASCULOGENESIS		88	0.230844	2.53211	0	0.00404302	0.258	4655	tags=56%, list=33%, signal=82%
GOBP_GLYCOSYLATION	GOBP_GLYCOSYLATION		199	0.154369	2.53167	0	0.00399707	0.258	7196	tags=66%, list=51%, signal=131%
GOBP_PHOTORECEPTOR_CELL_MAINTENANCE	GOBP_PHOTORECEPTOR_CELL_MAINTENANCE		39	0.339356	2.52944	0	0.00400578	0.26	3573	tags=59%, list=25%, signal=79%
GOBP_CELLULAR_RESPONSE_TO_NUTRIENT_LEVELS	GOBP_CELLULAR_RESPONSE_TO_NUTRIENT_LEVELS		247	0.137239	2.51953	0	0.00420215	0.273	8675	tags=74%, list=61%, signal=188%
GOBP_ERBB_SIGNALING_PATHWAY	GOBP_ERBB_SIGNALING_PATHWAY		163	0.169951	2.51936	0	0.00415597	0.273	3717	tags=43%, list=26%, signal=57%
GOBP_FOREBRAIN_DEVELOPMENT	GOBP_FOREBRAIN_DEVELOPMENT		397	0.1118	2.51398	0	0.00430891	0.284	4758	tags=44%, list=33%, signal=65%
GOBP_VESICLE_BUDDING_FROM_MEMBRANE	GOBP_VESICLE_BUDDING_FROM_MEMBRANE		76	0.244741	2.51232	0	0.00434027	0.288	7390	tags=76%, list=52%, signal=158%
GOBP_CENTRAL_NERVOUS_SYSTEM_NEURON_DIFFERENTIATION	GOBP_CENTRAL_NERVOUS_SYSTEM_NEURON_DIFFERENTIATION		216	0.145908	2.51029	0	0.00434535	0.29	4276	tags=44%, list=30%, signal=63%
GOBP_REGULATION_OF_CENTROSOME_CYCLE	GOBP_REGULATION_OF_CENTROSOME_CYCLE		55	0.283036	2.50915	0	0.00432511	0.292	8142	tags=85%, list=57%, signal=199%
GOBP_RETINA_HOMEOSTASIS	GOBP_RETINA_HOMEOSTASIS		51	0.295994	2.50595	0	0.00439259	0.297	2497	tags=47%, list=18%, signal=57%
GOBP_CELL_MIGRATION_INVOLVED_IN_SPROUTING_ANGIOGENESIS	GOBP_CELL_MIGRATION_INVOLVED_IN_SPROUTING_ANGIOGENESIS		58	0.278846	2.50459	0.00204082	0.00443383	0.304	8064	tags=84%, list=57%, signal=194%
GOBP_EPIDERMAL_CELL_DIFFERENTIATION	GOBP_EPIDERMAL_CELL_DIFFERENTIATION		205	0.150742	2.50458	0	0.00438858	0.304	3089	tags=37%, list=22%, signal=46%
GOBP_NERVE_DEVELOPMENT	GOBP_NERVE_DEVELOPMENT		89	0.227914	2.49804	0	0.00458552	0.318	2850	tags=43%, list=20%, signal=53%
GOBP_PROCESS_UTILIZING_AUTOPHAGIC_MECHANISM	GOBP_PROCESS_UTILIZING_AUTOPHAGIC_MECHANISM		478	0.101754	2.48566	0	0.00498389	0.347	10263	tags=82%, list=72%, signal=285%
GOBP_CRANIAL_NERVE_DEVELOPMENT	GOBP_CRANIAL_NERVE_DEVELOPMENT		55	0.282448	2.48553	0	0.00494644	0.347	4789	tags=62%, list=34%, signal=93%
GOBP_ADENYLATE_CYCLASE_MODULATING_G_PROTEIN_COUPLED_RECEPTOR_SIGNALING_PATHWAY	GOBP_ADENYLATE_CYCLASE_MODULATING_G_PROTEIN_COUPLED_RECEPTOR_SIGNALING_PATHWAY		168	0.167702	2.48356	0	0.00493273	0.349	3737	tags=43%, list=26%, signal=57%
GOBP_INSULIN_METABOLIC_PROCESS	GOBP_INSULIN_METABOLIC_PROCESS		23	0.427537	2.48049	0	0.00490855	0.351	4440	tags=74%, list=31%, signal=107%
GOBP_GLYCOPROTEIN_METABOLIC_PROCESS	GOBP_GLYCOPROTEIN_METABOLIC_PROCESS		332	0.120674	2.47903	0	0.00490709	0.354	7361	tags=64%, list=52%, signal=129%
GOBP_NEGATIVE_REGULATION_OF_EPITHELIAL_CELL_PROLIFERATION	GOBP_NEGATIVE_REGULATION_OF_EPITHELIAL_CELL_PROLIFERATION		154	0.170787	2.47883	0	0.00486036	0.354	4430	tags=48%, list=31%, signal=69%
GOBP_INSULIN_SECRETION	GOBP_INSULIN_SECRETION		229	0.13941	2.47633	0	0.00491698	0.357	2147	tags=29%, list=15%, signal=33%
GOBP_LYTIC_VACUOLE_ORGANIZATION	GOBP_LYTIC_VACUOLE_ORGANIZATION		92	0.223295	2.47505	0	0.00493875	0.359	8901	tags=85%, list=63%, signal=225%
GOBP_PROTEIN_LOCALIZATION_TO_CELL_PERIPHERY	GOBP_PROTEIN_LOCALIZATION_TO_CELL_PERIPHERY		358	0.112043	2.47112	0	0.00502741	0.37	6311	tags=55%, list=44%, signal=97%
GOBP_CYTOKINETIC_PROCESS	GOBP_CYTOKINETIC_PROCESS		48	0.29972	2.46691	0	0.0051807	0.382	5528	tags=69%, list=39%, signal=112%
GOBP_CHROMOSOME_SEGREGATION	GOBP_CHROMOSOME_SEGREGATION		352	0.116114	2.46561	0.00203666	0.00516666	0.384	11034	tags=89%, list=78%, signal=387%
GOBP_REGULATION_OF_FAT_CELL_DIFFERENTIATION	GOBP_REGULATION_OF_FAT_CELL_DIFFERENTIATION		135	0.182326	2.46357	0.00205761	0.00522859	0.386	5542	tags=57%, list=39%, signal=93%
GOBP_ESTABLISHMENT_OR_MAINTENANCE_OF_CELL_POLARITY	GOBP_ESTABLISHMENT_OR_MAINTENANCE_OF_CELL_POLARITY		200	0.151008	2.46202	0	0.005236	0.388	6201	tags=58%, list=44%, signal=102%
GOBP_VIRAL_BUDDING	GOBP_VIRAL_BUDDING		17	0.494152	2.44562	0	0.00589354	0.429	5528	tags=88%, list=39%, signal=144%
GOBP_MESENCHYME_DEVELOPMENT	GOBP_MESENCHYME_DEVELOPMENT		299	0.123297	2.44229	0	0.00595795	0.431	4846	tags=46%, list=34%, signal=69%
GOBP_REGULATION_OF_POSTSYNAPSE_ORGANIZATION	GOBP_REGULATION_OF_POSTSYNAPSE_ORGANIZATION		171	0.160249	2.43944	0	0.00605255	0.44	7145	tags=66%, list=50%, signal=131%
GOBP_PRIMARY_NEURAL_TUBE_FORMATION	GOBP_PRIMARY_NEURAL_TUBE_FORMATION		108	0.20128	2.43878	0	0.00603139	0.443	6639	tags=67%, list=47%, signal=124%
GOBP_SYNAPSE_PRUNING	GOBP_SYNAPSE_PRUNING		17	0.494393	2.43779	0	0.00603145	0.445	3015	tags=71%, list=21%, signal=89%
GOBP_POSITIVE_REGULATION_OF_CATABOLIC_PROCESS	GOBP_POSITIVE_REGULATION_OF_CATABOLIC_PROCESS		492	0.097725	2.43584	0.00203666	0.00605231	0.451	8138	tags=67%, list=57%, signal=150%
GOBP_NEGATIVE_REGULATION_OF_LOCOMOTION	GOBP_NEGATIVE_REGULATION_OF_LOCOMOTION		312	0.119377	2.43536	0	0.0060212	0.453	4264	tags=42%, list=30%, signal=58%
GOBP_RETROGRADE_VESICLE_MEDIATED_TRANSPORT_GOLGI_TO_ENDOPLASMIC_RETICULUM	GOBP_RETROGRADE_VESICLE_MEDIATED_TRANSPORT_GOLGI_TO_ENDOPLASMIC_RETICULUM		45	0.309735	2.43418	0	0.00603134	0.455	6985	tags=80%, list=49%, signal=157%
GOBP_TRNA_PROCESSING	GOBP_TRNA_PROCESSING		104	0.204075	2.42976	0	0.00617201	0.464	8741	tags=82%, list=61%, signal=211%
GOBP_ANATOMICAL_STRUCTURE_ARRANGEMENT	GOBP_ANATOMICAL_STRUCTURE_ARRANGEMENT		21	0.446315	2.42558	0	0.00624971	0.469	3142	tags=67%, list=22%, signal=85%
GOBP_VASCULAR_ENDOTHELIAL_GROWTH_FACTOR_RECEPTOR_SIGNALING_PATHWAY	GOBP_VASCULAR_ENDOTHELIAL_GROWTH_FACTOR_RECEPTOR_SIGNALING_PATHWAY		90	0.217074	2.42382	0	0.00631584	0.477	3726	tags=48%, list=26%, signal=64%
GOBP_IN_UTERO_EMBRYONIC_DEVELOPMENT	GOBP_IN_UTERO_EMBRYONIC_DEVELOPMENT		500	0.0948048	2.42306	0.0019802	0.00627473	0.478	8596	tags=70%, list=60%, signal=170%
GOBP_POSITIVE_REGULATION_OF_VASCULATURE_DEVELOPMENT	GOBP_POSITIVE_REGULATION_OF_VASCULATURE_DEVELOPMENT		166	0.165268	2.42288	0	0.00623446	0.478	4958	tags=51%, list=35%, signal=78%
GOBP_TUBE_FORMATION	GOBP_TUBE_FORMATION		167	0.161111	2.42001	0.00194553	0.00631866	0.487	6080	tags=59%, list=43%, signal=101%
GOBP_INNER_EAR_RECEPTOR_CELL_STEREOCILIUM_ORGANIZATION	GOBP_INNER_EAR_RECEPTOR_CELL_STEREOCILIUM_ORGANIZATION		38	0.336246	2.41777	0	0.0063633	0.493	3089	tags=55%, list=22%, signal=70%
GOBP_TRNA_MODIFICATION	GOBP_TRNA_MODIFICATION		71	0.245798	2.41648	0	0.00640795	0.499	8739	tags=86%, list=61%, signal=222%
GOBP_POSITIVE_REGULATION_OF_NERVOUS_SYSTEM_DEVELOPMENT	GOBP_POSITIVE_REGULATION_OF_NERVOUS_SYSTEM_DEVELOPMENT		327	0.115566	2.41392	0	0.00647024	0.506	5830	tags=52%, list=41%, signal=87%
GOBP_NEGATIVE_REGULATION_OF_EXTRINSIC_APOPTOTIC_SIGNALING_PATHWAY	GOBP_NEGATIVE_REGULATION_OF_EXTRINSIC_APOPTOTIC_SIGNALING_PATHWAY		94	0.21102	2.4118	0	0.00650383	0.51	5490	tags=60%, list=39%, signal=96%
GOBP_INSULIN_LIKE_GROWTH_FACTOR_RECEPTOR_SIGNALING_PATHWAY	GOBP_INSULIN_LIKE_GROWTH_FACTOR_RECEPTOR_SIGNALING_PATHWAY		90	0.220123	2.41133	0	0.00648176	0.512	4789	tags=56%, list=34%, signal=83%
GOBP_REGULATION_OF_VASCULAR_PERMEABILITY	GOBP_REGULATION_OF_VASCULAR_PERMEABILITY		45	0.298512	2.4108	0	0.00646945	0.515	5880	tags=71%, list=41%, signal=121%
GOBP_NUCLEAR_MEMBRANE_ORGANIZATION	GOBP_NUCLEAR_MEMBRANE_ORGANIZATION		34	0.347333	2.41034	0	0.00642983	0.516	5528	tags=74%, list=39%, signal=120%
GOBP_AUTOPHAGOSOME_MATURATION	GOBP_AUTOPHAGOSOME_MATURATION		57	0.269522	2.40305	0	0.00672324	0.532	10153	tags=98%, list=71%, signal=342%
GOBP_MEMBRANE_FUSION	GOBP_MEMBRANE_FUSION		150	0.165043	2.39967	0.00198807	0.00685273	0.545	7821	tags=71%, list=55%, signal=157%
GOBP_VESICLE_TARGETING	GOBP_VESICLE_TARGETING		51	0.275615	2.39888	0	0.00682018	0.546	9478	tags=94%, list=67%, signal=281%
GOBP_REGULATION_OF_PROTEIN_CATABOLIC_PROCESS	GOBP_REGULATION_OF_PROTEIN_CATABOLIC_PROCESS		331	0.113436	2.39595	0	0.00687564	0.552	8348	tags=70%, list=59%, signal=165%
GOBP_NEUROMUSCULAR_PROCESS_CONTROLLING_BALANCE	GOBP_NEUROMUSCULAR_PROCESS_CONTROLLING_BALANCE		65	0.255275	2.39578	0	0.00682582	0.552	3824	tags=52%, list=27%, signal=71%
GOBP_ENDOSOME_TO_LYSOSOME_TRANSPORT	GOBP_ENDOSOME_TO_LYSOSOME_TRANSPORT		58	0.27235	2.39378	0	0.00686315	0.556	8156	tags=84%, list=57%, signal=197%
GOBP_PALLIUM_DEVELOPMENT	GOBP_PALLIUM_DEVELOPMENT		183	0.15585	2.39286	0	0.0068659	0.56	6981	tags=64%, list=49%, signal=125%
GOBP_RESPONSE_TO_TOPOLOGICALLY_INCORRECT_PROTEIN	GOBP_RESPONSE_TO_TOPOLOGICALLY_INCORRECT_PROTEIN		134	0.177484	2.39284	0	0.0068172	0.56	10234	tags=90%, list=72%, signal=316%
GOBP_NEGATIVE_REGULATION_OF_SECRETION	GOBP_NEGATIVE_REGULATION_OF_SECRETION		177	0.154143	2.39006	0	0.00688819	0.564	3378	tags=39%, list=24%, signal=50%
GOBP_PARASYMPATHETIC_NERVOUS_SYSTEM_DEVELOPMENT	GOBP_PARASYMPATHETIC_NERVOUS_SYSTEM_DEVELOPMENT		18	0.466779	2.38325	0.00196464	0.00721025	0.582	2850	tags=67%, list=20%, signal=83%
GOBP_RECOMBINATIONAL_REPAIR	GOBP_RECOMBINATIONAL_REPAIR		150	0.162698	2.37635	0	0.00746262	0.598	10793	tags=92%, list=76%, signal=378%
GOBP_NEGATIVE_REGULATION_OF_PROTEIN_MODIFICATION_PROCESS	GOBP_NEGATIVE_REGULATION_OF_PROTEIN_MODIFICATION_PROCESS		351	0.106896	2.37372	0	0.00754418	0.606	6660	tags=57%, list=47%, signal=105%
GOBP_NEURAL_TUBE_FORMATION	GOBP_NEURAL_TUBE_FORMATION		121	0.181107	2.3725	0	0.00752561	0.608	6025	tags=60%, list=42%, signal=104%
GOBP_VESICLE_ORGANIZATION	GOBP_VESICLE_ORGANIZATION		336	0.113733	2.36987	0.002079	0.00758988	0.612	7054	tags=61%, list=50%, signal=118%
GOBP_REGULATION_OF_DOUBLE_STRAND_BREAK_REPAIR	GOBP_REGULATION_OF_DOUBLE_STRAND_BREAK_REPAIR		121	0.182754	2.3638	0.00204082	0.00790422	0.632	10938	tags=95%, list=77%, signal=408%
GOBP_SENSORY_PERCEPTION_OF_MECHANICAL_STIMULUS	GOBP_SENSORY_PERCEPTION_OF_MECHANICAL_STIMULUS		164	0.158839	2.35756	0	0.00820778	0.649	2969	tags=37%, list=21%, signal=46%
GOBP_MITOTIC_CYTOKINETIC_PROCESS	GOBP_MITOTIC_CYTOKINETIC_PROCESS		34	0.347333	2.35439	0	0.00828948	0.654	5528	tags=74%, list=39%, signal=120%
GOBP_MORPHOGENESIS_OF_EMBRYONIC_EPITHELIUM	GOBP_MORPHOGENESIS_OF_EMBRYONIC_EPITHELIUM		169	0.15802	2.34439	0.00195695	0.00890531	0.686	6025	tags=58%, list=42%, signal=99%
GOBP_POSITIVE_REGULATION_OF_PROTEIN_LOCALIZATION_TO_PLASMA_MEMBRANE	GOBP_POSITIVE_REGULATION_OF_PROTEIN_LOCALIZATION_TO_PLASMA_MEMBRANE		61	0.254387	2.34158	0	0.00900484	0.694	5489	tags=64%, list=39%, signal=104%
GOBP_PROTEIN_CONTAINING_COMPLEX_LOCALIZATION	GOBP_PROTEIN_CONTAINING_COMPLEX_LOCALIZATION		231	0.132111	2.33913	0.004	0.00908815	0.701	7693	tags=67%, list=54%, signal=144%
GOBP_POSITIVE_REGULATION_OF_OSTEOBLAST_DIFFERENTIATION	GOBP_POSITIVE_REGULATION_OF_OSTEOBLAST_DIFFERENTIATION		71	0.23251	2.33743	0	0.00909971	0.703	5522	tags=62%, list=39%, signal=101%
GOBP_EPITHELIAL_CELL_PROLIFERATION	GOBP_EPITHELIAL_CELL_PROLIFERATION		472	0.0942978	2.33488	0	0.00918081	0.711	5813	tags=50%, list=41%, signal=82%
GOBP_EAR_DEVELOPMENT	GOBP_EAR_DEVELOPMENT		225	0.134812	2.33483	0.00396825	0.00912196	0.711	4243	tags=43%, list=30%, signal=60%
GOBP_LATE_ENDOSOME_TO_LYSOSOME_TRANSPORT	GOBP_LATE_ENDOSOME_TO_LYSOSOME_TRANSPORT		20	0.431794	2.33433	0	0.0091179	0.711	6666	tags=90%, list=47%, signal=169%
GOBP_REGULATION_OF_OSTEOBLAST_DIFFERENTIATION	GOBP_REGULATION_OF_OSTEOBLAST_DIFFERENTIATION		137	0.170617	2.33059	0	0.00937175	0.718	3409	tags=41%, list=24%, signal=53%
GOBP_LYSOSOMAL_TRANSPORT	GOBP_LYSOSOMAL_TRANSPORT		110	0.187259	2.32456	0	0.00974635	0.732	7182	tags=69%, list=51%, signal=139%
GOBP_NEGATIVE_REGULATION_OF_EPITHELIAL_TO_MESENCHYMAL_TRANSITION	GOBP_NEGATIVE_REGULATION_OF_EPITHELIAL_TO_MESENCHYMAL_TRANSITION		38	0.321821	2.32287	0	0.00979082	0.735	5539	tags=71%, list=39%, signal=116%
GOBP_RETINA_DEVELOPMENT_IN_CAMERA_TYPE_EYE	GOBP_RETINA_DEVELOPMENT_IN_CAMERA_TYPE_EYE		164	0.152731	2.31241	0	0.0104042	0.756	3922	tags=43%, list=28%, signal=58%
GOBP_ESTABLISHMENT_OF_ENDOTHELIAL_BARRIER	GOBP_ESTABLISHMENT_OF_ENDOTHELIAL_BARRIER		52	0.279694	2.30836	0	0.0106736	0.768	3420	tags=52%, list=24%, signal=68%
GOBP_RESPONSE_TO_STARVATION	GOBP_RESPONSE_TO_STARVATION		211	0.133482	2.30674	0	0.0107122	0.769	9317	tags=79%, list=66%, signal=225%
GOBP_INNERVATION	GOBP_INNERVATION		30	0.355333	2.30058	0.00204499	0.0111023	0.783	2541	tags=53%, list=18%, signal=65%
GOBP_EMBRYONIC_ORGAN_MORPHOGENESIS	GOBP_EMBRYONIC_ORGAN_MORPHOGENESIS		299	0.115953	2.29964	0	0.0111154	0.785	4758	tags=45%, list=33%, signal=66%
GOBP_SYNAPSE_ASSEMBLY	GOBP_SYNAPSE_ASSEMBLY		253	0.126225	2.29872	0	0.0110922	0.786	3632	tags=38%, list=26%, signal=50%
GOBP_REGULATION_OF_ORGANELLE_ASSEMBLY	GOBP_REGULATION_OF_ORGANELLE_ASSEMBLY		221	0.131508	2.29701	0	0.0111781	0.789	9998	tags=83%, list=70%, signal=276%
GOBP_ORGANELLE_MEMBRANE_FUSION	GOBP_ORGANELLE_MEMBRANE_FUSION		120	0.176457	2.29696	0	0.011119	0.79	7821	tags=73%, list=55%, signal=160%
GOBP_CYTOSKELETON_DEPENDENT_INTRACELLULAR_TRANSPORT	GOBP_CYTOSKELETON_DEPENDENT_INTRACELLULAR_TRANSPORT		174	0.148233	2.29362	0	0.0113309	0.796	5109	tags=51%, list=36%, signal=78%
GOBP_DENSE_CORE_GRANULE_LOCALIZATION	GOBP_DENSE_CORE_GRANULE_LOCALIZATION		24	0.393185	2.29308	0	0.0112996	0.797	2120	tags=54%, list=15%, signal=64%
GOBP_CEREBRAL_CORTEX_RADIALLY_ORIENTED_CELL_MIGRATION	GOBP_CEREBRAL_CORTEX_RADIALLY_ORIENTED_CELL_MIGRATION		35	0.32343	2.29231	0	0.0113044	0.801	5975	tags=74%, list=42%, signal=128%
GOBP_GLIOGENESIS	GOBP_GLIOGENESIS		359	0.104357	2.29038	0	0.0113787	0.807	8416	tags=69%, list=59%, signal=166%
GOBP_REGULATION_OF_NOTCH_SIGNALING_PATHWAY	GOBP_REGULATION_OF_NOTCH_SIGNALING_PATHWAY		85	0.21317	2.28738	0	0.0116254	0.817	4849	tags=55%, list=34%, signal=83%
GOBP_REGULATION_OF_ENDOTHELIAL_CELL_DIFFERENTIATION	GOBP_REGULATION_OF_ENDOTHELIAL_CELL_DIFFERENTIATION		42	0.305259	2.28575	0	0.0117109	0.82	5490	tags=69%, list=39%, signal=112%
GOBP_NEURON_REMODELING	GOBP_NEURON_REMODELING		15	0.495964	2.28568	0.0020202	0.011644	0.82	2434	tags=67%, list=17%, signal=80%
GOBP_ARTERY_DEVELOPMENT	GOBP_ARTERY_DEVELOPMENT		111	0.189355	2.28351	0	0.0117977	0.823	4758	tags=52%, list=33%, signal=78%
GOBP_TELENCEPHALON_GLIAL_CELL_MIGRATION	GOBP_TELENCEPHALON_GLIAL_CELL_MIGRATION		25	0.380445	2.27674	0	0.0122555	0.831	5975	tags=80%, list=42%, signal=138%
GOBP_RESPONSE_TO_STEM_CELL_FACTOR	GOBP_RESPONSE_TO_STEM_CELL_FACTOR		46	0.282949	2.27554	0	0.0122886	0.836	3717	tags=54%, list=26%, signal=73%
GOBP_POSITIVE_REGULATION_OF_STRESS_ACTIVATED_PROTEIN_KINASE_SIGNALING_CASCADE	GOBP_POSITIVE_REGULATION_OF_STRESS_ACTIVATED_PROTEIN_KINASE_SIGNALING_CASCADE		23	0.3903	2.2751	0	0.0122404	0.836	5587	tags=78%, list=39%, signal=129%
GOBP_REGULATION_OF_EPITHELIAL_CELL_PROLIFERATION	GOBP_REGULATION_OF_EPITHELIAL_CELL_PROLIFERATION		388	0.0986883	2.27261	0.00401606	0.0123397	0.838	4938	tags=44%, list=35%, signal=66%
GOBP_REGULATION_OF_CELL_SHAPE	GOBP_REGULATION_OF_CELL_SHAPE		126	0.174055	2.26581	0	0.0128228	0.856	3979	tags=45%, list=28%, signal=62%
GOBP_AMIDE_TRANSPORT	GOBP_AMIDE_TRANSPORT		347	0.104186	2.2621	0	0.0130757	0.862	2160	tags=25%, list=15%, signal=29%
GOBP_INCLUSION_BODY_ASSEMBLY	GOBP_INCLUSION_BODY_ASSEMBLY		26	0.373813	2.26022	0	0.0132028	0.866	5085	tags=73%, list=36%, signal=114%
GOBP_REGULATION_OF_MICROTUBULE_BASED_PROCESS	GOBP_REGULATION_OF_MICROTUBULE_BASED_PROCESS		222	0.13231	2.25711	0	0.0133936	0.87	6026	tags=55%, list=42%, signal=95%
GOBP_ACTION_POTENTIAL	GOBP_ACTION_POTENTIAL		159	0.156397	2.25645	0	0.0134393	0.872	1914	tags=29%, list=13%, signal=33%
GOBP_HINDBRAIN_MORPHOGENESIS	GOBP_HINDBRAIN_MORPHOGENESIS		50	0.268599	2.25392	0.00203666	0.0136259	0.878	9276	tags=92%, list=65%, signal=264%
GOBP_PRESYNAPSE_ORGANIZATION	GOBP_PRESYNAPSE_ORGANIZATION		55	0.252641	2.25135	0	0.0137978	0.883	4177	tags=55%, list=29%, signal=77%
GOBP_AUDITORY_RECEPTOR_CELL_MORPHOGENESIS	GOBP_AUDITORY_RECEPTOR_CELL_MORPHOGENESIS		21	0.414695	2.2467	0	0.0142101	0.888	3591	tags=67%, list=25%, signal=89%
GOBP_PROTEIN_LOCALIZATION_TO_CELL_JUNCTION	GOBP_PROTEIN_LOCALIZATION_TO_CELL_JUNCTION		128	0.170174	2.24612	0	0.014212	0.889	2267	tags=33%, list=16%, signal=39%
GOBP_PLASMA_MEMBRANE_ORGANIZATION	GOBP_PLASMA_MEMBRANE_ORGANIZATION		142	0.161713	2.24471	0	0.01427	0.892	7036	tags=65%, list=49%, signal=128%
GOBP_EPITHELIAL_TO_MESENCHYMAL_TRANSITION	GOBP_EPITHELIAL_TO_MESENCHYMAL_TRANSITION		162	0.152584	2.24174	0	0.0144979	0.896	6720	tags=62%, list=47%, signal=117%
GOBP_POSITIVE_REGULATION_OF_PROTEIN_LOCALIZATION_TO_CELL_PERIPHERY	GOBP_POSITIVE_REGULATION_OF_PROTEIN_LOCALIZATION_TO_CELL_PERIPHERY		70	0.230247	2.23968	0.00403226	0.0145861	0.898	6086	tags=66%, list=43%, signal=114%
GOBP_REGULATION_OF_VASCULOGENESIS	GOBP_REGULATION_OF_VASCULOGENESIS		16	0.462355	2.23902	0.00198413	0.0145726	0.9	4097	tags=75%, list=29%, signal=105%
GOBP_ADHERENS_JUNCTION_ORGANIZATION	GOBP_ADHERENS_JUNCTION_ORGANIZATION		52	0.255808	2.2364	0	0.0148149	0.907	2938	tags=46%, list=21%, signal=58%
GOBP_PLATELET_DERIVED_GROWTH_FACTOR_RECEPTOR_BETA_SIGNALING_PATHWAY	GOBP_PLATELET_DERIVED_GROWTH_FACTOR_RECEPTOR_BETA_SIGNALING_PATHWAY		56	0.257427	2.23546	0	0.0148621	0.91	3717	tags=52%, list=26%, signal=70%
GOBP_CELLULAR_RESPONSE_TO_STARVATION	GOBP_CELLULAR_RESPONSE_TO_STARVATION		177	0.143164	2.23309	0	0.0150626	0.914	9317	tags=80%, list=66%, signal=228%
GOBP_MICROVILLUS_ORGANIZATION	GOBP_MICROVILLUS_ORGANIZATION		24	0.377964	2.22848	0.0039604	0.0155253	0.923	1151	tags=46%, list=8%, signal=50%
GOBP_POSITIVE_REGULATION_OF_DOUBLE_STRAND_BREAK_REPAIR	GOBP_POSITIVE_REGULATION_OF_DOUBLE_STRAND_BREAK_REPAIR		84	0.208206	2.22635	0	0.0156473	0.924	10938	tags=98%, list=77%, signal=420%
GOBP_MUSCLE_CELL_PROLIFERATION	GOBP_MUSCLE_CELL_PROLIFERATION		260	0.120723	2.22596	0.00420168	0.0156171	0.924	5260	tags=49%, list=37%, signal=76%
GOBP_NUCLEAR_TRANSPORT	GOBP_NUCLEAR_TRANSPORT		324	0.107234	2.22593	0.00400802	0.0155451	0.924	8165	tags=68%, list=57%, signal=156%
GOBP_REGULATION_OF_MEMBRANE_POTENTIAL	GOBP_REGULATION_OF_MEMBRANE_POTENTIAL		412	0.0949089	2.22452	0.0019802	0.0156174	0.927	1933	tags=23%, list=14%, signal=26%
GOBP_COLUMNAR_CUBOIDAL_EPITHELIAL_CELL_DIFFERENTIATION	GOBP_COLUMNAR_CUBOIDAL_EPITHELIAL_CELL_DIFFERENTIATION		108	0.180285	2.21886	0.00395257	0.0161855	0.935	2590	tags=36%, list=18%, signal=44%
GOBP_METHYLATION	GOBP_METHYLATION		145	0.158794	2.21827	0.00196464	0.0161531	0.937	9631	tags=83%, list=68%, signal=256%
GOBP_PROTEIN_LOCALIZATION_TO_PLASMA_MEMBRANE	GOBP_PROTEIN_LOCALIZATION_TO_PLASMA_MEMBRANE		281	0.114146	2.21434	0	0.0165241	0.938	7821	tags=66%, list=55%, signal=144%
GOBP_SISTER_CHROMATID_SEGREGATION	GOBP_SISTER_CHROMATID_SEGREGATION		205	0.134415	2.21378	0	0.0165139	0.938	11018	tags=91%, list=77%, signal=397%
GOBP_ENDOTHELIAL_CELL_MORPHOGENESIS	GOBP_ENDOTHELIAL_CELL_MORPHOGENESIS		15	0.476892	2.21199	0	0.0166264	0.938	3653	tags=73%, list=26%, signal=99%
GOBP_PLASMA_MEMBRANE_REPAIR	GOBP_PLASMA_MEMBRANE_REPAIR		31	0.31986	2.20815	0	0.0170185	0.941	6470	tags=77%, list=45%, signal=142%
GOBP_CHROMOSOME_ORGANIZATION	GOBP_CHROMOSOME_ORGANIZATION		455	0.0901637	2.20712	0.00396825	0.0170067	0.942	11041	tags=86%, list=78%, signal=374%
GOBP_DORSAL_VENTRAL_PATTERN_FORMATION	GOBP_DORSAL_VENTRAL_PATTERN_FORMATION		85	0.204287	2.20299	0.00399202	0.0173589	0.946	8488	tags=80%, list=60%, signal=197%
GOBP_REGULATION_OF_NEUROGENESIS	GOBP_REGULATION_OF_NEUROGENESIS		412	0.095999	2.20251	0.00402414	0.0173449	0.947	4058	tags=38%, list=29%, signal=51%
GOBP_RESPONSE_TO_ENDOPLASMIC_RETICULUM_STRESS	GOBP_RESPONSE_TO_ENDOPLASMIC_RETICULUM_STRESS		261	0.117987	2.19945	0	0.017612	0.947	10121	tags=83%, list=71%, signal=282%
GOBP_VASCULAR_PROCESS_IN_CIRCULATORY_SYSTEM	GOBP_VASCULAR_PROCESS_IN_CIRCULATORY_SYSTEM		227	0.12575	2.19334	0.00194932	0.01824	0.954	3439	tags=37%, list=24%, signal=47%
GOBP_FOREBRAIN_CELL_MIGRATION	GOBP_FOREBRAIN_CELL_MIGRATION		61	0.238727	2.19279	0	0.0181999	0.954	6177	tags=67%, list=43%, signal=118%
GOBP_MEMBRANE_BIOGENESIS	GOBP_MEMBRANE_BIOGENESIS		65	0.233113	2.19243	0.00200803	0.0181654	0.954	5888	tags=65%, list=41%, signal=110%
GOBP_NEUROTRANSMITTER_SECRETION	GOBP_NEUROTRANSMITTER_SECRETION		156	0.151208	2.19136	0.00408998	0.0182039	0.955	6259	tags=59%, list=44%, signal=104%
GOBP_NEUROMUSCULAR_PROCESS	GOBP_NEUROMUSCULAR_PROCESS		181	0.139304	2.18768	0.00414938	0.0185329	0.958	3543	tags=39%, list=25%, signal=51%
GOBP_PROTEASOME_MEDIATED_UBIQUITIN_DEPENDENT_PROTEIN_CATABOLIC_PROCESS	GOBP_PROTEASOME_MEDIATED_UBIQUITIN_DEPENDENT_PROTEIN_CATABOLIC_PROCESS		397	0.0964611	2.18767	0	0.0184531	0.958	10988	tags=87%, list=77%, signal=371%
GOBP_REGULATION_OF_BICELLULAR_TIGHT_JUNCTION_ASSEMBLY	GOBP_REGULATION_OF_BICELLULAR_TIGHT_JUNCTION_ASSEMBLY		25	0.363807	2.18743	0	0.0184075	0.959	3367	tags=60%, list=24%, signal=78%
GOBP_REGULATION_OF_NERVOUS_SYSTEM_PROCESS	GOBP_REGULATION_OF_NERVOUS_SYSTEM_PROCESS		120	0.170161	2.18467	0	0.0187426	0.961	3762	tags=43%, list=26%, signal=58%
GOBP_REGULATION_OF_NEUROTRANSMITTER_SECRETION	GOBP_REGULATION_OF_NEUROTRANSMITTER_SECRETION		91	0.194243	2.18067	0.00203252	0.0191077	0.965	6162	tags=63%, list=43%, signal=110%
GOBP_HINDBRAIN_DEVELOPMENT	GOBP_HINDBRAIN_DEVELOPMENT		171	0.144996	2.17736	0	0.0194097	0.97	6694	tags=61%, list=47%, signal=115%
GOBP_NEUROTRANSMITTER_TRANSPORT	GOBP_NEUROTRANSMITTER_TRANSPORT		204	0.131762	2.17273	0.00395257	0.0199636	0.972	2753	tags=32%, list=19%, signal=40%
GOBP_VACUOLAR_TRANSPORT	GOBP_VACUOLAR_TRANSPORT		146	0.154678	2.16951	0.00608519	0.0203698	0.974	9413	tags=82%, list=66%, signal=239%
GOBP_REGULATION_OF_NEURONAL_SYNAPTIC_PLASTICITY	GOBP_REGULATION_OF_NEURONAL_SYNAPTIC_PLASTICITY		65	0.226539	2.16699	0.00604839	0.0206233	0.978	4012	tags=51%, list=28%, signal=70%
GOBP_REGULATION_OF_INSULIN_SECRETION	GOBP_REGULATION_OF_INSULIN_SECRETION		198	0.133645	2.16586	0.00208768	0.0207025	0.978	2147	tags=28%, list=15%, signal=33%
GOBP_ROOF_OF_MOUTH_DEVELOPMENT	GOBP_ROOF_OF_MOUTH_DEVELOPMENT		93	0.188209	2.16297	0.00204918	0.0209729	0.978	6209	tags=62%, list=44%, signal=110%
GOBP_NEGATIVE_REGULATION_OF_CELL_MIGRATION_INVOLVED_IN_SPROUTING_ANGIOGENESIS	GOBP_NEGATIVE_REGULATION_OF_CELL_MIGRATION_INVOLVED_IN_SPROUTING_ANGIOGENESIS		17	0.433399	2.16289	0.00413223	0.0209017	0.978	8064	tags=100%, list=57%, signal=231%
GOBP_PEPTIDE_TRANSPORT	GOBP_PEPTIDE_TRANSPORT		306	0.109481	2.16181	0.00204499	0.0209593	0.978	2147	tags=26%, list=15%, signal=30%
GOBP_AUTONOMIC_NERVOUS_SYSTEM_DEVELOPMENT	GOBP_AUTONOMIC_NERVOUS_SYSTEM_DEVELOPMENT		44	0.277654	2.16106	0.00204499	0.0209308	0.979	2850	tags=48%, list=20%, signal=60%
GOBP_CORTICAL_ACTIN_CYTOSKELETON_ORGANIZATION	GOBP_CORTICAL_ACTIN_CYTOSKELETON_ORGANIZATION		37	0.302255	2.15501	0	0.0216491	0.983	6858	tags=78%, list=48%, signal=151%
GOBP_RETROGRADE_TRANSPORT_ENDOSOME_TO_GOLGI	GOBP_RETROGRADE_TRANSPORT_ENDOSOME_TO_GOLGI		79	0.207395	2.15235	0.00206612	0.0218889	0.983	10927	tags=97%, list=77%, signal=418%
GOBP_SYNAPTIC_VESICLE_EXOCYTOSIS	GOBP_SYNAPTIC_VESICLE_EXOCYTOSIS		107	0.176948	2.15002	0.00421053	0.0220804	0.985	2552	tags=36%, list=18%, signal=43%
GOBP_NEGATIVE_REGULATION_OF_EPITHELIAL_CELL_DIFFERENTIATION	GOBP_NEGATIVE_REGULATION_OF_EPITHELIAL_CELL_DIFFERENTIATION		56	0.23906	2.14898	0	0.0221049	0.986	4739	tags=57%, list=33%, signal=85%
GOBP_IMPORT_INTO_NUCLEUS	GOBP_IMPORT_INTO_NUCLEUS		174	0.140137	2.14624	0	0.0223505	0.987	8165	tags=71%, list=57%, signal=165%
GOBP_BLOOD_VESSEL_REMODELING	GOBP_BLOOD_VESSEL_REMODELING		57	0.238928	2.14593	0.00198413	0.0223066	0.987	5846	tags=65%, list=41%, signal=110%
GOBP_NEGATIVE_REGULATION_OF_PLATELET_ACTIVATION	GOBP_NEGATIVE_REGULATION_OF_PLATELET_ACTIVATION		16	0.446599	2.14535	0.00385356	0.0222839	0.987	3432	tags=69%, list=24%, signal=91%
GOBP_RNA_MODIFICATION	GOBP_RNA_MODIFICATION		120	0.164549	2.14151	0	0.0227853	0.989	9174	tags=81%, list=65%, signal=226%
GOBP_ACTIN_FILAMENT_BUNDLE_ORGANIZATION	GOBP_ACTIN_FILAMENT_BUNDLE_ORGANIZATION		170	0.145313	2.13945	0	0.0229276	0.99	3311	tags=38%, list=23%, signal=48%
GOBP_SYNAPSE_MATURATION	GOBP_SYNAPSE_MATURATION		45	0.268728	2.13875	0	0.0229127	0.99	3142	tags=49%, list=22%, signal=63%
GOBP_RESPONSE_TO_MACROPHAGE_COLONY_STIMULATING_FACTOR	GOBP_RESPONSE_TO_MACROPHAGE_COLONY_STIMULATING_FACTOR		57	0.23692	2.13862	0.00394477	0.0228425	0.99	4128	tags=53%, list=29%, signal=74%
GOBP_UBIQUITIN_DEPENDENT_PROTEIN_CATABOLIC_PROCESS_VIA_THE_MULTIVESICULAR_BODY_SORTING_PATHWAY	GOBP_UBIQUITIN_DEPENDENT_PROTEIN_CATABOLIC_PROCESS_VIA_THE_MULTIVESICULAR_BODY_SORTING_PATHWAY		29	0.337038	2.13632	0	0.0231285	0.99	8456	tags=93%, list=59%, signal=229%
GOBP_NUCLEAR_CHROMOSOME_SEGREGATION	GOBP_NUCLEAR_CHROMOSOME_SEGREGATION		262	0.115475	2.13477	0.00203252	0.0232872	0.991	11034	tags=89%, list=78%, signal=390%
GOBP_GLIAL_CELL_DIFFERENTIATION	GOBP_GLIAL_CELL_DIFFERENTIATION		259	0.115036	2.13461	0.00584795	0.0232161	0.991	8386	tags=70%, list=59%, signal=168%
GOBP_REGULATION_OF_SYNAPSE_ASSEMBLY	GOBP_REGULATION_OF_SYNAPSE_ASSEMBLY		178	0.139119	2.13289	0.00200803	0.023363	0.991	5795	tags=54%, list=41%, signal=91%
GOBP_CANONICAL_WNT_SIGNALING_PATHWAY	GOBP_CANONICAL_WNT_SIGNALING_PATHWAY		287	0.10868	2.13081	0	0.0235577	0.992	7156	tags=61%, list=50%, signal=120%
GOBP_TRABECULA_MORPHOGENESIS	GOBP_TRABECULA_MORPHOGENESIS		52	0.24835	2.13076	0	0.0234619	0.992	5505	tags=63%, list=39%, signal=103%
GOBP_MEMBRANE_DOCKING	GOBP_MEMBRANE_DOCKING		75	0.210411	2.12821	0.00402414	0.0236793	0.994	9537	tags=88%, list=67%, signal=266%
GOBP_ESTABLISHMENT_OR_MAINTENANCE_OF_BIPOLAR_CELL_POLARITY	GOBP_ESTABLISHMENT_OR_MAINTENANCE_OF_BIPOLAR_CELL_POLARITY		40	0.283679	2.12805	0.00203252	0.023603	0.994	8064	tags=85%, list=57%, signal=196%
GOBP_POSITIVE_REGULATION_OF_PROTEIN_TRANSPORT	GOBP_POSITIVE_REGULATION_OF_PROTEIN_TRANSPORT		278	0.110257	2.12748	0	0.0235909	0.995	8488	tags=71%, list=60%, signal=171%
GOBP_MULTICELLULAR_ORGANISM_GROWTH	GOBP_MULTICELLULAR_ORGANISM_GROWTH		205	0.127191	2.12589	0	0.023766	0.995	5084	tags=48%, list=36%, signal=74%
GOBP_ACTIN_FILAMENT_ORGANIZATION	GOBP_ACTIN_FILAMENT_ORGANIZATION		404	0.0901393	2.1217	0.00196078	0.0243678	0.997	2696	tags=28%, list=19%, signal=33%
GOBP_GLIAL_CELL_FATE_COMMITMENT	GOBP_GLIAL_CELL_FATE_COMMITMENT		15	0.442818	2.12085	0.00201207	0.0244577	0.997	3189	tags=67%, list=22%, signal=86%
GOBP_REFLEX	GOBP_REFLEX		21	0.387274	2.11823	0.0020202	0.0248131	0.997	2626	tags=57%, list=18%, signal=70%
GOBP_RESPONSE_TO_CARBOHYDRATE	GOBP_RESPONSE_TO_CARBOHYDRATE		257	0.113917	2.11655	0	0.0249897	0.997	1673	tags=23%, list=12%, signal=26%
GOBP_POSITIVE_REGULATION_OF_BIOMINERAL_TISSUE_DEVELOPMENT	GOBP_POSITIVE_REGULATION_OF_BIOMINERAL_TISSUE_DEVELOPMENT		51	0.244428	2.11347	0.00204082	0.0253971	0.998	2670	tags=43%, list=19%, signal=53%
GOBP_ENDOTHELIAL_CELL_PROLIFERATION	GOBP_ENDOTHELIAL_CELL_PROLIFERATION		153	0.148226	2.11292	0.00408163	0.0253776	0.998	8138	tags=72%, list=57%, signal=166%
GOBP_REGULATION_OF_CANONICAL_WNT_SIGNALING_PATHWAY	GOBP_REGULATION_OF_CANONICAL_WNT_SIGNALING_PATHWAY		233	0.121031	2.11244	0.00202429	0.0253685	0.998	7156	tags=62%, list=50%, signal=123%
GOBP_CELL_JUNCTION_DISASSEMBLY	GOBP_CELL_JUNCTION_DISASSEMBLY		32	0.319889	2.11066	0.00840336	0.0255741	0.998	3015	tags=53%, list=21%, signal=67%
GOBP_NEGATIVE_REGULATION_OF_PHOSPHORYLATION	GOBP_NEGATIVE_REGULATION_OF_PHOSPHORYLATION		279	0.108401	2.10802	0.00203666	0.02582	0.999	6796	tags=58%, list=48%, signal=110%
GOBP_POSITIVE_REGULATION_OF_PROTEIN_LOCALIZATION_TO_MEMBRANE	GOBP_POSITIVE_REGULATION_OF_PROTEIN_LOCALIZATION_TO_MEMBRANE		104	0.177644	2.10723	0	0.0259063	0.999	3918	tags=45%, list=28%, signal=62%
GOBP_CEREBRAL_CORTEX_CELL_MIGRATION	GOBP_CEREBRAL_CORTEX_CELL_MIGRATION		48	0.253929	2.10591	0	0.0260244	0.999	6177	tags=69%, list=43%, signal=121%
GOBP_POSITIVE_REGULATION_OF_PROTEIN_LOCALIZATION	GOBP_POSITIVE_REGULATION_OF_PROTEIN_LOCALIZATION		487	0.0817357	2.10412	0.00402414	0.0262196	0.999	7374	tags=60%, list=52%, signal=120%
GOBP_REGULATION_OF_MODIFICATION_OF_SYNAPTIC_STRUCTURE	GOBP_REGULATION_OF_MODIFICATION_OF_SYNAPTIC_STRUCTURE		30	0.314476	2.10392	0.003861	0.0261607	0.999	5965	tags=73%, list=42%, signal=126%
GOBP_MULTIVESICULAR_BODY_SORTING_PATHWAY	GOBP_MULTIVESICULAR_BODY_SORTING_PATHWAY		34	0.304303	2.10285	0.002	0.0262441	0.999	6975	tags=79%, list=49%, signal=155%
GOBP_OLIGOSACCHARIDE_METABOLIC_PROCESS	GOBP_OLIGOSACCHARIDE_METABOLIC_PROCESS		42	0.270321	2.09929	0.00194932	0.026768	0.999	4631	tags=60%, list=33%, signal=88%
GOBP_REGULATION_OF_MRNA_METABOLIC_PROCESS	GOBP_REGULATION_OF_MRNA_METABOLIC_PROCESS		263	0.112155	2.09826	0.00215517	0.0268532	0.999	10005	tags=81%, list=70%, signal=269%
GOBP_MACROMOLECULE_METHYLATION	GOBP_MACROMOLECULE_METHYLATION		86	0.19374	2.09742	0.00206186	0.0269063	0.999	8505	tags=79%, list=60%, signal=196%
GOBP_NEUROMUSCULAR_SYNAPTIC_TRANSMISSION	GOBP_NEUROMUSCULAR_SYNAPTIC_TRANSMISSION		27	0.347481	2.09659	0.00378072	0.0269365	0.999	1914	tags=48%, list=13%, signal=56%
GOBP_REGULATION_OF_CELL_MIGRATION_INVOLVED_IN_SPROUTING_ANGIOGENESIS	GOBP_REGULATION_OF_CELL_MIGRATION_INVOLVED_IN_SPROUTING_ANGIOGENESIS		39	0.279802	2.0939	0.00430108	0.0272481	1	8064	tags=85%, list=57%, signal=195%
GOBP_POSITIVE_REGULATION_OF_NEUROGENESIS	GOBP_POSITIVE_REGULATION_OF_NEUROGENESIS		281	0.108835	2.09384	0	0.0271517	1	5314	tags=48%, list=37%, signal=75%
GOBP_ENDOCARDIAL_CUSHION_MORPHOGENESIS	GOBP_ENDOCARDIAL_CUSHION_MORPHOGENESIS		40	0.282235	2.0923	0.00200401	0.0273141	1	8440	tags=88%, list=59%, signal=215%
GOBP_SECRETORY_GRANULE_LOCALIZATION	GOBP_SECRETORY_GRANULE_LOCALIZATION		30	0.318192	2.08897	0	0.0277281	1	2120	tags=47%, list=15%, signal=55%
GOBP_REGULATION_OF_VASCULAR_ENDOTHELIAL_GROWTH_FACTOR_RECEPTOR_SIGNALING_PATHWAY	GOBP_REGULATION_OF_VASCULAR_ENDOTHELIAL_GROWTH_FACTOR_RECEPTOR_SIGNALING_PATHWAY		33	0.308855	2.08838	0.00424628	0.0277378	1	2512	tags=48%, list=18%, signal=59%
GOBP_POSTSYNAPTIC_MEMBRANE_ORGANIZATION	GOBP_POSTSYNAPTIC_MEMBRANE_ORGANIZATION		49	0.252193	2.08801	0.00199203	0.0277378	1	6873	tags=73%, list=48%, signal=142%
GOBP_CELLULAR_RESPONSE_TO_TOPOLOGICALLY_INCORRECT_PROTEIN	GOBP_CELLULAR_RESPONSE_TO_TOPOLOGICALLY_INCORRECT_PROTEIN		104	0.174906	2.08481	0.00201613	0.0283106	1	9563	tags=85%, list=67%, signal=256%
GOBP_NEGATIVE_REGULATION_OF_VASCULATURE_DEVELOPMENT	GOBP_NEGATIVE_REGULATION_OF_VASCULATURE_DEVELOPMENT		103	0.176059	2.08311	0.00847458	0.0284874	1	4831	tags=51%, list=34%, signal=77%
GOBP_NEGATIVE_REGULATION_OF_WNT_SIGNALING_PATHWAY	GOBP_NEGATIVE_REGULATION_OF_WNT_SIGNALING_PATHWAY		150	0.147816	2.08238	0	0.0285248	1	5314	tags=52%, list=37%, signal=82%
GOBP_NEURON_MATURATION	GOBP_NEURON_MATURATION		60	0.227842	2.07907	0.0020202	0.0289679	1	3409	tags=47%, list=24%, signal=61%
GOBP_POSITIVE_REGULATION_OF_NEUROTRANSMITTER_TRANSPORT	GOBP_POSITIVE_REGULATION_OF_NEUROTRANSMITTER_TRANSPORT		25	0.34461	2.07853	0	0.0289588	1	1933	tags=48%, list=14%, signal=55%
GOBP_MYOBLAST_FUSION	GOBP_MYOBLAST_FUSION		45	0.257169	2.07812	0.00785855	0.0288982	1	5202	tags=62%, list=37%, signal=98%
GOBP_TRANSMISSION_OF_NERVE_IMPULSE	GOBP_TRANSMISSION_OF_NERVE_IMPULSE		81	0.199811	2.07363	0.00398406	0.0295768	1	1914	tags=33%, list=13%, signal=38%
GOBP_ZINC_ION_TRANSPORT	GOBP_ZINC_ION_TRANSPORT		31	0.313308	2.07014	0	0.0300957	1	4728	tags=65%, list=33%, signal=96%
GOBP_POSITIVE_REGULATION_OF_BONE_MINERALIZATION	GOBP_POSITIVE_REGULATION_OF_BONE_MINERALIZATION		44	0.267552	2.06883	0.00197239	0.0302105	1	2670	tags=45%, list=19%, signal=56%
GOBP_NEGATIVE_REGULATION_OF_PROTEIN_LOCALIZATION	GOBP_NEGATIVE_REGULATION_OF_PROTEIN_LOCALIZATION		225	0.119643	2.0661	0.00608519	0.0306509	1	8690	tags=73%, list=61%, signal=184%
GOBP_METENCEPHALON_DEVELOPMENT	GOBP_METENCEPHALON_DEVELOPMENT		124	0.15862	2.06462	0.00215983	0.0308307	1	8314	tags=74%, list=58%, signal=177%
GOBP_SENSORY_PERCEPTION_OF_CHEMICAL_STIMULUS	GOBP_SENSORY_PERCEPTION_OF_CHEMICAL_STIMULUS		50	0.249559	2.06205	0.0104167	0.031214	1	3573	tags=50%, list=25%, signal=67%
GOBP_ESTABLISHMENT_OF_MITOCHONDRION_LOCALIZATION	GOBP_ESTABLISHMENT_OF_MITOCHONDRION_LOCALIZATION		28	0.323537	2.06048	0	0.0313027	1	5057	tags=68%, list=36%, signal=105%
GOBP_ANTIGEN_PROCESSING_AND_PRESENTATION_OF_PEPTIDE_ANTIGEN_VIA_MHC_CLASS_I	GOBP_ANTIGEN_PROCESSING_AND_PRESENTATION_OF_PEPTIDE_ANTIGEN_VIA_MHC_CLASS_I		38	0.288412	2.05742	0.00595238	0.0317383	1	1522	tags=39%, list=11%, signal=44%
GOBP_POSITIVE_REGULATION_OF_MRNA_METABOLIC_PROCESS	GOBP_POSITIVE_REGULATION_OF_MRNA_METABOLIC_PROCESS		117	0.161647	2.05717	0.00203666	0.0316786	1	9023	tags=79%, list=63%, signal=216%
GOBP_PHOTORECEPTOR_CELL_DIFFERENTIATION	GOBP_PHOTORECEPTOR_CELL_DIFFERENTIATION		67	0.215248	2.05668	0.00390625	0.0316854	1	4169	tags=51%, list=29%, signal=71%
GOBP_POSITIVE_REGULATION_OF_NEUROTRANSMITTER_SECRETION	GOBP_POSITIVE_REGULATION_OF_NEUROTRANSMITTER_SECRETION		21	0.375989	2.05655	0.00383142	0.0316181	1	5495	tags=76%, list=39%, signal=124%
GOBP_REGULATION_OF_CALCIUM_ION_DEPENDENT_EXOCYTOSIS	GOBP_REGULATION_OF_CALCIUM_ION_DEPENDENT_EXOCYTOSIS		44	0.25947	2.05288	0.00394477	0.0322357	1	3431	tags=50%, list=24%, signal=66%
GOBP_EPITHELIAL_CELL_MORPHOGENESIS	GOBP_EPITHELIAL_CELL_MORPHOGENESIS		45	0.262939	2.05266	0.00376648	0.0321546	1	2276	tags=42%, list=16%, signal=50%
GOBP_POSITIVE_REGULATION_OF_MAPK_CASCADE	GOBP_POSITIVE_REGULATION_OF_MAPK_CASCADE		450	0.0857123	2.05164	0	0.0322091	1	3717	tags=34%, list=26%, signal=45%
GOBP_EMBRYONIC_HEART_TUBE_DEVELOPMENT	GOBP_EMBRYONIC_HEART_TUBE_DEVELOPMENT		83	0.19495	2.05013	0.00583658	0.0324142	1	5981	tags=61%, list=42%, signal=105%
GOBP_REGULATION_OF_NEURON_MIGRATION	GOBP_REGULATION_OF_NEURON_MIGRATION		51	0.244677	2.04973	0.00400802	0.0323779	1	3503	tags=49%, list=25%, signal=65%
GOBP_AUTOPHAGOSOME_ORGANIZATION	GOBP_AUTOPHAGOSOME_ORGANIZATION		124	0.160723	2.04902	0.00390625	0.0323864	1	10234	tags=88%, list=72%, signal=311%
GOBP_ENDOSOME_TO_LYSOSOME_TRANSPORT_VIA_MULTIVESICULAR_BODY_SORTING_PATHWAY	GOBP_ENDOSOME_TO_LYSOSOME_TRANSPORT_VIA_MULTIVESICULAR_BODY_SORTING_PATHWAY		16	0.4272	2.04774	0.00614754	0.0325295	1	6374	tags=88%, list=45%, signal=158%
GOBP_CELL_SURFACE_RECEPTOR_PROTEIN_SERINE_THREONINE_KINASE_SIGNALING_PATHWAY	GOBP_CELL_SURFACE_RECEPTOR_PROTEIN_SERINE_THREONINE_KINASE_SIGNALING_PATHWAY		336	0.0972497	2.04756	0.00635593	0.032453	1	6648	tags=56%, list=47%, signal=103%
GOBP_HORMONE_TRANSPORT	GOBP_HORMONE_TRANSPORT		348	0.0984924	2.04596	0.00404858	0.0326537	1	2147	tags=25%, list=15%, signal=28%
GOBP_REGULATION_OF_WNT_SIGNALING_PATHWAY	GOBP_REGULATION_OF_WNT_SIGNALING_PATHWAY		297	0.101544	2.04096	0	0.0335023	1	7156	tags=60%, list=50%, signal=119%
GOBP_NEGATIVE_REGULATION_OF_PROTEIN_SECRETION	GOBP_NEGATIVE_REGULATION_OF_PROTEIN_SECRETION		85	0.191545	2.03915	0	0.0337384	1	5322	tags=56%, list=37%, signal=90%
GOBP_MORPHOGENESIS_OF_A_POLARIZED_EPITHELIUM	GOBP_MORPHOGENESIS_OF_A_POLARIZED_EPITHELIUM		56	0.22708	2.03876	0.00588235	0.0337103	1	8210	tags=80%, list=58%, signal=189%
GOBP_MICROTUBULE_NUCLEATION	GOBP_MICROTUBULE_NUCLEATION		38	0.274565	2.03446	0.0115607	0.034384	1	5835	tags=68%, list=41%, signal=116%
GOBP_REGULATION_OF_EPITHELIAL_TO_MESENCHYMAL_TRANSITION	GOBP_REGULATION_OF_EPITHELIAL_TO_MESENCHYMAL_TRANSITION		103	0.169826	2.03337	0.00383142	0.0344973	1	4919	tags=51%, list=35%, signal=78%
GOBP_TISSUE_HOMEOSTASIS	GOBP_TISSUE_HOMEOSTASIS		262	0.108955	2.03185	0.00199601	0.0347015	1	2549	tags=29%, list=18%, signal=34%
GOBP_SKELETAL_SYSTEM_MORPHOGENESIS	GOBP_SKELETAL_SYSTEM_MORPHOGENESIS		236	0.114924	2.0302	0.00194932	0.0349972	1	5201	tags=48%, list=37%, signal=74%
GOBP_GLIAL_CELL_MIGRATION	GOBP_GLIAL_CELL_MIGRATION		70	0.209378	2.03003	0.00821355	0.0349031	1	5975	tags=63%, list=42%, signal=108%
GOBP_POSITIVE_REGULATION_OF_ENDOTHELIAL_CELL_MIGRATION	GOBP_POSITIVE_REGULATION_OF_ENDOTHELIAL_CELL_MIGRATION		106	0.16943	2.02919	0	0.0350282	1	4718	tags=50%, list=33%, signal=74%
GOBP_CALCIUM_ION_REGULATED_EXOCYTOSIS	GOBP_CALCIUM_ION_REGULATED_EXOCYTOSIS		66	0.212378	2.02903	0.0100604	0.0349425	1	2595	tags=39%, list=18%, signal=48%
GOBP_CERAMIDE_METABOLIC_PROCESS	GOBP_CERAMIDE_METABOLIC_PROCESS		90	0.180575	2.02814	0	0.0350207	1	7402	tags=70%, list=52%, signal=145%
GOBP_DENDRITE_DEVELOPMENT	GOBP_DENDRITE_DEVELOPMENT		297	0.100963	2.02503	0.00604839	0.0355565	1	3142	tags=32%, list=22%, signal=40%
GOBP_MEMBRANE_INVAGINATION	GOBP_MEMBRANE_INVAGINATION		68	0.20183	2.022	0.00193798	0.0361222	1	4253	tags=50%, list=30%, signal=71%
GOBP_GASTRULATION_WITH_MOUTH_FORMING_SECOND	GOBP_GASTRULATION_WITH_MOUTH_FORMING_SECOND		28	0.327501	2.02159	0.00204082	0.0361075	1	8556	tags=93%, list=60%, signal=233%
GOBP_REGULATION_OF_KINASE_ACTIVITY	GOBP_REGULATION_OF_KINASE_ACTIVITY		438	0.0839445	2.02067	0.00806452	0.0361541	1	8485	tags=68%, list=60%, signal=163%
GOBP_NEURON_PROJECTION_ORGANIZATION	GOBP_NEURON_PROJECTION_ORGANIZATION		111	0.162311	2.01836	0.00214133	0.0364661	1	4499	tags=48%, list=32%, signal=69%
GOBP_CEREBELLAR_CORTEX_MORPHOGENESIS	GOBP_CEREBELLAR_CORTEX_MORPHOGENESIS		39	0.270469	2.01593	0	0.0368531	1	8561	tags=87%, list=60%, signal=218%
GOBP_NEGATIVE_REGULATION_OF_CATALYTIC_ACTIVITY	GOBP_NEGATIVE_REGULATION_OF_CATALYTIC_ACTIVITY		299	0.102802	2.01469	0.00397614	0.0370146	1	6796	tags=58%, list=48%, signal=108%
GOBP_REGULATION_OF_NEUROTRANSMITTER_TRANSPORT	GOBP_REGULATION_OF_NEUROTRANSMITTER_TRANSPORT		109	0.165255	2.01301	0.00411523	0.0372543	1	5495	tags=55%, list=39%, signal=89%
GOBP_NEURAL_PRECURSOR_CELL_PROLIFERATION	GOBP_NEURAL_PRECURSOR_CELL_PROLIFERATION		195	0.122183	2.01198	0.00408998	0.0373454	1	6672	tags=59%, list=47%, signal=110%
GOBP_ESTABLISHMENT_OF_BLOOD_BRAIN_BARRIER	GOBP_ESTABLISHMENT_OF_BLOOD_BRAIN_BARRIER		17	0.403366	2.01086	0.00570342	0.0375066	1	5981	tags=82%, list=42%, signal=142%
GOBP_ORGANELLE_TRANSPORT_ALONG_MICROTUBULE	GOBP_ORGANELLE_TRANSPORT_ALONG_MICROTUBULE		72	0.201826	2.01024	0.00617284	0.0375365	1	6229	tags=64%, list=44%, signal=113%
GOBP_NUCLEIC_ACID_CATABOLIC_PROCESS	GOBP_NUCLEIC_ACID_CATABOLIC_PROCESS		280	0.101579	2.00751	0	0.0380058	1	10366	tags=83%, list=73%, signal=300%
GOBP_VESICLE_MEDIATED_TRANSPORT_TO_THE_PLASMA_MEMBRANE	GOBP_VESICLE_MEDIATED_TRANSPORT_TO_THE_PLASMA_MEMBRANE		142	0.143409	2.00712	0.00202429	0.0380302	1	7494	tags=67%, list=53%, signal=140%
GOBP_POSITIVE_REGULATION_OF_PROTEIN_SECRETION	GOBP_POSITIVE_REGULATION_OF_PROTEIN_SECRETION		170	0.133459	2.00327	0.00410678	0.0388372	1	8915	tags=76%, list=63%, signal=201%
GOBP_PLATELET_DERIVED_GROWTH_FACTOR_RECEPTOR_ALPHA_SIGNALING_PATHWAY	GOBP_PLATELET_DERIVED_GROWTH_FACTOR_RECEPTOR_ALPHA_SIGNALING_PATHWAY		50	0.239397	2.00317	0	0.0387516	1	3717	tags=50%, list=26%, signal=67%
GOBP_REGULATION_OF_CELL_MORPHOGENESIS	GOBP_REGULATION_OF_CELL_MORPHOGENESIS		251	0.108193	2.00236	0.00409836	0.0387955	1	3870	tags=38%, list=27%, signal=51%
GOBP_CYTOSKELETON_DEPENDENT_CYTOKINESIS	GOBP_CYTOSKELETON_DEPENDENT_CYTOKINESIS		96	0.173332	2.00047	0.00596422	0.0391927	1	5550	tags=56%, list=39%, signal=92%
GOBP_ENDOCARDIAL_CUSHION_DEVELOPMENT	GOBP_ENDOCARDIAL_CUSHION_DEVELOPMENT		51	0.232481	1.99948	0.00196464	0.0393012	1	8695	tags=84%, list=61%, signal=216%
GOBP_PANCREAS_DEVELOPMENT	GOBP_PANCREAS_DEVELOPMENT		81	0.18842	1.99859	0.00396825	0.0394006	1	5762	tags=59%, list=41%, signal=99%
GOBP_DENDRITE_MORPHOGENESIS	GOBP_DENDRITE_MORPHOGENESIS		176	0.130144	1.99566	0.00612245	0.0400363	1	3100	tags=35%, list=22%, signal=44%
GOBP_FIBROBLAST_GROWTH_FACTOR_RECEPTOR_SIGNALING_PATHWAY	GOBP_FIBROBLAST_GROWTH_FACTOR_RECEPTOR_SIGNALING_PATHWAY		113	0.160021	1.99414	0.00193798	0.0402859	1	4789	tags=50%, list=34%, signal=74%
GOBP_NEGATIVE_REGULATION_OF_PHOSPHORUS_METABOLIC_PROCESS	GOBP_NEGATIVE_REGULATION_OF_PHOSPHORUS_METABOLIC_PROCESS		325	0.0971385	1.9938	0.00389864	0.0402481	1	5519	tags=48%, list=39%, signal=77%
GOBP_PATTERN_SPECIFICATION_PROCESS	GOBP_PATTERN_SPECIFICATION_PROCESS		410	0.0883283	1.9936	0.00606061	0.0401816	1	8491	tags=68%, list=60%, signal=165%
GOBP_EXOCYTOSIS	GOBP_EXOCYTOSIS		346	0.095619	1.99324	0.0038835	0.0401445	1	6276	tags=53%, list=44%, signal=93%
GOBP_EPITHELIAL_TUBE_BRANCHING_INVOLVED_IN_LUNG_MORPHOGENESIS	GOBP_EPITHELIAL_TUBE_BRANCHING_INVOLVED_IN_LUNG_MORPHOGENESIS		39	0.270486	1.99161	0.00198413	0.0404263	1	5279	tags=64%, list=37%, signal=102%
GOBP_CRANIAL_NERVE_MORPHOGENESIS	GOBP_CRANIAL_NERVE_MORPHOGENESIS		30	0.309957	1.99008	0.00208768	0.0407428	1	4133	tags=60%, list=29%, signal=84%
GOBP_POSITIVE_REGULATION_OF_PROTEIN_CATABOLIC_PROCESS	GOBP_POSITIVE_REGULATION_OF_PROTEIN_CATABOLIC_PROCESS		188	0.12197	1.99005	0.0107759	0.040633	1	8348	tags=71%, list=59%, signal=169%
GOBP_RESPONSE_TO_MURAMYL_DIPEPTIDE	GOBP_RESPONSE_TO_MURAMYL_DIPEPTIDE		18	0.390602	1.98629	0.00399202	0.0414871	1	4722	tags=72%, list=33%, signal=108%
GOBP_POSITIVE_REGULATION_OF_CELLULAR_COMPONENT_BIOGENESIS	GOBP_POSITIVE_REGULATION_OF_CELLULAR_COMPONENT_BIOGENESIS		482	0.0785792	1.98581	0.0020202	0.0414961	1	6738	tags=55%, list=47%, signal=101%
GOBP_CAMERA_TYPE_EYE_MORPHOGENESIS	GOBP_CAMERA_TYPE_EYE_MORPHOGENESIS		132	0.151524	1.985	0.0163265	0.0415015	1	4436	tags=46%, list=31%, signal=67%
GOBP_EXOCYTIC_PROCESS	GOBP_EXOCYTIC_PROCESS		97	0.170427	1.98413	0.00607287	0.0415635	1	3163	tags=39%, list=22%, signal=50%
GOBP_REGULATION_OF_PEPTIDE_TRANSPORT	GOBP_REGULATION_OF_PEPTIDE_TRANSPORT		239	0.110222	1.98372	0.00385356	0.0415304	1	2147	tags=26%, list=15%, signal=30%
GOBP_RHO_PROTEIN_SIGNAL_TRANSDUCTION	GOBP_RHO_PROTEIN_SIGNAL_TRANSDUCTION		125	0.153841	1.98332	0.00572519	0.0414867	1	4429	tags=46%, list=31%, signal=67%
GOBP_WNT_SIGNALING_PATHWAY	GOBP_WNT_SIGNALING_PATHWAY		415	0.0872275	1.9825	0.00194553	0.0415514	1	7156	tags=59%, list=50%, signal=115%
GOBP_HIPPO_SIGNALING	GOBP_HIPPO_SIGNALING		51	0.232927	1.9819	0.00808081	0.0415672	1	8131	tags=80%, list=57%, signal=187%
GOBP_MESENCHYMAL_CELL_DIFFERENTIATION	GOBP_MESENCHYMAL_CELL_DIFFERENTIATION		242	0.108846	1.98004	0.00211416	0.0419668	1	4824	tags=45%, list=34%, signal=66%
GOBP_REGULATION_OF_SMALL_GTPASE_MEDIATED_SIGNAL_TRANSDUCTION	GOBP_REGULATION_OF_SMALL_GTPASE_MEDIATED_SIGNAL_TRANSDUCTION		226	0.112096	1.97998	0.00184843	0.0418565	1	4471	tags=42%, list=31%, signal=61%
GOBP_GLYCOSPHINGOLIPID_METABOLIC_PROCESS	GOBP_GLYCOSPHINGOLIPID_METABOLIC_PROCESS		50	0.236363	1.97895	0.00407332	0.0419858	1	3760	tags=50%, list=26%, signal=68%
GOBP_BONE_MINERALIZATION	GOBP_BONE_MINERALIZATION		126	0.14739	1.97873	0.0101626	0.0419345	1	2549	tags=33%, list=18%, signal=39%
GOBP_REGULATION_OF_EMBRYONIC_DEVELOPMENT	GOBP_REGULATION_OF_EMBRYONIC_DEVELOPMENT		81	0.185932	1.97742	0	0.0420785	1	7904	tags=74%, list=56%, signal=166%
GOBP_NEGATIVE_REGULATION_OF_PHOSPHATIDYLINOSITOL_3_KINASE_PROTEIN_KINASE_B_SIGNAL_TRANSDUCTION	GOBP_NEGATIVE_REGULATION_OF_PHOSPHATIDYLINOSITOL_3_KINASE_PROTEIN_KINASE_B_SIGNAL_TRANSDUCTION		59	0.208414	1.97685	0.00990099	0.0421097	1	8135	tags=78%, list=57%, signal=181%
GOBP_AMINO_ACID_ACTIVATION	GOBP_AMINO_ACID_ACTIVATION		25	0.331736	1.97658	0.0106383	0.0420622	1	8373	tags=92%, list=59%, signal=223%
GOBP_HEART_TRABECULA_MORPHOGENESIS	GOBP_HEART_TRABECULA_MORPHOGENESIS		32	0.287767	1.97594	0.00398406	0.0420755	1	4804	tags=63%, list=34%, signal=94%
GOBP_ENDOCARDIAL_CUSHION_FORMATION	GOBP_ENDOCARDIAL_CUSHION_FORMATION		30	0.307089	1.97531	0.00206186	0.0421231	1	8440	tags=90%, list=59%, signal=221%
GOBP_AMYLOID_BETA_FORMATION	GOBP_AMYLOID_BETA_FORMATION		44	0.252148	1.97419	0.011811	0.0423061	1	3858	tags=52%, list=27%, signal=72%
GOBP_COCHLEA_DEVELOPMENT	GOBP_COCHLEA_DEVELOPMENT		56	0.223626	1.9729	0.002079	0.0425227	1	3180	tags=45%, list=22%, signal=57%
GOBP_NEGATIVE_REGULATION_OF_KINASE_ACTIVITY	GOBP_NEGATIVE_REGULATION_OF_KINASE_ACTIVITY		164	0.135655	1.9722	0.00934579	0.0425588	1	8411	tags=73%, list=59%, signal=176%
GOBP_RECEPTOR_MEDIATED_ENDOCYTOSIS	GOBP_RECEPTOR_MEDIATED_ENDOCYTOSIS		264	0.103198	1.97161	0.00619835	0.0426287	1	3299	tags=33%, list=23%, signal=43%
GOBP_MIDBODY_ABSCISSION	GOBP_MIDBODY_ABSCISSION		20	0.361718	1.97004	0.00803213	0.0429265	1	5528	tags=75%, list=39%, signal=123%
GOBP_REGULATION_OF_SYNAPTIC_PLASTICITY	GOBP_REGULATION_OF_SYNAPTIC_PLASTICITY		221	0.114979	1.96984	0.00578035	0.0428477	1	4245	tags=41%, list=30%, signal=58%
GOBP_EYE_MORPHOGENESIS	GOBP_EYE_MORPHOGENESIS		163	0.131218	1.96877	0.00392157	0.042983	1	4436	tags=44%, list=31%, signal=63%
GOBP_PROTEIN_POLYUBIQUITINATION	GOBP_PROTEIN_POLYUBIQUITINATION		241	0.108711	1.96795	0.00568182	0.0430542	1	11107	tags=89%, list=78%, signal=399%
GOBP_ORGANELLE_FUSION	GOBP_ORGANELLE_FUSION		162	0.133226	1.96786	0.0113852	0.0429657	1	7870	tags=69%, list=55%, signal=152%
GOBP_NOREPINEPHRINE_SECRETION	GOBP_NOREPINEPHRINE_SECRETION		17	0.39305	1.96718	0.00804829	0.0429862	1	5291	tags=76%, list=37%, signal=122%
GOBP_REGULATION_OF_MICROTUBULE_CYTOSKELETON_ORGANIZATION	GOBP_REGULATION_OF_MICROTUBULE_CYTOSKELETON_ORGANIZATION		142	0.141294	1.96682	0.00197239	0.0429252	1	6322	tags=58%, list=44%, signal=104%
GOBP_ESTABLISHMENT_OF_CELL_POLARITY	GOBP_ESTABLISHMENT_OF_CELL_POLARITY		144	0.143467	1.96639	0.0160966	0.0429359	1	6275	tags=58%, list=44%, signal=103%
GOBP_NEGATIVE_REGULATION_OF_TOR_SIGNALING	GOBP_NEGATIVE_REGULATION_OF_TOR_SIGNALING		61	0.211376	1.96589	0.0021322	0.0429178	1	9595	tags=89%, list=67%, signal=271%
GOBP_MITOTIC_CYTOKINESIS	GOBP_MITOTIC_CYTOKINESIS		86	0.180521	1.96475	0.00619835	0.0431282	1	5550	tags=57%, list=39%, signal=93%
GOBP_POSITIVE_REGULATION_OF_BMP_SIGNALING_PATHWAY	GOBP_POSITIVE_REGULATION_OF_BMP_SIGNALING_PATHWAY		35	0.275094	1.96475	0.00784314	0.0430116	1	7067	tags=77%, list=50%, signal=153%
GOBP_MICROVILLUS_ASSEMBLY	GOBP_MICROVILLUS_ASSEMBLY		18	0.381649	1.96327	0.0060241	0.0432428	1	2479	tags=56%, list=17%, signal=67%
GOBP_POSITIVE_REGULATION_OF_INFLAMMASOME_MEDIATED_SIGNALING_PATHWAY	GOBP_POSITIVE_REGULATION_OF_INFLAMMASOME_MEDIATED_SIGNALING_PATHWAY		26	0.320682	1.9631	0.00197239	0.0431852	1	8574	tags=92%, list=60%, signal=232%
GOBP_SYNAPTIC_VESICLE_CLUSTERING	GOBP_SYNAPTIC_VESICLE_CLUSTERING		19	0.37594	1.96301	0.00617284	0.0430823	1	5887	tags=79%, list=41%, signal=135%
GOBP_REGULATION_OF_INTRACELLULAR_TRANSPORT	GOBP_REGULATION_OF_INTRACELLULAR_TRANSPORT		270	0.101785	1.96217	0.01417	0.0431701	1	8165	tags=67%, list=57%, signal=155%
GOBP_REGULATION_OF_AUTOPHAGY	GOBP_REGULATION_OF_AUTOPHAGY		279	0.104677	1.96066	0.00811359	0.0433806	1	10263	tags=82%, list=72%, signal=290%
GOBP_MITOTIC_SISTER_CHROMATID_SEGREGATION	GOBP_MITOTIC_SISTER_CHROMATID_SEGREGATION		167	0.127818	1.95956	0.00383877	0.043535	1	10976	tags=90%, list=77%, signal=389%
GOBP_REGULATION_OF_PROTEIN_LOCALIZATION_TO_MEMBRANE	GOBP_REGULATION_OF_PROTEIN_LOCALIZATION_TO_MEMBRANE		199	0.119902	1.95859	0.0127119	0.0436724	1	8251	tags=70%, list=58%, signal=164%
GOBP_REGULATION_OF_CELL_PROJECTION_ASSEMBLY	GOBP_REGULATION_OF_CELL_PROJECTION_ASSEMBLY		187	0.125979	1.95711	0.014	0.0438982	1	4543	tags=44%, list=32%, signal=64%
GOBP_ESTABLISHMENT_OF_EPITHELIAL_CELL_POLARITY	GOBP_ESTABLISHMENT_OF_EPITHELIAL_CELL_POLARITY		32	0.291346	1.95274	0.00963391	0.0449373	1	3420	tags=53%, list=24%, signal=70%
GOBP_ANTIGEN_PROCESSING_AND_PRESENTATION_OF_PEPTIDE_ANTIGEN	GOBP_ANTIGEN_PROCESSING_AND_PRESENTATION_OF_PEPTIDE_ANTIGEN		58	0.221394	1.95031	0.00421053	0.0454608	1	1522	tags=33%, list=11%, signal=37%
GOBP_REGULATION_OF_BIOMINERAL_TISSUE_DEVELOPMENT	GOBP_REGULATION_OF_BIOMINERAL_TISSUE_DEVELOPMENT		92	0.173079	1.94858	0.0135659	0.0457551	1	2500	tags=35%, list=18%, signal=42%
GOBP_REGULATION_OF_MODIFICATION_OF_POSTSYNAPTIC_STRUCTURE	GOBP_REGULATION_OF_MODIFICATION_OF_POSTSYNAPTIC_STRUCTURE		24	0.340759	1.94837	0.00614754	0.0456918	1	5827	tags=75%, list=41%, signal=127%
GOBP_ANTIGEN_PROCESSING_AND_PRESENTATION_OF_ENDOGENOUS_ANTIGEN	GOBP_ANTIGEN_PROCESSING_AND_PRESENTATION_OF_ENDOGENOUS_ANTIGEN		26	0.316561	1.94714	0.0104822	0.0459192	1	1522	tags=42%, list=11%, signal=47%
GOBP_REGULATION_OF_PROTEIN_LOCALIZATION_TO_PLASMA_MEMBRANE	GOBP_REGULATION_OF_PROTEIN_LOCALIZATION_TO_PLASMA_MEMBRANE		116	0.153744	1.94567	0.00779727	0.0461738	1	8251	tags=73%, list=58%, signal=173%
GOBP_PLATELET_DERIVED_GROWTH_FACTOR_RECEPTOR_SIGNALING_PATHWAY	GOBP_PLATELET_DERIVED_GROWTH_FACTOR_RECEPTOR_SIGNALING_PATHWAY		101	0.165574	1.94544	0.00627615	0.0461042	1	4842	tags=50%, list=34%, signal=76%
GOBP_RESPONSE_TO_INSULIN	GOBP_RESPONSE_TO_INSULIN		323	0.0927661	1.94529	0.0144928	0.0460098	1	5446	tags=47%, list=38%, signal=75%
GOBP_AXONAL_TRANSPORT	GOBP_AXONAL_TRANSPORT		59	0.20969	1.94501	0.00408163	0.0459627	1	8599	tags=81%, list=60%, signal=205%
GOBP_NEGATIVE_REGULATION_OF_CANONICAL_NF_KAPPAB_SIGNAL_TRANSDUCTION	GOBP_NEGATIVE_REGULATION_OF_CANONICAL_NF_KAPPAB_SIGNAL_TRANSDUCTION		78	0.184792	1.94377	0.0133588	0.0461302	1	9054	tags=82%, list=64%, signal=225%
GOBP_NEURAL_TUBE_PATTERNING	GOBP_NEURAL_TUBE_PATTERNING		45	0.248296	1.9437	0.00963391	0.046052	1	8488	tags=84%, list=60%, signal=209%
GOBP_CARDIAC_SEPTUM_DEVELOPMENT	GOBP_CARDIAC_SEPTUM_DEVELOPMENT		114	0.153059	1.94244	0.008	0.0463179	1	6073	tags=58%, list=43%, signal=100%
GOBP_NUCLEAR_ENVELOPE_ORGANIZATION	GOBP_NUCLEAR_ENVELOPE_ORGANIZATION		51	0.231332	1.94178	0.013834	0.0463663	1	5644	tags=63%, list=40%, signal=104%
GOBP_CEREBELLAR_CORTEX_DEVELOPMENT	GOBP_CEREBELLAR_CORTEX_DEVELOPMENT		57	0.225261	1.94031	0.00779727	0.0466204	1	8285	tags=81%, list=58%, signal=193%
GOBP_AMYLOID_PRECURSOR_PROTEIN_CATABOLIC_PROCESS	GOBP_AMYLOID_PRECURSOR_PROTEIN_CATABOLIC_PROCESS		56	0.214868	1.93987	0.00414079	0.0465657	1	3558	tags=46%, list=25%, signal=62%
GOBP_LIMBIC_SYSTEM_DEVELOPMENT	GOBP_LIMBIC_SYSTEM_DEVELOPMENT		106	0.161331	1.93966	0.00202429	0.0465057	1	7918	tags=72%, list=56%, signal=161%
GOBP_PROTEIN_LOCALIZATION_TO_MICROTUBULE_ORGANIZING_CENTER	GOBP_PROTEIN_LOCALIZATION_TO_MICROTUBULE_ORGANIZING_CENTER		37	0.269849	1.93877	0.00817996	0.046611	1	7702	tags=81%, list=54%, signal=176%
GOBP_WOUND_HEALING	GOBP_WOUND_HEALING		369	0.0892239	1.93826	0.00386847	0.0466119	1	2617	tags=27%, list=18%, signal=32%
GOBP_INTRACELLULAR_RECEPTOR_SIGNALING_PATHWAY	GOBP_INTRACELLULAR_RECEPTOR_SIGNALING_PATHWAY		347	0.091449	1.93659	0.00404858	0.0469776	1	8771	tags=71%, list=62%, signal=180%
GOBP_NON_CANONICAL_WNT_SIGNALING_PATHWAY	GOBP_NON_CANONICAL_WNT_SIGNALING_PATHWAY		58	0.218004	1.9361	0.00792079	0.0470386	1	6719	tags=69%, list=47%, signal=130%
GOBP_SPINAL_CORD_DEVELOPMENT	GOBP_SPINAL_CORD_DEVELOPMENT		91	0.173042	1.93327	0	0.047682	1	4430	tags=48%, list=31%, signal=70%
GOBP_CARDIAC_CHAMBER_DEVELOPMENT	GOBP_CARDIAC_CHAMBER_DEVELOPMENT		176	0.120193	1.93081	0.00591716	0.0482195	1	6391	tags=57%, list=45%, signal=102%
GOBP_SPINAL_CORD_PATTERNING	GOBP_SPINAL_CORD_PATTERNING		17	0.394773	1.93028	0.004329	0.0481952	1	4430	tags=71%, list=31%, signal=102%
GOBP_RAS_PROTEIN_SIGNAL_TRANSDUCTION	GOBP_RAS_PROTEIN_SIGNAL_TRANSDUCTION		107	0.160102	1.92996	0.0157791	0.048178	1	5315	tags=53%, list=37%, signal=84%
GOBP_METANEPHRIC_GLOMERULUS_DEVELOPMENT	GOBP_METANEPHRIC_GLOMERULUS_DEVELOPMENT		16	0.395376	1.92696	0.00775194	0.0489434	1	2382	tags=56%, list=17%, signal=67%
GOBP_SYNAPTIC_VESICLE_LOCALIZATION	GOBP_SYNAPTIC_VESICLE_LOCALIZATION		63	0.201679	1.92571	0.00816326	0.0491954	1	4367	tags=51%, list=31%, signal=73%
GOBP_CORTICAL_CYTOSKELETON_ORGANIZATION	GOBP_CORTICAL_CYTOSKELETON_ORGANIZATION		53	0.222114	1.92395	0.00974659	0.0495855	1	5975	tags=64%, list=42%, signal=110%
GOBP_CONNECTIVE_TISSUE_DEVELOPMENT	GOBP_CONNECTIVE_TISSUE_DEVELOPMENT		290	0.100575	1.92376	0.0063425	0.0495081	1	6493	tags=56%, list=46%, signal=100%
GOBP_REGULATION_OF_ERBB_SIGNALING_PATHWAY	GOBP_REGULATION_OF_ERBB_SIGNALING_PATHWAY		68	0.202852	1.9217	0.00763359	0.0500481	1	3402	tags=44%, list=24%, signal=58%
GOBP_RESPONSE_TO_INTERFERON_BETA	GOBP_RESPONSE_TO_INTERFERON_BETA		62	0.207229	1.92072	0.00785855	0.0502717	1	2111	tags=35%, list=15%, signal=41%
GOBP_POSITIVE_REGULATION_OF_RAS_PROTEIN_SIGNAL_TRANSDUCTION	GOBP_POSITIVE_REGULATION_OF_RAS_PROTEIN_SIGNAL_TRANSDUCTION		22	0.340415	1.92056	0	0.0502107	1	5508	tags=73%, list=39%, signal=119%
GOBP_PROTEIN_LOCALIZATION_TO_CILIUM	GOBP_PROTEIN_LOCALIZATION_TO_CILIUM		62	0.20446	1.92036	0.010101	0.0501586	1	6967	tags=69%, list=49%, signal=135%
GOBP_BASEMENT_MEMBRANE_ORGANIZATION	GOBP_BASEMENT_MEMBRANE_ORGANIZATION		40	0.258832	1.91926	0.014433	0.0502826	1	3439	tags=50%, list=24%, signal=66%
GOBP_EMBRYONIC_PLACENTA_MORPHOGENESIS	GOBP_EMBRYONIC_PLACENTA_MORPHOGENESIS		30	0.290501	1.91854	0.00796813	0.0503153	1	2987	tags=50%, list=21%, signal=63%
GOBP_AMYLOID_BETA_METABOLIC_PROCESS	GOBP_AMYLOID_BETA_METABOLIC_PROCESS		58	0.216135	1.91801	0.006	0.0503539	1	3558	tags=47%, list=25%, signal=62%
GOBP_NUCLEOTIDE_SUGAR_METABOLIC_PROCESS	GOBP_NUCLEOTIDE_SUGAR_METABOLIC_PROCESS		42	0.242359	1.91735	0.0137795	0.0504072	1	10445	tags=98%, list=73%, signal=367%
GOBP_PROTEIN_SUMOYLATION	GOBP_PROTEIN_SUMOYLATION		45	0.243705	1.91625	0.00793651	0.0506257	1	7289	tags=76%, list=51%, signal=155%
GOBP_EAR_MORPHOGENESIS	GOBP_EAR_MORPHOGENESIS		125	0.147501	1.91422	0.00393701	0.0511191	1	3722	tags=41%, list=26%, signal=55%
GOBP_PROTEIN_LOCALIZATION_TO_CELL_CELL_JUNCTION	GOBP_PROTEIN_LOCALIZATION_TO_CELL_CELL_JUNCTION		28	0.310352	1.91281	0.0104603	0.0514821	1	1181	tags=39%, list=8%, signal=43%
GOBP_HEPATOCYTE_GROWTH_FACTOR_RECEPTOR_SIGNALING_PATHWAY	GOBP_HEPATOCYTE_GROWTH_FACTOR_RECEPTOR_SIGNALING_PATHWAY		55	0.220681	1.90868	0.00592885	0.0525488	1	5664	tags=62%, list=40%, signal=102%
GOBP_EPIGENETIC_REGULATION_OF_GENE_EXPRESSION	GOBP_EPIGENETIC_REGULATION_OF_GENE_EXPRESSION		226	0.108781	1.90734	0.0181087	0.0528296	1	9866	tags=80%, list=69%, signal=257%
GOBP_EMBRYONIC_PATTERN_SPECIFICATION	GOBP_EMBRYONIC_PATTERN_SPECIFICATION		73	0.186499	1.90703	0.00580271	0.052816	1	1841	tags=32%, list=13%, signal=36%
GOBP_POSITIVE_REGULATION_OF_PLASMA_MEMBRANE_BOUNDED_CELL_PROJECTION_ASSEMBLY	GOBP_POSITIVE_REGULATION_OF_PLASMA_MEMBRANE_BOUNDED_CELL_PROJECTION_ASSEMBLY		99	0.16476	1.90636	0.00849257	0.0529029	1	4280	tags=46%, list=30%, signal=66%
GOBP_OSSIFICATION	GOBP_OSSIFICATION		400	0.082307	1.90566	0.00931099	0.0529838	1	2630	tags=26%, list=18%, signal=32%
GOBP_INTERLEUKIN_6_MEDIATED_SIGNALING_PATHWAY	GOBP_INTERLEUKIN_6_MEDIATED_SIGNALING_PATHWAY		16	0.39113	1.89993	0.00828157	0.0545852	1	8664	tags=100%, list=61%, signal=256%
GOBP_LABYRINTHINE_LAYER_DEVELOPMENT	GOBP_LABYRINTHINE_LAYER_DEVELOPMENT		55	0.218655	1.89904	0.010101	0.054718	1	4917	tags=56%, list=35%, signal=86%
GOBP_STRIATED_MUSCLE_CELL_PROLIFERATION	GOBP_STRIATED_MUSCLE_CELL_PROLIFERATION		84	0.178729	1.89901	0.0164271	0.0545978	1	5260	tags=55%, list=37%, signal=86%
GOBP_BIOMINERAL_TISSUE_DEVELOPMENT	GOBP_BIOMINERAL_TISSUE_DEVELOPMENT		159	0.130321	1.89876	0.00598802	0.0545545	1	2549	tags=31%, list=18%, signal=37%
GOBP_REGULATION_OF_CELLULAR_RESPONSE_TO_GROWTH_FACTOR_STIMULUS	GOBP_REGULATION_OF_CELLULAR_RESPONSE_TO_GROWTH_FACTOR_STIMULUS		302	0.0945152	1.89872	0.00568182	0.0544435	1	6877	tags=58%, list=48%, signal=109%
GOBP_LATE_ENDOSOME_TO_VACUOLE_TRANSPORT	GOBP_LATE_ENDOSOME_TO_VACUOLE_TRANSPORT		25	0.314711	1.89677	0.0102041	0.0549272	1	7477	tags=84%, list=53%, signal=177%
GOBP_CELL_SURFACE_RECEPTOR_SIGNALING_PATHWAY_VIA_STAT	GOBP_CELL_SURFACE_RECEPTOR_SIGNALING_PATHWAY_VIA_STAT		150	0.131134	1.89522	0.00792079	0.0552684	1	6402	tags=58%, list=45%, signal=104%
GOBP_POSITIVE_REGULATION_OF_PROTEOLYSIS_INVOLVED_IN_PROTEIN_CATABOLIC_PROCESS	GOBP_POSITIVE_REGULATION_OF_PROTEOLYSIS_INVOLVED_IN_PROTEIN_CATABOLIC_PROCESS		121	0.151282	1.89488	0.0136719	0.0552409	1	8326	tags=74%, list=59%, signal=176%
GOBP_BRANCHING_INVOLVED_IN_BLOOD_VESSEL_MORPHOGENESIS	GOBP_BRANCHING_INVOLVED_IN_BLOOD_VESSEL_MORPHOGENESIS		42	0.247878	1.89478	0.00826446	0.0551295	1	5965	tags=67%, list=42%, signal=114%
GOBP_PROTEIN_LOCALIZATION_TO_ENDOSOME	GOBP_PROTEIN_LOCALIZATION_TO_ENDOSOME		24	0.32879	1.89355	0.00387597	0.0553978	1	7182	tags=83%, list=51%, signal=168%
GOBP_EMBRYONIC_DIGIT_MORPHOGENESIS	GOBP_EMBRYONIC_DIGIT_MORPHOGENESIS		62	0.203578	1.89156	0	0.0558901	1	6062	tags=63%, list=43%, signal=109%
GOBP_BODY_MORPHOGENESIS	GOBP_BODY_MORPHOGENESIS		59	0.208007	1.88996	0.0217391	0.0562477	1	9828	tags=90%, list=69%, signal=290%
GOBP_PROTEIN_LOCALIZATION_TO_VACUOLE	GOBP_PROTEIN_LOCALIZATION_TO_VACUOLE		66	0.194008	1.88775	0.0121704	0.0567966	1	10181	tags=91%, list=72%, signal=319%
GOBP_NEGATIVE_REGULATION_OF_HORMONE_SECRETION	GOBP_NEGATIVE_REGULATION_OF_HORMONE_SECRETION		86	0.173797	1.88747	0.00587084	0.056752	1	3330	tags=41%, list=23%, signal=53%
GOBP_REGULATION_OF_POST_TRANSLATIONAL_PROTEIN_MODIFICATION	GOBP_REGULATION_OF_POST_TRANSLATIONAL_PROTEIN_MODIFICATION		226	0.108155	1.88549	0.00828157	0.0572203	1	10504	tags=85%, list=74%, signal=318%
GOBP_NUCLEAR_TRANSCRIBED_MRNA_CATABOLIC_PROCESS	GOBP_NUCLEAR_TRANSCRIBED_MRNA_CATABOLIC_PROCESS		107	0.152616	1.88454	0.00988142	0.0574009	1	10604	tags=90%, list=75%, signal=350%
GOBP_NEGATIVE_REGULATION_OF_ENDOTHELIAL_CELL_PROLIFERATION	GOBP_NEGATIVE_REGULATION_OF_ENDOTHELIAL_CELL_PROLIFERATION		41	0.249267	1.88173	0.00626305	0.0582592	1	6870	tags=73%, list=48%, signal=141%
GOBP_PRESYNAPSE_ASSEMBLY	GOBP_PRESYNAPSE_ASSEMBLY		41	0.245753	1.8773	0.00603622	0.0596742	1	4145	tags=54%, list=29%, signal=76%
GOBP_PHAGOCYTOSIS_ENGULFMENT	GOBP_PHAGOCYTOSIS_ENGULFMENT		51	0.220716	1.87632	0.00206186	0.059898	1	3006	tags=43%, list=21%, signal=55%
GOBP_SEMAPHORIN_PLEXIN_SIGNALING_PATHWAY	GOBP_SEMAPHORIN_PLEXIN_SIGNALING_PATHWAY		49	0.226601	1.87593	0.00785855	0.0598794	1	3753	tags=49%, list=26%, signal=66%
GOBP_POSITIVE_REGULATION_OF_SYNAPTIC_TRANSMISSION	GOBP_POSITIVE_REGULATION_OF_SYNAPTIC_TRANSMISSION		172	0.121027	1.87222	0.0143737	0.0610748	1	6236	tags=56%, list=44%, signal=98%
GOBP_CANONICAL_INFLAMMASOME_COMPLEX_ASSEMBLY	GOBP_CANONICAL_INFLAMMASOME_COMPLEX_ASSEMBLY		47	0.237334	1.87127	0.00205339	0.0612923	1	8738	tags=85%, list=61%, signal=220%
GOBP_AMYLOID_PRECURSOR_PROTEIN_METABOLIC_PROCESS	GOBP_AMYLOID_PRECURSOR_PROTEIN_METABOLIC_PROCESS		71	0.187291	1.8702	0.00798403	0.0615549	1	3558	tags=44%, list=25%, signal=58%
GOBP_MRNA_TRANSPORT	GOBP_MRNA_TRANSPORT		104	0.157814	1.86675	0.0120482	0.0625503	1	10488	tags=89%, list=74%, signal=338%
GOBP_REGULATION_OF_STRESS_ACTIVATED_PROTEIN_KINASE_SIGNALING_CASCADE	GOBP_REGULATION_OF_STRESS_ACTIVATED_PROTEIN_KINASE_SIGNALING_CASCADE		38	0.253215	1.86457	0.0133843	0.0631384	1	8009	tags=82%, list=56%, signal=186%
GOBP_PEPTIDYL_TYROSINE_MODIFICATION	GOBP_PEPTIDYL_TYROSINE_MODIFICATION		266	0.0994189	1.86447	0.00623701	0.0630216	1	3744	tags=36%, list=26%, signal=48%
GOBP_POST_ANAL_TAIL_MORPHOGENESIS	GOBP_POST_ANAL_TAIL_MORPHOGENESIS		24	0.316431	1.86436	0.00404858	0.0629107	1	7950	tags=88%, list=56%, signal=198%
GOBP_CATECHOLAMINE_TRANSPORT	GOBP_CATECHOLAMINE_TRANSPORT		65	0.197425	1.86391	0.00994036	0.0629257	1	3549	tags=45%, list=25%, signal=59%
GOBP_NEGATIVE_REGULATION_OF_TRANSFERASE_ACTIVITY	GOBP_NEGATIVE_REGULATION_OF_TRANSFERASE_ACTIVITY		188	0.119368	1.8635	0.0207469	0.0629142	1	6796	tags=60%, list=48%, signal=113%
GOBP_REGULATION_OF_VESICLE_FUSION	GOBP_REGULATION_OF_VESICLE_FUSION		37	0.260267	1.86264	0.0104384	0.0630817	1	2457	tags=43%, list=17%, signal=52%
GOBP_RENAL_SYSTEM_VASCULATURE_DEVELOPMENT	GOBP_RENAL_SYSTEM_VASCULATURE_DEVELOPMENT		33	0.278186	1.86155	0.0208729	0.0632955	1	3809	tags=55%, list=27%, signal=74%
GOBP_SKELETAL_MUSCLE_ACETYLCHOLINE_GATED_CHANNEL_CLUSTERING	GOBP_SKELETAL_MUSCLE_ACETYLCHOLINE_GATED_CHANNEL_CLUSTERING		19	0.359216	1.86062	0.0176817	0.0634616	1	6873	tags=84%, list=48%, signal=163%
GOBP_RESPONSE_TO_BMP	GOBP_RESPONSE_TO_BMP		156	0.128883	1.85963	0.0147992	0.0636503	1	6573	tags=59%, list=46%, signal=108%
GOBP_VENTRICULAR_TRABECULA_MYOCARDIUM_MORPHOGENESIS	GOBP_VENTRICULAR_TRABECULA_MYOCARDIUM_MORPHOGENESIS		15	0.397222	1.85662	0.0120724	0.0645782	1	7629	tags=93%, list=54%, signal=201%
GOBP_REGULATION_OF_PROTEOLYSIS_INVOLVED_IN_PROTEIN_CATABOLIC_PROCESS	GOBP_REGULATION_OF_PROTEOLYSIS_INVOLVED_IN_PROTEIN_CATABOLIC_PROCESS		211	0.110543	1.85649	0.0126582	0.0644866	1	8897	tags=73%, list=63%, signal=193%
GOBP_NEGATIVE_REGULATION_OF_VASCULAR_PERMEABILITY	GOBP_NEGATIVE_REGULATION_OF_VASCULAR_PERMEABILITY		20	0.34649	1.85472	0.0138889	0.064991	1	2189	tags=50%, list=15%, signal=59%
GOBP_REGULATION_OF_PROTEIN_LOCALIZATION_TO_CELL_PERIPHERY	GOBP_REGULATION_OF_PROTEIN_LOCALIZATION_TO_CELL_PERIPHERY		150	0.127745	1.85241	0.0172745	0.065692	1	8251	tags=71%, list=58%, signal=167%
GOBP_CELLULAR_RESPONSE_TO_PEPTIDE_HORMONE_STIMULUS	GOBP_CELLULAR_RESPONSE_TO_PEPTIDE_HORMONE_STIMULUS		355	0.0878084	1.84787	0.00984252	0.0671432	1	8636	tags=69%, list=61%, signal=172%
GOBP_GASTRULATION	GOBP_GASTRULATION		180	0.1187	1.84684	0.00804829	0.0673868	1	7734	tags=66%, list=54%, signal=143%
GOBP_RESPONSE_TO_AMPHETAMINE	GOBP_RESPONSE_TO_AMPHETAMINE		27	0.292917	1.84673	0.0106383	0.0672857	1	5322	tags=67%, list=37%, signal=106%
GOBP_INTESTINAL_ABSORPTION	GOBP_INTESTINAL_ABSORPTION		42	0.241635	1.84515	0.01417	0.0676865	1	636	tags=29%, list=4%, signal=30%
GOBP_NEGATIVE_REGULATION_OF_HIPPO_SIGNALING	GOBP_NEGATIVE_REGULATION_OF_HIPPO_SIGNALING		21	0.33841	1.84447	0.0139165	0.0677928	1	7383	tags=86%, list=52%, signal=178%
GOBP_CELL_CYCLE_PHASE_TRANSITION	GOBP_CELL_CYCLE_PHASE_TRANSITION		492	0.0732986	1.84395	0.0136187	0.0678674	1	10092	tags=78%, list=71%, signal=260%
GOBP_POSITIVE_REGULATION_OF_BLOOD_VESSEL_ENDOTHELIAL_CELL_MIGRATION	GOBP_POSITIVE_REGULATION_OF_BLOOD_VESSEL_ENDOTHELIAL_CELL_MIGRATION		57	0.204082	1.84357	0.00994036	0.0678925	1	8086	tags=77%, list=57%, signal=178%
GOBP_REGULATION_OF_G_PROTEIN_COUPLED_RECEPTOR_SIGNALING_PATHWAY	GOBP_REGULATION_OF_G_PROTEIN_COUPLED_RECEPTOR_SIGNALING_PATHWAY		124	0.143144	1.84343	0.0140562	0.0678013	1	3486	tags=39%, list=25%, signal=51%
GOBP_REGULATION_OF_DOUBLE_STRAND_BREAK_REPAIR_VIA_HOMOLOGOUS_RECOMBINATION	GOBP_REGULATION_OF_DOUBLE_STRAND_BREAK_REPAIR_VIA_HOMOLOGOUS_RECOMBINATION		67	0.197134	1.84319	0.00838574	0.0677362	1	10793	tags=96%, list=76%, signal=394%
GOBP_BONE_DEVELOPMENT	GOBP_BONE_DEVELOPMENT		218	0.109824	1.8416	0.0264151	0.0682445	1	5115	tags=47%, list=36%, signal=72%
GOBP_REGULATION_OF_HORMONE_SECRETION	GOBP_REGULATION_OF_HORMONE_SECRETION		288	0.0940628	1.84109	0.0181087	0.0682787	1	3330	tags=33%, list=23%, signal=42%
GOBP_TRNA_WOBBLE_BASE_MODIFICATION	GOBP_TRNA_WOBBLE_BASE_MODIFICATION		17	0.382775	1.83925	0.014	0.0688768	1	7110	tags=88%, list=50%, signal=176%
GOBP_PHOTORECEPTOR_CELL_DEVELOPMENT	GOBP_PHOTORECEPTOR_CELL_DEVELOPMENT		49	0.217726	1.8389	0.0243408	0.0688353	1	4169	tags=51%, list=29%, signal=72%
GOBP_POSITIVE_REGULATION_OF_PEPTIDYL_TYROSINE_PHOSPHORYLATION	GOBP_POSITIVE_REGULATION_OF_PEPTIDYL_TYROSINE_PHOSPHORYLATION		147	0.128257	1.83069	0.00998004	0.0718108	1	5643	tags=52%, list=40%, signal=86%
GOBP_RESPONSE_TO_AMYLOID_BETA	GOBP_RESPONSE_TO_AMYLOID_BETA		42	0.237105	1.83047	0.011811	0.0717484	1	3409	tags=48%, list=24%, signal=62%
GOBP_POSTREPLICATION_REPAIR	GOBP_POSTREPLICATION_REPAIR		26	0.303419	1.82864	0.0153846	0.0722806	1	9366	tags=96%, list=66%, signal=281%
GOBP_AUDITORY_RECEPTOR_CELL_DEVELOPMENT	GOBP_AUDITORY_RECEPTOR_CELL_DEVELOPMENT		26	0.302869	1.82596	0.0119522	0.0731591	1	6639	tags=77%, list=47%, signal=144%
GOBP_CYTOKINE_MEDIATED_SIGNALING_PATHWAY	GOBP_CYTOKINE_MEDIATED_SIGNALING_PATHWAY		464	0.0743983	1.82566	0.016632	0.0731323	1	4952	tags=42%, list=35%, signal=62%
GOBP_EMBRYONIC_HEART_TUBE_MORPHOGENESIS	GOBP_EMBRYONIC_HEART_TUBE_MORPHOGENESIS		62	0.193485	1.82374	0.021611	0.0737508	1	8728	tags=81%, list=61%, signal=208%
GOBP_SENSORY_PERCEPTION_OF_TASTE	GOBP_SENSORY_PERCEPTION_OF_TASTE		25	0.297191	1.82177	0.0206186	0.0744317	1	3175	tags=52%, list=22%, signal=67%
GOBP_NEGATIVE_REGULATION_OF_NEURON_PROJECTION_DEVELOPMENT	GOBP_NEGATIVE_REGULATION_OF_NEURON_PROJECTION_DEVELOPMENT		141	0.130109	1.82052	0.0100604	0.0747334	1	6034	tags=55%, list=42%, signal=95%
GOBP_SMOOTH_MUSCLE_CELL_DIFFERENTIATION	GOBP_SMOOTH_MUSCLE_CELL_DIFFERENTIATION		78	0.175865	1.81792	0.0153257	0.0755629	1	3346	tags=41%, list=24%, signal=53%
GOBP_REGULATION_OF_AMYLOID_PRECURSOR_PROTEIN_CATABOLIC_PROCESS	GOBP_REGULATION_OF_AMYLOID_PRECURSOR_PROTEIN_CATABOLIC_PROCESS		41	0.241532	1.81769	0.0169492	0.0754815	1	3858	tags=51%, list=27%, signal=70%
GOBP_PROTEIN_K48_LINKED_UBIQUITINATION	GOBP_PROTEIN_K48_LINKED_UBIQUITINATION		90	0.164386	1.81762	0.02079	0.0753677	1	11107	tags=94%, list=78%, signal=429%
GOBP_NEGATIVE_REGULATION_OF_CELL_PROJECTION_ORGANIZATION	GOBP_NEGATIVE_REGULATION_OF_CELL_PROJECTION_ORGANIZATION		193	0.111354	1.81622	0.0211538	0.0757792	1	5879	tags=52%, list=41%, signal=88%
GOBP_COLLAGEN_CATABOLIC_PROCESS	GOBP_COLLAGEN_CATABOLIC_PROCESS		32	0.263197	1.81215	0.00972763	0.0772793	1	3375	tags=50%, list=24%, signal=65%
GOBP_REGULATION_OF_AMYLOID_BETA_FORMATION	GOBP_REGULATION_OF_AMYLOID_BETA_FORMATION		34	0.258671	1.81086	0.0178926	0.0776883	1	3858	tags=53%, list=27%, signal=72%
GOBP_COLLAGEN_ACTIVATED_SIGNALING_PATHWAY	GOBP_COLLAGEN_ACTIVATED_SIGNALING_PATHWAY		58	0.204909	1.8108	0.0177165	0.077551	1	3717	tags=47%, list=26%, signal=63%
GOBP_POSITIVE_REGULATION_OF_GLIOGENESIS	GOBP_POSITIVE_REGULATION_OF_GLIOGENESIS		82	0.166758	1.81034	0.0139165	0.0775573	1	4058	tags=45%, list=29%, signal=63%
GOBP_REGULATION_OF_PATTERN_RECOGNITION_RECEPTOR_SIGNALING_PATHWAY	GOBP_REGULATION_OF_PATTERN_RECOGNITION_RECEPTOR_SIGNALING_PATHWAY		162	0.121834	1.80924	0.015748	0.0778773	1	8908	tags=75%, list=63%, signal=198%
GOBP_ESTABLISHMENT_OF_PROTEIN_LOCALIZATION_TO_ORGANELLE	GOBP_ESTABLISHMENT_OF_PROTEIN_LOCALIZATION_TO_ORGANELLE		406	0.0787487	1.80877	0.0182186	0.0778959	1	10435	tags=81%, list=73%, signal=296%
GOBP_EPIDERMIS_DEVELOPMENT	GOBP_EPIDERMIS_DEVELOPMENT		340	0.0853134	1.80628	0.014862	0.0787909	1	5507	tags=47%, list=39%, signal=75%
GOBP_CELLULAR_RESPONSE_TO_INSULIN_STIMULUS	GOBP_CELLULAR_RESPONSE_TO_INSULIN_STIMULUS		264	0.0964747	1.80599	0.0223124	0.078765	1	10234	tags=81%, list=72%, signal=285%
GOBP_ENDOSOME_ORGANIZATION	GOBP_ENDOSOME_ORGANIZATION		64	0.194615	1.80592	0.016129	0.078637	1	9465	tags=86%, list=67%, signal=256%
GOBP_INFLAMMASOME_MEDIATED_SIGNALING_PATHWAY	GOBP_INFLAMMASOME_MEDIATED_SIGNALING_PATHWAY		52	0.213189	1.80562	0.0132827	0.078622	1	8738	tags=83%, list=61%, signal=214%
GOBP_POSITIVE_REGULATION_OF_ERK1_AND_ERK2_CASCADE	GOBP_POSITIVE_REGULATION_OF_ERK1_AND_ERK2_CASCADE		175	0.117855	1.80082	0.010142	0.0803849	1	7120	tags=62%, list=50%, signal=122%
GOBP_REGULATION_OF_BONE_MINERALIZATION	GOBP_REGULATION_OF_BONE_MINERALIZATION		77	0.178562	1.80059	0.0174757	0.0803102	1	2460	tags=35%, list=17%, signal=42%
GOBP_TRANSFORMING_GROWTH_FACTOR_BETA_RECEPTOR_SIGNALING_PATHWAY	GOBP_TRANSFORMING_GROWTH_FACTOR_BETA_RECEPTOR_SIGNALING_PATHWAY		198	0.109208	1.7997	0.0207469	0.0805219	1	8451	tags=70%, list=59%, signal=171%
GOBP_AORTA_DEVELOPMENT	GOBP_AORTA_DEVELOPMENT		68	0.184344	1.79929	0.0194932	0.0805668	1	8474	tags=78%, list=60%, signal=192%
GOBP_NEGATIVE_REGULATION_OF_OLIGODENDROCYTE_DIFFERENTIATION	GOBP_NEGATIVE_REGULATION_OF_OLIGODENDROCYTE_DIFFERENTIATION		16	0.37496	1.79904	0.0275591	0.0805434	1	2672	tags=56%, list=19%, signal=69%
GOBP_D_GLUCOSE_IMPORT	GOBP_D_GLUCOSE_IMPORT		75	0.179056	1.79899	0.018	0.0804087	1	4861	tags=52%, list=34%, signal=79%
GOBP_LUNG_EPITHELIUM_DEVELOPMENT	GOBP_LUNG_EPITHELIUM_DEVELOPMENT		55	0.208208	1.79849	0.0233546	0.0804747	1	5065	tags=56%, list=36%, signal=87%
GOBP_ORGANELLE_FISSION	GOBP_ORGANELLE_FISSION		414	0.0756738	1.7981	0.0141414	0.08048	1	10118	tags=79%, list=71%, signal=264%
GOBP_PROTEIN_LOCALIZATION_TO_LYSOSOME	GOBP_PROTEIN_LOCALIZATION_TO_LYSOSOME		41	0.237891	1.79729	0.0211538	0.0806464	1	10153	tags=95%, list=71%, signal=332%
GOBP_GLUTAMATE_RECEPTOR_SIGNALING_PATHWAY	GOBP_GLUTAMATE_RECEPTOR_SIGNALING_PATHWAY		48	0.21615	1.79607	0.0175781	0.0808908	1	4046	tags=50%, list=28%, signal=70%
GOBP_NEGATIVE_REGULATION_OF_NEURON_DIFFERENTIATION	GOBP_NEGATIVE_REGULATION_OF_NEURON_DIFFERENTIATION		76	0.175733	1.79588	0.0184049	0.0808118	1	8179	tags=75%, list=58%, signal=176%
GOBP_MRNA_CATABOLIC_PROCESS	GOBP_MRNA_CATABOLIC_PROCESS		215	0.10589	1.7933	0.0140562	0.0817875	1	10488	tags=84%, list=74%, signal=316%
GOBP_PHARYNGEAL_SYSTEM_DEVELOPMENT	GOBP_PHARYNGEAL_SYSTEM_DEVELOPMENT		28	0.285005	1.79263	0.014862	0.0819398	1	5096	tags=64%, list=36%, signal=100%
GOBP_REGULATION_OF_TOR_SIGNALING	GOBP_REGULATION_OF_TOR_SIGNALING		135	0.13254	1.79209	0.0178926	0.0819868	1	11721	tags=96%, list=82%, signal=538%
GOBP_NUCLEAR_PORE_ORGANIZATION	GOBP_NUCLEAR_PORE_ORGANIZATION		15	0.386306	1.79014	0.015625	0.082605	1	6836	tags=87%, list=48%, signal=167%
GOBP_SKELETAL_MUSCLE_CELL_PROLIFERATION	GOBP_SKELETAL_MUSCLE_CELL_PROLIFERATION		23	0.317283	1.7897	0.0171756	0.0826301	1	7242	tags=83%, list=51%, signal=168%
GOBP_OSTEOBLAST_DIFFERENTIATION	GOBP_OSTEOBLAST_DIFFERENTIATION		207	0.107239	1.78758	0.015748	0.0834387	1	5641	tags=50%, list=40%, signal=82%
GOBP_CELL_SUBSTRATE_ADHESION	GOBP_CELL_SUBSTRATE_ADHESION		339	0.0858719	1.78586	0.00592885	0.0840166	1	6274	tags=53%, list=44%, signal=92%
GOBP_BRAIN_DERIVED_NEUROTROPHIC_FACTOR_RECEPTOR_SIGNALING_PATHWAY	GOBP_BRAIN_DERIVED_NEUROTROPHIC_FACTOR_RECEPTOR_SIGNALING_PATHWAY		52	0.211802	1.78584	0.0105263	0.0838528	1	3835	tags=48%, list=27%, signal=66%
GOBP_ENTEROENDOCRINE_CELL_DIFFERENTIATION	GOBP_ENTEROENDOCRINE_CELL_DIFFERENTIATION		33	0.262029	1.78316	0.0242424	0.0848885	1	5762	tags=67%, list=41%, signal=112%
GOBP_REGULATION_OF_FIBROBLAST_GROWTH_FACTOR_RECEPTOR_SIGNALING_PATHWAY	GOBP_REGULATION_OF_FIBROBLAST_GROWTH_FACTOR_RECEPTOR_SIGNALING_PATHWAY		32	0.268161	1.7828	0.0136986	0.0848873	1	5971	tags=69%, list=42%, signal=118%
GOBP_REGULATION_OF_PROTEIN_CONTAINING_COMPLEX_ASSEMBLY	GOBP_REGULATION_OF_PROTEIN_CONTAINING_COMPLEX_ASSEMBLY		396	0.0798455	1.78259	0.0198807	0.0848042	1	3420	tags=32%, list=24%, signal=41%
GOBP_REGULATION_OF_PRESYNAPSE_ORGANIZATION	GOBP_REGULATION_OF_PRESYNAPSE_ORGANIZATION		32	0.269315	1.78218	0.0166667	0.0848198	1	4177	tags=56%, list=29%, signal=79%
GOBP_NEGATIVE_REGULATION_OF_PROTEIN_LOCALIZATION_TO_NUCLEUS	GOBP_NEGATIVE_REGULATION_OF_PROTEIN_LOCALIZATION_TO_NUCLEUS		43	0.228802	1.78158	0.022449	0.0849557	1	8661	tags=84%, list=61%, signal=213%
GOBP_ERAD_PATHWAY	GOBP_ERAD_PATHWAY		102	0.152072	1.78111	0.0218688	0.0850221	1	10121	tags=86%, list=71%, signal=297%
GOBP_OLIGOSACCHARIDE_BIOSYNTHETIC_PROCESS	GOBP_OLIGOSACCHARIDE_BIOSYNTHETIC_PROCESS		16	0.373979	1.7798	0.0197239	0.0854554	1	7130	tags=88%, list=50%, signal=175%
GOBP_RNA_EXPORT_FROM_NUCLEUS	GOBP_RNA_EXPORT_FROM_NUCLEUS		71	0.178815	1.77955	0.018711	0.0854089	1	10488	tags=92%, list=74%, signal=347%
GOBP_INNER_EAR_MORPHOGENESIS	GOBP_INNER_EAR_MORPHOGENESIS		103	0.14739	1.7791	0.0150376	0.0854692	1	3717	tags=41%, list=26%, signal=55%
GOBP_POSITIVE_REGULATION_OF_VESICLE_FUSION	GOBP_POSITIVE_REGULATION_OF_VESICLE_FUSION		26	0.289224	1.77826	0.0102881	0.0856796	1	2457	tags=46%, list=17%, signal=56%
GOBP_POSITIVE_REGULATION_OF_VASOCONSTRICTION	GOBP_POSITIVE_REGULATION_OF_VASOCONSTRICTION		48	0.217594	1.77808	0.0160643	0.0855894	1	3433	tags=46%, list=24%, signal=60%
GOBP_ANTIGEN_PROCESSING_AND_PRESENTATION_VIA_MHC_CLASS_IB	GOBP_ANTIGEN_PROCESSING_AND_PRESENTATION_VIA_MHC_CLASS_IB		24	0.310095	1.7763	0.0250965	0.0861595	1	1522	tags=42%, list=11%, signal=47%
GOBP_VESICLE_MEDIATED_TRANSPORT_IN_SYNAPSE	GOBP_VESICLE_MEDIATED_TRANSPORT_IN_SYNAPSE		289	0.0902788	1.7744	0.0158103	0.086894	1	6270	tags=53%, list=44%, signal=93%
GOBP_CATECHOLAMINE_SECRETION	GOBP_CATECHOLAMINE_SECRETION		51	0.20873	1.77239	0.012024	0.0876728	1	2897	tags=41%, list=20%, signal=52%
GOBP_ESTABLISHMENT_OF_RNA_LOCALIZATION	GOBP_ESTABLISHMENT_OF_RNA_LOCALIZATION		131	0.133891	1.77149	0.00775194	0.0878966	1	10488	tags=87%, list=74%, signal=328%
GOBP_NEGATIVE_REGULATION_OF_CELL_CYCLE_G2_M_PHASE_TRANSITION	GOBP_NEGATIVE_REGULATION_OF_CELL_CYCLE_G2_M_PHASE_TRANSITION		64	0.189444	1.7709	0.0196078	0.0879883	1	8205	tags=77%, list=58%, signal=180%
GOBP_HETEROPHILIC_CELL_CELL_ADHESION_VIA_PLASMA_MEMBRANE_CELL_ADHESION_MOLECULES	GOBP_HETEROPHILIC_CELL_CELL_ADHESION_VIA_PLASMA_MEMBRANE_CELL_ADHESION_MOLECULES		38	0.242778	1.77073	0.0228571	0.0878951	1	1795	tags=37%, list=13%, signal=42%
GOBP_SYNAPTIC_VESICLE_CYCLE	GOBP_SYNAPTIC_VESICLE_CYCLE		235	0.100699	1.76888	0.0188285	0.0886932	1	4158	tags=39%, list=29%, signal=54%
GOBP_REGULATION_OF_SYNAPTIC_VESICLE_MEMBRANE_ORGANIZATION	GOBP_REGULATION_OF_SYNAPTIC_VESICLE_MEMBRANE_ORGANIZATION		22	0.308761	1.76632	0.0195312	0.0897211	1	2079	tags=45%, list=15%, signal=53%
GOBP_MITOTIC_G2_M_TRANSITION_CHECKPOINT	GOBP_MITOTIC_G2_M_TRANSITION_CHECKPOINT		48	0.21536	1.76587	0.0142857	0.0897429	1	8205	tags=79%, list=58%, signal=187%
GOBP_POSITIVE_REGULATION_OF_OSSIFICATION	GOBP_POSITIVE_REGULATION_OF_OSSIFICATION		60	0.196341	1.76497	0.0140281	0.0900376	1	2670	tags=38%, list=19%, signal=47%
GOBP_REGULATION_OF_PROTEOLYSIS	GOBP_REGULATION_OF_PROTEOLYSIS		384	0.0784491	1.76462	0.0176817	0.0900252	1	6024	tags=50%, list=42%, signal=84%
GOBP_RESPONSE_TO_INTERFERON_ALPHA	GOBP_RESPONSE_TO_INTERFERON_ALPHA		30	0.267242	1.76165	0.0261044	0.0912008	1	2369	tags=43%, list=17%, signal=52%
GOBP_SPHINGOLIPID_METABOLIC_PROCESS	GOBP_SPHINGOLIPID_METABOLIC_PROCESS		130	0.133589	1.75993	0.0261569	0.0919056	1	3805	tags=40%, list=27%, signal=54%
GOBP_REGULATION_OF_P38MAPK_CASCADE	GOBP_REGULATION_OF_P38MAPK_CASCADE		43	0.222064	1.75896	0.010142	0.0921342	1	3465	tags=47%, list=24%, signal=61%
GOBP_MICROTUBULE_BASED_TRANSPORT	GOBP_MICROTUBULE_BASED_TRANSPORT		186	0.109851	1.75629	0.025641	0.0931602	1	5109	tags=47%, list=36%, signal=72%
GOBP_CELLULAR_COMPONENT_DISASSEMBLY	GOBP_CELLULAR_COMPONENT_DISASSEMBLY		376	0.0769801	1.75407	0.0209125	0.0941236	1	10015	tags=78%, list=70%, signal=257%
GOBP_INTERLEUKIN_1_MEDIATED_SIGNALING_PATHWAY	GOBP_INTERLEUKIN_1_MEDIATED_SIGNALING_PATHWAY		29	0.274424	1.75386	0.0215264	0.094063	1	9835	tags=97%, list=69%, signal=312%
GOBP_POSITIVE_REGULATION_OF_VIRAL_GENOME_REPLICATION	GOBP_POSITIVE_REGULATION_OF_VIRAL_GENOME_REPLICATION		24	0.298138	1.75346	0.0140562	0.0940982	1	5247	tags=67%, list=37%, signal=105%
GOBP_NEGATIVE_REGULATION_OF_PEPTIDE_SECRETION	GOBP_NEGATIVE_REGULATION_OF_PEPTIDE_SECRETION		65	0.181985	1.75334	0.0207939	0.0939689	1	3330	tags=42%, list=23%, signal=54%
GOBP_MAINTENANCE_OF_PROTEIN_LOCALIZATION_IN_ORGANELLE	GOBP_MAINTENANCE_OF_PROTEIN_LOCALIZATION_IN_ORGANELLE		42	0.228002	1.75193	0.0224033	0.0945058	1	8617	tags=83%, list=61%, signal=211%
GOBP_DNA_REPLICATION	GOBP_DNA_REPLICATION		240	0.0973745	1.75189	0.0164609	0.0943501	1	11318	tags=89%, list=80%, signal=429%
GOBP_DOLICHOL_LINKED_OLIGOSACCHARIDE_BIOSYNTHETIC_PROCESS	GOBP_DOLICHOL_LINKED_OLIGOSACCHARIDE_BIOSYNTHETIC_PROCESS		17	0.350042	1.7516	0.0121951	0.0942939	1	9248	tags=100%, list=65%, signal=286%
GOBP_NEGATIVE_REGULATION_OF_HYDROLASE_ACTIVITY	GOBP_NEGATIVE_REGULATION_OF_HYDROLASE_ACTIVITY		87	0.162287	1.75039	0.030303	0.0947014	1	4734	tags=49%, list=33%, signal=74%
GOBP_REGULATION_OF_RNA_STABILITY	GOBP_REGULATION_OF_RNA_STABILITY		154	0.121509	1.74893	0.0199601	0.095249	1	9094	tags=76%, list=64%, signal=208%
GOBP_REGULATION_OF_ANOIKIS	GOBP_REGULATION_OF_ANOIKIS		20	0.319604	1.7488	0.0269231	0.0951658	1	5415	tags=70%, list=38%, signal=113%
GOBP_REGULATION_OF_MEMBRANE_LIPID_DISTRIBUTION	GOBP_REGULATION_OF_MEMBRANE_LIPID_DISTRIBUTION		60	0.1893	1.7479	0.0183299	0.0954594	1	7036	tags=68%, list=49%, signal=135%
GOBP_NEURON_RECOGNITION	GOBP_NEURON_RECOGNITION		45	0.216588	1.74772	0.022449	0.0953564	1	1985	tags=36%, list=14%, signal=41%
GOBP_REGULATION_OF_ENDOCYTOSIS	GOBP_REGULATION_OF_ENDOCYTOSIS		329	0.0845624	1.74763	0.0244898	0.0952297	1	3579	tags=33%, list=25%, signal=44%
GOBP_INTRACILIARY_TRANSPORT	GOBP_INTRACILIARY_TRANSPORT		41	0.230429	1.74602	0.0184805	0.0958535	1	5056	tags=59%, list=36%, signal=91%
GOBP_EPITHELIAL_CELL_DIFFERENTIATION_INVOLVED_IN_PROSTATE_GLAND_DEVELOPMENT	GOBP_EPITHELIAL_CELL_DIFFERENTIATION_INVOLVED_IN_PROSTATE_GLAND_DEVELOPMENT		15	0.374626	1.74592	0.0325671	0.0957372	1	7950	tags=93%, list=56%, signal=211%
GOBP_VESICLE_DOCKING_INVOLVED_IN_EXOCYTOSIS	GOBP_VESICLE_DOCKING_INVOLVED_IN_EXOCYTOSIS		33	0.25312	1.74583	0.0271845	0.0956079	1	1579	tags=36%, list=11%, signal=41%
GOBP_DEVELOPMENTAL_MATURATION	GOBP_DEVELOPMENTAL_MATURATION		334	0.0838487	1.74523	0.0167015	0.095767	1	3433	tags=32%, list=24%, signal=42%
GOBP_RECEPTOR_CLUSTERING	GOBP_RECEPTOR_CLUSTERING		71	0.174127	1.74509	0.0172745	0.09566	1	6949	tags=66%, list=49%, signal=129%
GOBP_POSITIVE_REGULATION_OF_MRNA_CATABOLIC_PROCESS	GOBP_POSITIVE_REGULATION_OF_MRNA_CATABOLIC_PROCESS		83	0.162962	1.74437	0.025641	0.0958516	1	9860	tags=86%, list=69%, signal=277%
GOBP_SYNCYTIUM_FORMATION	GOBP_SYNCYTIUM_FORMATION		64	0.184001	1.74405	0.00817996	0.0958268	1	4949	tags=53%, list=35%, signal=81%
GOBP_EYE_PHOTORECEPTOR_CELL_DIFFERENTIATION	GOBP_EYE_PHOTORECEPTOR_CELL_DIFFERENTIATION		52	0.207531	1.7432	0.0185185	0.0960714	1	4169	tags=50%, list=29%, signal=70%
GOBP_POSITIVE_REGULATION_OF_ANIMAL_ORGAN_MORPHOGENESIS	GOBP_POSITIVE_REGULATION_OF_ANIMAL_ORGAN_MORPHOGENESIS		37	0.240456	1.74263	0.0137525	0.0961301	1	2738	tags=43%, list=19%, signal=53%
GOBP_CELLULAR_RESPONSE_TO_UNFOLDED_PROTEIN	GOBP_CELLULAR_RESPONSE_TO_UNFOLDED_PROTEIN		89	0.159935	1.74218	0.0357895	0.0961954	1	9563	tags=83%, list=67%, signal=252%
GOBP_INNER_CELL_MASS_CELL_PROLIFERATION	GOBP_INNER_CELL_MASS_CELL_PROLIFERATION		16	0.36356	1.74097	0.0253411	0.0966532	1	7278	tags=88%, list=51%, signal=179%
GOBP_SERTOLI_CELL_DIFFERENTIATION	GOBP_SERTOLI_CELL_DIFFERENTIATION		30	0.263731	1.7407	0.0135659	0.0966289	1	4789	tags=60%, list=34%, signal=90%
GOBP_RESPONSE_TO_AMINO_ACID_STARVATION	GOBP_RESPONSE_TO_AMINO_ACID_STARVATION		54	0.198527	1.73956	0.0265306	0.0970634	1	9564	tags=87%, list=67%, signal=265%
GOBP_NEGATIVE_REGULATION_OF_SIGNAL_TRANSDUCTION_IN_ABSENCE_OF_LIGAND	GOBP_NEGATIVE_REGULATION_OF_SIGNAL_TRANSDUCTION_IN_ABSENCE_OF_LIGAND		30	0.262885	1.73949	0.0196464	0.0969153	1	4801	tags=60%, list=34%, signal=90%
GOBP_CELLULAR_RESPONSE_TO_CARBOHYDRATE_STIMULUS	GOBP_CELLULAR_RESPONSE_TO_CARBOHYDRATE_STIMULUS		178	0.1084	1.73925	0.0271845	0.0968807	1	1273	tags=20%, list=9%, signal=21%
GOBP_DNA_INTEGRITY_CHECKPOINT_SIGNALING	GOBP_DNA_INTEGRITY_CHECKPOINT_SIGNALING		107	0.144856	1.73912	0.0239044	0.0967655	1	10049	tags=85%, list=71%, signal=288%
GOBP_NEGATIVE_REGULATION_OF_GENE_EXPRESSION_EPIGENETIC	GOBP_NEGATIVE_REGULATION_OF_GENE_EXPRESSION_EPIGENETIC		148	0.125036	1.73796	0.0192678	0.0971778	1	9866	tags=82%, list=69%, signal=264%
GOBP_NEGATIVE_REGULATION_OF_CANONICAL_WNT_SIGNALING_PATHWAY	GOBP_NEGATIVE_REGULATION_OF_CANONICAL_WNT_SIGNALING_PATHWAY		123	0.135289	1.73573	0.0180361	0.0981357	1	5260	tags=50%, list=37%, signal=79%
GOBP_NEGATIVE_REGULATION_OF_BLOOD_VESSEL_ENDOTHELIAL_CELL_MIGRATION	GOBP_NEGATIVE_REGULATION_OF_BLOOD_VESSEL_ENDOTHELIAL_CELL_MIGRATION		34	0.257025	1.73363	0.0273438	0.0990225	1	8064	tags=82%, list=57%, signal=190%
GOBP_MICROTUBULE_ANCHORING	GOBP_MICROTUBULE_ANCHORING		20	0.32772	1.73209	0.017341	0.0995911	1	8855	tags=95%, list=62%, signal=251%
GOBP_POSITIVE_REGULATION_OF_PROTEASOMAL_PROTEIN_CATABOLIC_PROCESS	GOBP_POSITIVE_REGULATION_OF_PROTEASOMAL_PROTEIN_CATABOLIC_PROCESS		102	0.145082	1.7316	0.0159046	0.0996675	1	9662	tags=82%, list=68%, signal=255%
GOBP_RETINA_VASCULATURE_DEVELOPMENT_IN_CAMERA_TYPE_EYE	GOBP_RETINA_VASCULATURE_DEVELOPMENT_IN_CAMERA_TYPE_EYE		20	0.322622	1.73148	0.0241935	0.0995589	1	3239	tags=55%, list=23%, signal=71%
GOBP_POSITIVE_REGULATION_OF_ESTABLISHMENT_OF_PROTEIN_LOCALIZATION	GOBP_POSITIVE_REGULATION_OF_ESTABLISHMENT_OF_PROTEIN_LOCALIZATION		324	0.0835603	1.73112	0.0192308	0.0995829	1	10118	tags=79%, list=71%, signal=269%
GOBP_MAINTENANCE_OF_POSTSYNAPTIC_SPECIALIZATION_STRUCTURE	GOBP_MAINTENANCE_OF_POSTSYNAPTIC_SPECIALIZATION_STRUCTURE		15	0.367577	1.73094	0.0233918	0.0995169	1	6154	tags=80%, list=43%, signal=141%
GOBP_CERAMIDE_BIOSYNTHETIC_PROCESS	GOBP_CERAMIDE_BIOSYNTHETIC_PROCESS		62	0.183395	1.72785	0.0217822	0.100813	1	7724	tags=73%, list=54%, signal=158%
GOBP_OUTFLOW_TRACT_SEPTUM_MORPHOGENESIS	GOBP_OUTFLOW_TRACT_SEPTUM_MORPHOGENESIS		27	0.280024	1.72744	0.0214008	0.100851	1	5505	tags=67%, list=39%, signal=109%
GOBP_CENTRIOLE_ASSEMBLY	GOBP_CENTRIOLE_ASSEMBLY		42	0.226987	1.72686	0.0210728	0.100943	1	7277	tags=74%, list=51%, signal=151%
GOBP_PROTEIN_LOCALIZATION_TO_SYNAPSE	GOBP_PROTEIN_LOCALIZATION_TO_SYNAPSE		94	0.150012	1.72657	0.0227273	0.1009	1	5898	tags=56%, list=41%, signal=96%
GOBP_SPINDLE_ORGANIZATION	GOBP_SPINDLE_ORGANIZATION		172	0.113491	1.72506	0.0255906	0.101477	1	11220	tags=90%, list=79%, signal=422%
GOBP_DENDRITIC_SPINE_MAINTENANCE	GOBP_DENDRITIC_SPINE_MAINTENANCE		25	0.285038	1.72469	0.0258964	0.101476	1	1641	tags=40%, list=12%, signal=45%
GOBP_NEGATIVE_REGULATION_OF_ANOIKIS	GOBP_NEGATIVE_REGULATION_OF_ANOIKIS		15	0.364621	1.72449	0.0292398	0.101403	1	6196	tags=80%, list=44%, signal=142%
GOBP_NUCLEOTIDE_BINDING_OLIGOMERIZATION_DOMAIN_CONTAINING_2_SIGNALING_PATHWAY	GOBP_NUCLEOTIDE_BINDING_OLIGOMERIZATION_DOMAIN_CONTAINING_2_SIGNALING_PATHWAY		16	0.355786	1.72435	0.0186567	0.101345	1	4722	tags=69%, list=33%, signal=103%
GOBP_POSITIVE_REGULATION_OF_PROTEIN_AUTOPHOSPHORYLATION	GOBP_POSITIVE_REGULATION_OF_PROTEIN_AUTOPHOSPHORYLATION		21	0.312555	1.72338	0.014	0.101709	1	3687	tags=57%, list=26%, signal=77%
GOBP_CELL_FATE_DETERMINATION	GOBP_CELL_FATE_DETERMINATION		31	0.26571	1.72277	0.018595	0.101827	1	816	tags=32%, list=6%, signal=34%
GOBP_TOR_SIGNALING	GOBP_TOR_SIGNALING		162	0.113321	1.72198	0.0241449	0.102096	1	10520	tags=85%, list=74%, signal=324%
GOBP_RAC_PROTEIN_SIGNAL_TRANSDUCTION	GOBP_RAC_PROTEIN_SIGNAL_TRANSDUCTION		53	0.196828	1.72033	0.0198807	0.102845	1	4455	tags=51%, list=31%, signal=74%
GOBP_MITOCHONDRION_LOCALIZATION	GOBP_MITOCHONDRION_LOCALIZATION		50	0.20505	1.71973	0.029703	0.103	1	5057	tags=56%, list=36%, signal=87%
GOBP_REGULATION_OF_OSSIFICATION	GOBP_REGULATION_OF_OSSIFICATION		130	0.128741	1.71971	0.0240964	0.10284	1	2670	tags=32%, list=19%, signal=38%
GOBP_RETINAL_GANGLION_CELL_AXON_GUIDANCE	GOBP_RETINAL_GANGLION_CELL_AXON_GUIDANCE		19	0.331521	1.71788	0.0308008	0.103694	1	2027	tags=47%, list=14%, signal=55%
GOBP_NEGATIVE_REGULATION_OF_CARTILAGE_DEVELOPMENT	GOBP_NEGATIVE_REGULATION_OF_CARTILAGE_DEVELOPMENT		28	0.262114	1.71609	0.0273973	0.104548	1	4913	tags=61%, list=35%, signal=93%
GOBP_SYNAPTIC_VESICLE_MEMBRANE_ORGANIZATION	GOBP_SYNAPTIC_VESICLE_MEMBRANE_ORGANIZATION		36	0.243242	1.71583	0.0275591	0.104512	1	2079	tags=39%, list=15%, signal=45%
GOBP_REGULATION_OF_PROTEASOMAL_PROTEIN_CATABOLIC_PROCESS	GOBP_REGULATION_OF_PROTEASOMAL_PROTEIN_CATABOLIC_PROCESS		174	0.1113	1.71523	0.0262626	0.104628	1	8897	tags=74%, list=63%, signal=194%
GOBP_REGULATION_OF_GLYCOPROTEIN_METABOLIC_PROCESS	GOBP_REGULATION_OF_GLYCOPROTEIN_METABOLIC_PROCESS		42	0.217807	1.71483	0.0336634	0.104675	1	5037	tags=57%, list=35%, signal=88%
GOBP_POSITIVE_REGULATION_OF_NEUROBLAST_PROLIFERATION	GOBP_POSITIVE_REGULATION_OF_NEUROBLAST_PROLIFERATION		28	0.273568	1.71436	0.0234834	0.104748	1	6782	tags=75%, list=48%, signal=143%
GOBP_MIRNA_PROCESSING	GOBP_MIRNA_PROCESSING		35	0.242575	1.7142	0.0214844	0.10465	1	7122	tags=74%, list=50%, signal=148%
GOBP_SCHWANN_CELL_DIFFERENTIATION	GOBP_SCHWANN_CELL_DIFFERENTIATION		50	0.205424	1.71307	0.0194175	0.105086	1	9318	tags=86%, list=66%, signal=249%
GOBP_SENSORY_PERCEPTION_OF_PAIN	GOBP_SENSORY_PERCEPTION_OF_PAIN		72	0.172825	1.71261	0.0242915	0.10517	1	1899	tags=31%, list=13%, signal=35%
GOBP_NITRIC_OXIDE_MEDIATED_SIGNAL_TRANSDUCTION	GOBP_NITRIC_OXIDE_MEDIATED_SIGNAL_TRANSDUCTION		21	0.309712	1.71188	0.0303644	0.105408	1	2373	tags=48%, list=17%, signal=57%
GOBP_FOREBRAIN_GENERATION_OF_NEURONS	GOBP_FOREBRAIN_GENERATION_OF_NEURONS		82	0.160039	1.71108	0.0273684	0.105609	1	4153	tags=45%, list=29%, signal=63%
GOBP_EPITHELIAL_TO_MESENCHYMAL_TRANSITION_INVOLVED_IN_ENDOCARDIAL_CUSHION_FORMATION	GOBP_EPITHELIAL_TO_MESENCHYMAL_TRANSITION_INVOLVED_IN_ENDOCARDIAL_CUSHION_FORMATION		17	0.348034	1.71094	0.0294695	0.105501	1	8440	tags=94%, list=59%, signal=231%
GOBP_RESPIRATORY_SYSTEM_PROCESS	GOBP_RESPIRATORY_SYSTEM_PROCESS		42	0.220863	1.70954	0.030303	0.106072	1	9734	tags=90%, list=68%, signal=286%
GOBP_REGULATION_OF_WOUND_HEALING	GOBP_REGULATION_OF_WOUND_HEALING		121	0.133048	1.70941	0.0257426	0.105979	1	2119	tags=28%, list=15%, signal=33%
GOBP_POST_GOLGI_VESICLE_MEDIATED_TRANSPORT	GOBP_POST_GOLGI_VESICLE_MEDIATED_TRANSPORT		95	0.146931	1.70884	0.0247934	0.106147	1	7953	tags=71%, list=56%, signal=159%
GOBP_REGULATION_OF_CYTOPLASMIC_PATTERN_RECOGNITION_RECEPTOR_SIGNALING_PATHWAY	GOBP_REGULATION_OF_CYTOPLASMIC_PATTERN_RECOGNITION_RECEPTOR_SIGNALING_PATHWAY		112	0.139525	1.70755	0.03125	0.106618	1	9585	tags=81%, list=67%, signal=247%
GOBP_SEGMENTATION	GOBP_SEGMENTATION		100	0.14821	1.70671	0.0288066	0.106907	1	1888	tags=28%, list=13%, signal=32%
GOBP_REGULATION_OF_D_GLUCOSE_IMPORT	GOBP_REGULATION_OF_D_GLUCOSE_IMPORT		56	0.194592	1.70589	0.0159681	0.107146	1	4861	tags=54%, list=34%, signal=81%
GOBP_NUCLEOTIDE_BINDING_DOMAIN_LEUCINE_RICH_REPEAT_CONTAINING_RECEPTOR_SIGNALING_PATHWAY	GOBP_NUCLEOTIDE_BINDING_DOMAIN_LEUCINE_RICH_REPEAT_CONTAINING_RECEPTOR_SIGNALING_PATHWAY		20	0.323604	1.7052	0.0285714	0.107306	1	2514	tags=50%, list=18%, signal=61%
GOBP_KIDNEY_EPITHELIUM_DEVELOPMENT	GOBP_KIDNEY_EPITHELIUM_DEVELOPMENT		165	0.11083	1.70517	0.0310559	0.107142	1	2492	tags=28%, list=18%, signal=34%
GOBP_REGULATION_OF_SMOOTHENED_SIGNALING_PATHWAY	GOBP_REGULATION_OF_SMOOTHENED_SIGNALING_PATHWAY		90	0.15729	1.70502	0.0326923	0.107049	1	7257	tags=67%, list=51%, signal=135%
GOBP_MICROTUBULE_BASED_MOVEMENT	GOBP_MICROTUBULE_BASED_MOVEMENT		319	0.0845757	1.70462	0.0303644	0.107089	1	5109	tags=44%, list=36%, signal=67%
GOBP_POSITIVE_REGULATION_OF_NEURAL_PRECURSOR_CELL_PROLIFERATION	GOBP_POSITIVE_REGULATION_OF_NEURAL_PRECURSOR_CELL_PROLIFERATION		62	0.185127	1.70444	0.0254902	0.107012	1	6782	tags=66%, list=48%, signal=126%
GOBP_REGULATION_OF_EARLY_ENDOSOME_TO_LATE_ENDOSOME_TRANSPORT	GOBP_REGULATION_OF_EARLY_ENDOSOME_TO_LATE_ENDOSOME_TRANSPORT		19	0.329642	1.70425	0.0289017	0.106935	1	7293	tags=84%, list=51%, signal=173%
GOBP_CELL_DIFFERENTIATION_INVOLVED_IN_KIDNEY_DEVELOPMENT	GOBP_CELL_DIFFERENTIATION_INVOLVED_IN_KIDNEY_DEVELOPMENT		61	0.18615	1.70272	0.0251451	0.107624	1	2492	tags=36%, list=18%, signal=44%
GOBP_EXTRACELLULAR_VESICLE_BIOGENESIS	GOBP_EXTRACELLULAR_VESICLE_BIOGENESIS		23	0.298646	1.70242	0.0283976	0.107621	1	6270	tags=74%, list=44%, signal=132%
GOBP_HEART_MORPHOGENESIS	GOBP_HEART_MORPHOGENESIS		263	0.0905345	1.70145	0.0173745	0.107964	1	5981	tags=51%, list=42%, signal=86%
GOBP_NEGATIVE_REGULATION_OF_INTRACELLULAR_STEROID_HORMONE_RECEPTOR_SIGNALING_PATHWAY	GOBP_NEGATIVE_REGULATION_OF_INTRACELLULAR_STEROID_HORMONE_RECEPTOR_SIGNALING_PATHWAY		36	0.233827	1.70106	0.0258449	0.108023	1	8533	tags=83%, list=60%, signal=208%
GOBP_CYTOPLASMIC_MICROTUBULE_ORGANIZATION	GOBP_CYTOPLASMIC_MICROTUBULE_ORGANIZATION		61	0.184555	1.70019	0.0282828	0.1083	1	8576	tags=79%, list=60%, signal=197%
GOBP_EXOCRINE_SYSTEM_DEVELOPMENT	GOBP_EXOCRINE_SYSTEM_DEVELOPMENT		58	0.189809	1.69825	0.0176817	0.109165	1	5402	tags=57%, list=38%, signal=91%
GOBP_DENDRITIC_SPINE_DEVELOPMENT	GOBP_DENDRITIC_SPINE_DEVELOPMENT		134	0.127379	1.69734	0.0301811	0.109474	1	6058	tags=55%, list=43%, signal=95%
GOBP_LOCOMOTORY_BEHAVIOR	GOBP_LOCOMOTORY_BEHAVIOR		233	0.0964981	1.69637	0.0374753	0.109836	1	3654	tags=35%, list=26%, signal=47%
GOBP_LATE_ENDOSOME_TO_VACUOLE_TRANSPORT_VIA_MULTIVESICULAR_BODY_SORTING_PATHWAY	GOBP_LATE_ENDOSOME_TO_VACUOLE_TRANSPORT_VIA_MULTIVESICULAR_BODY_SORTING_PATHWAY		16	0.350805	1.69635	0.020202	0.109665	1	8348	tags=94%, list=59%, signal=227%
GOBP_OUTFLOW_TRACT_MORPHOGENESIS	GOBP_OUTFLOW_TRACT_MORPHOGENESIS		86	0.155219	1.69577	0.0245399	0.109827	1	6073	tags=58%, list=43%, signal=101%
GOBP_NEUTRAL_LIPID_BIOSYNTHETIC_PROCESS	GOBP_NEUTRAL_LIPID_BIOSYNTHETIC_PROCESS		51	0.202777	1.6949	0.026465	0.110119	1	7164	tags=71%, list=50%, signal=142%
GOBP_GANGLIOSIDE_METABOLIC_PROCESS	GOBP_GANGLIOSIDE_METABOLIC_PROCESS		27	0.277799	1.69437	0.0270833	0.110253	1	6590	tags=74%, list=46%, signal=138%
GOBP_AMINE_TRANSPORT	GOBP_AMINE_TRANSPORT		94	0.146724	1.69428	0.0255403	0.110108	1	3070	tags=36%, list=22%, signal=46%
GOBP_NEGATIVE_REGULATION_OF_REGULATED_SECRETORY_PATHWAY	GOBP_NEGATIVE_REGULATION_OF_REGULATED_SECRETORY_PATHWAY		22	0.294355	1.69413	0.0173077	0.110015	1	6162	tags=73%, list=43%, signal=128%
GOBP_POSITIVE_REGULATION_OF_DOUBLE_STRAND_BREAK_REPAIR_VIA_HOMOLOGOUS_RECOMBINATION	GOBP_POSITIVE_REGULATION_OF_DOUBLE_STRAND_BREAK_REPAIR_VIA_HOMOLOGOUS_RECOMBINATION		39	0.230726	1.69374	0.0121212	0.11007	1	8760	tags=85%, list=62%, signal=220%
GOBP_COGNITION	GOBP_COGNITION		328	0.0815571	1.69369	0.0198807	0.109922	1	5803	tags=49%, list=41%, signal=81%
GOBP_RESPIRATORY_SYSTEM_DEVELOPMENT	GOBP_RESPIRATORY_SYSTEM_DEVELOPMENT		258	0.0934052	1.69352	0.0162272	0.109834	1	4758	tags=43%, list=33%, signal=63%
GOBP_NEGATIVE_REGULATION_OF_CELLULAR_RESPONSE_TO_GROWTH_FACTOR_STIMULUS	GOBP_NEGATIVE_REGULATION_OF_CELLULAR_RESPONSE_TO_GROWTH_FACTOR_STIMULUS		95	0.152952	1.69344	0.0184843	0.1097	1	6371	tags=60%, list=45%, signal=108%
GOBP_ANTERIOR_POSTERIOR_PATTERN_SPECIFICATION	GOBP_ANTERIOR_POSTERIOR_PATTERN_SPECIFICATION		202	0.104311	1.68946	0.0322581	0.111653	1	7900	tags=66%, list=56%, signal=146%
GOBP_REGULATION_OF_SYNAPSE_MATURATION	GOBP_REGULATION_OF_SYNAPSE_MATURATION		26	0.2795	1.68901	0.0321932	0.111716	1	3142	tags=50%, list=22%, signal=64%
GOBP_REGULATION_OF_CATECHOLAMINE_SECRETION	GOBP_REGULATION_OF_CATECHOLAMINE_SECRETION		40	0.221841	1.68892	0.026	0.111574	1	2897	tags=43%, list=20%, signal=53%
GOBP_RETINAL_ROD_CELL_DIFFERENTIATION	GOBP_RETINAL_ROD_CELL_DIFFERENTIATION		20	0.322287	1.68876	0.0283401	0.111469	1	6799	tags=80%, list=48%, signal=153%
GOBP_REGULATION_OF_CELL_SUBSTRATE_ADHESION	GOBP_REGULATION_OF_CELL_SUBSTRATE_ADHESION		213	0.100157	1.68698	0.0222672	0.112265	1	6274	tags=54%, list=44%, signal=95%
GOBP_CGMP_MEDIATED_SIGNALING	GOBP_CGMP_MEDIATED_SIGNALING		29	0.264386	1.68582	0.0309478	0.11275	1	1641	tags=38%, list=12%, signal=43%
GOBP_POSITIVE_REGULATION_OF_PROTEOLYSIS	GOBP_POSITIVE_REGULATION_OF_PROTEOLYSIS		201	0.102473	1.6853	0.0372671	0.112892	1	8326	tags=69%, list=59%, signal=163%
GOBP_REGULATION_OF_PEPTIDYL_TYROSINE_PHOSPHORYLATION	GOBP_REGULATION_OF_PEPTIDYL_TYROSINE_PHOSPHORYLATION		211	0.0975451	1.68439	0.0263692	0.113179	1	5507	tags=48%, list=39%, signal=78%
GOBP_ENDOPLASMIC_RETICULUM_ORGANIZATION	GOBP_ENDOPLASMIC_RETICULUM_ORGANIZATION		76	0.162363	1.68434	0.0430328	0.113032	1	8181	tags=74%, list=58%, signal=173%
GOBP_REGULATION_OF_GLIOGENESIS	GOBP_REGULATION_OF_GLIOGENESIS		125	0.129208	1.68384	0.034749	0.113123	1	4890	tags=47%, list=34%, signal=71%
GOBP_MODULATION_OF_EXCITATORY_POSTSYNAPTIC_POTENTIAL	GOBP_MODULATION_OF_EXCITATORY_POSTSYNAPTIC_POTENTIAL		48	0.207293	1.6823	0.0375	0.113787	1	3579	tags=46%, list=25%, signal=61%
GOBP_CELL_CYCLE_CHECKPOINT_SIGNALING	GOBP_CELL_CYCLE_CHECKPOINT_SIGNALING		166	0.111535	1.68183	0.0326531	0.11387	1	10682	tags=86%, list=75%, signal=342%
GOBP_NEGATIVE_REGULATION_OF_CHONDROCYTE_DIFFERENTIATION	GOBP_NEGATIVE_REGULATION_OF_CHONDROCYTE_DIFFERENTIATION		22	0.297172	1.68119	0.0261569	0.11406	1	6122	tags=73%, list=43%, signal=128%
GOBP_NEGATIVE_REGULATION_OF_APOPTOTIC_SIGNALING_PATHWAY	GOBP_NEGATIVE_REGULATION_OF_APOPTOTIC_SIGNALING_PATHWAY		232	0.0975566	1.68116	0.0220884	0.113906	1	7645	tags=63%, list=54%, signal=135%
GOBP_GLYCOSPHINGOLIPID_BIOSYNTHETIC_PROCESS	GOBP_GLYCOSPHINGOLIPID_BIOSYNTHETIC_PROCESS		30	0.255972	1.68	0.029703	0.11443	1	3477	tags=50%, list=24%, signal=66%
GOBP_REGULATION_OF_D_GLUCOSE_TRANSMEMBRANE_TRANSPORT	GOBP_REGULATION_OF_D_GLUCOSE_TRANSMEMBRANE_TRANSPORT		73	0.165812	1.67952	0.0357853	0.114519	1	4861	tags=51%, list=34%, signal=77%
GOBP_REGULATED_EXOCYTOSIS	GOBP_REGULATED_EXOCYTOSIS		231	0.0960699	1.67855	0.0280561	0.11487	1	2595	tags=28%, list=18%, signal=33%
GOBP_ADENYLATE_CYCLASE_ACTIVATING_G_PROTEIN_COUPLED_RECEPTOR_SIGNALING_PATHWAY	GOBP_ADENYLATE_CYCLASE_ACTIVATING_G_PROTEIN_COUPLED_RECEPTOR_SIGNALING_PATHWAY		111	0.135443	1.67844	0.0252918	0.114765	1	2572	tags=32%, list=18%, signal=38%
GOBP_POSITIVE_REGULATION_OF_CALCIUM_ION_DEPENDENT_EXOCYTOSIS	GOBP_POSITIVE_REGULATION_OF_CALCIUM_ION_DEPENDENT_EXOCYTOSIS		20	0.314446	1.67754	0.0222672	0.115064	1	1933	tags=45%, list=14%, signal=52%
GOBP_CELLULAR_RESPONSE_TO_MONOAMINE_STIMULUS	GOBP_CELLULAR_RESPONSE_TO_MONOAMINE_STIMULUS		39	0.225908	1.67652	0.0257937	0.115425	1	4088	tags=51%, list=29%, signal=72%
GOBP_HYPOTHALAMUS_DEVELOPMENT	GOBP_HYPOTHALAMUS_DEVELOPMENT		16	0.345055	1.67639	0.0322581	0.115346	1	2208	tags=50%, list=16%, signal=59%
GOBP_PHAGOCYTOSIS_RECOGNITION	GOBP_PHAGOCYTOSIS_RECOGNITION		27	0.269117	1.67593	0.0192308	0.115424	1	3553	tags=52%, list=25%, signal=69%
GOBP_CENTRAL_NERVOUS_SYSTEM_NEURON_DEVELOPMENT	GOBP_CENTRAL_NERVOUS_SYSTEM_NEURON_DEVELOPMENT		87	0.16007	1.6747	0.0359281	0.115913	1	8198	tags=74%, list=58%, signal=173%
GOBP_REGULATION_OF_PROTEIN_BINDING	GOBP_REGULATION_OF_PROTEIN_BINDING		166	0.113425	1.67328	0.0341365	0.116509	1	6372	tags=56%, list=45%, signal=100%
GOBP_NOTCH_SIGNALING_PATHWAY	GOBP_NOTCH_SIGNALING_PATHWAY		175	0.105973	1.67317	0.0364683	0.116398	1	4849	tags=45%, list=34%, signal=67%
GOBP_MORPHOGENESIS_OF_AN_EPITHELIAL_SHEET	GOBP_MORPHOGENESIS_OF_AN_EPITHELIAL_SHEET		60	0.180114	1.67255	0.0306748	0.116593	1	5981	tags=60%, list=42%, signal=103%
GOBP_SALIVARY_GLAND_DEVELOPMENT	GOBP_SALIVARY_GLAND_DEVELOPMENT		43	0.21005	1.67162	0.0264766	0.117	1	1651	tags=33%, list=12%, signal=37%
GOBP_VESICLE_DOCKING	GOBP_VESICLE_DOCKING		50	0.199037	1.67152	0.038835	0.116874	1	2298	tags=36%, list=16%, signal=43%
GOBP_SIGNAL_TRANSDUCTION_IN_RESPONSE_TO_DNA_DAMAGE	GOBP_SIGNAL_TRANSDUCTION_IN_RESPONSE_TO_DNA_DAMAGE		172	0.110564	1.67121	0.0216535	0.116912	1	8450	tags=70%, list=59%, signal=171%
GOBP_CALCIUM_INDEPENDENT_CELL_CELL_ADHESION_VIA_PLASMA_MEMBRANE_CELL_ADHESION_MOLECULES	GOBP_CALCIUM_INDEPENDENT_CELL_CELL_ADHESION_VIA_PLASMA_MEMBRANE_CELL_ADHESION_MOLECULES		25	0.281798	1.67094	0.026971	0.116875	1	1687	tags=40%, list=12%, signal=45%
GOBP_PITUITARY_GLAND_DEVELOPMENT	GOBP_PITUITARY_GLAND_DEVELOPMENT		27	0.269652	1.67085	0.0284553	0.116728	1	2492	tags=44%, list=18%, signal=54%
GOBP_CARDIAC_SEPTUM_MORPHOGENESIS	GOBP_CARDIAC_SEPTUM_MORPHOGENESIS		73	0.162762	1.66908	0.0237154	0.117591	1	6073	tags=59%, list=43%, signal=102%
GOBP_ESTABLISHMENT_OF_PROTEIN_LOCALIZATION_TO_VACUOLE	GOBP_ESTABLISHMENT_OF_PROTEIN_LOCALIZATION_TO_VACUOLE		51	0.197125	1.66739	0.0358566	0.118393	1	9196	tags=84%, list=65%, signal=238%
GOBP_NEGATIVE_REGULATION_OF_PROTEIN_SERINE_THREONINE_KINASE_ACTIVITY	GOBP_NEGATIVE_REGULATION_OF_PROTEIN_SERINE_THREONINE_KINASE_ACTIVITY		86	0.153595	1.66657	0.0220441	0.11873	1	8411	tags=74%, list=59%, signal=181%
GOBP_POSITIVE_REGULATION_OF_CELL_JUNCTION_ASSEMBLY	GOBP_POSITIVE_REGULATION_OF_CELL_JUNCTION_ASSEMBLY		112	0.135115	1.6661	0.0325866	0.118794	1	5965	tags=55%, list=42%, signal=95%
GOBP_DIGESTIVE_SYSTEM_DEVELOPMENT	GOBP_DIGESTIVE_SYSTEM_DEVELOPMENT		144	0.117814	1.66468	0.0199275	0.119456	1	5056	tags=47%, list=36%, signal=73%
GOBP_ESTABLISHMENT_OF_TISSUE_POLARITY	GOBP_ESTABLISHMENT_OF_TISSUE_POLARITY		35	0.241492	1.66466	0.0240964	0.11929	1	7950	tags=80%, list=56%, signal=181%
GOBP_HIPPOCAMPUS_DEVELOPMENT	GOBP_HIPPOCAMPUS_DEVELOPMENT		86	0.153377	1.66451	0.0342052	0.119201	1	7918	tags=71%, list=56%, signal=159%
GOBP_REGULATION_OF_CELL_CELL_ADHESION_MEDIATED_BY_CADHERIN	GOBP_REGULATION_OF_CELL_CELL_ADHESION_MEDIATED_BY_CADHERIN		15	0.355399	1.66433	0.0273438	0.119117	1	6327	tags=80%, list=44%, signal=144%
GOBP_RNA_METHYLATION	GOBP_RNA_METHYLATION		53	0.19505	1.66378	0.0244898	0.119241	1	8505	tags=79%, list=60%, signal=196%
GOBP_CAMERA_TYPE_EYE_PHOTORECEPTOR_CELL_DIFFERENTIATION	GOBP_CAMERA_TYPE_EYE_PHOTORECEPTOR_CELL_DIFFERENTIATION		34	0.236749	1.66377	0.0425101	0.11908	1	4169	tags=53%, list=29%, signal=75%
GOBP_AMEBOIDAL_TYPE_CELL_MIGRATION	GOBP_AMEBOIDAL_TYPE_CELL_MIGRATION		255	0.0913294	1.66321	0.0250482	0.119207	1	1735	tags=21%, list=12%, signal=24%
GOBP_POSITIVE_REGULATION_OF_VASCULAR_PERMEABILITY	GOBP_POSITIVE_REGULATION_OF_VASCULAR_PERMEABILITY		19	0.317709	1.66306	0.03	0.119111	1	6714	tags=79%, list=47%, signal=149%
GOBP_NEGATIVE_ADAPTATION_OF_SIGNALING_PATHWAY	GOBP_NEGATIVE_ADAPTATION_OF_SIGNALING_PATHWAY		19	0.308882	1.66259	0.0294695	0.119227	1	3097	tags=53%, list=22%, signal=67%
GOBP_GLANDULAR_EPITHELIAL_CELL_DIFFERENTIATION	GOBP_GLANDULAR_EPITHELIAL_CELL_DIFFERENTIATION		33	0.24261	1.66239	0.0425101	0.119154	1	2590	tags=42%, list=18%, signal=52%
GOBP_CARDIAC_CHAMBER_MORPHOGENESIS	GOBP_CARDIAC_CHAMBER_MORPHOGENESIS		131	0.122191	1.66234	0.0274841	0.118996	1	5225	tags=49%, list=37%, signal=77%
GOBP_MAINTENANCE_OF_BLOOD_BRAIN_BARRIER	GOBP_MAINTENANCE_OF_BLOOD_BRAIN_BARRIER		20	0.314323	1.66121	0.0254237	0.119512	1	5490	tags=70%, list=39%, signal=114%
GOBP_NEURAL_RETINA_DEVELOPMENT	GOBP_NEURAL_RETINA_DEVELOPMENT		74	0.163425	1.66107	0.0325203	0.119414	1	4221	tags=46%, list=30%, signal=65%
GOBP_POSITIVE_REGULATION_OF_INFLAMMATORY_RESPONSE_TO_ANTIGENIC_STIMULUS	GOBP_POSITIVE_REGULATION_OF_INFLAMMATORY_RESPONSE_TO_ANTIGENIC_STIMULUS		15	0.356784	1.66095	0.0292969	0.11931	1	1567	tags=47%, list=11%, signal=52%
GOBP_NEGATIVE_REGULATION_OF_ESTABLISHMENT_OF_PROTEIN_LOCALIZATION	GOBP_NEGATIVE_REGULATION_OF_ESTABLISHMENT_OF_PROTEIN_LOCALIZATION		147	0.117069	1.65786	0.0447471	0.120914	1	8219	tags=69%, list=58%, signal=163%
GOBP_AMYLOID_BETA_CLEARANCE	GOBP_AMYLOID_BETA_CLEARANCE		39	0.225635	1.6572	0.046332	0.121109	1	7009	tags=72%, list=49%, signal=141%
GOBP_NEUROMUSCULAR_JUNCTION_DEVELOPMENT	GOBP_NEUROMUSCULAR_JUNCTION_DEVELOPMENT		63	0.176974	1.65691	0.0329218	0.121104	1	2008	tags=32%, list=14%, signal=37%
GOBP_ENDOCRINE_SYSTEM_DEVELOPMENT	GOBP_ENDOCRINE_SYSTEM_DEVELOPMENT		122	0.129884	1.65541	0.0318091	0.121784	1	4812	tags=47%, list=34%, signal=70%
GOBP_ARTERY_MORPHOGENESIS	GOBP_ARTERY_MORPHOGENESIS		77	0.160203	1.65536	0.0368852	0.12164	1	5490	tags=55%, list=39%, signal=88%
GOBP_COPII_COATED_VESICLE_BUDDING	GOBP_COPII_COATED_VESICLE_BUDDING		33	0.237762	1.65301	0.0391389	0.122793	1	8261	tags=82%, list=58%, signal=195%
GOBP_REGULATION_OF_RUFFLE_ASSEMBLY	GOBP_REGULATION_OF_RUFFLE_ASSEMBLY		29	0.253202	1.6527	0.0357143	0.122787	1	4742	tags=59%, list=33%, signal=88%
GOBP_REGULATION_OF_COAGULATION	GOBP_REGULATION_OF_COAGULATION		71	0.165972	1.65226	0.0392927	0.122888	1	2057	tags=31%, list=14%, signal=36%
GOBP_GLOMERULAR_EPITHELIUM_DEVELOPMENT	GOBP_GLOMERULAR_EPITHELIUM_DEVELOPMENT		28	0.264617	1.65222	0.0276134	0.122731	1	2338	tags=43%, list=16%, signal=51%
GOBP_CELL_RECOGNITION	GOBP_CELL_RECOGNITION		129	0.125048	1.65157	0.0264766	0.122987	1	1985	tags=26%, list=14%, signal=30%
GOBP_REGULATION_OF_PROTEIN_UBIQUITINATION	GOBP_REGULATION_OF_PROTEIN_UBIQUITINATION		189	0.103955	1.65	0.0301724	0.123788	1	10504	tags=84%, list=74%, signal=318%
GOBP_REGULATION_OF_PROTEIN_SUMOYLATION	GOBP_REGULATION_OF_PROTEIN_SUMOYLATION		24	0.277479	1.64868	0.0410448	0.124397	1	8503	tags=88%, list=60%, signal=217%
GOBP_INSULIN_SECRETION_INVOLVED_IN_CELLULAR_RESPONSE_TO_GLUCOSE_STIMULUS	GOBP_INSULIN_SECRETION_INVOLVED_IN_CELLULAR_RESPONSE_TO_GLUCOSE_STIMULUS		92	0.14701	1.64668	0.037037	0.125511	1	6269	tags=59%, list=44%, signal=104%
GOBP_NUCLEOTIDE_SUGAR_BIOSYNTHETIC_PROCESS	GOBP_NUCLEOTIDE_SUGAR_BIOSYNTHETIC_PROCESS		27	0.265957	1.64588	0.0352505	0.125849	1	10445	tags=100%, list=73%, signal=376%
GOBP_REGULATION_OF_ACUTE_INFLAMMATORY_RESPONSE	GOBP_REGULATION_OF_ACUTE_INFLAMMATORY_RESPONSE		48	0.202925	1.64498	0.0283401	0.126255	1	1567	tags=31%, list=11%, signal=35%
GOBP_NEGATIVE_REGULATION_OF_AUTOPHAGY	GOBP_NEGATIVE_REGULATION_OF_AUTOPHAGY		85	0.156356	1.64491	0.0413386	0.126117	1	10504	tags=89%, list=74%, signal=340%
GOBP_AUDITORY_RECEPTOR_CELL_STEREOCILIUM_ORGANIZATION	GOBP_AUDITORY_RECEPTOR_CELL_STEREOCILIUM_ORGANIZATION		17	0.336053	1.64441	0.0444015	0.126229	1	3591	tags=59%, list=25%, signal=79%
GOBP_NEUROEPITHELIAL_CELL_DIFFERENTIATION	GOBP_NEUROEPITHELIAL_CELL_DIFFERENTIATION		41	0.217493	1.6442	0.0541667	0.126164	1	6280	tags=66%, list=44%, signal=118%
GOBP_LUNG_MORPHOGENESIS	GOBP_LUNG_MORPHOGENESIS		70	0.169422	1.64418	0.0383142	0.125994	1	8572	tags=77%, list=60%, signal=193%
GOBP_POSITIVE_REGULATION_OF_PROTEIN_SUMOYLATION	GOBP_POSITIVE_REGULATION_OF_PROTEIN_SUMOYLATION		16	0.339894	1.64061	0.0371901	0.127969	1	8503	tags=94%, list=60%, signal=233%
GOBP_NEGATIVE_REGULATION_OF_KERATINOCYTE_PROLIFERATION	GOBP_NEGATIVE_REGULATION_OF_KERATINOCYTE_PROLIFERATION		26	0.268006	1.64028	0.0437376	0.128009	1	5493	tags=65%, list=39%, signal=106%
GOBP_NEGATIVE_REGULATION_OF_PROTEIN_MATURATION	GOBP_NEGATIVE_REGULATION_OF_PROTEIN_MATURATION		22	0.293369	1.63856	0.0526316	0.128903	1	6176	tags=73%, list=43%, signal=128%
GOBP_LAMELLIPODIUM_ASSEMBLY	GOBP_LAMELLIPODIUM_ASSEMBLY		66	0.175426	1.6361	0.035124	0.130275	1	3549	tags=42%, list=25%, signal=56%
GOBP_TEMPERATURE_HOMEOSTASIS	GOBP_TEMPERATURE_HOMEOSTASIS		181	0.106869	1.63531	0.0450098	0.130579	1	2977	tags=31%, list=21%, signal=39%
GOBP_REGULATION_OF_MYOBLAST_FUSION	GOBP_REGULATION_OF_MYOBLAST_FUSION		22	0.292367	1.63518	0.03861	0.130483	1	4251	tags=59%, list=30%, signal=84%
GOBP_TORC1_SIGNALING	GOBP_TORC1_SIGNALING		104	0.14033	1.63468	0.033195	0.130599	1	11692	tags=96%, list=82%, signal=537%
GOBP_NEGATIVE_REGULATION_OF_ENDOTHELIAL_CELL_MIGRATION	GOBP_NEGATIVE_REGULATION_OF_ENDOTHELIAL_CELL_MIGRATION		50	0.193561	1.63443	0.0359281	0.130598	1	8064	tags=76%, list=57%, signal=175%
GOBP_REGULATION_OF_MRNA_CATABOLIC_PROCESS	GOBP_REGULATION_OF_MRNA_CATABOLIC_PROCESS		157	0.110823	1.63425	0.0338645	0.130509	1	9944	tags=81%, list=70%, signal=266%
GOBP_GLOMERULAR_MESANGIUM_DEVELOPMENT	GOBP_GLOMERULAR_MESANGIUM_DEVELOPMENT		19	0.31145	1.63392	0.0279441	0.130523	1	3809	tags=58%, list=27%, signal=79%
GOBP_CELL_PROLIFERATION_INVOLVED_IN_KIDNEY_DEVELOPMENT	GOBP_CELL_PROLIFERATION_INVOLVED_IN_KIDNEY_DEVELOPMENT		24	0.278589	1.63333	0.0351562	0.130709	1	4932	tags=63%, list=35%, signal=96%
GOBP_POSITIVE_REGULATION_OF_STEM_CELL_POPULATION_MAINTENANCE	GOBP_POSITIVE_REGULATION_OF_STEM_CELL_POPULATION_MAINTENANCE		47	0.199146	1.63219	0.0295276	0.131253	1	10187	tags=91%, list=72%, signal=321%
GOBP_REGULATION_OF_INFLAMMATORY_RESPONSE	GOBP_REGULATION_OF_INFLAMMATORY_RESPONSE		351	0.0740439	1.63186	0.0262626	0.131287	1	2821	tags=27%, list=20%, signal=33%
GOBP_REGULATION_OF_RESPONSE_TO_WOUNDING	GOBP_REGULATION_OF_RESPONSE_TO_WOUNDING		163	0.109853	1.63113	0.0568421	0.131596	1	2119	tags=26%, list=15%, signal=30%
GOBP_NUCLEOBASE_CONTAINING_COMPOUND_TRANSPORT	GOBP_NUCLEOBASE_CONTAINING_COMPOUND_TRANSPORT		188	0.104187	1.63078	0.0325866	0.13168	1	11472	tags=91%, list=81%, signal=464%
GOBP_REGULATION_OF_SYNCYTIUM_FORMATION_BY_PLASMA_MEMBRANE_FUSION	GOBP_REGULATION_OF_SYNCYTIUM_FORMATION_BY_PLASMA_MEMBRANE_FUSION		31	0.249937	1.63057	0.0416667	0.131634	1	4251	tags=55%, list=30%, signal=78%
GOBP_LAMELLIPODIUM_ORGANIZATION	GOBP_LAMELLIPODIUM_ORGANIZATION		84	0.14997	1.63038	0.0357143	0.131588	1	3635	tags=40%, list=26%, signal=54%
GOBP_APOPTOTIC_DNA_FRAGMENTATION	GOBP_APOPTOTIC_DNA_FRAGMENTATION		20	0.307369	1.63027	0.0350877	0.131474	1	9144	tags=95%, list=64%, signal=266%
GOBP_REGULATION_OF_TELOMERE_MAINTENANCE_IN_RESPONSE_TO_DNA_DAMAGE	GOBP_REGULATION_OF_TELOMERE_MAINTENANCE_IN_RESPONSE_TO_DNA_DAMAGE		19	0.319573	1.62869	0.0463158	0.132313	1	7436	tags=84%, list=52%, signal=176%
GOBP_NEURON_FATE_COMMITMENT	GOBP_NEURON_FATE_COMMITMENT		67	0.170809	1.62855	0.0329457	0.132209	1	4798	tags=51%, list=34%, signal=76%
GOBP_NEGATIVE_REGULATION_OF_TORC1_SIGNALING	GOBP_NEGATIVE_REGULATION_OF_TORC1_SIGNALING		41	0.216624	1.62843	0.0292969	0.13209	1	9414	tags=88%, list=66%, signal=259%
GOBP_MAINTENANCE_OF_PROTEIN_LOCATION_IN_CELL	GOBP_MAINTENANCE_OF_PROTEIN_LOCATION_IN_CELL		59	0.181287	1.627	0.0503018	0.132801	1	7314	tags=69%, list=51%, signal=142%
GOBP_REGULATION_OF_PROTEIN_AUTOPHOSPHORYLATION	GOBP_REGULATION_OF_PROTEIN_AUTOPHOSPHORYLATION		37	0.227744	1.62544	0.0486815	0.133615	1	3687	tags=49%, list=26%, signal=66%
GOBP_POSITIVE_REGULATION_OF_SECRETION	GOBP_POSITIVE_REGULATION_OF_SECRETION		361	0.0751094	1.62538	0.0227743	0.133493	1	5970	tags=49%, list=42%, signal=83%
GOBP_ANTIGEN_PROCESSING_AND_PRESENTATION	GOBP_ANTIGEN_PROCESSING_AND_PRESENTATION		105	0.136044	1.62368	0.0296443	0.134313	1	1600	tags=25%, list=11%, signal=28%
GOBP_BRANCHING_INVOLVED_IN_SALIVARY_GLAND_MORPHOGENESIS	GOBP_BRANCHING_INVOLVED_IN_SALIVARY_GLAND_MORPHOGENESIS		27	0.258276	1.62212	0.0332031	0.135075	1	5287	tags=63%, list=37%, signal=100%
GOBP_REGULATION_OF_CELLULAR_RESPONSE_TO_INSULIN_STIMULUS	GOBP_REGULATION_OF_CELLULAR_RESPONSE_TO_INSULIN_STIMULUS		91	0.149377	1.62096	0.0425963	0.135659	1	10234	tags=87%, list=72%, signal=308%
GOBP_SOMITE_DEVELOPMENT	GOBP_SOMITE_DEVELOPMENT		82	0.155227	1.62001	0.04	0.136066	1	7863	tags=71%, list=55%, signal=157%
GOBP_SYNAPTIC_VESICLE_PRIMING	GOBP_SYNAPTIC_VESICLE_PRIMING		31	0.240356	1.61838	0.0283401	0.136958	1	2552	tags=42%, list=18%, signal=51%
GOBP_MODIFICATION_OF_SYNAPTIC_STRUCTURE	GOBP_MODIFICATION_OF_SYNAPTIC_STRUCTURE		52	0.187521	1.61831	0.0398406	0.136825	1	4726	tags=52%, list=33%, signal=77%
GOBP_AXON_EXTENSION	GOBP_AXON_EXTENSION		121	0.128754	1.61793	0.0507812	0.136864	1	6058	tags=55%, list=43%, signal=96%
GOBP_CARDIAC_EPITHELIAL_TO_MESENCHYMAL_TRANSITION	GOBP_CARDIAC_EPITHELIAL_TO_MESENCHYMAL_TRANSITION		36	0.225841	1.6175	0.0432099	0.136954	1	4696	tags=56%, list=33%, signal=83%
GOBP_MUSCLE_CELL_DIFFERENTIATION	GOBP_MUSCLE_CELL_DIFFERENTIATION		436	0.0674733	1.61721	0.0333333	0.136976	1	4679	tags=39%, list=33%, signal=57%
GOBP_RETROGRADE_AXONAL_TRANSPORT	GOBP_RETROGRADE_AXONAL_TRANSPORT		22	0.289636	1.61699	0.0406977	0.136904	1	6229	tags=73%, list=44%, signal=129%
GOBP_SPECIFICATION_OF_SYMMETRY	GOBP_SPECIFICATION_OF_SYMMETRY		107	0.131748	1.61473	0.0295983	0.138265	1	5981	tags=55%, list=42%, signal=94%
GOBP_ARF_PROTEIN_SIGNAL_TRANSDUCTION	GOBP_ARF_PROTEIN_SIGNAL_TRANSDUCTION		19	0.315104	1.61443	0.0539419	0.13827	1	6751	tags=79%, list=47%, signal=150%
GOBP_MICROTUBULE_CYTOSKELETON_ORGANIZATION_INVOLVED_IN_MITOSIS	GOBP_MICROTUBULE_CYTOSKELETON_ORGANIZATION_INVOLVED_IN_MITOSIS		142	0.113497	1.61383	0.0322581	0.138468	1	11220	tags=90%, list=79%, signal=423%
GOBP_FACE_DEVELOPMENT	GOBP_FACE_DEVELOPMENT		57	0.182654	1.61324	0.0366089	0.138686	1	8639	tags=79%, list=61%, signal=200%
GOBP_REPRODUCTIVE_SYSTEM_DEVELOPMENT	GOBP_REPRODUCTIVE_SYSTEM_DEVELOPMENT		313	0.0775443	1.61318	0.0408998	0.138546	1	4827	tags=42%, list=34%, signal=61%
GOBP_REGULATION_OF_RESPONSE_TO_ENDOPLASMIC_RETICULUM_STRESS	GOBP_REGULATION_OF_RESPONSE_TO_ENDOPLASMIC_RETICULUM_STRESS		81	0.150928	1.61261	0.0435644	0.138756	1	5941	tags=57%, list=42%, signal=97%
GOBP_LABYRINTHINE_LAYER_MORPHOGENESIS	GOBP_LABYRINTHINE_LAYER_MORPHOGENESIS		25	0.270363	1.6122	0.0261044	0.13887	1	2987	tags=48%, list=21%, signal=61%
GOBP_REGULATION_OF_HEMATOPOIETIC_STEM_CELL_DIFFERENTIATION	GOBP_REGULATION_OF_HEMATOPOIETIC_STEM_CELL_DIFFERENTIATION		16	0.332035	1.61129	0.0456274	0.13927	1	6837	tags=81%, list=48%, signal=156%
GOBP_REGULATION_OF_REGULATED_SECRETORY_PATHWAY	GOBP_REGULATION_OF_REGULATED_SECRETORY_PATHWAY		141	0.115763	1.61098	0.0433925	0.139287	1	6236	tags=55%, list=44%, signal=98%
GOBP_POSITIVE_REGULATION_OF_RUFFLE_ASSEMBLY	GOBP_POSITIVE_REGULATION_OF_RUFFLE_ASSEMBLY		15	0.338786	1.60879	0.0454545	0.140597	1	6563	tags=80%, list=46%, signal=148%
GOBP_DIENCEPHALON_DEVELOPMENT	GOBP_DIENCEPHALON_DEVELOPMENT		62	0.173578	1.60507	0.0519751	0.142904	1	7863	tags=73%, list=55%, signal=162%
GOBP_RESPONSE_TO_FIBROBLAST_GROWTH_FACTOR	GOBP_RESPONSE_TO_FIBROBLAST_GROWTH_FACTOR		145	0.112598	1.60457	0.0598802	0.143069	1	4789	tags=45%, list=34%, signal=67%
GOBP_PRIMARY_MIRNA_PROCESSING	GOBP_PRIMARY_MIRNA_PROCESSING		16	0.336387	1.60337	0.0377734	0.14368	1	7664	tags=88%, list=54%, signal=190%
GOBP_NEPHRON_DEVELOPMENT	GOBP_NEPHRON_DEVELOPMENT		173	0.103699	1.60328	0.032538	0.14353	1	4543	tags=42%, list=32%, signal=61%
GOBP_REGULATION_OF_HORMONE_BIOSYNTHETIC_PROCESS	GOBP_REGULATION_OF_HORMONE_BIOSYNTHETIC_PROCESS		30	0.241674	1.60282	0.036965	0.143662	1	5102	tags=60%, list=36%, signal=93%
GOBP_SPHINGOLIPID_BIOSYNTHETIC_PROCESS	GOBP_SPHINGOLIPID_BIOSYNTHETIC_PROCESS		87	0.148979	1.6028	0.0502092	0.143479	1	7374	tags=67%, list=52%, signal=138%
GOBP_POSITIVE_REGULATION_OF_FAT_CELL_DIFFERENTIATION	GOBP_POSITIVE_REGULATION_OF_FAT_CELL_DIFFERENTIATION		66	0.166138	1.60219	0.0438931	0.143755	1	3465	tags=41%, list=24%, signal=54%
GOBP_POSITIVE_REGULATION_OF_ENDOCYTOSIS	GOBP_POSITIVE_REGULATION_OF_ENDOCYTOSIS		187	0.101516	1.60205	0.0455408	0.143652	1	5951	tags=52%, list=42%, signal=88%
GOBP_REGULATION_OF_CELL_MATRIX_ADHESION	GOBP_REGULATION_OF_CELL_MATRIX_ADHESION		120	0.126555	1.60055	0.0397614	0.144426	1	6036	tags=55%, list=42%, signal=95%
GOBP_POSITIVE_REGULATION_OF_ACUTE_INFLAMMATORY_RESPONSE	GOBP_POSITIVE_REGULATION_OF_ACUTE_INFLAMMATORY_RESPONSE		28	0.24737	1.60008	0.0525292	0.144493	1	1567	tags=36%, list=11%, signal=40%
GOBP_STRESS_FIBER_ASSEMBLY	GOBP_STRESS_FIBER_ASSEMBLY		115	0.128723	1.59921	0.0474308	0.14495	1	3006	tags=34%, list=21%, signal=43%
GOBP_CARDIAC_VENTRICLE_DEVELOPMENT	GOBP_CARDIAC_VENTRICLE_DEVELOPMENT		133	0.115514	1.5979	0.0433071	0.145642	1	6391	tags=56%, list=45%, signal=101%
GOBP_ESTABLISHMENT_OF_MITOCHONDRION_LOCALIZATION_MICROTUBULE_MEDIATED	GOBP_ESTABLISHMENT_OF_MITOCHONDRION_LOCALIZATION_MICROTUBULE_MEDIATED		21	0.293625	1.59625	0.0522244	0.1466	1	4633	tags=62%, list=33%, signal=92%
GOBP_POSITIVE_REGULATION_OF_PATTERN_RECOGNITION_RECEPTOR_SIGNALING_PATHWAY	GOBP_POSITIVE_REGULATION_OF_PATTERN_RECOGNITION_RECEPTOR_SIGNALING_PATHWAY		74	0.158139	1.5953	0.0280778	0.147046	1	8908	tags=78%, list=63%, signal=209%
GOBP_P38MAPK_CASCADE	GOBP_P38MAPK_CASCADE		60	0.173675	1.5927	0.0533881	0.148634	1	3465	tags=42%, list=24%, signal=55%
GOBP_REGULATION_OF_VACUOLE_ORGANIZATION	GOBP_REGULATION_OF_VACUOLE_ORGANIZATION		56	0.181742	1.59161	0.0510204	0.149168	1	9868	tags=88%, list=69%, signal=285%
GOBP_REGULATION_OF_CYTOSKELETON_ORGANIZATION	GOBP_REGULATION_OF_CYTOSKELETON_ORGANIZATION		473	0.0629858	1.59112	0.0449219	0.149298	1	4605	tags=38%, list=32%, signal=55%
GOBP_MESENCHYME_MORPHOGENESIS	GOBP_MESENCHYME_MORPHOGENESIS		60	0.169105	1.59042	0.0340426	0.149547	1	7559	tags=70%, list=53%, signal=149%
GOBP_PHOSPHOLIPID_TRANSPORT	GOBP_PHOSPHOLIPID_TRANSPORT		89	0.140787	1.5901	0.0381526	0.149574	1	2803	tags=34%, list=20%, signal=42%
GOBP_CARBOHYDRATE_HOMEOSTASIS	GOBP_CARBOHYDRATE_HOMEOSTASIS		284	0.0822342	1.58988	0.0286885	0.14953	1	3660	tags=34%, list=26%, signal=45%
GOBP_REGULATION_OF_PROTEIN_SERINE_THREONINE_KINASE_ACTIVITY	GOBP_REGULATION_OF_PROTEIN_SERINE_THREONINE_KINASE_ACTIVITY		239	0.0878158	1.58983	0.0542798	0.149363	1	8470	tags=68%, list=60%, signal=166%
GOBP_HEPARIN_PROTEOGLYCAN_METABOLIC_PROCESS	GOBP_HEPARIN_PROTEOGLYCAN_METABOLIC_PROCESS		17	0.315607	1.58955	0.0418327	0.149372	1	6391	tags=76%, list=45%, signal=139%
GOBP_LENS_DEVELOPMENT_IN_CAMERA_TYPE_EYE	GOBP_LENS_DEVELOPMENT_IN_CAMERA_TYPE_EYE		73	0.161732	1.58842	0.0434783	0.149941	1	6672	tags=63%, list=47%, signal=118%
GOBP_CELL_DIFFERENTIATION_IN_SPINAL_CORD	GOBP_CELL_DIFFERENTIATION_IN_SPINAL_CORD		41	0.214381	1.58809	0.0643777	0.149955	1	4243	tags=51%, list=30%, signal=73%
GOBP_REGULATION_OF_INSULIN_LIKE_GROWTH_FACTOR_RECEPTOR_SIGNALING_PATHWAY	GOBP_REGULATION_OF_INSULIN_LIKE_GROWTH_FACTOR_RECEPTOR_SIGNALING_PATHWAY		20	0.294676	1.58701	0.05	0.150561	1	5769	tags=70%, list=41%, signal=118%
GOBP_CELLULAR_SENESCENCE	GOBP_CELLULAR_SENESCENCE		87	0.146398	1.58584	0.0537849	0.151143	1	9372	tags=80%, list=66%, signal=235%
GOBP_SEMINIFEROUS_TUBULE_DEVELOPMENT	GOBP_SEMINIFEROUS_TUBULE_DEVELOPMENT		20	0.293775	1.58492	0.0574949	0.151597	1	8626	tags=90%, list=61%, signal=228%
GOBP_AXIS_SPECIFICATION	GOBP_AXIS_SPECIFICATION		86	0.146914	1.58466	0.0467836	0.151552	1	7844	tags=70%, list=55%, signal=155%
GOBP_RESPONSE_TO_LIGHT_STIMULUS	GOBP_RESPONSE_TO_LIGHT_STIMULUS		287	0.0798801	1.58415	0.0348361	0.151766	1	8251	tags=66%, list=58%, signal=154%
GOBP_REGULATION_OF_MACROAUTOPHAGY	GOBP_REGULATION_OF_MACROAUTOPHAGY		132	0.119132	1.58376	0.0633397	0.151844	1	11141	tags=90%, list=78%, signal=412%
GOBP_MICROTUBULE_POLYMERIZATION_OR_DEPOLYMERIZATION	GOBP_MICROTUBULE_POLYMERIZATION_OR_DEPOLYMERIZATION		120	0.123081	1.58348	0.0475285	0.151853	1	6322	tags=57%, list=44%, signal=101%
GOBP_POLARIZED_EPITHELIAL_CELL_DIFFERENTIATION	GOBP_POLARIZED_EPITHELIAL_CELL_DIFFERENTIATION		22	0.286694	1.58194	0.0408602	0.152724	1	8210	tags=86%, list=58%, signal=204%
GOBP_MYOTUBE_DIFFERENTIATION	GOBP_MYOTUBE_DIFFERENTIATION		127	0.120807	1.5816	0.0560166	0.152795	1	4679	tags=45%, list=33%, signal=66%
GOBP_IMMATURE_T_CELL_PROLIFERATION	GOBP_IMMATURE_T_CELL_PROLIFERATION		18	0.314331	1.58091	0.0348837	0.153096	1	1855	tags=44%, list=13%, signal=51%
GOBP_ANTIGEN_PROCESSING_AND_PRESENTATION_OF_EXOGENOUS_PEPTIDE_ANTIGEN	GOBP_ANTIGEN_PROCESSING_AND_PRESENTATION_OF_EXOGENOUS_PEPTIDE_ANTIGEN		32	0.237189	1.58072	0.061144	0.153062	1	1522	tags=34%, list=11%, signal=38%
GOBP_ENDODERM_DEVELOPMENT	GOBP_ENDODERM_DEVELOPMENT		78	0.153025	1.58051	0.0368852	0.152972	1	8774	tags=77%, list=62%, signal=200%
GOBP_SKELETAL_MUSCLE_SATELLITE_CELL_PROLIFERATION	GOBP_SKELETAL_MUSCLE_SATELLITE_CELL_PROLIFERATION		17	0.314588	1.57993	0.0445344	0.153229	1	7242	tags=82%, list=51%, signal=168%
GOBP_ENDOCHONDRAL_BONE_MORPHOGENESIS	GOBP_ENDOCHONDRAL_BONE_MORPHOGENESIS		64	0.1713	1.57801	0.0551181	0.154486	1	4240	tags=47%, list=30%, signal=66%
GOBP_POSITIVE_REGULATION_OF_NEURON_PROJECTION_DEVELOPMENT	GOBP_POSITIVE_REGULATION_OF_NEURON_PROJECTION_DEVELOPMENT		212	0.0956515	1.57723	0.046	0.154836	1	6172	tags=53%, list=43%, signal=92%
GOBP_REGULATION_OF_AXONOGENESIS	GOBP_REGULATION_OF_AXONOGENESIS		159	0.105975	1.57629	0.0521042	0.155365	1	5664	tags=50%, list=40%, signal=83%
GOBP_RESPIRATORY_GASEOUS_EXCHANGE_BY_RESPIRATORY_SYSTEM	GOBP_RESPIRATORY_GASEOUS_EXCHANGE_BY_RESPIRATORY_SYSTEM		65	0.167151	1.57573	0.0591966	0.155553	1	3540	tags=42%, list=25%, signal=55%
GOBP_REGULATION_OF_ENDOTHELIAL_CELL_DEVELOPMENT	GOBP_REGULATION_OF_ENDOTHELIAL_CELL_DEVELOPMENT		19	0.29849	1.57254	0.0393701	0.157638	1	5490	tags=68%, list=39%, signal=111%
GOBP_REGULATION_OF_APOPTOTIC_SIGNALING_PATHWAY	GOBP_REGULATION_OF_APOPTOTIC_SIGNALING_PATHWAY		392	0.070131	1.57176	0.0582707	0.157986	1	7228	tags=58%, list=51%, signal=114%
GOBP_FOREBRAIN_NEURON_DEVELOPMENT	GOBP_FOREBRAIN_NEURON_DEVELOPMENT		35	0.224823	1.57042	0.0390625	0.158815	1	3717	tags=49%, list=26%, signal=66%
GOBP_BLASTOCYST_GROWTH	GOBP_BLASTOCYST_GROWTH		28	0.250239	1.56983	0.0605469	0.15904	1	7621	tags=79%, list=54%, signal=169%
GOBP_PROTEIN_CONTAINING_COMPLEX_DISASSEMBLY	GOBP_PROTEIN_CONTAINING_COMPLEX_DISASSEMBLY		225	0.088196	1.56957	0.0472279	0.159027	1	10015	tags=79%, list=70%, signal=263%
GOBP_INTRACELLULAR_MONOATOMIC_ION_HOMEOSTASIS	GOBP_INTRACELLULAR_MONOATOMIC_ION_HOMEOSTASIS		487	0.0625998	1.56884	0.0578842	0.159401	1	2585	tags=24%, list=18%, signal=29%
GOBP_ANIMAL_ORGAN_FORMATION	GOBP_ANIMAL_ORGAN_FORMATION		69	0.159396	1.56856	0.0406504	0.159416	1	7430	tags=68%, list=52%, signal=142%
GOBP_REGULATION_OF_PRESYNAPTIC_MEMBRANE_POTENTIAL	GOBP_REGULATION_OF_PRESYNAPTIC_MEMBRANE_POTENTIAL		22	0.281463	1.56847	0.0511247	0.1593	1	3113	tags=50%, list=22%, signal=64%
GOBP_ORGAN_GROWTH	GOBP_ORGAN_GROWTH		194	0.0958325	1.56811	0.0557769	0.159374	1	4739	tags=43%, list=33%, signal=63%
GOBP_NEGATIVE_REGULATION_OF_TRANSMEMBRANE_RECEPTOR_PROTEIN_SERINE_THREONINE_KINASE_SIGNALING_PATHWAY	GOBP_NEGATIVE_REGULATION_OF_TRANSMEMBRANE_RECEPTOR_PROTEIN_SERINE_THREONINE_KINASE_SIGNALING_PATHWAY		140	0.113932	1.56723	0.042	0.15982	1	8451	tags=71%, list=59%, signal=173%
GOBP_SYNAPTIC_VESICLE_RECYCLING	GOBP_SYNAPTIC_VESICLE_RECYCLING		94	0.137363	1.5668	0.046729	0.159953	1	7287	tags=65%, list=51%, signal=132%
GOBP_MALE_GAMETE_GENERATION	GOBP_MALE_GAMETE_GENERATION		458	0.0641693	1.5668	0.0402414	0.159756	1	7872	tags=62%, list=55%, signal=133%
GOBP_MRNA_TRANSCRIPTION	GOBP_MRNA_TRANSCRIPTION		50	0.185428	1.56447	0.0483871	0.16133	1	7326	tags=70%, list=52%, signal=144%
GOBP_SERTOLI_CELL_DEVELOPMENT	GOBP_SERTOLI_CELL_DEVELOPMENT		22	0.272871	1.56312	0.0512821	0.162104	1	3235	tags=50%, list=23%, signal=65%
GOBP_REGULATION_OF_T_CELL_MEDIATED_CYTOTOXICITY	GOBP_REGULATION_OF_T_CELL_MEDIATED_CYTOTOXICITY		42	0.201618	1.5631	0.0538922	0.161915	1	1542	tags=31%, list=11%, signal=35%
GOBP_POSITIVE_REGULATION_OF_RESPONSE_TO_CYTOKINE_STIMULUS	GOBP_POSITIVE_REGULATION_OF_RESPONSE_TO_CYTOKINE_STIMULUS		62	0.166197	1.56158	0.0536481	0.162881	1	8885	tags=79%, list=62%, signal=210%
GOBP_ASTROCYTE_ACTIVATION	GOBP_ASTROCYTE_ACTIVATION		20	0.300947	1.56029	0.0538922	0.163627	1	6391	tags=75%, list=45%, signal=136%
GOBP_NEURON_PROJECTION_EXTENSION_INVOLVED_IN_NEURON_PROJECTION_GUIDANCE	GOBP_NEURON_PROJECTION_EXTENSION_INVOLVED_IN_NEURON_PROJECTION_GUIDANCE		22	0.277001	1.56026	0.0335968	0.163441	1	5762	tags=68%, list=41%, signal=114%
GOBP_REGULATION_OF_EXTRINSIC_APOPTOTIC_SIGNALING_PATHWAY_IN_ABSENCE_OF_LIGAND	GOBP_REGULATION_OF_EXTRINSIC_APOPTOTIC_SIGNALING_PATHWAY_IN_ABSENCE_OF_LIGAND		43	0.204011	1.56013	0.0587084	0.163316	1	6036	tags=63%, list=42%, signal=109%
GOBP_CEREBELLAR_CORTEX_FORMATION	GOBP_CEREBELLAR_CORTEX_FORMATION		27	0.25026	1.55954	0.0564202	0.163575	1	8561	tags=85%, list=60%, signal=214%
GOBP_NOTOCHORD_DEVELOPMENT	GOBP_NOTOCHORD_DEVELOPMENT		21	0.27605	1.55939	0.0515873	0.163475	1	2851	tags=48%, list=20%, signal=59%
GOBP_BLASTOCYST_FORMATION	GOBP_BLASTOCYST_FORMATION		52	0.181534	1.55743	0.0625	0.164802	1	9460	tags=85%, list=67%, signal=252%
GOBP_REGULATION_OF_PROTEIN_TYROSINE_KINASE_ACTIVITY	GOBP_REGULATION_OF_PROTEIN_TYROSINE_KINASE_ACTIVITY		49	0.191509	1.55736	0.0458167	0.164644	1	5121	tags=55%, list=36%, signal=86%
GOBP_INSULIN_RECEPTOR_SIGNALING_PATHWAY	GOBP_INSULIN_RECEPTOR_SIGNALING_PATHWAY		178	0.0992053	1.55735	0.0537849	0.164451	1	5237	tags=47%, list=37%, signal=73%
GOBP_MALE_MEIOTIC_NUCLEAR_DIVISION	GOBP_MALE_MEIOTIC_NUCLEAR_DIVISION		39	0.209538	1.55677	0.0451866	0.164718	1	6508	tags=67%, list=46%, signal=123%
GOBP_CEREBELLAR_PURKINJE_CELL_LAYER_DEVELOPMENT	GOBP_CEREBELLAR_PURKINJE_CELL_LAYER_DEVELOPMENT		32	0.227273	1.55645	0.0597302	0.164779	1	9662	tags=91%, list=68%, signal=282%
GOBP_PEROXISOMAL_TRANSPORT	GOBP_PEROXISOMAL_TRANSPORT		21	0.283283	1.556	0.0443038	0.164949	1	8843	tags=90%, list=62%, signal=239%
GOBP_MIDBRAIN_DEVELOPMENT	GOBP_MIDBRAIN_DEVELOPMENT		41	0.207136	1.55564	0.0448065	0.165044	1	6080	tags=63%, list=43%, signal=110%
GOBP_POSITIVE_REGULATION_OF_ORGANELLE_ASSEMBLY	GOBP_POSITIVE_REGULATION_OF_ORGANELLE_ASSEMBLY		85	0.145658	1.55523	0.0531697	0.165181	1	9986	tags=85%, list=70%, signal=283%
GOBP_SPINDLE_LOCALIZATION	GOBP_SPINDLE_LOCALIZATION		55	0.17939	1.55517	0.0634249	0.165021	1	8576	tags=78%, list=60%, signal=196%
GOBP_ANDROGEN_RECEPTOR_SIGNALING_PATHWAY	GOBP_ANDROGEN_RECEPTOR_SIGNALING_PATHWAY		41	0.201856	1.5538	0.0604288	0.165896	1	8236	tags=78%, list=58%, signal=185%
GOBP_MEMBRANE_LIPID_METABOLIC_PROCESS	GOBP_MEMBRANE_LIPID_METABOLIC_PROCESS		176	0.101526	1.55281	0.0459082	0.166424	1	7946	tags=66%, list=56%, signal=148%
GOBP_TRANSCRIPTION_BY_RNA_POLYMERASE_III	GOBP_TRANSCRIPTION_BY_RNA_POLYMERASE_III		55	0.174625	1.5525	0.0657371	0.166458	1	10712	tags=93%, list=75%, signal=374%
GOBP_CHEMICAL_SYNAPTIC_TRANSMISSION_POSTSYNAPTIC	GOBP_CHEMICAL_SYNAPTIC_TRANSMISSION_POSTSYNAPTIC		97	0.134697	1.55245	0.0515464	0.166296	1	6160	tags=57%, list=43%, signal=99%
GOBP_MESONEPHRIC_TUBULE_MORPHOGENESIS	GOBP_MESONEPHRIC_TUBULE_MORPHOGENESIS		73	0.154967	1.55219	0.0637066	0.16628	1	4430	tags=47%, list=31%, signal=67%
GOBP_MAINTENANCE_OF_CELL_NUMBER	GOBP_MAINTENANCE_OF_CELL_NUMBER		199	0.0951878	1.55218	0.0530452	0.166084	1	8669	tags=70%, list=61%, signal=178%
GOBP_REGULATION_OF_GLIAL_CELL_DIFFERENTIATION	GOBP_REGULATION_OF_GLIAL_CELL_DIFFERENTIATION		83	0.14185	1.55093	0.0571429	0.166851	1	3819	tags=41%, list=27%, signal=56%
GOBP_ENDOCRINE_PANCREAS_DEVELOPMENT	GOBP_ENDOCRINE_PANCREAS_DEVELOPMENT		46	0.191163	1.5501	0.0377359	0.167305	1	2854	tags=39%, list=20%, signal=49%
GOBP_POSITIVE_REGULATION_OF_COLD_INDUCED_THERMOGENESIS	GOBP_POSITIVE_REGULATION_OF_COLD_INDUCED_THERMOGENESIS		93	0.134308	1.55003	0.0483871	0.167151	1	2536	tags=31%, list=18%, signal=38%
GOBP_PEROXISOME_PROLIFERATOR_ACTIVATED_RECEPTOR_SIGNALING_PATHWAY	GOBP_PEROXISOME_PROLIFERATOR_ACTIVATED_RECEPTOR_SIGNALING_PATHWAY		29	0.238422	1.55001	0.0449219	0.166962	1	3971	tags=52%, list=28%, signal=72%
GOBP_PROTEIN_AUTOPHOSPHORYLATION	GOBP_PROTEIN_AUTOPHOSPHORYLATION		186	0.0990044	1.54896	0.062	0.167538	1	6561	tags=56%, list=46%, signal=102%
GOBP_CELL_DIFFERENTIATION_INVOLVED_IN_METANEPHROS_DEVELOPMENT	GOBP_CELL_DIFFERENTIATION_INVOLVED_IN_METANEPHROS_DEVELOPMENT		24	0.264252	1.54886	0.0472441	0.16741	1	4543	tags=58%, list=32%, signal=86%
GOBP_HEAD_MORPHOGENESIS	GOBP_HEAD_MORPHOGENESIS		43	0.199876	1.54695	0.0491159	0.168632	1	10394	tags=93%, list=73%, signal=345%
GOBP_COLLAGEN_METABOLIC_PROCESS	GOBP_COLLAGEN_METABOLIC_PROCESS		107	0.131132	1.54666	0.0721443	0.168649	1	4129	tags=42%, list=29%, signal=59%
GOBP_DNA_REPAIR_DEPENDENT_CHROMATIN_REMODELING	GOBP_DNA_REPAIR_DEPENDENT_CHROMATIN_REMODELING		20	0.292719	1.54614	0.0588235	0.168839	1	8641	tags=90%, list=61%, signal=229%
GOBP_REGULATION_OF_MICROTUBULE_POLYMERIZATION_OR_DEPOLYMERIZATION	GOBP_REGULATION_OF_MICROTUBULE_POLYMERIZATION_OR_DEPOLYMERIZATION		81	0.148816	1.54605	0.0590551	0.168691	1	6322	tags=59%, list=44%, signal=106%
GOBP_MICROTUBULE_ORGANIZING_CENTER_LOCALIZATION	GOBP_MICROTUBULE_ORGANIZING_CENTER_LOCALIZATION		32	0.233163	1.5452	0.0518962	0.169133	1	6912	tags=72%, list=49%, signal=140%
GOBP_REGULATION_OF_INTRACELLULAR_PROTEIN_TRANSPORT	GOBP_REGULATION_OF_INTRACELLULAR_PROTEIN_TRANSPORT		160	0.105618	1.545	0.0678295	0.169072	1	10424	tags=84%, list=73%, signal=310%
GOBP_REGULATION_OF_HIPPO_SIGNALING	GOBP_REGULATION_OF_HIPPO_SIGNALING		35	0.224177	1.54495	0.0625	0.168918	1	7383	tags=74%, list=52%, signal=154%
GOBP_REGULATION_OF_RAS_PROTEIN_SIGNAL_TRANSDUCTION	GOBP_REGULATION_OF_RAS_PROTEIN_SIGNAL_TRANSDUCTION		53	0.184287	1.54227	0.0578512	0.170759	1	4901	tags=53%, list=34%, signal=80%
GOBP_REGULATION_OF_NEUROTRANSMITTER_RECEPTOR_ACTIVITY	GOBP_REGULATION_OF_NEUROTRANSMITTER_RECEPTOR_ACTIVITY		25	0.263471	1.54192	0.0708661	0.170808	1	2516	tags=44%, list=18%, signal=53%
GOBP_HEART_FORMATION	GOBP_HEART_FORMATION		32	0.227976	1.54055	0.0609244	0.171652	1	7430	tags=75%, list=52%, signal=157%
GOBP_DORSAL_VENTRAL_NEURAL_TUBE_PATTERNING	GOBP_DORSAL_VENTRAL_NEURAL_TUBE_PATTERNING		30	0.236899	1.54049	0.0542636	0.171512	1	8488	tags=83%, list=60%, signal=206%
GOBP_VIRION_ASSEMBLY	GOBP_VIRION_ASSEMBLY		25	0.253671	1.54043	0.0575397	0.171368	1	6637	tags=72%, list=47%, signal=135%
GOBP_SEMI_LUNAR_VALVE_DEVELOPMENT	GOBP_SEMI_LUNAR_VALVE_DEVELOPMENT		41	0.203148	1.54037	0.0422833	0.171209	1	5096	tags=56%, list=36%, signal=87%
GOBP_SMOOTH_MUSCLE_CELL_PROLIFERATION	GOBP_SMOOTH_MUSCLE_CELL_PROLIFERATION		189	0.0969473	1.53951	0.0564854	0.171726	1	5862	tags=51%, list=41%, signal=85%
GOBP_NON_PROTEINOGENIC_AMINO_ACID_BIOSYNTHETIC_PROCESS	GOBP_NON_PROTEINOGENIC_AMINO_ACID_BIOSYNTHETIC_PROCESS		16	0.320965	1.53911	0.0564202	0.171832	1	3439	tags=56%, list=24%, signal=74%
GOBP_POSITIVE_REGULATION_OF_SYNAPTIC_VESICLE_FUSION_TO_PRESYNAPTIC_ACTIVE_ZONE_MEMBRANE	GOBP_POSITIVE_REGULATION_OF_SYNAPTIC_VESICLE_FUSION_TO_PRESYNAPTIC_ACTIVE_ZONE_MEMBRANE		18	0.299471	1.53834	0.0573614	0.172194	1	1276	tags=39%, list=9%, signal=43%
GOBP_COPII_COATED_VESICLE_CARGO_LOADING	GOBP_COPII_COATED_VESICLE_CARGO_LOADING		17	0.30484	1.53724	0.0571992	0.172835	1	8217	tags=88%, list=58%, signal=209%
GOBP_NEPHRON_EPITHELIUM_DEVELOPMENT	GOBP_NEPHRON_EPITHELIUM_DEVELOPMENT		129	0.115826	1.53497	0.0520833	0.174376	1	4430	tags=43%, list=31%, signal=61%
GOBP_NEGATIVE_REGULATION_OF_GLIAL_CELL_DIFFERENTIATION	GOBP_NEGATIVE_REGULATION_OF_GLIAL_CELL_DIFFERENTIATION		34	0.216041	1.53485	0.0601942	0.174268	1	3208	tags=44%, list=23%, signal=57%
GOBP_TOLL_LIKE_RECEPTOR_4_SIGNALING_PATHWAY	GOBP_TOLL_LIKE_RECEPTOR_4_SIGNALING_PATHWAY		59	0.1709	1.53432	0.0637899	0.174488	1	6738	tags=64%, list=47%, signal=122%
GOBP_REGULATION_OF_STEM_CELL_POPULATION_MAINTENANCE	GOBP_REGULATION_OF_STEM_CELL_POPULATION_MAINTENANCE		71	0.157621	1.53397	0.0555556	0.17458	1	10187	tags=87%, list=72%, signal=306%
GOBP_NEUROBLAST_PROLIFERATION	GOBP_NEUROBLAST_PROLIFERATION		73	0.153957	1.53391	0.0657084	0.174425	1	6782	tags=63%, list=48%, signal=120%
GOBP_FIBROBLAST_MIGRATION	GOBP_FIBROBLAST_MIGRATION		63	0.168114	1.53279	0.0557851	0.175115	1	10034	tags=87%, list=71%, signal=295%
GOBP_PHOTOTRANSDUCTION	GOBP_PHOTOTRANSDUCTION		20	0.288818	1.53176	0.0633663	0.175674	1	3008	tags=50%, list=21%, signal=63%
GOBP_POSITIVE_REGULATION_OF_TRANSMEMBRANE_RECEPTOR_PROTEIN_SERINE_THREONINE_KINASE_SIGNALING_PATHWAY	GOBP_POSITIVE_REGULATION_OF_TRANSMEMBRANE_RECEPTOR_PROTEIN_SERINE_THREONINE_KINASE_SIGNALING_PATHWAY		100	0.130341	1.53049	0.0564972	0.176445	1	8682	tags=74%, list=61%, signal=189%
GOBP_MITOTIC_SPINDLE_ORGANIZATION	GOBP_MITOTIC_SPINDLE_ORGANIZATION		113	0.123441	1.52982	0.0390144	0.176729	1	11220	tags=91%, list=79%, signal=429%
GOBP_VESICLE_CYTOSKELETAL_TRAFFICKING	GOBP_VESICLE_CYTOSKELETAL_TRAFFICKING		51	0.179544	1.52808	0.0719844	0.177906	1	6099	tags=61%, list=43%, signal=106%
GOBP_STARTLE_RESPONSE	GOBP_STARTLE_RESPONSE		29	0.237285	1.52785	0.0673469	0.177881	1	2516	tags=41%, list=18%, signal=50%
GOBP_REGULATION_OF_CELL_PROLIFERATION_INVOLVED_IN_KIDNEY_DEVELOPMENT	GOBP_REGULATION_OF_CELL_PROLIFERATION_INVOLVED_IN_KIDNEY_DEVELOPMENT		17	0.300537	1.52448	0.0531496	0.180414	1	4932	tags=65%, list=35%, signal=99%
GOBP_SPINDLE_ASSEMBLY	GOBP_SPINDLE_ASSEMBLY		118	0.120163	1.52187	0.0643275	0.182321	1	10115	tags=83%, list=71%, signal=285%
GOBP_N_GLYCAN_PROCESSING	GOBP_N_GLYCAN_PROCESSING		17	0.306703	1.52087	0.0623742	0.182877	1	7354	tags=82%, list=52%, signal=170%
GOBP_NEGATIVE_REGULATION_OF_NERVOUS_SYSTEM_DEVELOPMENT	GOBP_NEGATIVE_REGULATION_OF_NERVOUS_SYSTEM_DEVELOPMENT		152	0.104934	1.52085	0.0559006	0.182685	1	3762	tags=37%, list=26%, signal=50%
GOBP_POSITIVE_REGULATION_OF_TRANSCRIPTION_BY_RNA_POLYMERASE_III	GOBP_POSITIVE_REGULATION_OF_TRANSCRIPTION_BY_RNA_POLYMERASE_III		17	0.298611	1.52084	0.0567951	0.182486	1	9142	tags=94%, list=64%, signal=263%
GOBP_PROTEIN_N_LINKED_GLYCOSYLATION	GOBP_PROTEIN_N_LINKED_GLYCOSYLATION		63	0.162307	1.51784	0.054878	0.184808	1	6956	tags=65%, list=49%, signal=127%
GOBP_POSITIVE_REGULATION_OF_UBIQUITIN_DEPENDENT_PROTEIN_CATABOLIC_PROCESS	GOBP_POSITIVE_REGULATION_OF_UBIQUITIN_DEPENDENT_PROTEIN_CATABOLIC_PROCESS		94	0.138779	1.51763	0.0526316	0.184782	1	8326	tags=72%, list=59%, signal=173%
GOBP_CARDIAC_MUSCLE_CELL_PROLIFERATION	GOBP_CARDIAC_MUSCLE_CELL_PROLIFERATION		62	0.163023	1.51759	0.0571429	0.184589	1	5260	tags=53%, list=37%, signal=84%
GOBP_NEGATIVE_REGULATION_OF_CELL_CYCLE	GOBP_NEGATIVE_REGULATION_OF_CELL_CYCLE		331	0.0728917	1.51747	0.0622642	0.18448	1	10286	tags=79%, list=72%, signal=280%
GOBP_LACTATION	GOBP_LACTATION		36	0.212106	1.51729	0.0598802	0.184401	1	7261	tags=72%, list=51%, signal=147%
GOBP_RNA_LOCALIZATION	GOBP_RNA_LOCALIZATION		156	0.103306	1.51679	0.0622568	0.184585	1	10488	tags=84%, list=74%, signal=316%
GOBP_TRANSCRIPTION_PREINITIATION_COMPLEX_ASSEMBLY	GOBP_TRANSCRIPTION_PREINITIATION_COMPLEX_ASSEMBLY		65	0.160932	1.5155	0.06	0.185461	1	9754	tags=85%, list=69%, signal=268%
GOBP_PEPTIDYL_SERINE_MODIFICATION	GOBP_PEPTIDYL_SERINE_MODIFICATION		189	0.0952931	1.51492	0.0496894	0.18573	1	8293	tags=68%, list=58%, signal=160%
GOBP_REGULATION_OF_PRESYNAPTIC_CYTOSOLIC_CALCIUM_ION_CONCENTRATION	GOBP_REGULATION_OF_PRESYNAPTIC_CYTOSOLIC_CALCIUM_ION_CONCENTRATION		22	0.273124	1.51424	0.0639535	0.186076	1	2585	tags=45%, list=18%, signal=55%
GOBP_MAINTENANCE_OF_PROTEIN_LOCATION	GOBP_MAINTENANCE_OF_PROTEIN_LOCATION		70	0.151885	1.51392	0.0563674	0.186144	1	8617	tags=76%, list=61%, signal=191%
GOBP_RIBOSOME_DISASSEMBLY	GOBP_RIBOSOME_DISASSEMBLY		32	0.221904	1.51347	0.0630975	0.186306	1	10627	tags=97%, list=75%, signal=382%
GOBP_NUCLEAR_TRANSCRIBED_MRNA_CATABOLIC_PROCESS_DEADENYLATION_DEPENDENT_DECAY	GOBP_NUCLEAR_TRANSCRIBED_MRNA_CATABOLIC_PROCESS_DEADENYLATION_DEPENDENT_DECAY		46	0.192154	1.51294	0.0758483	0.186528	1	9023	tags=83%, list=63%, signal=225%
GOBP_TELOMERE_MAINTENANCE_IN_RESPONSE_TO_DNA_DAMAGE	GOBP_TELOMERE_MAINTENANCE_IN_RESPONSE_TO_DNA_DAMAGE		30	0.236403	1.51235	0.0562249	0.186764	1	8021	tags=80%, list=56%, signal=183%
GOBP_VENTRAL_SPINAL_CORD_DEVELOPMENT	GOBP_VENTRAL_SPINAL_CORD_DEVELOPMENT		40	0.203829	1.51029	0.0735587	0.188357	1	4219	tags=50%, list=30%, signal=71%
GOBP_MRNA_3_END_PROCESSING	GOBP_MRNA_3_END_PROCESSING		41	0.203356	1.51024	0.0693642	0.188186	1	9949	tags=90%, list=70%, signal=300%
GOBP_REPLACEMENT_OSSIFICATION	GOBP_REPLACEMENT_OSSIFICATION		35	0.216598	1.5099	0.0574713	0.188219	1	4240	tags=51%, list=30%, signal=73%
GOBP_NEGATIVE_REGULATION_OF_MICROTUBULE_POLYMERIZATION_OR_DEPOLYMERIZATION	GOBP_NEGATIVE_REGULATION_OF_MICROTUBULE_POLYMERIZATION_OR_DEPOLYMERIZATION		41	0.197919	1.50881	0.0747475	0.188921	1	5517	tags=59%, list=39%, signal=95%
GOBP_POSITIVE_REGULATION_OF_EXCITATORY_POSTSYNAPTIC_POTENTIAL	GOBP_POSITIVE_REGULATION_OF_EXCITATORY_POSTSYNAPTIC_POTENTIAL		33	0.218401	1.50868	0.0583333	0.188831	1	6381	tags=67%, list=45%, signal=121%
GOBP_PROTEIN_LOCALIZATION_TO_ENDOPLASMIC_RETICULUM	GOBP_PROTEIN_LOCALIZATION_TO_ENDOPLASMIC_RETICULUM		73	0.149901	1.50764	0.0675676	0.189498	1	7229	tags=66%, list=51%, signal=133%
GOBP_REGULATION_OF_TRANSMEMBRANE_RECEPTOR_PROTEIN_SERINE_THREONINE_KINASE_SIGNALING_PATHWAY	GOBP_REGULATION_OF_TRANSMEMBRANE_RECEPTOR_PROTEIN_SERINE_THREONINE_KINASE_SIGNALING_PATHWAY		244	0.0850642	1.50735	0.0695825	0.189532	1	8485	tags=68%, list=60%, signal=166%
GOBP_PROTEIN_REFOLDING	GOBP_PROTEIN_REFOLDING		23	0.258885	1.50711	0.0677291	0.189534	1	3743	tags=52%, list=26%, signal=71%
GOBP_REGULATION_OF_VASOCONSTRICTION	GOBP_REGULATION_OF_VASOCONSTRICTION		81	0.142051	1.50708	0.0650888	0.189339	1	3433	tags=38%, list=24%, signal=50%
GOBP_REGULATION_OF_HYDROLASE_ACTIVITY	GOBP_REGULATION_OF_HYDROLASE_ACTIVITY		341	0.0705505	1.50657	0.0843373	0.189536	1	6026	tags=49%, list=42%, signal=83%
GOBP_DEVELOPMENT_OF_PRIMARY_FEMALE_SEXUAL_CHARACTERISTICS	GOBP_DEVELOPMENT_OF_PRIMARY_FEMALE_SEXUAL_CHARACTERISTICS		116	0.120688	1.50538	0.0553435	0.190343	1	5162	tags=48%, list=36%, signal=75%
GOBP_PROTEIN_MODIFICATION_BY_SMALL_PROTEIN_REMOVAL	GOBP_PROTEIN_MODIFICATION_BY_SMALL_PROTEIN_REMOVAL		101	0.129475	1.50433	0.0795229	0.191016	1	11547	tags=94%, list=81%, signal=497%
GOBP_MITOTIC_CELL_CYCLE_PHASE_TRANSITION	GOBP_MITOTIC_CELL_CYCLE_PHASE_TRANSITION		400	0.065906	1.50397	0.0804829	0.191093	1	8154	tags=64%, list=57%, signal=145%
GOBP_REGULATION_OF_INTRACELLULAR_STEROID_HORMONE_RECEPTOR_SIGNALING_PATHWAY	GOBP_REGULATION_OF_INTRACELLULAR_STEROID_HORMONE_RECEPTOR_SIGNALING_PATHWAY		69	0.154273	1.50351	0.0812274	0.191254	1	8533	tags=75%, list=60%, signal=188%
GOBP_RESCUE_OF_STALLED_RIBOSOME	GOBP_RESCUE_OF_STALLED_RIBOSOME		25	0.253311	1.50252	0.077551	0.191929	1	10624	tags=100%, list=75%, signal=395%
GOBP_CARDIOBLAST_DIFFERENTIATION	GOBP_CARDIOBLAST_DIFFERENTIATION		16	0.305522	1.49943	0.0707457	0.194448	1	5436	tags=69%, list=38%, signal=111%
GOBP_PLASMA_MEMBRANE_PHOSPHOLIPID_SCRAMBLING	GOBP_PLASMA_MEMBRANE_PHOSPHOLIPID_SCRAMBLING		24	0.25589	1.49935	0.0670732	0.19431	1	1699	tags=38%, list=12%, signal=43%
GOBP_MONOAMINE_TRANSPORT	GOBP_MONOAMINE_TRANSPORT		80	0.147044	1.49892	0.0518962	0.194462	1	2897	tags=35%, list=20%, signal=44%
GOBP_POSITIVE_REGULATION_OF_DNA_TEMPLATED_TRANSCRIPTION_ELONGATION	GOBP_POSITIVE_REGULATION_OF_DNA_TEMPLATED_TRANSCRIPTION_ELONGATION		54	0.173004	1.49884	0.0623782	0.19432	1	10979	tags=94%, list=77%, signal=413%
GOBP_GLIAL_CELL_DEVELOPMENT	GOBP_GLIAL_CELL_DEVELOPMENT		134	0.11243	1.49811	0.0732177	0.194722	1	8285	tags=69%, list=58%, signal=165%
GOBP_G0_TO_G1_TRANSITION	GOBP_G0_TO_G1_TRANSITION		37	0.204854	1.49807	0.0745968	0.194539	1	10930	tags=97%, list=77%, signal=419%
GOBP_OSTEOBLAST_PROLIFERATION	GOBP_OSTEOBLAST_PROLIFERATION		34	0.213489	1.49742	0.0672269	0.194872	1	4499	tags=53%, list=32%, signal=77%
GOBP_RESPONSE_TO_MISFOLDED_PROTEIN	GOBP_RESPONSE_TO_MISFOLDED_PROTEIN		19	0.284926	1.49692	0.0534979	0.195091	1	9425	tags=95%, list=66%, signal=281%
GOBP_NEURONAL_ACTION_POTENTIAL	GOBP_NEURONAL_ACTION_POTENTIAL		48	0.181514	1.49648	0.071048	0.195255	1	2463	tags=35%, list=17%, signal=43%
GOBP_NEGATIVE_REGULATION_OF_INFLAMMASOME_MEDIATED_SIGNALING_PATHWAY	GOBP_NEGATIVE_REGULATION_OF_INFLAMMASOME_MEDIATED_SIGNALING_PATHWAY		18	0.28724	1.49377	0.0570265	0.197399	1	5400	tags=67%, list=38%, signal=107%
GOBP_MATERNAL_PLACENTA_DEVELOPMENT	GOBP_MATERNAL_PLACENTA_DEVELOPMENT		43	0.189927	1.4936	0.0859375	0.197322	1	8220	tags=77%, list=58%, signal=181%
GOBP_INTRA_GOLGI_VESICLE_MEDIATED_TRANSPORT	GOBP_INTRA_GOLGI_VESICLE_MEDIATED_TRANSPORT		28	0.236314	1.49162	0.0788462	0.198788	1	10866	tags=100%, list=76%, signal=423%
GOBP_XENOPHAGY	GOBP_XENOPHAGY		15	0.317457	1.49141	0.0593047	0.198753	1	6866	tags=80%, list=48%, signal=155%
GOBP_REGULATION_OF_DNA_TEMPLATED_TRANSCRIPTION_ELONGATION	GOBP_REGULATION_OF_DNA_TEMPLATED_TRANSCRIPTION_ELONGATION		71	0.150973	1.49115	0.0724638	0.198778	1	8879	tags=77%, list=62%, signal=205%
GOBP_ANATOMICAL_STRUCTURE_MATURATION	GOBP_ANATOMICAL_STRUCTURE_MATURATION		256	0.0802839	1.49114	0.0682731	0.198569	1	3433	tags=32%, list=24%, signal=41%
GOBP_POSITIVE_REGULATION_OF_INSULIN_SECRETION	GOBP_POSITIVE_REGULATION_OF_INSULIN_SECRETION		106	0.121398	1.49097	0.0629921	0.198502	1	1237	tags=21%, list=9%, signal=23%
GOBP_RETINA_MORPHOGENESIS_IN_CAMERA_TYPE_EYE	GOBP_RETINA_MORPHOGENESIS_IN_CAMERA_TYPE_EYE		66	0.15451	1.49042	0.0686869	0.198727	1	4276	tags=45%, list=30%, signal=65%
GOBP_CORONARY_VASCULATURE_DEVELOPMENT	GOBP_CORONARY_VASCULATURE_DEVELOPMENT		70	0.153196	1.4897	0.0833333	0.199157	1	4129	tags=44%, list=29%, signal=62%
GOBP_REGULATION_OF_MITOTIC_CELL_CYCLE	GOBP_REGULATION_OF_MITOTIC_CELL_CYCLE		455	0.0618986	1.48965	0.077821	0.198977	1	12399	tags=93%, list=87%, signal=704%
GOBP_POST_TRANSLATIONAL_PROTEIN_TARGETING_TO_ENDOPLASMIC_RETICULUM_MEMBRANE	GOBP_POST_TRANSLATIONAL_PROTEIN_TARGETING_TO_ENDOPLASMIC_RETICULUM_MEMBRANE		16	0.304439	1.48963	0.0679406	0.198783	1	7229	tags=81%, list=51%, signal=165%
GOBP_NEGATIVE_REGULATION_OF_SPROUTING_ANGIOGENESIS	GOBP_NEGATIVE_REGULATION_OF_SPROUTING_ANGIOGENESIS		15	0.317392	1.48954	0.0728347	0.198664	1	7815	tags=87%, list=55%, signal=192%
GOBP_MEMBRANE_DEPOLARIZATION	GOBP_MEMBRANE_DEPOLARIZATION		88	0.139988	1.48871	0.0714286	0.199196	1	1899	tags=27%, list=13%, signal=31%
GOBP_REGULATION_OF_AXON_EXTENSION_INVOLVED_IN_AXON_GUIDANCE	GOBP_REGULATION_OF_AXON_EXTENSION_INVOLVED_IN_AXON_GUIDANCE		17	0.300996	1.48854	0.0695825	0.199116	1	5762	tags=71%, list=41%, signal=119%
GOBP_CERAMIDE_CATABOLIC_PROCESS	GOBP_CERAMIDE_CATABOLIC_PROCESS		19	0.286383	1.48766	0.0886598	0.199687	1	4165	tags=58%, list=29%, signal=82%
GOBP_REGULATION_OF_GLIAL_CELL_APOPTOTIC_PROCESS	GOBP_REGULATION_OF_GLIAL_CELL_APOPTOTIC_PROCESS		15	0.321404	1.48714	0.0722892	0.199945	1	7758	tags=87%, list=55%, signal=190%
GOBP_NOREPINEPHRINE_TRANSPORT	GOBP_NOREPINEPHRINE_TRANSPORT		26	0.243704	1.48681	0.0717213	0.199989	1	5291	tags=62%, list=37%, signal=98%
GOBP_EMBRYONIC_PLACENTA_DEVELOPMENT	GOBP_EMBRYONIC_PLACENTA_DEVELOPMENT		104	0.124763	1.48585	0.0730689	0.200604	1	4938	tags=47%, list=35%, signal=72%
GOBP_SYNAPTIC_TRANSMISSION_GLUTAMATERGIC	GOBP_SYNAPTIC_TRANSMISSION_GLUTAMATERGIC		92	0.13294	1.48522	0.0700389	0.200952	1	3840	tags=40%, list=27%, signal=55%
GOBP_PEPTIDYL_LYSINE_MODIFICATION	GOBP_PEPTIDYL_LYSINE_MODIFICATION		113	0.120617	1.48448	0.0784314	0.201376	1	8617	tags=73%, list=61%, signal=183%
GOBP_REGULATION_OF_AUTOPHAGOSOME_ASSEMBLY	GOBP_REGULATION_OF_AUTOPHAGOSOME_ASSEMBLY		44	0.193721	1.48337	0.0790021	0.202098	1	10504	tags=93%, list=74%, signal=355%
GOBP_TYPE_B_PANCREATIC_CELL_DIFFERENTIATION	GOBP_TYPE_B_PANCREATIC_CELL_DIFFERENTIATION		29	0.225863	1.48321	0.0666667	0.202009	1	5130	tags=59%, list=36%, signal=92%
GOBP_FEMALE_SEX_DIFFERENTIATION	GOBP_FEMALE_SEX_DIFFERENTIATION		129	0.111012	1.48288	0.0843373	0.202125	1	5490	tags=50%, list=39%, signal=80%
GOBP_POSITIVE_REGULATION_OF_AMYLOID_PRECURSOR_PROTEIN_CATABOLIC_PROCESS	GOBP_POSITIVE_REGULATION_OF_AMYLOID_PRECURSOR_PROTEIN_CATABOLIC_PROCESS		24	0.251529	1.48229	0.0796117	0.202445	1	2946	tags=46%, list=21%, signal=58%
GOBP_SYNAPTIC_VESICLE_ENDOSOMAL_PROCESSING	GOBP_SYNAPTIC_VESICLE_ENDOSOMAL_PROCESSING		15	0.317181	1.48193	0.0684932	0.202511	1	7818	tags=87%, list=55%, signal=192%
GOBP_COMPLEMENT_ACTIVATION	GOBP_COMPLEMENT_ACTIVATION		47	0.179818	1.48166	0.089613	0.202528	1	476	tags=21%, list=3%, signal=22%
GOBP_EMBRYONIC_AXIS_SPECIFICATION	GOBP_EMBRYONIC_AXIS_SPECIFICATION		37	0.205643	1.48103	0.0667939	0.202901	1	7844	tags=76%, list=55%, signal=168%
GOBP_REGULATION_OF_MITOTIC_SPINDLE_ASSEMBLY	GOBP_REGULATION_OF_MITOTIC_SPINDLE_ASSEMBLY		20	0.280864	1.4809	0.0833333	0.202812	1	3832	tags=55%, list=27%, signal=75%
GOBP_PROTEIN_LOCALIZATION_TO_GOLGI_APPARATUS	GOBP_PROTEIN_LOCALIZATION_TO_GOLGI_APPARATUS		30	0.226186	1.47821	0.0909091	0.205029	1	8166	tags=80%, list=57%, signal=187%
GOBP_REGULATION_OF_EPIDERMIS_DEVELOPMENT	GOBP_REGULATION_OF_EPIDERMIS_DEVELOPMENT		60	0.161403	1.47779	0.0645161	0.205183	1	6720	tags=63%, list=47%, signal=120%
GOBP_REGULATION_OF_MICROTUBULE_DEPOLYMERIZATION	GOBP_REGULATION_OF_MICROTUBULE_DEPOLYMERIZATION		32	0.22593	1.47699	0.075	0.205703	1	5237	tags=59%, list=37%, signal=94%
GOBP_POSITIVE_REGULATION_OF_SYNAPTIC_TRANSMISSION_GLUTAMATERGIC	GOBP_POSITIVE_REGULATION_OF_SYNAPTIC_TRANSMISSION_GLUTAMATERGIC		30	0.226244	1.47686	0.0833333	0.205608	1	5795	tags=63%, list=41%, signal=107%
GOBP_FORMATION_OF_PRIMARY_GERM_LAYER	GOBP_FORMATION_OF_PRIMARY_GERM_LAYER		116	0.117626	1.47642	0.0825147	0.205786	1	4960	tags=47%, list=35%, signal=71%
GOBP_REGULATION_OF_CELL_SUBSTRATE_JUNCTION_ORGANIZATION	GOBP_REGULATION_OF_CELL_SUBSTRATE_JUNCTION_ORGANIZATION		66	0.15195	1.47608	0.081761	0.20587	1	6036	tags=58%, list=42%, signal=100%
GOBP_NEGATIVE_REGULATION_OF_EPIDERMIS_DEVELOPMENT	GOBP_NEGATIVE_REGULATION_OF_EPIDERMIS_DEVELOPMENT		16	0.309363	1.47583	0.0781563	0.205855	1	2715	tags=50%, list=19%, signal=62%
GOBP_PROTEIN_LOCALIZATION_TO_CELL_SURFACE	GOBP_PROTEIN_LOCALIZATION_TO_CELL_SURFACE		70	0.147505	1.47513	0.0778443	0.206229	1	4819	tags=49%, list=34%, signal=73%
GOBP_LONG_TERM_SYNAPTIC_POTENTIATION	GOBP_LONG_TERM_SYNAPTIC_POTENTIATION		99	0.127971	1.47477	0.0865385	0.206349	1	6236	tags=57%, list=44%, signal=100%
GOBP_RESPONSE_TO_RADIATION	GOBP_RESPONSE_TO_RADIATION		391	0.0667449	1.47332	0.0864198	0.20748	1	8205	tags=64%, list=58%, signal=148%
GOBP_APPENDAGE_DEVELOPMENT	GOBP_APPENDAGE_DEVELOPMENT		187	0.0945626	1.47188	0.0729167	0.208616	1	5136	tags=45%, list=36%, signal=70%
GOBP_SENSORY_PERCEPTION_OF_LIGHT_STIMULUS	GOBP_SENSORY_PERCEPTION_OF_LIGHT_STIMULUS		112	0.118292	1.47172	0.0892857	0.208532	1	3155	tags=34%, list=22%, signal=43%
GOBP_RESPONSE_TO_PH	GOBP_RESPONSE_TO_PH		39	0.1972	1.47079	0.0798319	0.209145	1	1578	tags=31%, list=11%, signal=35%
GOBP_PROTEIN_LOCALIZATION_TO_PHAGOPHORE_ASSEMBLY_SITE	GOBP_PROTEIN_LOCALIZATION_TO_PHAGOPHORE_ASSEMBLY_SITE		15	0.317185	1.47064	0.0764463	0.209037	1	8766	tags=93%, list=62%, signal=243%
GOBP_POSITIVE_REGULATION_OF_INFLAMMATORY_RESPONSE	GOBP_POSITIVE_REGULATION_OF_INFLAMMATORY_RESPONSE		142	0.108424	1.46936	0.0875764	0.209911	1	2879	tags=31%, list=20%, signal=38%
GOBP_SYMPATHETIC_NERVOUS_SYSTEM_DEVELOPMENT	GOBP_SYMPATHETIC_NERVOUS_SYSTEM_DEVELOPMENT		22	0.262771	1.46899	0.0767717	0.210029	1	2732	tags=45%, list=19%, signal=56%
GOBP_ANTIVIRAL_INNATE_IMMUNE_RESPONSE	GOBP_ANTIVIRAL_INNATE_IMMUNE_RESPONSE		59	0.161864	1.46851	0.080786	0.210253	1	7107	tags=66%, list=50%, signal=132%
GOBP_REGULATION_OF_SPINDLE_ORGANIZATION	GOBP_REGULATION_OF_SPINDLE_ORGANIZATION		40	0.198054	1.46839	0.0867052	0.21014	1	5723	tags=60%, list=40%, signal=100%
GOBP_POSITIVE_REGULATION_OF_CIRCADIAN_RHYTHM	GOBP_POSITIVE_REGULATION_OF_CIRCADIAN_RHYTHM		19	0.285464	1.46827	0.094518	0.21004	1	5675	tags=68%, list=40%, signal=114%
GOBP_REGULATION_OF_SYNAPTIC_TRANSMISSION_GLUTAMATERGIC	GOBP_REGULATION_OF_SYNAPTIC_TRANSMISSION_GLUTAMATERGIC		58	0.161778	1.46796	0.0786026	0.210087	1	5799	tags=57%, list=41%, signal=96%
GOBP_NEGATIVE_REGULATION_OF_SYNAPSE_ORGANIZATION	GOBP_NEGATIVE_REGULATION_OF_SYNAPSE_ORGANIZATION		17	0.300996	1.46751	0.0877944	0.210281	1	5762	tags=71%, list=41%, signal=119%
GOBP_REGULATION_OF_UBIQUITIN_DEPENDENT_PROTEIN_CATABOLIC_PROCESS	GOBP_REGULATION_OF_UBIQUITIN_DEPENDENT_PROTEIN_CATABOLIC_PROCESS		156	0.101872	1.46744	0.084507	0.210115	1	8138	tags=67%, list=57%, signal=156%
GOBP_REGULATION_OF_PROTEIN_MATURATION	GOBP_REGULATION_OF_PROTEIN_MATURATION		61	0.160352	1.46715	0.0718447	0.210145	1	5888	tags=57%, list=41%, signal=97%
GOBP_ANTERIOR_POSTERIOR_AXIS_SPECIFICATION	GOBP_ANTERIOR_POSTERIOR_AXIS_SPECIFICATION		48	0.178119	1.4668	0.0892495	0.210256	1	7844	tags=73%, list=55%, signal=162%
GOBP_RESPONSE_TO_MONOAMINE	GOBP_RESPONSE_TO_MONOAMINE		44	0.183431	1.46547	0.0740741	0.211258	1	4509	tags=50%, list=32%, signal=73%
GOBP_POSITIVE_REGULATION_OF_INTRACELLULAR_PROTEIN_TRANSPORT	GOBP_POSITIVE_REGULATION_OF_INTRACELLULAR_PROTEIN_TRANSPORT		100	0.123918	1.46501	0.0724638	0.211455	1	10337	tags=85%, list=73%, signal=309%
GOBP_COLLAGEN_FIBRIL_ORGANIZATION	GOBP_COLLAGEN_FIBRIL_ORGANIZATION		58	0.163091	1.46482	0.0869565	0.211398	1	10439	tags=90%, list=73%, signal=336%
GOBP_REGULATION_OF_BMP_SIGNALING_PATHWAY	GOBP_REGULATION_OF_BMP_SIGNALING_PATHWAY		92	0.125859	1.4642	0.0669291	0.211739	1	6877	tags=61%, list=48%, signal=117%
GOBP_REGULATION_OF_INCLUSION_BODY_ASSEMBLY	GOBP_REGULATION_OF_INCLUSION_BODY_ASSEMBLY		17	0.300114	1.46406	0.0972516	0.211652	1	4938	tags=65%, list=35%, signal=99%
GOBP_POSITIVE_REGULATION_OF_PEPTIDE_SECRETION	GOBP_POSITIVE_REGULATION_OF_PEPTIDE_SECRETION		134	0.107993	1.4631	0.0910853	0.212292	1	1237	tags=19%, list=9%, signal=21%
GOBP_NEURON_APOPTOTIC_PROCESS	GOBP_NEURON_APOPTOTIC_PROCESS		341	0.0681284	1.46298	0.0921844	0.21216	1	10230	tags=79%, list=72%, signal=273%
GOBP_SPINAL_CORD_MOTOR_NEURON_DIFFERENTIATION	GOBP_SPINAL_CORD_MOTOR_NEURON_DIFFERENTIATION		31	0.219864	1.46294	0.0924025	0.211985	1	4219	tags=52%, list=30%, signal=73%
GOBP_SPHINGOID_METABOLIC_PROCESS	GOBP_SPHINGOID_METABOLIC_PROCESS		17	0.295642	1.46193	0.0928433	0.212648	1	4165	tags=59%, list=29%, signal=83%
GOBP_POSITIVE_REGULATION_OF_TORC1_SIGNALING	GOBP_POSITIVE_REGULATION_OF_TORC1_SIGNALING		49	0.179156	1.46105	0.0878243	0.213249	1	11681	tags=100%, list=82%, signal=558%
GOBP_REGULATION_OF_RECEPTOR_SIGNALING_PATHWAY_VIA_STAT	GOBP_REGULATION_OF_RECEPTOR_SIGNALING_PATHWAY_VIA_STAT		85	0.13561	1.46101	0.0947581	0.213077	1	6280	tags=58%, list=44%, signal=103%
GOBP_DEVELOPMENTAL_GROWTH_INVOLVED_IN_MORPHOGENESIS	GOBP_DEVELOPMENTAL_GROWTH_INVOLVED_IN_MORPHOGENESIS		256	0.0799071	1.46094	0.0953307	0.212927	1	2605	tags=26%, list=18%, signal=31%
GOBP_GLUTAMATERGIC_NEURON_DIFFERENTIATION	GOBP_GLUTAMATERGIC_NEURON_DIFFERENTIATION		20	0.272755	1.46085	0.0769231	0.212796	1	1814	tags=40%, list=13%, signal=46%
GOBP_REGULATION_OF_EXOSOMAL_SECRETION	GOBP_REGULATION_OF_EXOSOMAL_SECRETION		16	0.309381	1.46082	0.0792683	0.212607	1	6270	tags=75%, list=44%, signal=134%
GOBP_ESTABLISHMENT_OF_MITOTIC_SPINDLE_LOCALIZATION	GOBP_ESTABLISHMENT_OF_MITOTIC_SPINDLE_LOCALIZATION		37	0.198987	1.46047	0.0903491	0.21271	1	6401	tags=65%, list=45%, signal=118%
GOBP_TYPE_B_PANCREATIC_CELL_PROLIFERATION	GOBP_TYPE_B_PANCREATIC_CELL_PROLIFERATION		37	0.204835	1.46009	0.0981595	0.212849	1	5165	tags=57%, list=36%, signal=89%
GOBP_CELL_MATRIX_ADHESION	GOBP_CELL_MATRIX_ADHESION		218	0.0859792	1.45855	0.0785124	0.214082	1	6036	tags=51%, list=42%, signal=87%
GOBP_RENAL_TUBULE_DEVELOPMENT	GOBP_RENAL_TUBULE_DEVELOPMENT		112	0.118909	1.45821	0.102459	0.214168	1	4543	tags=44%, list=32%, signal=64%
GOBP_POSITIVE_REGULATION_OF_PROTEIN_BINDING	GOBP_POSITIVE_REGULATION_OF_PROTEIN_BINDING		62	0.155474	1.45813	0.0628571	0.214034	1	6055	tags=58%, list=43%, signal=101%
GOBP_REGULATION_OF_STEROID_HORMONE_BIOSYNTHETIC_PROCESS	GOBP_REGULATION_OF_STEROID_HORMONE_BIOSYNTHETIC_PROCESS		20	0.272206	1.45785	0.0804829	0.214028	1	4666	tags=60%, list=33%, signal=89%
GOBP_CELLULAR_EXTRAVASATION	GOBP_CELLULAR_EXTRAVASATION		69	0.150857	1.45765	0.0907336	0.214001	1	1780	tags=28%, list=13%, signal=31%
GOBP_TRANSLESION_SYNTHESIS	GOBP_TRANSLESION_SYNTHESIS		18	0.28902	1.45759	0.0860421	0.213817	1	9325	tags=94%, list=66%, signal=274%
GOBP_REGULATORY_NCRNA_PROCESSING	GOBP_REGULATORY_NCRNA_PROCESSING		51	0.170006	1.45711	0.0983936	0.214019	1	6513	tags=63%, list=46%, signal=115%
GOBP_REGULATION_OF_EXTRINSIC_APOPTOTIC_SIGNALING_PATHWAY	GOBP_REGULATION_OF_EXTRINSIC_APOPTOTIC_SIGNALING_PATHWAY		162	0.0983663	1.45664	0.0858283	0.214255	1	5551	tags=49%, list=39%, signal=79%
GOBP_POSITIVE_REGULATION_OF_SMOOTHENED_SIGNALING_PATHWAY	GOBP_POSITIVE_REGULATION_OF_SMOOTHENED_SIGNALING_PATHWAY		40	0.194212	1.45611	0.0858896	0.21455	1	6133	tags=63%, list=43%, signal=110%
GOBP_REGULATION_OF_ANIMAL_ORGAN_MORPHOGENESIS	GOBP_REGULATION_OF_ANIMAL_ORGAN_MORPHOGENESIS		90	0.133015	1.45538	0.0703125	0.215039	1	7126	tags=63%, list=50%, signal=126%
GOBP_REGULATION_OF_AUTOPHAGOSOME_MATURATION	GOBP_REGULATION_OF_AUTOPHAGOSOME_MATURATION		16	0.300176	1.45513	0.0808081	0.215047	1	9956	tags=100%, list=70%, signal=333%
GOBP_REGULATION_OF_EXTRACELLULAR_MATRIX_ORGANIZATION	GOBP_REGULATION_OF_EXTRACELLULAR_MATRIX_ORGANIZATION		60	0.156521	1.45493	0.0757282	0.215059	1	4893	tags=50%, list=34%, signal=76%
GOBP_REGULATION_OF_EXTENT_OF_CELL_GROWTH	GOBP_REGULATION_OF_EXTENT_OF_CELL_GROWTH		108	0.121156	1.45481	0.0917782	0.214927	1	6058	tags=55%, list=43%, signal=94%
GOBP_POSITIVE_REGULATION_OF_SIGNAL_TRANSDUCTION_BY_P53_CLASS_MEDIATOR	GOBP_POSITIVE_REGULATION_OF_SIGNAL_TRANSDUCTION_BY_P53_CLASS_MEDIATOR		35	0.211033	1.45443	0.0997963	0.215036	1	3100	tags=43%, list=22%, signal=55%
GOBP_RESPONSE_TO_PEPTIDE_HORMONE	GOBP_RESPONSE_TO_PEPTIDE_HORMONE		496	0.056789	1.45386	0.0900383	0.215278	1	5900	tags=47%, list=41%, signal=77%
GOBP_REGULATION_OF_HORMONE_METABOLIC_PROCESS	GOBP_REGULATION_OF_HORMONE_METABOLIC_PROCESS		50	0.171111	1.45307	0.0761099	0.215777	1	3547	tags=42%, list=25%, signal=56%
GOBP_MITOCHONDRIAL_RNA_METABOLIC_PROCESS	GOBP_MITOCHONDRIAL_RNA_METABOLIC_PROCESS		42	0.186616	1.45281	0.10084	0.215817	1	9881	tags=88%, list=69%, signal=288%
GOBP_POSITIVE_REGULATION_OF_PROTEIN_CONTAINING_COMPLEX_ASSEMBLY	GOBP_POSITIVE_REGULATION_OF_PROTEIN_CONTAINING_COMPLEX_ASSEMBLY		188	0.0904229	1.4501	0.085389	0.218127	1	3420	tags=33%, list=24%, signal=43%
GOBP_REGULATION_OF_PLATELET_ACTIVATION	GOBP_REGULATION_OF_PLATELET_ACTIVATION		47	0.181342	1.44968	0.0781563	0.218281	1	2875	tags=38%, list=20%, signal=48%
GOBP_IRE1_MEDIATED_UNFOLDED_PROTEIN_RESPONSE	GOBP_IRE1_MEDIATED_UNFOLDED_PROTEIN_RESPONSE		15	0.304285	1.44952	0.0964083	0.218205	1	5157	tags=67%, list=36%, signal=104%
GOBP_REGULATION_OF_SPROUTING_ANGIOGENESIS	GOBP_REGULATION_OF_SPROUTING_ANGIOGENESIS		44	0.186607	1.44877	0.106855	0.218663	1	6080	tags=61%, list=43%, signal=107%
GOBP_GLYCEROPHOSPHOLIPID_CATABOLIC_PROCESS	GOBP_GLYCEROPHOSPHOLIPID_CATABOLIC_PROCESS		32	0.219193	1.4487	0.0914397	0.218494	1	5777	tags=63%, list=41%, signal=105%
GOBP_MEMBRANE_DEPOLARIZATION_DURING_ACTION_POTENTIAL	GOBP_MEMBRANE_DEPOLARIZATION_DURING_ACTION_POTENTIAL		27	0.233714	1.44819	0.106557	0.218693	1	1422	tags=33%, list=10%, signal=37%
GOBP_RESPONSE_TO_LEUKEMIA_INHIBITORY_FACTOR	GOBP_RESPONSE_TO_LEUKEMIA_INHIBITORY_FACTOR		121	0.114403	1.44805	0.104331	0.218619	1	6848	tags=60%, list=48%, signal=114%
GOBP_PROTEIN_K48_LINKED_DEUBIQUITINATION	GOBP_PROTEIN_K48_LINKED_DEUBIQUITINATION		24	0.240787	1.44623	0.0967742	0.220147	1	10209	tags=96%, list=72%, signal=339%
GOBP_T_CELL_MEDIATED_CYTOTOXICITY	GOBP_T_CELL_MEDIATED_CYTOTOXICITY		55	0.164863	1.44536	0.0808679	0.220784	1	1542	tags=27%, list=11%, signal=30%
GOBP_DNA_TEMPLATED_DNA_REPLICATION_MAINTENANCE_OF_FIDELITY	GOBP_DNA_TEMPLATED_DNA_REPLICATION_MAINTENANCE_OF_FIDELITY		51	0.172268	1.44533	0.0631579	0.220591	1	8154	tags=75%, list=57%, signal=174%
GOBP_NEGATIVE_REGULATION_OF_PROGRAMMED_NECROTIC_CELL_DEATH	GOBP_NEGATIVE_REGULATION_OF_PROGRAMMED_NECROTIC_CELL_DEATH		17	0.296818	1.44463	0.102	0.220975	1	10004	tags=100%, list=70%, signal=337%
GOBP_POSITIVE_REGULATION_OF_RESPONSE_TO_ENDOPLASMIC_RETICULUM_STRESS	GOBP_POSITIVE_REGULATION_OF_RESPONSE_TO_ENDOPLASMIC_RETICULUM_STRESS		36	0.197223	1.44227	0.0981211	0.22303	1	5892	tags=61%, list=41%, signal=104%
GOBP_BIOLOGICAL_PROCESS_INVOLVED_IN_INTRASPECIES_INTERACTION_BETWEEN_ORGANISMS	GOBP_BIOLOGICAL_PROCESS_INVOLVED_IN_INTRASPECIES_INTERACTION_BETWEEN_ORGANISMS		63	0.156561	1.44217	0.083499	0.222877	1	8166	tags=73%, list=57%, signal=171%
GOBP_EMBRYONIC_APPENDAGE_MORPHOGENESIS	GOBP_EMBRYONIC_APPENDAGE_MORPHOGENESIS		123	0.111804	1.44203	0.0867769	0.222795	1	5013	tags=46%, list=35%, signal=71%
GOBP_HEPARAN_SULFATE_PROTEOGLYCAN_METABOLIC_PROCESS	GOBP_HEPARAN_SULFATE_PROTEOGLYCAN_METABOLIC_PROCESS		41	0.195953	1.44147	0.102	0.223102	1	7626	tags=73%, list=54%, signal=157%
GOBP_REGULATION_OF_ERAD_PATHWAY	GOBP_REGULATION_OF_ERAD_PATHWAY		27	0.232879	1.44083	0.0985916	0.223484	1	8281	tags=81%, list=58%, signal=195%
GOBP_NEGATIVE_REGULATION_OF_TELOMERE_MAINTENANCE	GOBP_NEGATIVE_REGULATION_OF_TELOMERE_MAINTENANCE		32	0.212559	1.43992	0.105691	0.224184	1	11204	tags=100%, list=79%, signal=470%
GOBP_POSITIVE_REGULATION_OF_GLIAL_CELL_DIFFERENTIATION	GOBP_POSITIVE_REGULATION_OF_GLIAL_CELL_DIFFERENTIATION		47	0.178783	1.43985	0.0899796	0.224015	1	3819	tags=45%, list=27%, signal=61%
GOBP_POSITIVE_REGULATION_OF_TOR_SIGNALING	GOBP_POSITIVE_REGULATION_OF_TOR_SIGNALING		69	0.147456	1.43981	0.0893617	0.223837	1	11721	tags=97%, list=82%, signal=550%
GOBP_NEGATIVE_REGULATION_OF_INSULIN_SECRETION	GOBP_NEGATIVE_REGULATION_OF_INSULIN_SECRETION		56	0.162047	1.43921	0.0784314	0.224145	1	5322	tags=54%, list=37%, signal=85%
GOBP_NEGATIVE_REGULATION_OF_RESPONSE_TO_ENDOPLASMIC_RETICULUM_STRESS	GOBP_NEGATIVE_REGULATION_OF_RESPONSE_TO_ENDOPLASMIC_RETICULUM_STRESS		43	0.187385	1.43912	0.102249	0.224013	1	5941	tags=60%, list=42%, signal=104%
GOBP_INTRINSIC_APOPTOTIC_SIGNALING_PATHWAY_IN_RESPONSE_TO_ENDOPLASMIC_RETICULUM_STRESS	GOBP_INTRINSIC_APOPTOTIC_SIGNALING_PATHWAY_IN_RESPONSE_TO_ENDOPLASMIC_RETICULUM_STRESS		63	0.154964	1.43897	0.116505	0.223939	1	3674	tags=41%, list=26%, signal=55%
GOBP_REGULATION_OF_PROTEIN_LOCALIZATION_TO_NUCLEUS	GOBP_REGULATION_OF_PROTEIN_LOCALIZATION_TO_NUCLEUS		150	0.101774	1.43893	0.103922	0.223749	1	10797	tags=86%, list=76%, signal=353%
GOBP_REGULATION_OF_CELL_GROWTH	GOBP_REGULATION_OF_CELL_GROWTH		389	0.0634606	1.43891	0.0818363	0.223541	1	8151	tags=63%, list=57%, signal=145%
GOBP_NEGATIVE_REGULATION_OF_AMYLOID_PRECURSOR_PROTEIN_CATABOLIC_PROCESS	GOBP_NEGATIVE_REGULATION_OF_AMYLOID_PRECURSOR_PROTEIN_CATABOLIC_PROCESS		19	0.276421	1.43823	0.0891473	0.22393	1	3558	tags=53%, list=25%, signal=70%
GOBP_CELL_CELL_JUNCTION_MAINTENANCE	GOBP_CELL_CELL_JUNCTION_MAINTENANCE		19	0.274101	1.43812	0.114786	0.223836	1	2094	tags=42%, list=15%, signal=49%
GOBP_RESPONSE_TO_INTERLEUKIN_6	GOBP_RESPONSE_TO_INTERLEUKIN_6		35	0.204717	1.43802	0.088983	0.223685	1	8878	tags=83%, list=62%, signal=220%
GOBP_NUCLEAR_EXPORT	GOBP_NUCLEAR_EXPORT		149	0.102428	1.43774	0.0896686	0.223735	1	10488	tags=84%, list=74%, signal=316%
GOBP_LYMPH_VESSEL_DEVELOPMENT	GOBP_LYMPH_VESSEL_DEVELOPMENT		32	0.216149	1.43759	0.104208	0.223664	1	6709	tags=69%, list=47%, signal=130%
GOBP_CELL_GROWTH	GOBP_CELL_GROWTH		477	0.0576269	1.43696	0.0756646	0.224006	1	8151	tags=63%, list=57%, signal=142%
GOBP_ENTRAINMENT_OF_CIRCADIAN_CLOCK	GOBP_ENTRAINMENT_OF_CIRCADIAN_CLOCK		22	0.253731	1.43662	0.0861723	0.224164	1	5446	tags=64%, list=38%, signal=103%
GOBP_REGULATION_OF_SHORT_TERM_NEURONAL_SYNAPTIC_PLASTICITY	GOBP_REGULATION_OF_SHORT_TERM_NEURONAL_SYNAPTIC_PLASTICITY		19	0.280509	1.43587	0.0849802	0.224646	1	2003	tags=42%, list=14%, signal=49%
GOBP_REGULATION_OF_PEROXISOME_PROLIFERATOR_ACTIVATED_RECEPTOR_SIGNALING_PATHWAY	GOBP_REGULATION_OF_PEROXISOME_PROLIFERATOR_ACTIVATED_RECEPTOR_SIGNALING_PATHWAY		18	0.2766	1.4336	0.110672	0.226614	1	3971	tags=56%, list=28%, signal=77%
GOBP_G_PROTEIN_COUPLED_DOPAMINE_RECEPTOR_SIGNALING_PATHWAY	GOBP_G_PROTEIN_COUPLED_DOPAMINE_RECEPTOR_SIGNALING_PATHWAY		27	0.231425	1.43293	0.0905433	0.227009	1	4088	tags=52%, list=29%, signal=73%
GOBP_NEGATIVE_REGULATION_OF_TRANSPORT	GOBP_NEGATIVE_REGULATION_OF_TRANSPORT		426	0.0608174	1.43268	0.0871287	0.227015	1	3433	tags=30%, list=24%, signal=38%
GOBP_SEX_DIFFERENTIATION	GOBP_SEX_DIFFERENTIATION		272	0.0745768	1.43094	0.0954274	0.228458	1	4919	tags=42%, list=35%, signal=63%
GOBP_VENTRICULAR_CARDIAC_MUSCLE_TISSUE_MORPHOGENESIS	GOBP_VENTRICULAR_CARDIAC_MUSCLE_TISSUE_MORPHOGENESIS		50	0.169778	1.42997	0.103922	0.229233	1	4988	tags=52%, list=35%, signal=80%
GOBP_REGULATION_OF_ODONTOGENESIS	GOBP_REGULATION_OF_ODONTOGENESIS		20	0.267126	1.42899	0.0956175	0.229993	1	2605	tags=45%, list=18%, signal=55%
GOBP_RENAL_TUBULE_MORPHOGENESIS	GOBP_RENAL_TUBULE_MORPHOGENESIS		88	0.13242	1.42881	0.0953307	0.229954	1	4430	tags=44%, list=31%, signal=64%
GOBP_POSITIVE_REGULATION_OF_ERAD_PATHWAY	GOBP_POSITIVE_REGULATION_OF_ERAD_PATHWAY		20	0.267999	1.42836	0.10395	0.230141	1	8281	tags=85%, list=58%, signal=203%
GOBP_PROTEIN_QUALITY_CONTROL_FOR_MISFOLDED_OR_INCOMPLETELY_SYNTHESIZED_PROTEINS	GOBP_PROTEIN_QUALITY_CONTROL_FOR_MISFOLDED_OR_INCOMPLETELY_SYNTHESIZED_PROTEINS		26	0.237275	1.42726	0.103586	0.230921	1	9211	tags=88%, list=65%, signal=251%
GOBP_MEMBRANE_LIPID_BIOSYNTHETIC_PROCESS	GOBP_MEMBRANE_LIPID_BIOSYNTHETIC_PROCESS		122	0.109554	1.42717	0.0857741	0.230778	1	9295	tags=76%, list=65%, signal=218%
GOBP_REGULATION_OF_ENDOPLASMIC_RETICULUM_UNFOLDED_PROTEIN_RESPONSE	GOBP_REGULATION_OF_ENDOPLASMIC_RETICULUM_UNFOLDED_PROTEIN_RESPONSE		28	0.225478	1.42714	0.100616	0.230587	1	10004	tags=93%, list=70%, signal=313%
GOBP_PROTEIN_N_LINKED_GLYCOSYLATION_VIA_ASPARAGINE	GOBP_PROTEIN_N_LINKED_GLYCOSYLATION_VIA_ASPARAGINE		34	0.209836	1.42671	0.0809129	0.230791	1	9570	tags=88%, list=67%, signal=269%
GOBP_INTRACELLULAR_LIPID_TRANSPORT	GOBP_INTRACELLULAR_LIPID_TRANSPORT		44	0.181289	1.42582	0.0892495	0.231462	1	7125	tags=68%, list=50%, signal=136%
GOBP_VASCULAR_ENDOTHELIAL_CELL_PROLIFERATION	GOBP_VASCULAR_ENDOTHELIAL_CELL_PROLIFERATION		30	0.220598	1.42481	0.110442	0.232185	1	3979	tags=50%, list=28%, signal=69%
GOBP_REGULATION_OF_GENE_SILENCING_BY_REGULATORY_NCRNA	GOBP_REGULATION_OF_GENE_SILENCING_BY_REGULATORY_NCRNA		26	0.230661	1.42422	0.100806	0.232536	1	7664	tags=77%, list=54%, signal=167%
GOBP_SIGNAL_TRANSDUCTION_INVOLVED_IN_REGULATION_OF_GENE_EXPRESSION	GOBP_SIGNAL_TRANSDUCTION_INVOLVED_IN_REGULATION_OF_GENE_EXPRESSION		24	0.243141	1.42418	0.0819672	0.232342	1	1880	tags=38%, list=13%, signal=43%
GOBP_HORMONE_BIOSYNTHETIC_PROCESS	GOBP_HORMONE_BIOSYNTHETIC_PROCESS		56	0.161861	1.42361	0.108787	0.232679	1	3547	tags=41%, list=25%, signal=55%
GOBP_REGULATION_OF_CYTOSOLIC_CALCIUM_ION_CONCENTRATION	GOBP_REGULATION_OF_CYTOSOLIC_CALCIUM_ION_CONCENTRATION		63	0.152164	1.42344	0.0879346	0.23265	1	2585	tags=33%, list=18%, signal=41%
GOBP_GLAND_MORPHOGENESIS	GOBP_GLAND_MORPHOGENESIS		151	0.0996997	1.42291	0.105832	0.232989	1	8485	tags=70%, list=60%, signal=171%
GOBP_NUCLEAR_MIGRATION	GOBP_NUCLEAR_MIGRATION		32	0.210282	1.4224	0.114	0.233249	1	3237	tags=44%, list=23%, signal=57%
GOBP_CELLULAR_RESPONSE_TO_RADIATION	GOBP_CELLULAR_RESPONSE_TO_RADIATION		153	0.098061	1.42218	0.0941176	0.233223	1	11911	tags=93%, list=84%, signal=569%
GOBP_REGULATION_OF_INTRACELLULAR_ESTROGEN_RECEPTOR_SIGNALING_PATHWAY	GOBP_REGULATION_OF_INTRACELLULAR_ESTROGEN_RECEPTOR_SIGNALING_PATHWAY		29	0.227953	1.42206	0.0969072	0.233145	1	8533	tags=83%, list=60%, signal=206%
GOBP_NEGATIVE_REGULATION_OF_PROTEOLYSIS	GOBP_NEGATIVE_REGULATION_OF_PROTEOLYSIS		144	0.100573	1.42147	0.074	0.233478	1	5990	tags=52%, list=42%, signal=89%
GOBP_NEGATIVE_REGULATION_OF_D_GLUCOSE_IMPORT	GOBP_NEGATIVE_REGULATION_OF_D_GLUCOSE_IMPORT		16	0.296269	1.42146	0.105566	0.233267	1	2901	tags=50%, list=20%, signal=63%
GOBP_GANGLIOSIDE_BIOSYNTHETIC_PROCESS	GOBP_GANGLIOSIDE_BIOSYNTHETIC_PROCESS		16	0.290329	1.42144	0.109405	0.233061	1	4763	tags=63%, list=33%, signal=94%
GOBP_INHIBITORY_SYNAPSE_ASSEMBLY	GOBP_INHIBITORY_SYNAPSE_ASSEMBLY		20	0.266918	1.42108	0.100196	0.23317	1	3319	tags=50%, list=23%, signal=65%
GOBP_LEARNING	GOBP_LEARNING		162	0.096009	1.42093	0.0892495	0.233072	1	1985	tags=23%, list=14%, signal=27%
GOBP_DECIDUALIZATION	GOBP_DECIDUALIZATION		33	0.210278	1.4208	0.0958333	0.232976	1	8220	tags=79%, list=58%, signal=186%
GOBP_POSITIVE_REGULATION_OF_INTRACELLULAR_TRANSPORT	GOBP_POSITIVE_REGULATION_OF_INTRACELLULAR_TRANSPORT		138	0.104582	1.42035	0.095723	0.233163	1	10377	tags=83%, list=73%, signal=305%
GOBP_REGULATION_OF_EPIDERMAL_GROWTH_FACTOR_ACTIVATED_RECEPTOR_ACTIVITY	GOBP_REGULATION_OF_EPIDERMAL_GROWTH_FACTOR_ACTIVATED_RECEPTOR_ACTIVITY		17	0.291591	1.42012	0.107724	0.233145	1	3386	tags=53%, list=24%, signal=69%
GOBP_REGULATION_OF_MRNA_PROCESSING	GOBP_REGULATION_OF_MRNA_PROCESSING		127	0.108384	1.42008	0.0996016	0.232965	1	10005	tags=81%, list=70%, signal=271%
GOBP_SIGNALING_RECEPTOR_LIGAND_PRECURSOR_PROCESSING	GOBP_SIGNALING_RECEPTOR_LIGAND_PRECURSOR_PROCESSING		37	0.197524	1.4199	0.109504	0.232923	1	4500	tags=51%, list=32%, signal=75%
GOBP_BICARBONATE_TRANSPORT	GOBP_BICARBONATE_TRANSPORT		21	0.253078	1.41947	0.104	0.233097	1	2500	tags=43%, list=18%, signal=52%
GOBP_REGULATION_OF_TUBE_SIZE	GOBP_REGULATION_OF_TUBE_SIZE		169	0.0944366	1.41912	0.112782	0.233199	1	3805	tags=36%, list=27%, signal=49%
GOBP_NEGATIVE_REGULATION_OF_MACROAUTOPHAGY	GOBP_NEGATIVE_REGULATION_OF_MACROAUTOPHAGY		34	0.202965	1.41891	0.086	0.233202	1	10504	tags=94%, list=74%, signal=359%
GOBP_REGULATION_OF_RECEPTOR_MEDIATED_ENDOCYTOSIS	GOBP_REGULATION_OF_RECEPTOR_MEDIATED_ENDOCYTOSIS		137	0.102167	1.4185	0.0975104	0.233372	1	2816	tags=30%, list=20%, signal=37%
GOBP_LIPID_DROPLET_ORGANIZATION	GOBP_LIPID_DROPLET_ORGANIZATION		34	0.206853	1.41678	0.103093	0.234817	1	7521	tags=74%, list=53%, signal=156%
GOBP_VASCULAR_ASSOCIATED_SMOOTH_MUSCLE_CELL_DEVELOPMENT	GOBP_VASCULAR_ASSOCIATED_SMOOTH_MUSCLE_CELL_DEVELOPMENT		15	0.298292	1.41635	0.10998	0.235002	1	3346	tags=53%, list=24%, signal=70%
GOBP_ESTABLISHMENT_OF_PROTEIN_LOCALIZATION_TO_PEROXISOME	GOBP_ESTABLISHMENT_OF_PROTEIN_LOCALIZATION_TO_PEROXISOME		19	0.268835	1.41622	0.09	0.234913	1	10402	tags=100%, list=73%, signal=372%
GOBP_PARAXIAL_MESODERM_DEVELOPMENT	GOBP_PARAXIAL_MESODERM_DEVELOPMENT		21	0.26113	1.416	0.0715746	0.234921	1	7126	tags=76%, list=50%, signal=152%
GOBP_REGULATION_OF_NUCLEOCYTOPLASMIC_TRANSPORT	GOBP_REGULATION_OF_NUCLEOCYTOPLASMIC_TRANSPORT		129	0.106156	1.41579	0.084453	0.234937	1	10409	tags=84%, list=73%, signal=309%
GOBP_POSITIVE_REGULATION_OF_GLIAL_CELL_PROLIFERATION	GOBP_POSITIVE_REGULATION_OF_GLIAL_CELL_PROLIFERATION		30	0.220196	1.41543	0.102784	0.235067	1	8251	tags=80%, list=58%, signal=190%
GOBP_NEGATIVE_REGULATION_OF_NOTCH_SIGNALING_PATHWAY	GOBP_NEGATIVE_REGULATION_OF_NOTCH_SIGNALING_PATHWAY		36	0.198406	1.41402	0.105906	0.236244	1	2715	tags=39%, list=19%, signal=48%
GOBP_REGULATION_OF_STEM_CELL_DIFFERENTIATION	GOBP_REGULATION_OF_STEM_CELL_DIFFERENTIATION		83	0.134404	1.41376	0.0942623	0.236277	1	6837	tags=61%, list=48%, signal=118%
GOBP_RUFFLE_ORGANIZATION	GOBP_RUFFLE_ORGANIZATION		51	0.170105	1.4135	0.0983302	0.236302	1	4002	tags=45%, list=28%, signal=63%
GOBP_HEMATOPOIETIC_STEM_CELL_PROLIFERATION	GOBP_HEMATOPOIETIC_STEM_CELL_PROLIFERATION		34	0.200372	1.41296	0.105578	0.236641	1	9286	tags=85%, list=65%, signal=245%
GOBP_NEGATIVE_REGULATION_OF_PROTEIN_TYROSINE_KINASE_ACTIVITY	GOBP_NEGATIVE_REGULATION_OF_PROTEIN_TYROSINE_KINASE_ACTIVITY		20	0.260182	1.41207	0.10124	0.237252	1	8392	tags=85%, list=59%, signal=207%
GOBP_PROTEIN_HYDROXYLATION	GOBP_PROTEIN_HYDROXYLATION		17	0.283085	1.41084	0.0973631	0.23821	1	8526	tags=88%, list=60%, signal=220%
GOBP_REGULATION_OF_PLASMA_MEMBRANE_ORGANIZATION	GOBP_REGULATION_OF_PLASMA_MEMBRANE_ORGANIZATION		16	0.295723	1.41078	0.10387	0.238042	1	6464	tags=75%, list=45%, signal=137%
GOBP_SYNAPTIC_MEMBRANE_ADHESION	GOBP_SYNAPTIC_MEMBRANE_ADHESION		36	0.199107	1.40899	0.107071	0.239572	1	1915	tags=33%, list=13%, signal=38%
GOBP_ASTROCYTE_DIFFERENTIATION	GOBP_ASTROCYTE_DIFFERENTIATION		86	0.131967	1.40883	0.118343	0.23951	1	8386	tags=72%, list=59%, signal=175%
GOBP_REGULATION_OF_ANIMAL_ORGAN_FORMATION	GOBP_REGULATION_OF_ANIMAL_ORGAN_FORMATION		29	0.225336	1.4088	0.100394	0.239313	1	7099	tags=72%, list=50%, signal=144%
GOBP_REGULATION_OF_ASTROCYTE_DIFFERENTIATION	GOBP_REGULATION_OF_ASTROCYTE_DIFFERENTIATION		35	0.20342	1.40867	0.0961145	0.239207	1	3208	tags=43%, list=23%, signal=55%
GOBP_MESENCHYMAL_TO_EPITHELIAL_TRANSITION	GOBP_MESENCHYMAL_TO_EPITHELIAL_TRANSITION		19	0.267724	1.40807	0.105042	0.239582	1	4430	tags=58%, list=31%, signal=84%
GOBP_REGULATION_OF_SYNAPTIC_VESICLE_EXOCYTOSIS	GOBP_REGULATION_OF_SYNAPTIC_VESICLE_EXOCYTOSIS		56	0.156529	1.40607	0.103448	0.241288	1	6162	tags=59%, list=43%, signal=104%
GOBP_CARTILAGE_CONDENSATION	GOBP_CARTILAGE_CONDENSATION		16	0.290228	1.40556	0.101594	0.241552	1	2098	tags=44%, list=15%, signal=51%
GOBP_MITOCHONDRIAL_RNA_PROCESSING	GOBP_MITOCHONDRIAL_RNA_PROCESSING		19	0.267535	1.4051	0.102249	0.241785	1	9672	tags=95%, list=68%, signal=296%
GOBP_NK_T_CELL_ACTIVATION	GOBP_NK_T_CELL_ACTIVATION		18	0.281329	1.40493	0.11368	0.241728	1	6274	tags=72%, list=44%, signal=129%
GOBP_NEGATIVE_REGULATION_OF_NERVOUS_SYSTEM_PROCESS	GOBP_NEGATIVE_REGULATION_OF_NERVOUS_SYSTEM_PROCESS		20	0.262408	1.40493	0.112016	0.241513	1	2672	tags=45%, list=19%, signal=55%
GOBP_ECTOPIC_GERM_CELL_PROGRAMMED_CELL_DEATH	GOBP_ECTOPIC_GERM_CELL_PROGRAMMED_CELL_DEATH		17	0.280468	1.40434	0.11546	0.24184	1	3544	tags=53%, list=25%, signal=70%
GOBP_PROTEOGLYCAN_METABOLIC_PROCESS	GOBP_PROTEOGLYCAN_METABOLIC_PROCESS		100	0.122309	1.40424	0.101031	0.241704	1	5809	tags=53%, list=41%, signal=89%
GOBP_ORGAN_INDUCTION	GOBP_ORGAN_INDUCTION		23	0.240257	1.40383	0.10119	0.241888	1	7099	tags=74%, list=50%, signal=147%
GOBP_PHOSPHATIDYLINOSITOL_METABOLIC_PROCESS	GOBP_PHOSPHATIDYLINOSITOL_METABOLIC_PROCESS		136	0.103948	1.40328	0.105159	0.242224	1	10560	tags=85%, list=74%, signal=325%
GOBP_REGULATION_OF_DNA_DAMAGE_CHECKPOINT	GOBP_REGULATION_OF_DNA_DAMAGE_CHECKPOINT		19	0.258492	1.40246	0.114625	0.242802	1	7555	tags=79%, list=53%, signal=168%
GOBP_REGULATION_OF_CHROMOSOME_SEGREGATION	GOBP_REGULATION_OF_CHROMOSOME_SEGREGATION		121	0.105541	1.40246	0.104449	0.242577	1	11204	tags=89%, list=79%, signal=417%
GOBP_HEART_FIELD_SPECIFICATION	GOBP_HEART_FIELD_SPECIFICATION		15	0.301056	1.40221	0.126233	0.242616	1	7099	tags=80%, list=50%, signal=160%
GOBP_NEGATIVE_REGULATION_OF_CELLULAR_RESPONSE_TO_INSULIN_STIMULUS	GOBP_NEGATIVE_REGULATION_OF_CELLULAR_RESPONSE_TO_INSULIN_STIMULUS		52	0.165793	1.40059	0.105042	0.244018	1	10230	tags=88%, list=72%, signal=314%
GOBP_GOLGI_TO_PLASMA_MEMBRANE_TRANSPORT	GOBP_GOLGI_TO_PLASMA_MEMBRANE_TRANSPORT		59	0.153539	1.40018	0.121272	0.244219	1	7948	tags=71%, list=56%, signal=161%
GOBP_ESTABLISHMENT_OF_PROTEIN_LOCALIZATION_TO_PLASMA_MEMBRANE	GOBP_ESTABLISHMENT_OF_PROTEIN_LOCALIZATION_TO_PLASMA_MEMBRANE		61	0.154368	1.39936	0.109504	0.244835	1	6439	tags=61%, list=45%, signal=110%
GOBP_CEREBELLAR_PURKINJE_CELL_LAYER_FORMATION	GOBP_CEREBELLAR_PURKINJE_CELL_LAYER_FORMATION		17	0.280621	1.39905	0.113636	0.244957	1	8561	tags=88%, list=60%, signal=221%
GOBP_METANEPHRIC_NEPHRON_DEVELOPMENT	GOBP_METANEPHRIC_NEPHRON_DEVELOPMENT		42	0.189331	1.39897	0.111111	0.244801	1	2732	tags=38%, list=19%, signal=47%
GOBP_LYMPH_VESSEL_MORPHOGENESIS	GOBP_LYMPH_VESSEL_MORPHOGENESIS		24	0.236896	1.3958	0.10757	0.247781	1	6709	tags=71%, list=47%, signal=134%
GOBP_HORMONE_MEDIATED_SIGNALING_PATHWAY	GOBP_HORMONE_MEDIATED_SIGNALING_PATHWAY		176	0.0902344	1.39546	0.104082	0.247917	1	8751	tags=70%, list=62%, signal=181%
GOBP_REGULATION_OF_SKELETAL_MUSCLE_CELL_PROLIFERATION	GOBP_REGULATION_OF_SKELETAL_MUSCLE_CELL_PROLIFERATION		15	0.298663	1.395	0.125253	0.248127	1	7133	tags=80%, list=50%, signal=160%
GOBP_REGULATION_OF_EXOCYTOSIS	GOBP_REGULATION_OF_EXOCYTOSIS		196	0.0857241	1.39485	0.0941884	0.248056	1	6270	tags=53%, list=44%, signal=93%
GOBP_VIRAL_LIFE_CYCLE	GOBP_VIRAL_LIFE_CYCLE		213	0.0840361	1.39422	0.107143	0.248463	1	6166	tags=52%, list=43%, signal=90%
GOBP_REGULATION_OF_TOLL_LIKE_RECEPTOR_4_SIGNALING_PATHWAY	GOBP_REGULATION_OF_TOLL_LIKE_RECEPTOR_4_SIGNALING_PATHWAY		26	0.235581	1.39381	0.111579	0.248682	1	9782	tags=92%, list=69%, signal=295%
GOBP_NEGATIVE_REGULATION_OF_ENDOPLASMIC_RETICULUM_UNFOLDED_PROTEIN_RESPONSE	GOBP_NEGATIVE_REGULATION_OF_ENDOPLASMIC_RETICULUM_UNFOLDED_PROTEIN_RESPONSE		17	0.279743	1.39344	0.0994036	0.248838	1	9410	tags=94%, list=66%, signal=278%
GOBP_POSITIVE_REGULATION_OF_NUCLEOTIDE_CATABOLIC_PROCESS	GOBP_POSITIVE_REGULATION_OF_NUCLEOTIDE_CATABOLIC_PROCESS		31	0.20358	1.39336	0.119748	0.248688	1	8120	tags=77%, list=57%, signal=180%
GOBP_CONNECTIVE_TISSUE_REPLACEMENT	GOBP_CONNECTIVE_TISSUE_REPLACEMENT		17	0.280869	1.3929	0.104294	0.248956	1	9394	tags=94%, list=66%, signal=277%
GOBP_ADENYLATE_CYCLASE_INHIBITING_G_PROTEIN_COUPLED_RECEPTOR_SIGNALING_PATHWAY	GOBP_ADENYLATE_CYCLASE_INHIBITING_G_PROTEIN_COUPLED_RECEPTOR_SIGNALING_PATHWAY		51	0.169128	1.39263	0.114165	0.24899	1	3737	tags=43%, list=26%, signal=58%
GOBP_NEGATIVE_REGULATION_OF_CELL_ADHESION	GOBP_NEGATIVE_REGULATION_OF_CELL_ADHESION		290	0.0710252	1.39251	0.0969697	0.248876	1	3472	tags=31%, list=24%, signal=41%
GOBP_INOSITOL_PHOSPHATE_METABOLIC_PROCESS	GOBP_INOSITOL_PHOSPHATE_METABOLIC_PROCESS		34	0.2027	1.39162	0.0848861	0.249486	1	2979	tags=41%, list=21%, signal=52%
GOBP_RESPONSE_TO_PROSTAGLANDIN_E	GOBP_RESPONSE_TO_PROSTAGLANDIN_E		22	0.244223	1.3912	0.111111	0.249694	1	5581	tags=64%, list=39%, signal=105%
GOBP_REGULATION_OF_CELL_CYCLE_PHASE_TRANSITION	GOBP_REGULATION_OF_CELL_CYCLE_PHASE_TRANSITION		396	0.0622092	1.38963	0.115721	0.251068	1	10092	tags=77%, list=71%, signal=258%
GOBP_REGULATION_OF_SPINDLE_ASSEMBLY	GOBP_REGULATION_OF_SPINDLE_ASSEMBLY		29	0.218632	1.38961	0.128834	0.250857	1	5723	tags=62%, list=40%, signal=104%
GOBP_VENOUS_BLOOD_VESSEL_DEVELOPMENT	GOBP_VENOUS_BLOOD_VESSEL_DEVELOPMENT		19	0.265359	1.38838	0.105263	0.251912	1	6709	tags=74%, list=47%, signal=139%
GOBP_EYE_PHOTORECEPTOR_CELL_DEVELOPMENT	GOBP_EYE_PHOTORECEPTOR_CELL_DEVELOPMENT		35	0.192961	1.38794	0.104651	0.252125	1	4169	tags=49%, list=29%, signal=69%
GOBP_POSTSYNAPSE_ASSEMBLY	GOBP_POSTSYNAPSE_ASSEMBLY		86	0.126527	1.38735	0.132411	0.252536	1	3006	tags=34%, list=21%, signal=43%
GOBP_PROTEOGLYCAN_BIOSYNTHETIC_PROCESS	GOBP_PROTEOGLYCAN_BIOSYNTHETIC_PROCESS		70	0.139531	1.38734	0.118367	0.252313	1	5135	tags=50%, list=36%, signal=78%
GOBP_NEURON_PROJECTION_ARBORIZATION	GOBP_NEURON_PROJECTION_ARBORIZATION		35	0.195084	1.38652	0.131373	0.252914	1	1701	tags=31%, list=12%, signal=36%
GOBP_CELLULAR_RESPONSE_TO_ALCOHOL	GOBP_CELLULAR_RESPONSE_TO_ALCOHOL		111	0.112414	1.38573	0.107422	0.25345	1	1872	tags=24%, list=13%, signal=28%
GOBP_CALCIUM_ION_HOMEOSTASIS	GOBP_CALCIUM_ION_HOMEOSTASIS		304	0.0684795	1.38421	0.0967742	0.25485	1	2648	tags=25%, list=19%, signal=30%
GOBP_VENTRICULAR_SEPTUM_DEVELOPMENT	GOBP_VENTRICULAR_SEPTUM_DEVELOPMENT		78	0.132828	1.38404	0.115094	0.254776	1	8695	tags=74%, list=61%, signal=190%
GOBP_TRABECULA_FORMATION	GOBP_TRABECULA_FORMATION		28	0.220403	1.38397	0.107143	0.254624	1	5505	tags=61%, list=39%, signal=99%
GOBP_PROGRAMMED_CELL_DEATH_INVOLVED_IN_CELL_DEVELOPMENT	GOBP_PROGRAMMED_CELL_DEATH_INVOLVED_IN_CELL_DEVELOPMENT		26	0.224892	1.38308	0.106542	0.255279	1	6105	tags=65%, list=43%, signal=114%
GOBP_RESPONSE_TO_FLUID_SHEAR_STRESS	GOBP_RESPONSE_TO_FLUID_SHEAR_STRESS		33	0.206021	1.38269	0.106212	0.255429	1	3971	tags=48%, list=28%, signal=67%
GOBP_REGULATION_OF_POSTSYNAPTIC_MEMBRANE_POTENTIAL	GOBP_REGULATION_OF_POSTSYNAPTIC_MEMBRANE_POTENTIAL		116	0.109553	1.38267	0.118577	0.255212	1	2009	tags=25%, list=14%, signal=29%
GOBP_RESPONSE_TO_FATTY_ACID	GOBP_RESPONSE_TO_FATTY_ACID		70	0.138821	1.38261	0.114458	0.255043	1	2504	tags=31%, list=18%, signal=38%
GOBP_REGULATION_OF_NEURAL_PRECURSOR_CELL_PROLIFERATION	GOBP_REGULATION_OF_NEURAL_PRECURSOR_CELL_PROLIFERATION		109	0.112775	1.38217	0.123732	0.255269	1	6627	tags=58%, list=47%, signal=107%
GOBP_MESODERM_MORPHOGENESIS	GOBP_MESODERM_MORPHOGENESIS		70	0.14274	1.38065	0.118343	0.256631	1	6918	tags=63%, list=49%, signal=122%
GOBP_MRNA_EXPORT_FROM_NUCLEUS	GOBP_MRNA_EXPORT_FROM_NUCLEUS		56	0.1559	1.38062	0.097561	0.256434	1	10488	tags=89%, list=74%, signal=339%
GOBP_EMBRYONIC_HINDLIMB_MORPHOGENESIS	GOBP_EMBRYONIC_HINDLIMB_MORPHOGENESIS		29	0.21457	1.38053	0.131631	0.256272	1	2348	tags=38%, list=17%, signal=45%
GOBP_POSITIVE_REGULATION_OF_AUTOPHAGY	GOBP_POSITIVE_REGULATION_OF_AUTOPHAGY		148	0.0975824	1.38031	0.116773	0.2563	1	9868	tags=79%, list=69%, signal=256%
GOBP_EPITHELIAL_CELL_FATE_COMMITMENT	GOBP_EPITHELIAL_CELL_FATE_COMMITMENT		16	0.294412	1.38021	0.102362	0.256179	1	4705	tags=63%, list=33%, signal=93%
GOBP_NEGATIVE_REGULATION_OF_CELL_JUNCTION_ASSEMBLY	GOBP_NEGATIVE_REGULATION_OF_CELL_JUNCTION_ASSEMBLY		34	0.19806	1.37976	0.139059	0.256415	1	8064	tags=76%, list=57%, signal=176%
GOBP_NEGATIVE_REGULATION_OF_INTERLEUKIN_2_PRODUCTION	GOBP_NEGATIVE_REGULATION_OF_INTERLEUKIN_2_PRODUCTION		26	0.228786	1.37817	0.112554	0.257873	1	2221	tags=38%, list=16%, signal=45%
GOBP_INTRACELLULAR_GLUCOSE_HOMEOSTASIS	GOBP_INTRACELLULAR_GLUCOSE_HOMEOSTASIS		180	0.0893225	1.37814	0.110664	0.25766	1	1273	tags=18%, list=9%, signal=19%
GOBP_EPIGENETIC_PROGRAMMING_OF_GENE_EXPRESSION	GOBP_EPIGENETIC_PROGRAMMING_OF_GENE_EXPRESSION		33	0.201948	1.3781	0.105058	0.257492	1	9631	tags=88%, list=68%, signal=272%
GOBP_SYNAPTIC_VESICLE_TRANSPORT	GOBP_SYNAPTIC_VESICLE_TRANSPORT		48	0.172598	1.37786	0.129412	0.257527	1	4367	tags=48%, list=31%, signal=69%
GOBP_RESPONSE_TO_NICOTINE	GOBP_RESPONSE_TO_NICOTINE		44	0.173892	1.3775	0.114823	0.25766	1	2705	tags=36%, list=19%, signal=45%
GOBP_NEGATIVE_REGULATION_OF_NEURAL_PRECURSOR_CELL_PROLIFERATION	GOBP_NEGATIVE_REGULATION_OF_NEURAL_PRECURSOR_CELL_PROLIFERATION		31	0.205385	1.37676	0.120553	0.258239	1	1672	tags=32%, list=12%, signal=36%
GOBP_POSITIVE_REGULATION_OF_TRANSLATIONAL_INITIATION	GOBP_POSITIVE_REGULATION_OF_TRANSLATIONAL_INITIATION		23	0.236638	1.37602	0.117769	0.258738	1	8387	tags=83%, list=59%, signal=201%
GOBP_REGULATION_OF_MEMBRANE_INVAGINATION	GOBP_REGULATION_OF_MEMBRANE_INVAGINATION		21	0.247921	1.37591	0.118012	0.258633	1	5282	tags=62%, list=37%, signal=98%
GOBP_REGULATION_OF_CELLULAR_RESPONSE_TO_HYPOXIA	GOBP_REGULATION_OF_CELLULAR_RESPONSE_TO_HYPOXIA		22	0.251138	1.37502	0.121145	0.259382	1	4190	tags=55%, list=29%, signal=77%
GOBP_DEVELOPMENT_OF_PRIMARY_SEXUAL_CHARACTERISTICS	GOBP_DEVELOPMENT_OF_PRIMARY_SEXUAL_CHARACTERISTICS		229	0.0788838	1.37385	0.12426	0.260346	1	4919	tags=42%, list=35%, signal=64%
GOBP_VESICLE_TETHERING	GOBP_VESICLE_TETHERING		26	0.227136	1.37363	0.109848	0.260368	1	8261	tags=81%, list=58%, signal=192%
GOBP_ENSHEATHMENT_OF_NEURONS	GOBP_ENSHEATHMENT_OF_NEURONS		164	0.0922125	1.37334	0.118367	0.260436	1	4079	tags=38%, list=29%, signal=52%
GOBP_MITOTIC_CELL_CYCLE_CHECKPOINT_SIGNALING	GOBP_MITOTIC_CELL_CYCLE_CHECKPOINT_SIGNALING		125	0.105716	1.37269	0.146586	0.260894	1	10682	tags=86%, list=75%, signal=341%
GOBP_POSITIVE_REGULATION_OF_MEMBRANE_INVAGINATION	GOBP_POSITIVE_REGULATION_OF_MEMBRANE_INVAGINATION		17	0.275896	1.37227	0.119048	0.26114	1	5282	tags=65%, list=37%, signal=103%
GOBP_ESTROGEN_RECEPTOR_SIGNALING_PATHWAY	GOBP_ESTROGEN_RECEPTOR_SIGNALING_PATHWAY		41	0.180911	1.37199	0.125737	0.261211	1	8533	tags=78%, list=60%, signal=195%
GOBP_NEURAL_NUCLEUS_DEVELOPMENT	GOBP_NEURAL_NUCLEUS_DEVELOPMENT		26	0.225805	1.37184	0.11499	0.26115	1	6639	tags=69%, list=47%, signal=130%
GOBP_NEUROTRANSMITTER_GATED_ION_CHANNEL_CLUSTERING	GOBP_NEUROTRANSMITTER_GATED_ION_CHANNEL_CLUSTERING		17	0.270748	1.37137	0.105263	0.261357	1	2009	tags=41%, list=14%, signal=48%
GOBP_SUBSTRATE_ADHESION_DEPENDENT_CELL_SPREADING	GOBP_SUBSTRATE_ADHESION_DEPENDENT_CELL_SPREADING		93	0.1222	1.37119	0.110895	0.26133	1	6377	tags=57%, list=45%, signal=103%
GOBP_NEGATIVE_REGULATION_OF_STEM_CELL_DIFFERENTIATION	GOBP_NEGATIVE_REGULATION_OF_STEM_CELL_DIFFERENTIATION		28	0.218319	1.37043	0.11619	0.261899	1	3503	tags=46%, list=25%, signal=61%
GOBP_REGULATION_OF_ENDOCYTIC_RECYCLING	GOBP_REGULATION_OF_ENDOCYTIC_RECYCLING		20	0.259587	1.36984	0.133843	0.262275	1	2001	tags=40%, list=14%, signal=46%
GOBP_POSTSYNAPTIC_SPECIALIZATION_ORGANIZATION	GOBP_POSTSYNAPTIC_SPECIALIZATION_ORGANIZATION		61	0.149761	1.36956	0.111562	0.262375	1	2541	tags=33%, list=18%, signal=40%
GOBP_PLACENTA_DEVELOPMENT	GOBP_PLACENTA_DEVELOPMENT		175	0.090156	1.36929	0.115538	0.262443	1	8728	tags=70%, list=61%, signal=180%
GOBP_CHONDROCYTE_DIFFERENTIATION	GOBP_CHONDROCYTE_DIFFERENTIATION		116	0.109891	1.36881	0.127451	0.262699	1	2985	tags=32%, list=21%, signal=40%
GOBP_MESENCHYMAL_CELL_MIGRATION	GOBP_MESENCHYMAL_CELL_MIGRATION		60	0.151138	1.36867	0.137214	0.262631	1	1651	tags=27%, list=12%, signal=30%
GOBP_NEGATIVE_REGULATION_OF_SMALL_MOLECULE_METABOLIC_PROCESS	GOBP_NEGATIVE_REGULATION_OF_SMALL_MOLECULE_METABOLIC_PROCESS		119	0.105388	1.36835	0.112648	0.26276	1	3532	tags=35%, list=25%, signal=47%
GOBP_NEGATIVE_REGULATION_OF_WOUND_HEALING	GOBP_NEGATIVE_REGULATION_OF_WOUND_HEALING		65	0.14389	1.36833	0.118998	0.262558	1	2119	tags=29%, list=15%, signal=34%
GOBP_ADENYLATE_CYCLASE_ACTIVATING_ADRENERGIC_RECEPTOR_SIGNALING_PATHWAY	GOBP_ADENYLATE_CYCLASE_ACTIVATING_ADRENERGIC_RECEPTOR_SIGNALING_PATHWAY		15	0.292585	1.36823	0.132184	0.262443	1	2479	tags=47%, list=17%, signal=56%
GOBP_BLASTOCYST_DEVELOPMENT	GOBP_BLASTOCYST_DEVELOPMENT		139	0.101276	1.36805	0.135246	0.262404	1	9213	tags=75%, list=65%, signal=210%
GOBP_SISTER_CHROMATID_COHESION	GOBP_SISTER_CHROMATID_COHESION		49	0.168406	1.36726	0.134809	0.263008	1	10092	tags=88%, list=71%, signal=301%
GOBP_POSITIVE_REGULATION_OF_CHOLESTEROL_EFFLUX	GOBP_POSITIVE_REGULATION_OF_CHOLESTEROL_EFFLUX		32	0.203727	1.36708	0.12395	0.262983	1	3330	tags=44%, list=23%, signal=57%
GOBP_PROTEIN_MONOUBIQUITINATION	GOBP_PROTEIN_MONOUBIQUITINATION		50	0.159785	1.36671	0.117647	0.263145	1	10818	tags=92%, list=76%, signal=383%
GOBP_ORGANELLE_DISASSEMBLY	GOBP_ORGANELLE_DISASSEMBLY		59	0.151666	1.36586	0.127237	0.263798	1	11349	tags=95%, list=80%, signal=468%
GOBP_LONG_CHAIN_FATTY_ACID_TRANSPORT	GOBP_LONG_CHAIN_FATTY_ACID_TRANSPORT		59	0.149966	1.36552	0.129666	0.263953	1	3660	tags=41%, list=26%, signal=55%
GOBP_RAP_PROTEIN_SIGNAL_TRANSDUCTION	GOBP_RAP_PROTEIN_SIGNAL_TRANSDUCTION		15	0.292585	1.36476	0.142	0.264533	1	2479	tags=47%, list=17%, signal=56%
GOBP_MONOSACCHARIDE_TRANSMEMBRANE_TRANSPORT	GOBP_MONOSACCHARIDE_TRANSMEMBRANE_TRANSPORT		103	0.115257	1.36329	0.13125	0.265871	1	4861	tags=46%, list=34%, signal=69%
GOBP_REGULATION_OF_SYNAPTIC_VESICLE_CYCLE	GOBP_REGULATION_OF_SYNAPTIC_VESICLE_CYCLE		18	0.260414	1.36213	0.133588	0.266852	1	5781	tags=67%, list=41%, signal=112%
GOBP_REGULATION_OF_MONOCYTE_CHEMOTAXIS	GOBP_REGULATION_OF_MONOCYTE_CHEMOTAXIS		29	0.211707	1.36114	0.122772	0.267668	1	2879	tags=41%, list=20%, signal=52%
GOBP_CARBOHYDRATE_TRANSPORT	GOBP_CARBOHYDRATE_TRANSPORT		119	0.104363	1.3611	0.117761	0.267487	1	4861	tags=45%, list=34%, signal=67%
GOBP_REGULATION_OF_NEURON_PROJECTION_REGENERATION	GOBP_REGULATION_OF_NEURON_PROJECTION_REGENERATION		37	0.18874	1.36068	0.103922	0.267674	1	6162	tags=62%, list=43%, signal=109%
GOBP_BIOLOGICAL_PROCESS_INVOLVED_IN_INTERACTION_WITH_HOST	GOBP_BIOLOGICAL_PROCESS_INVOLVED_IN_INTERACTION_WITH_HOST		125	0.103946	1.3601	0.112	0.268124	1	6270	tags=54%, list=44%, signal=96%
GOBP_VESICLE_TRANSPORT_ALONG_MICROTUBULE	GOBP_VESICLE_TRANSPORT_ALONG_MICROTUBULE		41	0.181336	1.35994	0.126195	0.268055	1	6099	tags=61%, list=43%, signal=106%
GOBP_MEMORY	GOBP_MEMORY		152	0.0928638	1.35953	0.119545	0.268283	1	5803	tags=50%, list=41%, signal=84%
GOBP_ADRENAL_GLAND_DEVELOPMENT	GOBP_ADRENAL_GLAND_DEVELOPMENT		26	0.222435	1.35896	0.131148	0.268654	1	4499	tags=54%, list=32%, signal=79%
GOBP_ORGANOPHOSPHATE_ESTER_TRANSPORT	GOBP_ORGANOPHOSPHATE_ESTER_TRANSPORT		142	0.0970654	1.35853	0.1125	0.268855	1	1737	tags=22%, list=12%, signal=25%
GOBP_REGULATION_OF_OSTEOBLAST_PROLIFERATION	GOBP_REGULATION_OF_OSTEOBLAST_PROLIFERATION		28	0.219713	1.35833	0.141176	0.268836	1	4499	tags=54%, list=32%, signal=78%
GOBP_NEGATIVE_REGULATION_OF_ORGANELLE_ASSEMBLY	GOBP_NEGATIVE_REGULATION_OF_ORGANELLE_ASSEMBLY		46	0.169959	1.35817	0.137725	0.268785	1	8101	tags=74%, list=57%, signal=171%
GOBP_MICROTUBULE_POLYMERIZATION	GOBP_MICROTUBULE_POLYMERIZATION		83	0.123368	1.35724	0.121272	0.269558	1	5965	tags=54%, list=42%, signal=93%
GOBP_CEREBRAL_CORTEX_NEURON_DIFFERENTIATION	GOBP_CEREBRAL_CORTEX_NEURON_DIFFERENTIATION		23	0.239847	1.35667	0.126923	0.269928	1	3395	tags=48%, list=24%, signal=63%
GOBP_MESODERM_DEVELOPMENT	GOBP_MESODERM_DEVELOPMENT		108	0.110792	1.35653	0.119919	0.269845	1	7126	tags=61%, list=50%, signal=122%
GOBP_PROTEIN_KINASE_C_SIGNALING	GOBP_PROTEIN_KINASE_C_SIGNALING		22	0.24294	1.35535	0.131631	0.270877	1	3660	tags=50%, list=26%, signal=67%
GOBP_CELLULAR_RESPONSE_TO_EXTERNAL_STIMULUS	GOBP_CELLULAR_RESPONSE_TO_EXTERNAL_STIMULUS		73	0.13642	1.35524	0.129293	0.27077	1	9173	tags=78%, list=65%, signal=219%
GOBP_CELL_MIGRATION_INVOLVED_IN_HEART_DEVELOPMENT	GOBP_CELL_MIGRATION_INVOLVED_IN_HEART_DEVELOPMENT		19	0.256921	1.35521	0.145038	0.270574	1	2338	tags=42%, list=16%, signal=50%
GOBP_GLYCEROLIPID_CATABOLIC_PROCESS	GOBP_GLYCEROLIPID_CATABOLIC_PROCESS		66	0.140864	1.35519	0.129897	0.27036	1	2099	tags=29%, list=15%, signal=34%
GOBP_NEGATIVE_REGULATION_OF_PROTEIN_BINDING	GOBP_NEGATIVE_REGULATION_OF_PROTEIN_BINDING		73	0.13509	1.35517	0.119342	0.270153	1	3932	tags=41%, list=28%, signal=57%
GOBP_SEGMENT_SPECIFICATION	GOBP_SEGMENT_SPECIFICATION		19	0.256921	1.35406	0.126556	0.271137	1	2338	tags=42%, list=16%, signal=50%
GOBP_APOPTOTIC_CELL_CLEARANCE	GOBP_APOPTOTIC_CELL_CLEARANCE		37	0.193128	1.35401	0.14881	0.270959	1	4178	tags=49%, list=29%, signal=69%
GOBP_CORPUS_CALLOSUM_DEVELOPMENT	GOBP_CORPUS_CALLOSUM_DEVELOPMENT		32	0.199798	1.35396	0.123732	0.270806	1	6941	tags=69%, list=49%, signal=134%
GOBP_CELL_AGGREGATION	GOBP_CELL_AGGREGATION		20	0.252757	1.35286	0.119284	0.271688	1	2098	tags=40%, list=15%, signal=47%
GOBP_POSITIVE_REGULATION_OF_LIPID_LOCALIZATION	GOBP_POSITIVE_REGULATION_OF_LIPID_LOCALIZATION		113	0.106353	1.35248	0.126233	0.271873	1	3155	tags=33%, list=22%, signal=42%
GOBP_CELL_MATURATION	GOBP_CELL_MATURATION		185	0.0853042	1.35182	0.128968	0.272384	1	1569	tags=19%, list=11%, signal=22%
GOBP_POSITIVE_REGULATION_OF_CELL_SUBSTRATE_ADHESION	GOBP_POSITIVE_REGULATION_OF_CELL_SUBSTRATE_ADHESION		128	0.0992769	1.35017	0.126531	0.273937	1	6377	tags=55%, list=45%, signal=98%
GOBP_SPECIFICATION_OF_ANIMAL_ORGAN_IDENTITY	GOBP_SPECIFICATION_OF_ANIMAL_ORGAN_IDENTITY		35	0.186913	1.34967	0.126819	0.274231	1	7099	tags=69%, list=50%, signal=137%
GOBP_VESICLE_CARGO_LOADING	GOBP_VESICLE_CARGO_LOADING		27	0.218788	1.34947	0.122288	0.274234	1	8481	tags=81%, list=60%, signal=201%
GOBP_TONGUE_DEVELOPMENT	GOBP_TONGUE_DEVELOPMENT		26	0.218576	1.34934	0.120459	0.274143	1	1272	tags=31%, list=9%, signal=34%
GOBP_NEURON_PROJECTION_EXTENSION	GOBP_NEURON_PROJECTION_EXTENSION		181	0.084994	1.34883	0.120079	0.274473	1	2577	tags=27%, list=18%, signal=32%
GOBP_NEGATIVE_REGULATION_OF_GROWTH	GOBP_NEGATIVE_REGULATION_OF_GROWTH		232	0.0762693	1.3484	0.149688	0.274687	1	5307	tags=45%, list=37%, signal=70%
GOBP_RESPONSE_TO_AXON_INJURY	GOBP_RESPONSE_TO_AXON_INJURY		91	0.119422	1.34825	0.122699	0.274625	1	4250	tags=42%, list=30%, signal=59%
GOBP_REGULATION_OF_TELOMERE_MAINTENANCE	GOBP_REGULATION_OF_TELOMERE_MAINTENANCE		96	0.11809	1.34646	0.127349	0.276304	1	9293	tags=77%, list=65%, signal=221%
GOBP_POSITIVE_REGULATION_OF_MEIOTIC_NUCLEAR_DIVISION	GOBP_POSITIVE_REGULATION_OF_MEIOTIC_NUCLEAR_DIVISION		18	0.261752	1.34599	0.136752	0.276581	1	5762	tags=67%, list=41%, signal=112%
GOBP_REGULATION_OF_CELLULAR_EXTRAVASATION	GOBP_REGULATION_OF_CELLULAR_EXTRAVASATION		41	0.176957	1.34596	0.141434	0.276381	1	1652	tags=29%, list=12%, signal=33%
GOBP_NUCLEAR_TRANSCRIBED_MRNA_POLY_A_TAIL_SHORTENING	GOBP_NUCLEAR_TRANSCRIBED_MRNA_POLY_A_TAIL_SHORTENING		22	0.239889	1.34589	0.145957	0.276211	1	9521	tags=91%, list=67%, signal=275%
GOBP_NEGATIVE_REGULATION_OF_MYOBLAST_DIFFERENTIATION	GOBP_NEGATIVE_REGULATION_OF_MYOBLAST_DIFFERENTIATION		30	0.206854	1.3454	0.118343	0.276483	1	3700	tags=47%, list=26%, signal=63%
GOBP_REGULATION_OF_CARDIOCYTE_DIFFERENTIATION	GOBP_REGULATION_OF_CARDIOCYTE_DIFFERENTIATION		26	0.224808	1.34514	0.138211	0.276543	1	8841	tags=85%, list=62%, signal=223%
GOBP_KIDNEY_MORPHOGENESIS	GOBP_KIDNEY_MORPHOGENESIS		105	0.113326	1.34491	0.126459	0.276592	1	4494	tags=43%, list=32%, signal=62%
GOBP_DNA_CATABOLIC_PROCESS	GOBP_DNA_CATABOLIC_PROCESS		32	0.20114	1.34489	0.127016	0.276386	1	9144	tags=84%, list=64%, signal=236%
GOBP_REGULATION_OF_CILIUM_ASSEMBLY	GOBP_REGULATION_OF_CILIUM_ASSEMBLY		67	0.139704	1.34433	0.140787	0.276774	1	5026	tags=49%, list=35%, signal=76%
GOBP_INTERSTRAND_CROSS_LINK_REPAIR	GOBP_INTERSTRAND_CROSS_LINK_REPAIR		25	0.221879	1.34367	0.136719	0.277259	1	8226	tags=80%, list=58%, signal=189%
GOBP_PROTEIN_TARGETING_TO_LYSOSOME	GOBP_PROTEIN_TARGETING_TO_LYSOSOME		27	0.212315	1.34174	0.129167	0.279207	1	10153	tags=93%, list=71%, signal=323%
GOBP_MITOTIC_NUCLEAR_DIVISION	GOBP_MITOTIC_NUCLEAR_DIVISION		245	0.0756796	1.34158	0.136986	0.279159	1	11479	tags=88%, list=81%, signal=449%
GOBP_REGULATION_OF_VIRAL_GENOME_REPLICATION	GOBP_REGULATION_OF_VIRAL_GENOME_REPLICATION		75	0.131692	1.34155	0.125954	0.27896	1	5531	tags=52%, list=39%, signal=85%
GOBP_NEGATIVE_REGULATION_OF_MAP_KINASE_ACTIVITY	GOBP_NEGATIVE_REGULATION_OF_MAP_KINASE_ACTIVITY		49	0.164148	1.34096	0.146586	0.279394	1	8411	tags=76%, list=59%, signal=184%
GOBP_NEGATIVE_CHEMOTAXIS	GOBP_NEGATIVE_CHEMOTAXIS		41	0.176382	1.34079	0.143137	0.279346	1	2007	tags=32%, list=14%, signal=37%
GOBP_GLOMERULUS_DEVELOPMENT	GOBP_GLOMERULUS_DEVELOPMENT		79	0.129211	1.34044	0.134921	0.27951	1	2492	tags=30%, list=18%, signal=37%
GOBP_STRESS_ACTIVATED_PROTEIN_KINASE_SIGNALING_CASCADE	GOBP_STRESS_ACTIVATED_PROTEIN_KINASE_SIGNALING_CASCADE		54	0.155694	1.34036	0.140385	0.279365	1	8064	tags=72%, list=57%, signal=166%
GOBP_REGULATION_OF_DEVELOPMENTAL_GROWTH	GOBP_REGULATION_OF_DEVELOPMENTAL_GROWTH		347	0.0620816	1.34029	0.112621	0.2792	1	5490	tags=45%, list=39%, signal=71%
GOBP_REGULATION_OF_HEMATOPOIETIC_PROGENITOR_CELL_DIFFERENTIATION	GOBP_REGULATION_OF_HEMATOPOIETIC_PROGENITOR_CELL_DIFFERENTIATION		41	0.18073	1.3391	0.148649	0.280228	1	7495	tags=71%, list=53%, signal=149%
GOBP_MULTICELLULAR_ORGANISMAL_LEVEL_CHEMICAL_HOMEOSTASIS	GOBP_MULTICELLULAR_ORGANISMAL_LEVEL_CHEMICAL_HOMEOSTASIS		86	0.123793	1.33909	0.129897	0.280004	1	3210	tags=35%, list=23%, signal=45%
GOBP_APPENDAGE_MORPHOGENESIS	GOBP_APPENDAGE_MORPHOGENESIS		151	0.0921095	1.3388	0.14717	0.280036	1	5013	tags=44%, list=35%, signal=68%
GOBP_REGULATION_OF_ACTION_POTENTIAL	GOBP_REGULATION_OF_ACTION_POTENTIAL		65	0.140937	1.33766	0.132924	0.281065	1	5005	tags=49%, list=35%, signal=76%
GOBP_REGULATION_OF_DENDRITIC_SPINE_DEVELOPMENT	GOBP_REGULATION_OF_DENDRITIC_SPINE_DEVELOPMENT		86	0.120862	1.33691	0.136555	0.281659	1	6724	tags=59%, list=47%, signal=112%
GOBP_REGULATION_OF_KERATINOCYTE_DIFFERENTIATION	GOBP_REGULATION_OF_KERATINOCYTE_DIFFERENTIATION		33	0.197745	1.33372	0.123047	0.284969	1	7105	tags=70%, list=50%, signal=139%
GOBP_STRESS_GRANULE_ASSEMBLY	GOBP_STRESS_GRANULE_ASSEMBLY		35	0.189398	1.33365	0.149712	0.284803	1	8689	tags=80%, list=61%, signal=205%
GOBP_POSITIVE_REGULATION_OF_AXONOGENESIS	GOBP_POSITIVE_REGULATION_OF_AXONOGENESIS		89	0.117927	1.33248	0.140316	0.285968	1	6162	tags=55%, list=43%, signal=97%
GOBP_POSITIVE_REGULATION_OF_MACROAUTOPHAGY	GOBP_POSITIVE_REGULATION_OF_MACROAUTOPHAGY		85	0.121694	1.3324	0.12	0.285817	1	8819	tags=74%, list=62%, signal=194%
GOBP_ANTEROGRADE_AXONAL_TRANSPORT	GOBP_ANTEROGRADE_AXONAL_TRANSPORT		42	0.175899	1.33219	0.131313	0.28581	1	6647	tags=64%, list=47%, signal=120%
GOBP_REGULATION_OF_THE_FORCE_OF_HEART_CONTRACTION	GOBP_REGULATION_OF_THE_FORCE_OF_HEART_CONTRACTION		29	0.208986	1.33054	0.146751	0.287462	1	3408	tags=45%, list=24%, signal=59%
GOBP_MUSCLE_ORGAN_DEVELOPMENT	GOBP_MUSCLE_ORGAN_DEVELOPMENT		323	0.063723	1.33009	0.137736	0.28774	1	4837	tags=40%, list=34%, signal=60%
GOBP_NEGATIVE_REGULATION_OF_LEUKOCYTE_MIGRATION	GOBP_NEGATIVE_REGULATION_OF_LEUKOCYTE_MIGRATION		42	0.174193	1.33009	0.144603	0.287518	1	5994	tags=60%, list=42%, signal=103%
GOBP_MALE_MEIOSIS_I	GOBP_MALE_MEIOSIS_I		20	0.246729	1.32979	0.146718	0.287618	1	7872	tags=80%, list=55%, signal=179%
GOBP_WHITE_FAT_CELL_DIFFERENTIATION	GOBP_WHITE_FAT_CELL_DIFFERENTIATION		20	0.249306	1.32893	0.161034	0.288336	1	2147	tags=40%, list=15%, signal=47%
GOBP_MITOCHONDRION_DISTRIBUTION	GOBP_MITOCHONDRION_DISTRIBUTION		25	0.221693	1.328	0.143725	0.289166	1	10504	tags=96%, list=74%, signal=367%
GOBP_REGULATION_OF_MITOTIC_CELL_CYCLE_PHASE_TRANSITION	GOBP_REGULATION_OF_MITOTIC_CELL_CYCLE_PHASE_TRANSITION		306	0.0655708	1.32773	0.132797	0.289266	1	12564	tags=95%, list=88%, signal=796%
GOBP_ANTIGEN_PROCESSING_AND_PRESENTATION_OF_EXOGENOUS_ANTIGEN	GOBP_ANTIGEN_PROCESSING_AND_PRESENTATION_OF_EXOGENOUS_ANTIGEN		39	0.175437	1.32739	0.159449	0.289382	1	1522	tags=28%, list=11%, signal=31%
GOBP_REGULATION_OF_POSTSYNAPTIC_MEMBRANE_NEUROTRANSMITTER_RECEPTOR_LEVELS	GOBP_REGULATION_OF_POSTSYNAPTIC_MEMBRANE_NEUROTRANSMITTER_RECEPTOR_LEVELS		144	0.0952302	1.32637	0.134737	0.290323	1	6559	tags=56%, list=46%, signal=102%
GOBP_POSITIVE_REGULATION_OF_KINASE_ACTIVITY	GOBP_POSITIVE_REGULATION_OF_KINASE_ACTIVITY		257	0.0715971	1.32591	0.146939	0.290599	1	3924	tags=35%, list=28%, signal=47%
GOBP_HOMOTYPIC_CELL_CELL_ADHESION	GOBP_HOMOTYPIC_CELL_CELL_ADHESION		85	0.122929	1.32576	0.150106	0.290551	1	1942	tags=26%, list=14%, signal=30%
GOBP_NEGATIVE_REGULATION_OF_D_GLUCOSE_TRANSMEMBRANE_TRANSPORT	GOBP_NEGATIVE_REGULATION_OF_D_GLUCOSE_TRANSMEMBRANE_TRANSPORT		20	0.246282	1.32529	0.162933	0.290825	1	2901	tags=45%, list=20%, signal=56%
GOBP_MITOTIC_RECOMBINATION	GOBP_MITOTIC_RECOMBINATION		23	0.226143	1.32517	0.153226	0.290728	1	8536	tags=83%, list=60%, signal=206%
GOBP_PULMONARY_VALVE_DEVELOPMENT	GOBP_PULMONARY_VALVE_DEVELOPMENT		24	0.2253	1.32517	0.148305	0.290496	1	5096	tags=58%, list=36%, signal=91%
GOBP_NEGATIVE_REGULATION_OF_GLUCONEOGENESIS	GOBP_NEGATIVE_REGULATION_OF_GLUCONEOGENESIS		21	0.237552	1.32484	0.133595	0.290648	1	8138	tags=81%, list=57%, signal=189%
GOBP_ANOIKIS	GOBP_ANOIKIS		28	0.210994	1.32422	0.138277	0.291108	1	8178	tags=79%, list=58%, signal=185%
GOBP_APOPTOTIC_PROCESS_INVOLVED_IN_DEVELOPMENT	GOBP_APOPTOTIC_PROCESS_INVOLVED_IN_DEVELOPMENT		37	0.182979	1.32305	0.144869	0.292148	1	5475	tags=57%, list=38%, signal=92%
GOBP_REGULATION_OF_RESPONSE_TO_CYTOKINE_STIMULUS	GOBP_REGULATION_OF_RESPONSE_TO_CYTOKINE_STIMULUS		156	0.0924954	1.32292	0.126531	0.292093	1	8908	tags=72%, list=63%, signal=190%
GOBP_POSITIVE_REGULATION_OF_D_GLUCOSE_IMPORT	GOBP_POSITIVE_REGULATION_OF_D_GLUCOSE_IMPORT		36	0.186361	1.3217	0.15625	0.293244	1	4861	tags=53%, list=34%, signal=80%
GOBP_TYROSINE_PHOSPHORYLATION_OF_STAT_PROTEIN	GOBP_TYROSINE_PHOSPHORYLATION_OF_STAT_PROTEIN		62	0.142651	1.32136	0.157576	0.293394	1	2796	tags=34%, list=20%, signal=42%
GOBP_REGULATION_OF_IMMATURE_T_CELL_PROLIFERATION	GOBP_REGULATION_OF_IMMATURE_T_CELL_PROLIFERATION		16	0.270957	1.31902	0.145791	0.295861	1	5927	tags=69%, list=42%, signal=118%
GOBP_REGULATION_OF_SISTER_CHROMATID_SEGREGATION	GOBP_REGULATION_OF_SISTER_CHROMATID_SEGREGATION		98	0.113699	1.31885	0.143713	0.295828	1	11018	tags=89%, list=77%, signal=391%
GOBP_EPITHELIAL_CELL_DIFFERENTIATION_INVOLVED_IN_KIDNEY_DEVELOPMENT	GOBP_EPITHELIAL_CELL_DIFFERENTIATION_INVOLVED_IN_KIDNEY_DEVELOPMENT		52	0.154998	1.31716	0.164093	0.297551	1	2452	tags=33%, list=17%, signal=39%
GOBP_TYPE_B_PANCREATIC_CELL_DEVELOPMENT	GOBP_TYPE_B_PANCREATIC_CELL_DEVELOPMENT		20	0.245099	1.31546	0.136095	0.299276	1	5762	tags=65%, list=41%, signal=109%
GOBP_POSITIVE_REGULATION_OF_HORMONE_SECRETION	GOBP_POSITIVE_REGULATION_OF_HORMONE_SECRETION		168	0.0865876	1.31499	0.145669	0.299551	1	1237	tags=17%, list=9%, signal=19%
GOBP_NEGATIVE_REGULATION_OF_RECEPTOR_SIGNALING_PATHWAY_VIA_STAT	GOBP_NEGATIVE_REGULATION_OF_RECEPTOR_SIGNALING_PATHWAY_VIA_STAT		31	0.19303	1.31294	0.15587	0.301731	1	5976	tags=61%, list=42%, signal=105%
GOBP_NEGATIVE_REGULATION_OF_CELL_CYCLE_PROCESS	GOBP_NEGATIVE_REGULATION_OF_CELL_CYCLE_PROCESS		265	0.0709716	1.31148	0.158416	0.303209	1	10117	tags=78%, list=71%, signal=266%
GOBP_POSITIVE_REGULATION_OF_GLYCOGEN_BIOSYNTHETIC_PROCESS	GOBP_POSITIVE_REGULATION_OF_GLYCOGEN_BIOSYNTHETIC_PROCESS		19	0.253256	1.3112	0.141153	0.303344	1	3887	tags=53%, list=27%, signal=72%
GOBP_SPLEEN_DEVELOPMENT	GOBP_SPLEEN_DEVELOPMENT		43	0.171084	1.3106	0.143158	0.303802	1	7495	tags=70%, list=53%, signal=147%
GOBP_POSITIVE_REGULATION_OF_AMYLOID_BETA_FORMATION	GOBP_POSITIVE_REGULATION_OF_AMYLOID_BETA_FORMATION		18	0.261197	1.31043	0.148454	0.303759	1	7350	tags=78%, list=52%, signal=161%
GOBP_CARTILAGE_DEVELOPMENT	GOBP_CARTILAGE_DEVELOPMENT		204	0.0804279	1.31037	0.150407	0.303582	1	3124	tags=30%, list=22%, signal=38%
GOBP_VASCULAR_ASSOCIATED_SMOOTH_MUSCLE_CELL_DIFFERENTIATION	GOBP_VASCULAR_ASSOCIATED_SMOOTH_MUSCLE_CELL_DIFFERENTIATION		40	0.175189	1.31024	0.161793	0.303468	1	2492	tags=35%, list=18%, signal=42%
GOBP_BONE_MORPHOGENESIS	GOBP_BONE_MORPHOGENESIS		102	0.114364	1.30964	0.132692	0.30393	1	4240	tags=41%, list=30%, signal=58%
GOBP_MONOCYTE_CHEMOTAXIS	GOBP_MONOCYTE_CHEMOTAXIS		40	0.172969	1.30886	0.157676	0.304623	1	2879	tags=38%, list=20%, signal=47%
GOBP_REGULATION_OF_LYSOSOMAL_LUMEN_PH	GOBP_REGULATION_OF_LYSOSOMAL_LUMEN_PH		20	0.244057	1.30852	0.147239	0.304766	1	8621	tags=85%, list=61%, signal=216%
GOBP_PHAGOCYTOSIS	GOBP_PHAGOCYTOSIS		208	0.0800466	1.30829	0.14	0.304791	1	3253	tags=31%, list=23%, signal=39%
GOBP_REGULATION_OF_CARDIAC_MUSCLE_CELL_DIFFERENTIATION	GOBP_REGULATION_OF_CARDIAC_MUSCLE_CELL_DIFFERENTIATION		18	0.253307	1.30627	0.148374	0.306915	1	6672	tags=72%, list=47%, signal=136%
GOBP_POSITIVE_REGULATION_OF_CANONICAL_WNT_SIGNALING_PATHWAY	GOBP_POSITIVE_REGULATION_OF_CANONICAL_WNT_SIGNALING_PATHWAY		103	0.109171	1.30617	0.141975	0.306799	1	7156	tags=61%, list=50%, signal=122%
GOBP_ESTABLISHMENT_OF_SPINDLE_ORIENTATION	GOBP_ESTABLISHMENT_OF_SPINDLE_ORIENTATION		38	0.181886	1.30611	0.152083	0.306625	1	6401	tags=63%, list=45%, signal=115%
GOBP_VENTRICULAR_SEPTUM_MORPHOGENESIS	GOBP_VENTRICULAR_SEPTUM_MORPHOGENESIS		46	0.164251	1.30555	0.15222	0.307066	1	6327	tags=61%, list=44%, signal=109%
GOBP_CYTOKINESIS	GOBP_CYTOKINESIS		152	0.091661	1.3049	0.155894	0.307626	1	10685	tags=84%, list=75%, signal=335%
GOBP_WNT_SIGNALING_PATHWAY_PLANAR_CELL_POLARITY_PATHWAY	GOBP_WNT_SIGNALING_PATHWAY_PLANAR_CELL_POLARITY_PATHWAY		31	0.193805	1.30476	0.165067	0.307567	1	5965	tags=61%, list=42%, signal=105%
GOBP_POSITIVE_REGULATION_OF_ENDOTHELIAL_CELL_PROLIFERATION	GOBP_POSITIVE_REGULATION_OF_ENDOTHELIAL_CELL_PROLIFERATION		89	0.116184	1.30475	0.168651	0.307326	1	8903	tags=74%, list=63%, signal=197%
GOBP_ADULT_LOCOMOTORY_BEHAVIOR	GOBP_ADULT_LOCOMOTORY_BEHAVIOR		95	0.116523	1.30429	0.156126	0.307653	1	3742	tags=38%, list=26%, signal=51%
GOBP_POSITIVE_REGULATION_OF_SYNAPTIC_TRANSMISSION_GABAERGIC	GOBP_POSITIVE_REGULATION_OF_SYNAPTIC_TRANSMISSION_GABAERGIC		18	0.250683	1.30415	0.156436	0.307583	1	2759	tags=44%, list=19%, signal=55%
GOBP_NEGATIVE_REGULATION_OF_CHEMOTAXIS	GOBP_NEGATIVE_REGULATION_OF_CHEMOTAXIS		42	0.174193	1.30319	0.154812	0.308471	1	5994	tags=60%, list=42%, signal=103%
GOBP_POSITIVE_REGULATION_OF_PROTEIN_TYROSINE_KINASE_ACTIVITY	GOBP_POSITIVE_REGULATION_OF_PROTEIN_TYROSINE_KINASE_ACTIVITY		24	0.223539	1.30266	0.165354	0.308847	1	5121	tags=58%, list=36%, signal=91%
GOBP_MULTICELLULAR_ORGANISMAL_LEVEL_IRON_ION_HOMEOSTASIS	GOBP_MULTICELLULAR_ORGANISMAL_LEVEL_IRON_ION_HOMEOSTASIS		31	0.193985	1.30249	0.143141	0.308807	1	3210	tags=42%, list=23%, signal=54%
GOBP_ESTABLISHMENT_OR_MAINTENANCE_OF_MONOPOLAR_CELL_POLARITY	GOBP_ESTABLISHMENT_OR_MAINTENANCE_OF_MONOPOLAR_CELL_POLARITY		20	0.245099	1.30234	0.147059	0.30876	1	5762	tags=65%, list=41%, signal=109%
GOBP_REGULATION_OF_MAMMARY_GLAND_EPITHELIAL_CELL_PROLIFERATION	GOBP_REGULATION_OF_MAMMARY_GLAND_EPITHELIAL_CELL_PROLIFERATION		19	0.242649	1.29981	0.164329	0.311453	1	7780	tags=79%, list=55%, signal=174%
GOBP_POSITIVE_REGULATION_OF_NEURON_APOPTOTIC_PROCESS	GOBP_POSITIVE_REGULATION_OF_NEURON_APOPTOTIC_PROCESS		96	0.113375	1.29855	0.15873	0.312724	1	9804	tags=80%, list=69%, signal=256%
GOBP_REGULATION_OF_MULTICELLULAR_ORGANISM_GROWTH	GOBP_REGULATION_OF_MULTICELLULAR_ORGANISM_GROWTH		76	0.125023	1.29806	0.176113	0.313049	1	6838	tags=61%, list=48%, signal=116%
GOBP_CEREBELLAR_PURKINJE_CELL_LAYER_MORPHOGENESIS	GOBP_CEREBELLAR_PURKINJE_CELL_LAYER_MORPHOGENESIS		20	0.248282	1.29775	0.16129	0.31319	1	8561	tags=85%, list=60%, signal=213%
GOBP_DETECTION_OF_TEMPERATURE_STIMULUS_INVOLVED_IN_SENSORY_PERCEPTION_OF_PAIN	GOBP_DETECTION_OF_TEMPERATURE_STIMULUS_INVOLVED_IN_SENSORY_PERCEPTION_OF_PAIN		20	0.242934	1.29751	0.160321	0.313237	1	9348	tags=90%, list=66%, signal=262%
GOBP_AXO_DENDRITIC_TRANSPORT	GOBP_AXO_DENDRITIC_TRANSPORT		85	0.11886	1.29645	0.150943	0.314325	1	7186	tags=62%, list=51%, signal=125%
GOBP_POSITIVE_REGULATION_OF_NEURON_MIGRATION	GOBP_POSITIVE_REGULATION_OF_NEURON_MIGRATION		21	0.240651	1.29632	0.152466	0.314227	1	8094	tags=81%, list=57%, signal=188%
GOBP_INTERLEUKIN_1_PRODUCTION	GOBP_INTERLEUKIN_1_PRODUCTION		108	0.107067	1.29596	0.142276	0.314377	1	3755	tags=37%, list=26%, signal=50%
GOBP_POSITIVE_REGULATION_OF_CELL_DEVELOPMENT	GOBP_POSITIVE_REGULATION_OF_CELL_DEVELOPMENT		498	0.0512306	1.2958	0.1537	0.314326	1	5664	tags=45%, list=40%, signal=72%
GOBP_CELL_SUBSTRATE_JUNCTION_ORGANIZATION	GOBP_CELL_SUBSTRATE_JUNCTION_ORGANIZATION		101	0.110928	1.29577	0.158513	0.314117	1	6036	tags=53%, list=42%, signal=92%
GOBP_FILOPODIUM_ASSEMBLY	GOBP_FILOPODIUM_ASSEMBLY		65	0.139217	1.29504	0.169847	0.314761	1	4373	tags=45%, list=31%, signal=64%
GOBP_EXTRACELLULAR_MATRIX_ASSEMBLY	GOBP_EXTRACELLULAR_MATRIX_ASSEMBLY		49	0.154628	1.29493	0.157685	0.314651	1	4773	tags=49%, list=34%, signal=73%
GOBP_CARDIAC_MUSCLE_TISSUE_MORPHOGENESIS	GOBP_CARDIAC_MUSCLE_TISSUE_MORPHOGENESIS		66	0.1361	1.29234	0.149712	0.317546	1	5183	tags=50%, list=36%, signal=78%
GOBP_COLUMNAR_CUBOIDAL_EPITHELIAL_CELL_DEVELOPMENT	GOBP_COLUMNAR_CUBOIDAL_EPITHELIAL_CELL_DEVELOPMENT		30	0.201914	1.292	0.182556	0.317706	1	2348	tags=37%, list=17%, signal=44%
GOBP_CHROMOSOME_SEPARATION	GOBP_CHROMOSOME_SEPARATION		76	0.124845	1.29119	0.175197	0.318423	1	10770	tags=88%, list=76%, signal=361%
GOBP_EPITHELIAL_CELL_MATURATION	GOBP_EPITHELIAL_CELL_MATURATION		26	0.206598	1.29084	0.165049	0.318622	1	1989	tags=35%, list=14%, signal=40%
GOBP_DOUBLE_STRAND_BREAK_REPAIR_VIA_NONHOMOLOGOUS_END_JOINING	GOBP_DOUBLE_STRAND_BREAK_REPAIR_VIA_NONHOMOLOGOUS_END_JOINING		59	0.140707	1.29064	0.170172	0.318616	1	10058	tags=85%, list=71%, signal=288%
GOBP_POSITIVE_REGULATION_OF_SYNAPSE_ASSEMBLY	GOBP_POSITIVE_REGULATION_OF_SYNAPSE_ASSEMBLY		65	0.131496	1.29059	0.158111	0.318417	1	5795	tags=54%, list=41%, signal=90%
GOBP_STEM_CELL_PROLIFERATION	GOBP_STEM_CELL_PROLIFERATION		128	0.0974897	1.29057	0.159449	0.318191	1	7291	tags=61%, list=51%, signal=124%
GOBP_REGULATION_OF_RNA_SPLICING	GOBP_REGULATION_OF_RNA_SPLICING		168	0.0850712	1.28988	0.159509	0.318785	1	9046	tags=72%, list=64%, signal=196%
GOBP_REGULATION_OF_STEM_CELL_PROLIFERATION	GOBP_REGULATION_OF_STEM_CELL_PROLIFERATION		94	0.113315	1.28945	0.173489	0.319024	1	6719	tags=59%, list=47%, signal=110%
GOBP_CHONDROCYTE_DIFFERENTIATION_INVOLVED_IN_ENDOCHONDRAL_BONE_MORPHOGENESIS	GOBP_CHONDROCYTE_DIFFERENTIATION_INVOLVED_IN_ENDOCHONDRAL_BONE_MORPHOGENESIS		15	0.273312	1.28905	0.205179	0.319269	1	5597	tags=67%, list=39%, signal=110%
GOBP_POSITIVE_REGULATION_OF_MYOBLAST_PROLIFERATION	GOBP_POSITIVE_REGULATION_OF_MYOBLAST_PROLIFERATION		15	0.273162	1.28799	0.160569	0.320282	1	3703	tags=53%, list=26%, signal=72%
GOBP_REGULATION_OF_RESPIRATORY_GASEOUS_EXCHANGE	GOBP_REGULATION_OF_RESPIRATORY_GASEOUS_EXCHANGE		19	0.244269	1.28783	0.171315	0.320232	1	7757	tags=79%, list=55%, signal=173%
GOBP_REGULATION_OF_AXON_REGENERATION	GOBP_REGULATION_OF_AXON_REGENERATION		32	0.192059	1.28763	0.171815	0.32022	1	6162	tags=63%, list=43%, signal=110%
GOBP_PROSTANOID_METABOLIC_PROCESS	GOBP_PROSTANOID_METABOLIC_PROCESS		63	0.138339	1.28736	0.173196	0.32029	1	2555	tags=32%, list=18%, signal=39%
GOBP_NEGATIVE_REGULATION_OF_LIPID_TRANSPORT	GOBP_NEGATIVE_REGULATION_OF_LIPID_TRANSPORT		34	0.187371	1.28628	0.181633	0.321329	1	4033	tags=47%, list=28%, signal=66%
GOBP_PLACENTA_BLOOD_VESSEL_DEVELOPMENT	GOBP_PLACENTA_BLOOD_VESSEL_DEVELOPMENT		35	0.186649	1.28613	0.164609	0.321256	1	8728	tags=80%, list=61%, signal=207%
GOBP_CONVERGENT_EXTENSION	GOBP_CONVERGENT_EXTENSION		18	0.249998	1.2858	0.169355	0.3214	1	6719	tags=72%, list=47%, signal=137%
GOBP_DOPAMINERGIC_NEURON_DIFFERENTIATION	GOBP_DOPAMINERGIC_NEURON_DIFFERENTIATION		33	0.185846	1.28573	0.168207	0.321238	1	5981	tags=61%, list=42%, signal=104%
GOBP_ENDOPLASMIC_RETICULUM_TUBULAR_NETWORK_ORGANIZATION	GOBP_ENDOPLASMIC_RETICULUM_TUBULAR_NETWORK_ORGANIZATION		20	0.239818	1.28559	0.193613	0.321172	1	5837	tags=65%, list=41%, signal=110%
GOBP_REGULATION_OF_NUCLEOBASE_CONTAINING_COMPOUND_TRANSPORT	GOBP_REGULATION_OF_NUCLEOBASE_CONTAINING_COMPOUND_TRANSPORT		16	0.270539	1.28533	0.174538	0.321232	1	10377	tags=100%, list=73%, signal=370%
GOBP_REGULATION_OF_SIGNALING_RECEPTOR_ACTIVITY	GOBP_REGULATION_OF_SIGNALING_RECEPTOR_ACTIVITY		78	0.121472	1.2853	0.176806	0.321013	1	3386	tags=36%, list=24%, signal=47%
GOBP_REGULATION_OF_NEUROBLAST_PROLIFERATION	GOBP_REGULATION_OF_NEUROBLAST_PROLIFERATION		43	0.169052	1.28526	0.176692	0.320821	1	2563	tags=35%, list=18%, signal=42%
GOBP_DOPAMINE_TRANSPORT	GOBP_DOPAMINE_TRANSPORT		42	0.16572	1.28522	0.178138	0.320615	1	2051	tags=31%, list=14%, signal=36%
GOBP_MESENCHYMAL_CELL_PROLIFERATION	GOBP_MESENCHYMAL_CELL_PROLIFERATION		55	0.146207	1.2839	0.170782	0.321921	1	6719	tags=62%, list=47%, signal=117%
GOBP_P_BODY_ASSEMBLY	GOBP_P_BODY_ASSEMBLY		19	0.244654	1.28201	0.18664	0.323973	1	8500	tags=84%, list=60%, signal=209%
GOBP_EPIDERMIS_MORPHOGENESIS	GOBP_EPIDERMIS_MORPHOGENESIS		41	0.173596	1.28148	0.170018	0.324365	1	10371	tags=90%, list=73%, signal=332%
GOBP_REGULATION_OF_INSULIN_RECEPTOR_SIGNALING_PATHWAY	GOBP_REGULATION_OF_INSULIN_RECEPTOR_SIGNALING_PATHWAY		81	0.120482	1.28064	0.193277	0.325128	1	10234	tags=84%, list=72%, signal=298%
GOBP_NEGATIVE_REGULATION_OF_FIBROBLAST_GROWTH_FACTOR_RECEPTOR_SIGNALING_PATHWAY	GOBP_NEGATIVE_REGULATION_OF_FIBROBLAST_GROWTH_FACTOR_RECEPTOR_SIGNALING_PATHWAY		18	0.247037	1.27984	0.175542	0.325858	1	5971	tags=67%, list=42%, signal=115%
GOBP_LIPOSACCHARIDE_METABOLIC_PROCESS	GOBP_LIPOSACCHARIDE_METABOLIC_PROCESS		90	0.115897	1.27888	0.182377	0.326777	1	8790	tags=73%, list=62%, signal=191%
GOBP_PULMONARY_VALVE_MORPHOGENESIS	GOBP_PULMONARY_VALVE_MORPHOGENESIS		20	0.238603	1.27854	0.179012	0.326938	1	2299	tags=40%, list=16%, signal=48%
GOBP_NEGATIVE_REGULATION_OF_TRANSFORMING_GROWTH_FACTOR_BETA_RECEPTOR_SIGNALING_PATHWAY	GOBP_NEGATIVE_REGULATION_OF_TRANSFORMING_GROWTH_FACTOR_BETA_RECEPTOR_SIGNALING_PATHWAY		95	0.111677	1.27757	0.17418	0.327875	1	8451	tags=71%, list=59%, signal=173%
GOBP_SPERMATID_NUCLEUS_DIFFERENTIATION	GOBP_SPERMATID_NUCLEUS_DIFFERENTIATION		19	0.245321	1.27718	0.164384	0.328118	1	9239	tags=89%, list=65%, signal=255%
GOBP_VESICLE_TARGETING_TO_FROM_OR_WITHIN_GOLGI	GOBP_VESICLE_TARGETING_TO_FROM_OR_WITHIN_GOLGI		23	0.22215	1.276	0.165975	0.32931	1	9211	tags=87%, list=65%, signal=246%
GOBP_NEGATIVE_REGULATION_OF_RECEPTOR_MEDIATED_ENDOCYTOSIS	GOBP_NEGATIVE_REGULATION_OF_RECEPTOR_MEDIATED_ENDOCYTOSIS		30	0.193883	1.2752	0.168627	0.330077	1	2936	tags=40%, list=21%, signal=50%
GOBP_REGULATION_OF_TRIGLYCERIDE_BIOSYNTHETIC_PROCESS	GOBP_REGULATION_OF_TRIGLYCERIDE_BIOSYNTHETIC_PROCESS		24	0.216398	1.27494	0.181996	0.33013	1	7000	tags=71%, list=49%, signal=139%
GOBP_REGULATION_OF_MEMBRANE_PROTEIN_ECTODOMAIN_PROTEOLYSIS	GOBP_REGULATION_OF_MEMBRANE_PROTEIN_ECTODOMAIN_PROTEOLYSIS		25	0.214303	1.27467	0.163561	0.330238	1	3214	tags=44%, list=23%, signal=57%
GOBP_NEGATIVE_REGULATION_OF_G_PROTEIN_COUPLED_RECEPTOR_SIGNALING_PATHWAY	GOBP_NEGATIVE_REGULATION_OF_G_PROTEIN_COUPLED_RECEPTOR_SIGNALING_PATHWAY		58	0.141424	1.27438	0.166667	0.330344	1	3145	tags=36%, list=22%, signal=46%
GOBP_RESPONSE_TO_TRANSFORMING_GROWTH_FACTOR_BETA	GOBP_RESPONSE_TO_TRANSFORMING_GROWTH_FACTOR_BETA		261	0.06942	1.27432	0.178571	0.330153	1	10799	tags=83%, list=76%, signal=338%
GOBP_POSITIVE_REGULATION_OF_MONOCYTE_CHEMOTAXIS	GOBP_POSITIVE_REGULATION_OF_MONOCYTE_CHEMOTAXIS		22	0.2325	1.27402	0.183594	0.330271	1	1869	tags=36%, list=13%, signal=42%
GOBP_POSITIVE_REGULATION_OF_INSULIN_SECRETION_INVOLVED_IN_CELLULAR_RESPONSE_TO_GLUCOSE_STIMULUS	GOBP_POSITIVE_REGULATION_OF_INSULIN_SECRETION_INVOLVED_IN_CELLULAR_RESPONSE_TO_GLUCOSE_STIMULUS		44	0.159551	1.27326	0.16537	0.330969	1	8726	tags=77%, list=61%, signal=199%
GOBP_PROTEIN_K63_LINKED_UBIQUITINATION	GOBP_PROTEIN_K63_LINKED_UBIQUITINATION		68	0.131229	1.27288	0.166	0.331225	1	9644	tags=81%, list=68%, signal=250%
GOBP_NEGATIVE_REGULATION_OF_EXOCYTOSIS	GOBP_NEGATIVE_REGULATION_OF_EXOCYTOSIS		32	0.187295	1.2726	0.173585	0.331324	1	6674	tags=66%, list=47%, signal=123%
GOBP_PHOSPHATIDYLSERINE_METABOLIC_PROCESS	GOBP_PHOSPHATIDYLSERINE_METABOLIC_PROCESS		20	0.242567	1.27252	0.173307	0.331182	1	6509	tags=70%, list=46%, signal=129%
GOBP_NEGATIVE_REGULATION_OF_PEPTIDYL_TYROSINE_PHOSPHORYLATION	GOBP_NEGATIVE_REGULATION_OF_PEPTIDYL_TYROSINE_PHOSPHORYLATION		44	0.158254	1.27167	0.190083	0.331978	1	9714	tags=84%, list=68%, signal=265%
GOBP_POSITIVE_REGULATION_OF_POST_TRANSLATIONAL_PROTEIN_MODIFICATION	GOBP_POSITIVE_REGULATION_OF_POST_TRANSLATIONAL_PROTEIN_MODIFICATION		127	0.096814	1.27103	0.174242	0.332508	1	10504	tags=83%, list=74%, signal=316%
GOBP_NEGATIVE_REGULATION_OF_PEPTIDYL_SERINE_PHOSPHORYLATION	GOBP_NEGATIVE_REGULATION_OF_PEPTIDYL_SERINE_PHOSPHORYLATION		18	0.249454	1.27054	0.186975	0.332891	1	10677	tags=100%, list=75%, signal=401%
GOBP_REGULATION_OF_NEURON_APOPTOTIC_PROCESS	GOBP_REGULATION_OF_NEURON_APOPTOTIC_PROCESS		291	0.0651071	1.27018	0.175781	0.333101	1	3979	tags=34%, list=28%, signal=47%
GOBP_HOMOLOGOUS_RECOMBINATION	GOBP_HOMOLOGOUS_RECOMBINATION		41	0.170634	1.27003	0.175153	0.333057	1	10413	tags=90%, list=73%, signal=336%
GOBP_POSITIVE_REGULATION_OF_CELL_GROWTH	GOBP_POSITIVE_REGULATION_OF_CELL_GROWTH		173	0.0826353	1.26958	0.1875	0.333381	1	8127	tags=65%, list=57%, signal=151%
GOBP_REGULATION_OF_ACUTE_INFLAMMATORY_RESPONSE_TO_ANTIGENIC_STIMULUS	GOBP_REGULATION_OF_ACUTE_INFLAMMATORY_RESPONSE_TO_ANTIGENIC_STIMULUS		16	0.265039	1.2692	0.195171	0.333626	1	1567	tags=38%, list=11%, signal=42%
GOBP_ASSOCIATIVE_LEARNING	GOBP_ASSOCIATIVE_LEARNING		100	0.110057	1.26819	0.172888	0.334649	1	8684	tags=72%, list=61%, signal=184%
GOBP_PEROXISOME_ORGANIZATION	GOBP_PEROXISOME_ORGANIZATION		34	0.180673	1.2672	0.170385	0.33563	1	10402	tags=91%, list=73%, signal=339%
GOBP_POSITIVE_REGULATION_OF_SMOOTH_MUSCLE_CELL_PROLIFERATION	GOBP_POSITIVE_REGULATION_OF_SMOOTH_MUSCLE_CELL_PROLIFERATION		114	0.104944	1.26715	0.187008	0.335439	1	7126	tags=61%, list=50%, signal=120%
GOBP_HYPERSENSITIVITY	GOBP_HYPERSENSITIVITY		16	0.268207	1.26715	0.213147	0.335192	1	1522	tags=38%, list=11%, signal=42%
GOBP_TRIGLYCERIDE_BIOSYNTHETIC_PROCESS	GOBP_TRIGLYCERIDE_BIOSYNTHETIC_PROCESS		42	0.163317	1.26641	0.186312	0.335866	1	7164	tags=67%, list=50%, signal=134%
GOBP_ER_NUCLEUS_SIGNALING_PATHWAY	GOBP_ER_NUCLEUS_SIGNALING_PATHWAY		49	0.151746	1.26613	0.185687	0.335972	1	11489	tags=96%, list=81%, signal=498%
GOBP_POSITIVE_REGULATION_OF_CELL_SIZE	GOBP_POSITIVE_REGULATION_OF_CELL_SIZE		18	0.256194	1.26565	0.188492	0.336374	1	6631	tags=72%, list=47%, signal=135%
GOBP_PHAGOLYSOSOME_ASSEMBLY	GOBP_PHAGOLYSOSOME_ASSEMBLY		16	0.262342	1.26509	0.187755	0.336834	1	7827	tags=81%, list=55%, signal=181%
GOBP_CELL_FATE_SPECIFICATION	GOBP_CELL_FATE_SPECIFICATION		90	0.116593	1.26495	0.198807	0.336752	1	6568	tags=58%, list=46%, signal=107%
GOBP_NEGATIVE_REGULATION_OF_CELL_SUBSTRATE_ADHESION	GOBP_NEGATIVE_REGULATION_OF_CELL_SUBSTRATE_ADHESION		58	0.140978	1.26398	0.16	0.337674	1	10507	tags=88%, list=74%, signal=335%
GOBP_REGULATION_OF_CELLULAR_SENESCENCE	GOBP_REGULATION_OF_CELLULAR_SENESCENCE		48	0.156124	1.26373	0.195817	0.33774	1	8452	tags=75%, list=59%, signal=184%
GOBP_REGULATION_OF_PROTEIN_LOCALIZATION_TO_CELL_SURFACE	GOBP_REGULATION_OF_PROTEIN_LOCALIZATION_TO_CELL_SURFACE		42	0.163772	1.26217	0.180328	0.339406	1	3433	tags=40%, list=24%, signal=53%
GOBP_REGULATION_OF_PEPTIDYL_SERINE_PHOSPHORYLATION	GOBP_REGULATION_OF_PEPTIDYL_SERINE_PHOSPHORYLATION		88	0.113546	1.26173	0.162978	0.339717	1	8252	tags=69%, list=58%, signal=164%
GOBP_PEPTIDE_HORMONE_PROCESSING	GOBP_PEPTIDE_HORMONE_PROCESSING		32	0.18391	1.2615	0.194389	0.339709	1	4500	tags=50%, list=32%, signal=73%
GOBP_CELLULAR_RESPONSE_TO_BIOTIC_STIMULUS	GOBP_CELLULAR_RESPONSE_TO_BIOTIC_STIMULUS		243	0.0703813	1.26052	0.170254	0.340639	1	2351	tags=23%, list=17%, signal=28%
GOBP_LAMELLIPODIUM_MORPHOGENESIS	GOBP_LAMELLIPODIUM_MORPHOGENESIS		16	0.263582	1.2605	0.197938	0.34042	1	9587	tags=94%, list=67%, signal=287%
GOBP_EMBRYONIC_CAMERA_TYPE_EYE_DEVELOPMENT	GOBP_EMBRYONIC_CAMERA_TYPE_EYE_DEVELOPMENT		41	0.165387	1.26034	0.183908	0.340369	1	6672	tags=63%, list=47%, signal=119%
GOBP_MUSCLE_TISSUE_DEVELOPMENT	GOBP_MUSCLE_TISSUE_DEVELOPMENT		453	0.0508098	1.26013	0.174797	0.340394	1	4856	tags=39%, list=34%, signal=57%
GOBP_NEURONAL_STEM_CELL_POPULATION_MAINTENANCE	GOBP_NEURONAL_STEM_CELL_POPULATION_MAINTENANCE		27	0.202957	1.25818	0.192233	0.342557	1	8179	tags=78%, list=58%, signal=183%
GOBP_REGULATION_OF_ERYTHROCYTE_DIFFERENTIATION	GOBP_REGULATION_OF_ERYTHROCYTE_DIFFERENTIATION		47	0.154304	1.25812	0.195171	0.342388	1	8402	tags=74%, list=59%, signal=181%
GOBP_CYTOPLASMIC_PATTERN_RECOGNITION_RECEPTOR_SIGNALING_PATHWAY	GOBP_CYTOPLASMIC_PATTERN_RECOGNITION_RECEPTOR_SIGNALING_PATHWAY		164	0.0848713	1.25788	0.187747	0.342443	1	9385	tags=74%, list=66%, signal=216%
GOBP_NEGATIVE_REGULATION_OF_GENE_EXPRESSION_VIA_CHROMOSOMAL_CPG_ISLAND_METHYLATION	GOBP_NEGATIVE_REGULATION_OF_GENE_EXPRESSION_VIA_CHROMOSOMAL_CPG_ISLAND_METHYLATION		19	0.241163	1.2577	0.206186	0.342408	1	10795	tags=100%, list=76%, signal=415%
GOBP_LOCOMOTORY_EXPLORATION_BEHAVIOR	GOBP_LOCOMOTORY_EXPLORATION_BEHAVIOR		20	0.232096	1.25746	0.195021	0.342433	1	10924	tags=100%, list=77%, signal=431%
GOBP_PERIPHERAL_NERVOUS_SYSTEM_AXON_ENSHEATHMENT	GOBP_PERIPHERAL_NERVOUS_SYSTEM_AXON_ENSHEATHMENT		30	0.199251	1.25712	0.187377	0.342595	1	5230	tags=57%, list=37%, signal=89%
GOBP_REGULATION_OF_CELLULAR_RESPONSE_TO_VASCULAR_ENDOTHELIAL_GROWTH_FACTOR_STIMULUS	GOBP_REGULATION_OF_CELLULAR_RESPONSE_TO_VASCULAR_ENDOTHELIAL_GROWTH_FACTOR_STIMULUS		27	0.198665	1.25665	0.226415	0.342928	1	4553	tags=52%, list=32%, signal=76%
GOBP_POSITIVE_REGULATION_OF_INTERLEUKIN_1_PRODUCTION	GOBP_POSITIVE_REGULATION_OF_INTERLEUKIN_1_PRODUCTION		63	0.134002	1.25656	0.187123	0.342779	1	7131	tags=63%, list=50%, signal=127%
GOBP_NEGATIVE_REGULATION_OF_GTPASE_ACTIVITY	GOBP_NEGATIVE_REGULATION_OF_GTPASE_ACTIVITY		21	0.23227	1.25619	0.174	0.343011	1	8213	tags=81%, list=58%, signal=191%
GOBP_NEGATIVE_REGULATION_OF_ENDOCYTOSIS	GOBP_NEGATIVE_REGULATION_OF_ENDOCYTOSIS		68	0.128715	1.25602	0.183071	0.342968	1	4033	tags=41%, list=28%, signal=57%
GOBP_EXTRINSIC_APOPTOTIC_SIGNALING_PATHWAY	GOBP_EXTRINSIC_APOPTOTIC_SIGNALING_PATHWAY		229	0.0712809	1.25543	0.19	0.343482	1	7882	tags=62%, list=55%, signal=138%
GOBP_REGULATION_OF_DENDRITE_MORPHOGENESIS	GOBP_REGULATION_OF_DENDRITE_MORPHOGENESIS		88	0.117973	1.25506	0.210736	0.343728	1	6735	tags=59%, list=47%, signal=112%
GOBP_PROTEIN_STABILIZATION	GOBP_PROTEIN_STABILIZATION		190	0.0794797	1.25359	0.191406	0.345313	1	5171	tags=44%, list=36%, signal=69%
GOBP_NEUROTRANSMITTER_RECEPTOR_TRANSPORT	GOBP_NEUROTRANSMITTER_RECEPTOR_TRANSPORT		26	0.206506	1.25311	0.186916	0.345633	1	6366	tags=65%, list=45%, signal=118%
GOBP_BONE_GROWTH	GOBP_BONE_GROWTH		31	0.186406	1.25305	0.171598	0.345476	1	6070	tags=61%, list=43%, signal=107%
GOBP_VISUAL_BEHAVIOR	GOBP_VISUAL_BEHAVIOR		67	0.130206	1.2522	0.179435	0.346352	1	8981	tags=76%, list=63%, signal=206%
GOBP_RESPONSE_TO_INTERLEUKIN_1	GOBP_RESPONSE_TO_INTERLEUKIN_1		100	0.106089	1.25176	0.181102	0.346661	1	2625	tags=29%, list=18%, signal=35%
GOBP_NEPHRIC_DUCT_DEVELOPMENT	GOBP_NEPHRIC_DUCT_DEVELOPMENT		15	0.267601	1.25164	0.199605	0.34655	1	3782	tags=53%, list=27%, signal=73%
GOBP_PROTEIN_CATABOLIC_PROCESS_IN_THE_VACUOLE	GOBP_PROTEIN_CATABOLIC_PROCESS_IN_THE_VACUOLE		21	0.231214	1.25133	0.191358	0.346686	1	8228	tags=81%, list=58%, signal=192%
GOBP_REGULATION_OF_DNA_TEMPLATED_TRANSCRIPTION_INITIATION	GOBP_REGULATION_OF_DNA_TEMPLATED_TRANSCRIPTION_INITIATION		84	0.115021	1.25128	0.16996	0.346493	1	9208	tags=76%, list=65%, signal=215%
GOBP_REGULATION_OF_CENTRIOLE_REPLICATION	GOBP_REGULATION_OF_CENTRIOLE_REPLICATION		22	0.220096	1.25077	0.182331	0.346881	1	6570	tags=68%, list=46%, signal=127%
GOBP_POSITIVE_REGULATION_OF_PROTEASOMAL_UBIQUITIN_DEPENDENT_PROTEIN_CATABOLIC_PROCESS	GOBP_POSITIVE_REGULATION_OF_PROTEASOMAL_UBIQUITIN_DEPENDENT_PROTEIN_CATABOLIC_PROCESS		72	0.124276	1.25037	0.182573	0.347116	1	10684	tags=88%, list=75%, signal=350%
GOBP_REGULATION_OF_VIRAL_LIFE_CYCLE	GOBP_REGULATION_OF_VIRAL_LIFE_CYCLE		110	0.102701	1.25017	0.187234	0.347126	1	5531	tags=49%, list=39%, signal=80%
GOBP_NEGATIVE_REGULATION_OF_HOMOTYPIC_CELL_CELL_ADHESION	GOBP_NEGATIVE_REGULATION_OF_HOMOTYPIC_CELL_CELL_ADHESION		15	0.26471	1.24952	0.224371	0.347673	1	2875	tags=47%, list=20%, signal=58%
GOBP_INTERLEUKIN_1_BETA_PRODUCTION	GOBP_INTERLEUKIN_1_BETA_PRODUCTION		90	0.114385	1.24811	0.19697	0.349211	1	3755	tags=38%, list=26%, signal=51%
GOBP_REGULATION_OF_BINDING	GOBP_REGULATION_OF_BINDING		294	0.0641164	1.24771	0.199203	0.349492	1	6797	tags=54%, list=48%, signal=101%
GOBP_GLIAL_CELL_PROLIFERATION	GOBP_GLIAL_CELL_PROLIFERATION		76	0.12313	1.24748	0.185484	0.349572	1	4058	tags=41%, list=29%, signal=57%
GOBP_MECHANOSENSORY_BEHAVIOR	GOBP_MECHANOSENSORY_BEHAVIOR		15	0.267112	1.24743	0.178645	0.349388	1	4737	tags=60%, list=33%, signal=90%
GOBP_REGULATION_OF_TRANSCRIPTION_BY_RNA_POLYMERASE_III	GOBP_REGULATION_OF_TRANSCRIPTION_BY_RNA_POLYMERASE_III		24	0.21162	1.24691	0.189349	0.349786	1	9438	tags=88%, list=66%, signal=260%
GOBP_METANEPHRIC_NEPHRON_MORPHOGENESIS	GOBP_METANEPHRIC_NEPHRON_MORPHOGENESIS		25	0.208786	1.24672	0.192547	0.349764	1	4430	tags=52%, list=31%, signal=75%
GOBP_RESPONSE_TO_ELECTRICAL_STIMULUS	GOBP_RESPONSE_TO_ELECTRICAL_STIMULUS		44	0.157927	1.24663	0.194672	0.349626	1	7133	tags=66%, list=50%, signal=132%
GOBP_REGULATION_OF_MICROTUBULE_POLYMERIZATION	GOBP_REGULATION_OF_MICROTUBULE_POLYMERIZATION		53	0.140806	1.24656	0.181641	0.349482	1	6322	tags=58%, list=44%, signal=105%
GOBP_TRANSCRIPTION_BY_RNA_POLYMERASE_I	GOBP_TRANSCRIPTION_BY_RNA_POLYMERASE_I		67	0.131852	1.2458	0.190855	0.350181	1	11717	tags=96%, list=82%, signal=540%
GOBP_AORTA_MORPHOGENESIS	GOBP_AORTA_MORPHOGENESIS		34	0.180575	1.24566	0.18146	0.350099	1	6639	tags=65%, list=47%, signal=121%
GOBP_FOCAL_ADHESION_ASSEMBLY	GOBP_FOCAL_ADHESION_ASSEMBLY		83	0.118346	1.24551	0.187755	0.350032	1	6036	tags=54%, list=42%, signal=94%
GOBP_PHAGOSOME_MATURATION	GOBP_PHAGOSOME_MATURATION		29	0.195222	1.24503	0.203219	0.350387	1	7036	tags=69%, list=49%, signal=136%
GOBP_REGULATION_OF_CELL_CYCLE_G1_S_PHASE_TRANSITION	GOBP_REGULATION_OF_CELL_CYCLE_G1_S_PHASE_TRANSITION		171	0.0808666	1.24489	0.2	0.350327	1	8094	tags=65%, list=57%, signal=149%
GOBP_GLYCOSYLCERAMIDE_METABOLIC_PROCESS	GOBP_GLYCOSYLCERAMIDE_METABOLIC_PROCESS		15	0.269149	1.24476	0.20122	0.350228	1	3760	tags=53%, list=26%, signal=72%
GOBP_MOTOR_BEHAVIOR	GOBP_MOTOR_BEHAVIOR		33	0.180436	1.24332	0.209346	0.351783	1	4334	tags=48%, list=30%, signal=70%
GOBP_REGULATION_OF_CHOLESTEROL_EFFLUX	GOBP_REGULATION_OF_CHOLESTEROL_EFFLUX		40	0.166804	1.24324	0.189024	0.351624	1	4033	tags=45%, list=28%, signal=63%
GOBP_REGULATION_OF_PEPTIDASE_ACTIVITY	GOBP_REGULATION_OF_PEPTIDASE_ACTIVITY		70	0.126082	1.24243	0.192913	0.352451	1	4919	tags=47%, list=35%, signal=72%
GOBP_RESPONSE_TO_ISCHEMIA	GOBP_RESPONSE_TO_ISCHEMIA		58	0.135913	1.24204	0.196911	0.352675	1	4449	tags=45%, list=31%, signal=65%
GOBP_NEGATIVE_REGULATION_OF_RESPONSE_TO_EXTERNAL_STIMULUS	GOBP_NEGATIVE_REGULATION_OF_RESPONSE_TO_EXTERNAL_STIMULUS		361	0.0573671	1.24187	0.183953	0.352652	1	2119	tags=20%, list=15%, signal=23%
GOBP_OLIGODENDROCYTE_DIFFERENTIATION	GOBP_OLIGODENDROCYTE_DIFFERENTIATION		114	0.0981365	1.24134	0.207343	0.353046	1	8220	tags=68%, list=58%, signal=159%
GOBP_POSITIVE_REGULATION_OF_SMOOTH_MUSCLE_CELL_DIFFERENTIATION	GOBP_POSITIVE_REGULATION_OF_SMOOTH_MUSCLE_CELL_DIFFERENTIATION		17	0.251951	1.24107	0.195857	0.353153	1	2276	tags=41%, list=16%, signal=49%
GOBP_POSITIVE_REGULATION_OF_EPIDERMAL_CELL_DIFFERENTIATION	GOBP_POSITIVE_REGULATION_OF_EPIDERMAL_CELL_DIFFERENTIATION		20	0.231864	1.24086	0.200828	0.35315	1	6661	tags=70%, list=47%, signal=131%
GOBP_NEGATIVE_REGULATION_OF_MITOTIC_CELL_CYCLE_PHASE_TRANSITION	GOBP_NEGATIVE_REGULATION_OF_MITOTIC_CELL_CYCLE_PHASE_TRANSITION		155	0.084747	1.24068	0.206107	0.353145	1	10092	tags=79%, list=71%, signal=270%
GOBP_VESICLE_COATING	GOBP_VESICLE_COATING		28	0.194945	1.24028	0.181637	0.353406	1	7390	tags=71%, list=52%, signal=148%
GOBP_DENDRITIC_SPINE_MORPHOGENESIS	GOBP_DENDRITIC_SPINE_MORPHOGENESIS		75	0.121246	1.24023	0.204545	0.353223	1	6058	tags=55%, list=43%, signal=95%
GOBP_REGULATION_OF_CELLULAR_RESPONSE_TO_TRANSFORMING_GROWTH_FACTOR_BETA_STIMULUS	GOBP_REGULATION_OF_CELLULAR_RESPONSE_TO_TRANSFORMING_GROWTH_FACTOR_BETA_STIMULUS		139	0.0900006	1.24	0.193159	0.353291	1	8451	tags=68%, list=59%, signal=167%
GOBP_MOTOR_NEURON_AXON_GUIDANCE	GOBP_MOTOR_NEURON_AXON_GUIDANCE		30	0.194943	1.23971	0.197605	0.353393	1	3395	tags=43%, list=24%, signal=57%
GOBP_BLASTODERM_SEGMENTATION	GOBP_BLASTODERM_SEGMENTATION		25	0.211136	1.23951	0.218437	0.353388	1	6672	tags=68%, list=47%, signal=128%
GOBP_MORPHOGENESIS_OF_AN_ENDOTHELIUM	GOBP_MORPHOGENESIS_OF_AN_ENDOTHELIUM		19	0.243335	1.23886	0.190114	0.353995	1	1034	tags=32%, list=7%, signal=34%
GOBP_DETECTION_OF_STIMULUS_INVOLVED_IN_SENSORY_PERCEPTION_OF_PAIN	GOBP_DETECTION_OF_STIMULUS_INVOLVED_IN_SENSORY_PERCEPTION_OF_PAIN		30	0.190374	1.23846	0.201646	0.354252	1	5830	tags=60%, list=41%, signal=101%
GOBP_POSTSYNAPSE_TO_NUCLEUS_SIGNALING_PATHWAY	GOBP_POSTSYNAPSE_TO_NUCLEUS_SIGNALING_PATHWAY		15	0.262058	1.23749	0.19596	0.355276	1	7653	tags=80%, list=54%, signal=173%
GOBP_POSITIVE_REGULATION_OF_STEROL_TRANSPORT	GOBP_POSITIVE_REGULATION_OF_STEROL_TRANSPORT		40	0.166237	1.23661	0.179641	0.356196	1	3330	tags=40%, list=23%, signal=52%
GOBP_NEGATIVE_REGULATION_OF_RESPONSE_TO_WOUNDING	GOBP_NEGATIVE_REGULATION_OF_RESPONSE_TO_WOUNDING		88	0.112987	1.23588	0.22	0.356912	1	2119	tags=26%, list=15%, signal=31%
GOBP_HEMOSTASIS	GOBP_HEMOSTASIS		186	0.0793642	1.23582	0.21135	0.356727	1	3549	tags=33%, list=25%, signal=43%
GOBP_STEROID_HORMONE_RECEPTOR_SIGNALING_PATHWAY	GOBP_STEROID_HORMONE_RECEPTOR_SIGNALING_PATHWAY		109	0.100942	1.2357	0.198364	0.35663	1	8751	tags=72%, list=62%, signal=185%
GOBP_SNRNA_METABOLIC_PROCESS	GOBP_SNRNA_METABOLIC_PROCESS		46	0.153212	1.23533	0.215139	0.356846	1	9575	tags=83%, list=67%, signal=252%
GOBP_NEGATIVE_REGULATION_OF_TELOMERE_MAINTENANCE_VIA_TELOMERE_LENGTHENING	GOBP_NEGATIVE_REGULATION_OF_TELOMERE_MAINTENANCE_VIA_TELOMERE_LENGTHENING		23	0.212424	1.23415	0.206122	0.358142	1	11204	tags=100%, list=79%, signal=471%
GOBP_POSITIVE_REGULATION_OF_EPITHELIAL_TO_MESENCHYMAL_TRANSITION	GOBP_POSITIVE_REGULATION_OF_EPITHELIAL_TO_MESENCHYMAL_TRANSITION		54	0.142737	1.23409	0.200803	0.357955	1	4824	tags=48%, list=34%, signal=73%
GOBP_NEGATIVE_REGULATION_OF_MITOTIC_CELL_CYCLE	GOBP_NEGATIVE_REGULATION_OF_MITOTIC_CELL_CYCLE		204	0.0739295	1.23372	0.181452	0.35818	1	7816	tags=62%, list=55%, signal=136%
GOBP_HEPARAN_SULFATE_PROTEOGLYCAN_BIOSYNTHETIC_PROCESS	GOBP_HEPARAN_SULFATE_PROTEOGLYCAN_BIOSYNTHETIC_PROCESS		29	0.188202	1.23364	0.211462	0.358027	1	7626	tags=72%, list=54%, signal=156%
GOBP_NEGATIVE_REGULATION_OF_CYTOPLASMIC_PATTERN_RECOGNITION_RECEPTOR_SIGNALING_PATHWAY	GOBP_NEGATIVE_REGULATION_OF_CYTOPLASMIC_PATTERN_RECOGNITION_RECEPTOR_SIGNALING_PATHWAY		51	0.146774	1.23297	0.2079	0.358629	1	10746	tags=90%, list=76%, signal=368%
GOBP_POSITIVE_REGULATION_OF_DENDRITIC_SPINE_DEVELOPMENT	GOBP_POSITIVE_REGULATION_OF_DENDRITIC_SPINE_DEVELOPMENT		67	0.130024	1.23288	0.22	0.358489	1	4314	tags=43%, list=30%, signal=62%
GOBP_PROTEIN_KINASE_A_SIGNALING	GOBP_PROTEIN_KINASE_A_SIGNALING		25	0.208245	1.23111	0.203156	0.360582	1	3300	tags=44%, list=23%, signal=57%
GOBP_DNA_SYNTHESIS_INVOLVED_IN_DNA_REPAIR	GOBP_DNA_SYNTHESIS_INVOLVED_IN_DNA_REPAIR		29	0.189665	1.22996	0.188605	0.3618	1	8586	tags=79%, list=60%, signal=200%
GOBP_ENDOPLASMIC_RETICULUM_CALCIUM_ION_HOMEOSTASIS	GOBP_ENDOPLASMIC_RETICULUM_CALCIUM_ION_HOMEOSTASIS		25	0.205607	1.2296	0.199195	0.361998	1	8457	tags=80%, list=59%, signal=197%
GOBP_PROSTATE_GLAND_MORPHOGENESIS	GOBP_PROSTATE_GLAND_MORPHOGENESIS		31	0.184835	1.22926	0.214829	0.36219	1	8386	tags=77%, list=59%, signal=188%
GOBP_PLATELET_ACTIVATION	GOBP_PLATELET_ACTIVATION		99	0.104633	1.22788	0.185484	0.363696	1	3549	tags=35%, list=25%, signal=47%
GOBP_POSITIVE_REGULATION_OF_LAMELLIPODIUM_ORGANIZATION	GOBP_POSITIVE_REGULATION_OF_LAMELLIPODIUM_ORGANIZATION		33	0.181436	1.2278	0.205645	0.363538	1	3027	tags=39%, list=21%, signal=50%
GOBP_REGULATION_OF_ARP2_3_COMPLEX_MEDIATED_ACTIN_NUCLEATION	GOBP_REGULATION_OF_ARP2_3_COMPLEX_MEDIATED_ACTIN_NUCLEATION		18	0.242523	1.22736	0.202381	0.363855	1	4455	tags=56%, list=31%, signal=81%
GOBP_CELLULAR_RESPONSE_TO_GLUCOSE_STARVATION	GOBP_CELLULAR_RESPONSE_TO_GLUCOSE_STARVATION		50	0.146623	1.22569	0.193424	0.365752	1	9298	tags=80%, list=65%, signal=230%
GOBP_NEGATIVE_REGULATION_OF_ERK1_AND_ERK2_CASCADE	GOBP_NEGATIVE_REGULATION_OF_ERK1_AND_ERK2_CASCADE		71	0.121389	1.22556	0.19883	0.365683	1	5492	tags=51%, list=39%, signal=82%
GOBP_NEGATIVE_REGULATION_OF_CARDIAC_MUSCLE_CELL_PROLIFERATION	GOBP_NEGATIVE_REGULATION_OF_CARDIAC_MUSCLE_CELL_PROLIFERATION		16	0.255341	1.22457	0.205479	0.366762	1	5260	tags=63%, list=37%, signal=99%
GOBP_POSITIVE_REGULATION_OF_VASCULAR_ENDOTHELIAL_CELL_PROLIFERATION	GOBP_POSITIVE_REGULATION_OF_VASCULAR_ENDOTHELIAL_CELL_PROLIFERATION		19	0.232614	1.22407	0.19697	0.367193	1	8671	tags=84%, list=61%, signal=215%
GOBP_SECONDARY_PALATE_DEVELOPMENT	GOBP_SECONDARY_PALATE_DEVELOPMENT		24	0.209252	1.22348	0.209581	0.367722	1	7694	tags=75%, list=54%, signal=163%
GOBP_PROTEIN_EXIT_FROM_ENDOPLASMIC_RETICULUM	GOBP_PROTEIN_EXIT_FROM_ENDOPLASMIC_RETICULUM		39	0.164817	1.22337	0.216599	0.367618	1	10424	tags=90%, list=73%, signal=335%
GOBP_NEGATIVE_REGULATION_OF_CATABOLIC_PROCESS	GOBP_NEGATIVE_REGULATION_OF_CATABOLIC_PROCESS		327	0.0584507	1.22308	0.2158	0.367725	1	8885	tags=68%, list=62%, signal=178%
GOBP_NEGATIVE_REGULATION_OF_ACTIVIN_RECEPTOR_SIGNALING_PATHWAY	GOBP_NEGATIVE_REGULATION_OF_ACTIVIN_RECEPTOR_SIGNALING_PATHWAY		15	0.256441	1.22306	0.203629	0.367486	1	10577	tags=100%, list=74%, signal=390%
GOBP_PEPTIDYL_GLUTAMIC_ACID_MODIFICATION	GOBP_PEPTIDYL_GLUTAMIC_ACID_MODIFICATION		18	0.239722	1.2222	0.214145	0.368317	1	7655	tags=78%, list=54%, signal=168%
GOBP_LIPID_LOCALIZATION	GOBP_LIPID_LOCALIZATION		417	0.0515697	1.22202	0.215534	0.368313	1	2220	tags=21%, list=16%, signal=24%
GOBP_REGULATION_OF_RHO_PROTEIN_SIGNAL_TRANSDUCTION	GOBP_REGULATION_OF_RHO_PROTEIN_SIGNAL_TRANSDUCTION		80	0.114131	1.22193	0.220755	0.368168	1	4429	tags=43%, list=31%, signal=61%
GOBP_OVULATION	GOBP_OVULATION		21	0.217824	1.22167	0.220339	0.368248	1	4355	tags=52%, list=31%, signal=75%
GOBP_POSITIVE_REGULATION_OF_DNA_TEMPLATED_TRANSCRIPTION_INITIATION	GOBP_POSITIVE_REGULATION_OF_DNA_TEMPLATED_TRANSCRIPTION_INITIATION		73	0.122893	1.22132	0.189293	0.368465	1	9754	tags=81%, list=69%, signal=256%
GOBP_NEGATIVE_REGULATION_OF_DENDRITIC_SPINE_DEVELOPMENT	GOBP_NEGATIVE_REGULATION_OF_DENDRITIC_SPINE_DEVELOPMENT		16	0.255935	1.21914	0.218147	0.371052	1	7918	tags=81%, list=56%, signal=183%
GOBP_POSITIVE_REGULATION_OF_ERBB_SIGNALING_PATHWAY	GOBP_POSITIVE_REGULATION_OF_ERBB_SIGNALING_PATHWAY		28	0.193315	1.21911	0.214286	0.370839	1	3350	tags=43%, list=24%, signal=56%
GOBP_NEGATIVE_REGULATION_OF_FATTY_ACID_BIOSYNTHETIC_PROCESS	GOBP_NEGATIVE_REGULATION_OF_FATTY_ACID_BIOSYNTHETIC_PROCESS		19	0.228426	1.21713	0.219802	0.373206	1	7982	tags=79%, list=56%, signal=180%
GOBP_EXCITATORY_SYNAPSE_ASSEMBLY	GOBP_EXCITATORY_SYNAPSE_ASSEMBLY		37	0.169552	1.21531	0.236328	0.375374	1	2975	tags=38%, list=21%, signal=48%
GOBP_REGULATION_OF_CLATHRIN_DEPENDENT_ENDOCYTOSIS	GOBP_REGULATION_OF_CLATHRIN_DEPENDENT_ENDOCYTOSIS		19	0.231854	1.21513	0.188	0.375359	1	2694	tags=42%, list=19%, signal=52%
GOBP_GLUCAN_BIOSYNTHETIC_PROCESS	GOBP_GLUCAN_BIOSYNTHETIC_PROCESS		44	0.155526	1.21395	0.237624	0.376727	1	3935	tags=43%, list=28%, signal=60%
GOBP_LYSOSOMAL_LUMEN_ACIDIFICATION	GOBP_LYSOSOMAL_LUMEN_ACIDIFICATION		15	0.260655	1.21365	0.22869	0.376873	1	8621	tags=87%, list=61%, signal=220%
GOBP_REGULATION_OF_EXECUTION_PHASE_OF_APOPTOSIS	GOBP_REGULATION_OF_EXECUTION_PHASE_OF_APOPTOSIS		24	0.208612	1.21344	0.220472	0.376862	1	6518	tags=67%, list=46%, signal=123%
GOBP_POSITIVE_REGULATION_OF_GROWTH	GOBP_POSITIVE_REGULATION_OF_GROWTH		271	0.0643638	1.21339	0.215238	0.376672	1	8127	tags=63%, list=57%, signal=145%
GOBP_REGULATION_OF_TRANSMISSION_OF_NERVE_IMPULSE	GOBP_REGULATION_OF_TRANSMISSION_OF_NERVE_IMPULSE		18	0.239007	1.21248	0.210019	0.377614	1	5295	tags=61%, list=37%, signal=97%
GOBP_REGULATION_OF_LONG_TERM_NEURONAL_SYNAPTIC_PLASTICITY	GOBP_REGULATION_OF_LONG_TERM_NEURONAL_SYNAPTIC_PLASTICITY		31	0.179097	1.21219	0.205645	0.377763	1	3880	tags=45%, list=27%, signal=62%
GOBP_VIRAL_PROCESS	GOBP_VIRAL_PROCESS		292	0.0605707	1.21178	0.228	0.378077	1	8360	tags=65%, list=59%, signal=154%
GOBP_CARTILAGE_DEVELOPMENT_INVOLVED_IN_ENDOCHONDRAL_BONE_MORPHOGENESIS	GOBP_CARTILAGE_DEVELOPMENT_INVOLVED_IN_ENDOCHONDRAL_BONE_MORPHOGENESIS		35	0.173523	1.2111	0.212058	0.37868	1	6070	tags=60%, list=43%, signal=104%
GOBP_VENTRICULAR_CARDIAC_MUSCLE_TISSUE_DEVELOPMENT	GOBP_VENTRICULAR_CARDIAC_MUSCLE_TISSUE_DEVELOPMENT		65	0.126683	1.21033	0.245243	0.379449	1	4988	tags=48%, list=35%, signal=73%
GOBP_NUCLEAR_RECEPTOR_MEDIATED_SIGNALING_PATHWAY	GOBP_NUCLEAR_RECEPTOR_MEDIATED_SIGNALING_PATHWAY		167	0.0801238	1.20969	0.209393	0.380058	1	8751	tags=69%, list=62%, signal=178%
GOBP_REGULATION_OF_CHEMOTAXIS	GOBP_REGULATION_OF_CHEMOTAXIS		205	0.0719401	1.20962	0.219512	0.379885	1	2043	tags=21%, list=14%, signal=25%
GOBP_SOMITOGENESIS	GOBP_SOMITOGENESIS		65	0.129298	1.20922	0.232365	0.380139	1	1888	tags=26%, list=13%, signal=30%
GOBP_ORGANIC_CATION_TRANSPORT	GOBP_ORGANIC_CATION_TRANSPORT		115	0.095069	1.20756	0.19958	0.382071	1	4841	tags=43%, list=34%, signal=65%
GOBP_REGULATION_OF_CIRCADIAN_RHYTHM	GOBP_REGULATION_OF_CIRCADIAN_RHYTHM		103	0.0993306	1.20731	0.224066	0.382148	1	7433	tags=62%, list=52%, signal=129%
GOBP_AORTIC_VALVE_MORPHOGENESIS	GOBP_AORTIC_VALVE_MORPHOGENESIS		30	0.186971	1.20667	0.241779	0.382775	1	1612	tags=30%, list=11%, signal=34%
GOBP_NEGATIVE_REGULATION_OF_MONONUCLEAR_CELL_MIGRATION	GOBP_NEGATIVE_REGULATION_OF_MONONUCLEAR_CELL_MIGRATION		26	0.200458	1.20591	0.217742	0.383561	1	4264	tags=50%, list=30%, signal=71%
GOBP_RESPONSE_TO_INCREASED_OXYGEN_LEVELS	GOBP_RESPONSE_TO_INCREASED_OXYGEN_LEVELS		23	0.209959	1.2053	0.222904	0.384163	1	11239	tags=100%, list=79%, signal=476%
GOBP_PROGRAMMED_NECROTIC_CELL_DEATH	GOBP_PROGRAMMED_NECROTIC_CELL_DEATH		51	0.144136	1.20425	0.248577	0.385328	1	9668	tags=82%, list=68%, signal=256%
GOBP_NEUROTRANSMITTER_RECEPTOR_INTERNALIZATION	GOBP_NEUROTRANSMITTER_RECEPTOR_INTERNALIZATION		49	0.143481	1.20374	0.23374	0.385744	1	7543	tags=67%, list=53%, signal=143%
GOBP_REGULATION_OF_MONONUCLEAR_CELL_MIGRATION	GOBP_REGULATION_OF_MONONUCLEAR_CELL_MIGRATION		133	0.0877567	1.20299	0.217647	0.386471	1	4002	tags=37%, list=28%, signal=51%
GOBP_REGULATION_OF_POLYSACCHARIDE_BIOSYNTHETIC_PROCESS	GOBP_REGULATION_OF_POLYSACCHARIDE_BIOSYNTHETIC_PROCESS		42	0.155633	1.20205	0.230303	0.387431	1	3887	tags=43%, list=27%, signal=59%
GOBP_POSITIVE_REGULATION_OF_SPROUTING_ANGIOGENESIS	GOBP_POSITIVE_REGULATION_OF_SPROUTING_ANGIOGENESIS		24	0.207203	1.202	0.248016	0.38722	1	6538	tags=67%, list=46%, signal=123%
GOBP_PURINERGIC_NUCLEOTIDE_RECEPTOR_SIGNALING_PATHWAY	GOBP_PURINERGIC_NUCLEOTIDE_RECEPTOR_SIGNALING_PATHWAY		24	0.207958	1.20178	0.22	0.387257	1	9490	tags=88%, list=67%, signal=263%
GOBP_CELLULAR_RESPONSE_TO_UV	GOBP_CELLULAR_RESPONSE_TO_UV		85	0.113011	1.20053	0.248577	0.388678	1	7436	tags=64%, list=52%, signal=132%
GOBP_NEGATIVE_REGULATION_OF_CELL_MATRIX_ADHESION	GOBP_NEGATIVE_REGULATION_OF_CELL_MATRIX_ADHESION		34	0.173272	1.20019	0.247444	0.388869	1	10507	tags=91%, list=74%, signal=348%
GOBP_POSITIVE_REGULATION_OF_MIRNA_METABOLIC_PROCESS	GOBP_POSITIVE_REGULATION_OF_MIRNA_METABOLIC_PROCESS		57	0.137941	1.19959	0.239006	0.389438	1	4033	tags=42%, list=28%, signal=59%
GOBP_SENSORY_PERCEPTION_OF_TEMPERATURE_STIMULUS	GOBP_SENSORY_PERCEPTION_OF_TEMPERATURE_STIMULUS		28	0.18794	1.19949	0.224066	0.389324	1	9521	tags=86%, list=67%, signal=259%
GOBP_MITOTIC_DNA_INTEGRITY_CHECKPOINT_SIGNALING	GOBP_MITOTIC_DNA_INTEGRITY_CHECKPOINT_SIGNALING		67	0.125048	1.19925	0.230143	0.389413	1	8205	tags=70%, list=58%, signal=165%
GOBP_PHOSPHATIDYLCHOLINE_BIOSYNTHETIC_PROCESS	GOBP_PHOSPHATIDYLCHOLINE_BIOSYNTHETIC_PROCESS		20	0.226424	1.19898	0.235887	0.389543	1	3183	tags=45%, list=22%, signal=58%
GOBP_REGULATION_OF_POSTSYNAPSE_ASSEMBLY	GOBP_REGULATION_OF_POSTSYNAPSE_ASSEMBLY		46	0.150446	1.19867	0.251509	0.389708	1	7141	tags=65%, list=50%, signal=131%
GOBP_ACTIVIN_RECEPTOR_SIGNALING_PATHWAY	GOBP_ACTIVIN_RECEPTOR_SIGNALING_PATHWAY		43	0.154893	1.19826	0.221374	0.39001	1	8386	tags=74%, list=59%, signal=181%
GOBP_S_ADENOSYLMETHIONINE_METABOLIC_PROCESS	GOBP_S_ADENOSYLMETHIONINE_METABOLIC_PROCESS		15	0.252893	1.19795	0.238659	0.390174	1	4939	tags=60%, list=35%, signal=92%
GOBP_NEGATIVE_REGULATION_OF_AMIDE_METABOLIC_PROCESS	GOBP_NEGATIVE_REGULATION_OF_AMIDE_METABOLIC_PROCESS		22	0.208997	1.19745	0.221532	0.39058	1	7374	tags=73%, list=52%, signal=151%
GOBP_PROTEIN_METHYLATION	GOBP_PROTEIN_METHYLATION		34	0.173991	1.19737	0.242798	0.390425	1	9242	tags=82%, list=65%, signal=235%
GOBP_METAPHASE_CHROMOSOME_ALIGNMENT	GOBP_METAPHASE_CHROMOSOME_ALIGNMENT		84	0.111991	1.19656	0.244259	0.391232	1	11621	tags=93%, list=82%, signal=505%
GOBP_RESPONSE_TO_IMMOBILIZATION_STRESS	GOBP_RESPONSE_TO_IMMOBILIZATION_STRESS		26	0.195819	1.1959	0.217726	0.391913	1	2142	tags=35%, list=15%, signal=41%
GOBP_POSITIVE_REGULATION_OF_SMALL_GTPASE_MEDIATED_SIGNAL_TRANSDUCTION	GOBP_POSITIVE_REGULATION_OF_SMALL_GTPASE_MEDIATED_SIGNAL_TRANSDUCTION		73	0.122895	1.19547	0.249497	0.392241	1	5663	tags=52%, list=40%, signal=86%
GOBP_ADIPOSE_TISSUE_DEVELOPMENT	GOBP_ADIPOSE_TISSUE_DEVELOPMENT		65	0.128348	1.19506	0.244489	0.392572	1	5402	tags=51%, list=38%, signal=81%
GOBP_REGULATION_OF_RECEPTOR_BINDING	GOBP_REGULATION_OF_RECEPTOR_BINDING		20	0.223752	1.19385	0.228283	0.393963	1	3932	tags=50%, list=28%, signal=69%
GOBP_POSITIVE_REGULATION_OF_TRANSCRIPTION_BY_RNA_POLYMERASE_I	GOBP_POSITIVE_REGULATION_OF_TRANSCRIPTION_BY_RNA_POLYMERASE_I		33	0.175667	1.19368	0.223529	0.393951	1	9142	tags=82%, list=64%, signal=229%
GOBP_POSITIVE_REGULATION_OF_PHOSPHATIDYLINOSITOL_3_KINASE_PROTEIN_KINASE_B_SIGNAL_TRANSDUCTION	GOBP_POSITIVE_REGULATION_OF_PHOSPHATIDYLINOSITOL_3_KINASE_PROTEIN_KINASE_B_SIGNAL_TRANSDUCTION		184	0.0768172	1.19335	0.231237	0.394152	1	3558	tags=33%, list=25%, signal=43%
GOBP_PHOSPHATIDYLINOSITOL_DEPHOSPHORYLATION	GOBP_PHOSPHATIDYLINOSITOL_DEPHOSPHORYLATION		26	0.193107	1.19281	0.251546	0.394626	1	9291	tags=85%, list=65%, signal=244%
GOBP_REGULATION_OF_ACTIN_FILAMENT_ORGANIZATION	GOBP_REGULATION_OF_ACTIN_FILAMENT_ORGANIZATION		240	0.0664944	1.1925	0.251004	0.394819	1	1321	tags=16%, list=9%, signal=17%
GOBP_CENTROMERE_COMPLEX_ASSEMBLY	GOBP_CENTROMERE_COMPLEX_ASSEMBLY		24	0.203033	1.19238	0.233129	0.394707	1	10745	tags=96%, list=76%, signal=391%
GOBP_ORGANIC_HYDROXY_COMPOUND_TRANSPORT	GOBP_ORGANIC_HYDROXY_COMPOUND_TRANSPORT		259	0.0642361	1.19221	0.226	0.394671	1	3330	tags=30%, list=23%, signal=38%
GOBP_POLYSACCHARIDE_BIOSYNTHETIC_PROCESS	GOBP_POLYSACCHARIDE_BIOSYNTHETIC_PROCESS		59	0.130548	1.19212	0.207921	0.394537	1	3935	tags=41%, list=28%, signal=56%
GOBP_BEHAVIORAL_RESPONSE_TO_PAIN	GOBP_BEHAVIORAL_RESPONSE_TO_PAIN		26	0.198003	1.19195	0.252988	0.394506	1	2111	tags=35%, list=15%, signal=41%
GOBP_CELLULAR_RESPONSE_TO_LIGHT_STIMULUS	GOBP_CELLULAR_RESPONSE_TO_LIGHT_STIMULUS		94	0.105397	1.19193	0.228106	0.39428	1	7436	tags=63%, list=52%, signal=131%
GOBP_RESPONSE_TO_CAMP	GOBP_RESPONSE_TO_CAMP		92	0.105801	1.19126	0.216	0.394929	1	3296	tags=34%, list=23%, signal=44%
GOBP_POSITIVE_REGULATION_OF_HYDROLASE_ACTIVITY	GOBP_POSITIVE_REGULATION_OF_HYDROLASE_ACTIVITY		198	0.0732051	1.19103	0.252101	0.394953	1	6873	tags=56%, list=48%, signal=106%
GOBP_VASCULAR_ENDOTHELIAL_GROWTH_FACTOR_PRODUCTION	GOBP_VASCULAR_ENDOTHELIAL_GROWTH_FACTOR_PRODUCTION		36	0.163328	1.19049	0.241164	0.395458	1	9138	tags=81%, list=64%, signal=225%
GOBP_EMBRYONIC_BRAIN_DEVELOPMENT	GOBP_EMBRYONIC_BRAIN_DEVELOPMENT		22	0.208488	1.18946	0.234252	0.396628	1	5442	tags=59%, list=38%, signal=96%
GOBP_PROTEIN_DESTABILIZATION	GOBP_PROTEIN_DESTABILIZATION		55	0.134159	1.18892	0.227557	0.397126	1	10251	tags=85%, list=72%, signal=305%
GOBP_REGULATION_OF_NUCLEOTIDE_EXCISION_REPAIR	GOBP_REGULATION_OF_NUCLEOTIDE_EXCISION_REPAIR		27	0.194681	1.18887	0.243802	0.396921	1	10930	tags=96%, list=77%, signal=415%
GOBP_POSITIVE_REGULATION_OF_VASCULAR_ASSOCIATED_SMOOTH_MUSCLE_CELL_PROLIFERATION	GOBP_POSITIVE_REGULATION_OF_VASCULAR_ASSOCIATED_SMOOTH_MUSCLE_CELL_PROLIFERATION		42	0.154445	1.18826	0.223969	0.397515	1	6274	tags=60%, list=44%, signal=106%
GOBP_POSITIVE_REGULATION_OF_MRNA_PROCESSING	GOBP_POSITIVE_REGULATION_OF_MRNA_PROCESSING		35	0.168673	1.18702	0.231683	0.398952	1	8983	tags=80%, list=63%, signal=217%
GOBP_REGULATION_OF_MACROPHAGE_DERIVED_FOAM_CELL_DIFFERENTIATION	GOBP_REGULATION_OF_MACROPHAGE_DERIVED_FOAM_CELL_DIFFERENTIATION		27	0.187476	1.18475	0.225352	0.401782	1	2605	tags=37%, list=18%, signal=45%
GOBP_NEURON_FATE_SPECIFICATION	GOBP_NEURON_FATE_SPECIFICATION		33	0.174964	1.18471	0.23431	0.401577	1	1826	tags=30%, list=13%, signal=35%
GOBP_POSITIVE_REGULATION_OF_VASCULAR_ENDOTHELIAL_GROWTH_FACTOR_PRODUCTION	GOBP_POSITIVE_REGULATION_OF_VASCULAR_ENDOTHELIAL_GROWTH_FACTOR_PRODUCTION		27	0.189728	1.18383	0.258517	0.402551	1	11527	tags=100%, list=81%, signal=527%
GOBP_ODONTOBLAST_DIFFERENTIATION	GOBP_ODONTOBLAST_DIFFERENTIATION		16	0.246106	1.18313	0.250965	0.403285	1	6280	tags=69%, list=44%, signal=123%
GOBP_REGULATION_OF_PROTEIN_STABILITY	GOBP_REGULATION_OF_PROTEIN_STABILITY		315	0.0584149	1.18296	0.256654	0.403263	1	9796	tags=75%, list=69%, signal=234%
GOBP_NEGATIVE_REGULATION_OF_CELL_DIVISION	GOBP_NEGATIVE_REGULATION_OF_CELL_DIVISION		15	0.252734	1.18277	0.219207	0.403272	1	1149	tags=33%, list=8%, signal=36%
GOBP_CELLULAR_RESPONSE_TO_FLUID_SHEAR_STRESS	GOBP_CELLULAR_RESPONSE_TO_FLUID_SHEAR_STRESS		20	0.217904	1.18266	0.230769	0.403161	1	3304	tags=45%, list=23%, signal=59%
GOBP_MITOTIC_SPINDLE_ASSEMBLY	GOBP_MITOTIC_SPINDLE_ASSEMBLY		67	0.125068	1.18235	0.261386	0.403319	1	10115	tags=84%, list=71%, signal=288%
GOBP_CELL_CYCLE_G2_M_PHASE_TRANSITION	GOBP_CELL_CYCLE_G2_M_PHASE_TRANSITION		137	0.0880478	1.18226	0.253817	0.403157	1	8205	tags=66%, list=58%, signal=156%
GOBP_RESPONSE_TO_ACIDIC_PH	GOBP_RESPONSE_TO_ACIDIC_PH		20	0.220932	1.18201	0.23062	0.40324	1	3261	tags=45%, list=23%, signal=58%
GOBP_POSITIVE_REGULATION_OF_TRIGLYCERIDE_BIOSYNTHETIC_PROCESS	GOBP_POSITIVE_REGULATION_OF_TRIGLYCERIDE_BIOSYNTHETIC_PROCESS		18	0.230214	1.18154	0.240481	0.403597	1	7000	tags=72%, list=49%, signal=142%
GOBP_NEGATIVE_REGULATION_OF_INFLAMMATORY_RESPONSE	GOBP_NEGATIVE_REGULATION_OF_INFLAMMATORY_RESPONSE		149	0.0852123	1.18126	0.219616	0.403757	1	6149	tags=52%, list=43%, signal=90%
GOBP_POSITIVE_REGULATION_OF_P38MAPK_CASCADE	GOBP_POSITIVE_REGULATION_OF_P38MAPK_CASCADE		28	0.185212	1.18077	0.238384	0.404167	1	3465	tags=43%, list=24%, signal=57%
GOBP_NEGATIVE_REGULATION_OF_PROTEIN_CATABOLIC_PROCESS	GOBP_NEGATIVE_REGULATION_OF_PROTEIN_CATABOLIC_PROCESS		102	0.0998419	1.18014	0.266385	0.404769	1	8070	tags=67%, list=57%, signal=153%
GOBP_PEPTIDYL_TYROSINE_DEPHOSPHORYLATION	GOBP_PEPTIDYL_TYROSINE_DEPHOSPHORYLATION		24	0.201824	1.18006	0.271047	0.40461	1	8392	tags=79%, list=59%, signal=193%
GOBP_REGULATION_OF_COLLAGEN_METABOLIC_PROCESS	GOBP_REGULATION_OF_COLLAGEN_METABOLIC_PROCESS		57	0.131657	1.17974	0.258586	0.404765	1	4122	tags=42%, list=29%, signal=59%
GOBP_CLATHRIN_DEPENDENT_ENDOCYTOSIS	GOBP_CLATHRIN_DEPENDENT_ENDOCYTOSIS		49	0.141347	1.17955	0.242308	0.404772	1	4671	tags=47%, list=33%, signal=70%
GOBP_STEROID_HORMONE_BIOSYNTHETIC_PROCESS	GOBP_STEROID_HORMONE_BIOSYNTHETIC_PROCESS		36	0.169917	1.17895	0.242481	0.405345	1	1539	tags=28%, list=11%, signal=31%
GOBP_ASTROCYTE_DEVELOPMENT	GOBP_ASTROCYTE_DEVELOPMENT		35	0.165535	1.17879	0.258317	0.405295	1	5777	tags=57%, list=41%, signal=96%
GOBP_REGULATION_OF_HEART_RATE_BY_CARDIAC_CONDUCTION	GOBP_REGULATION_OF_HEART_RATE_BY_CARDIAC_CONDUCTION		36	0.16979	1.17877	0.244444	0.405079	1	4306	tags=47%, list=30%, signal=68%
GOBP_PROTEIN_AUTOUBIQUITINATION	GOBP_PROTEIN_AUTOUBIQUITINATION		65	0.123008	1.17849	0.238193	0.405217	1	8103	tags=69%, list=57%, signal=160%
GOBP_NUCLEAR_TRANSCRIBED_MRNA_CATABOLIC_PROCESS_NONSENSE_MEDIATED_DECAY	GOBP_NUCLEAR_TRANSCRIBED_MRNA_CATABOLIC_PROCESS_NONSENSE_MEDIATED_DECAY		39	0.160304	1.17849	0.240076	0.40495	1	10488	tags=90%, list=74%, signal=341%
GOBP_PRESYNAPTIC_ENDOCYTOSIS	GOBP_PRESYNAPTIC_ENDOCYTOSIS		87	0.10844	1.17816	0.246602	0.405131	1	5822	tags=52%, list=41%, signal=87%
GOBP_AXONAL_FASCICULATION	GOBP_AXONAL_FASCICULATION		24	0.207391	1.17785	0.251923	0.405282	1	1795	tags=33%, list=13%, signal=38%
GOBP_NEGATIVE_REGULATION_OF_DNA_METABOLIC_PROCESS	GOBP_NEGATIVE_REGULATION_OF_DNA_METABOLIC_PROCESS		106	0.0996157	1.17636	0.248092	0.40712	1	11204	tags=89%, list=79%, signal=415%
GOBP_ADAPTIVE_THERMOGENESIS	GOBP_ADAPTIVE_THERMOGENESIS		159	0.0789773	1.17606	0.238372	0.407263	1	5507	tags=47%, list=39%, signal=75%
GOBP_POSITIVE_REGULATION_OF_GLUCONEOGENESIS	GOBP_POSITIVE_REGULATION_OF_GLUCONEOGENESIS		25	0.201054	1.17605	0.253521	0.407014	1	10797	tags=96%, list=76%, signal=398%
GOBP_CELL_DIFFERENTIATION_IN_HINDBRAIN	GOBP_CELL_DIFFERENTIATION_IN_HINDBRAIN		25	0.198281	1.17595	0.24498	0.406872	1	8561	tags=80%, list=60%, signal=201%
GOBP_REGULATION_OF_SMOOTH_MUSCLE_CELL_DIFFERENTIATION	GOBP_REGULATION_OF_SMOOTH_MUSCLE_CELL_DIFFERENTIATION		37	0.160971	1.17561	0.244533	0.407083	1	2328	tags=32%, list=16%, signal=39%
GOBP_BIOLOGICAL_PROCESS_INVOLVED_IN_SYMBIOTIC_INTERACTION	GOBP_BIOLOGICAL_PROCESS_INVOLVED_IN_SYMBIOTIC_INTERACTION		157	0.0791926	1.17504	0.24502	0.40762	1	2599	tags=26%, list=18%, signal=32%
GOBP_NEGATIVE_REGULATION_OF_INTRACELLULAR_PROTEIN_TRANSPORT	GOBP_NEGATIVE_REGULATION_OF_INTRACELLULAR_PROTEIN_TRANSPORT		38	0.157462	1.17478	0.256198	0.40769	1	10864	tags=92%, list=76%, signal=389%
GOBP_NEGATIVE_REGULATION_OF_MAPK_CASCADE	GOBP_NEGATIVE_REGULATION_OF_MAPK_CASCADE		160	0.0781973	1.17411	0.247212	0.408364	1	8232	tags=66%, list=58%, signal=154%
GOBP_REGULATION_OF_AMYLOID_BETA_CLEARANCE	GOBP_REGULATION_OF_AMYLOID_BETA_CLEARANCE		18	0.22958	1.17392	0.253608	0.408385	1	7009	tags=72%, list=49%, signal=142%
GOBP_POSTSYNAPTIC_DENSITY_ORGANIZATION	GOBP_POSTSYNAPTIC_DENSITY_ORGANIZATION		51	0.141765	1.17305	0.252101	0.409382	1	1894	tags=27%, list=13%, signal=32%
GOBP_FATTY_ACID_HOMEOSTASIS	GOBP_FATTY_ACID_HOMEOSTASIS		16	0.240474	1.17216	0.242126	0.410352	1	6360	tags=69%, list=45%, signal=124%
GOBP_NEGATIVE_REGULATION_OF_FATTY_ACID_METABOLIC_PROCESS	GOBP_NEGATIVE_REGULATION_OF_FATTY_ACID_METABOLIC_PROCESS		36	0.161278	1.17206	0.257928	0.410246	1	7982	tags=72%, list=56%, signal=164%
GOBP_RESPONSE_TO_AMINE	GOBP_RESPONSE_TO_AMINE		46	0.147912	1.17199	0.257143	0.410075	1	5322	tags=52%, list=37%, signal=83%
GOBP_HEART_VALVE_DEVELOPMENT	GOBP_HEART_VALVE_DEVELOPMENT		67	0.119522	1.1719	0.240326	0.409926	1	10618	tags=87%, list=75%, signal=340%
GOBP_POSITIVE_REGULATION_OF_NUCLEOCYTOPLASMIC_TRANSPORT	GOBP_POSITIVE_REGULATION_OF_NUCLEOCYTOPLASMIC_TRANSPORT		72	0.118054	1.17054	0.251559	0.411611	1	10377	tags=85%, list=73%, signal=312%
GOBP_POSITIVE_REGULATION_OF_MAP_KINASE_ACTIVITY	GOBP_POSITIVE_REGULATION_OF_MAP_KINASE_ACTIVITY		96	0.10286	1.16825	0.270793	0.414516	1	620	tags=15%, list=4%, signal=15%
GOBP_REGULATION_OF_ENDOPLASMIC_RETICULUM_STRESS_INDUCED_INTRINSIC_APOPTOTIC_SIGNALING_PATHWAY	GOBP_REGULATION_OF_ENDOPLASMIC_RETICULUM_STRESS_INDUCED_INTRINSIC_APOPTOTIC_SIGNALING_PATHWAY		29	0.182412	1.16816	0.24	0.414369	1	2314	tags=34%, list=16%, signal=41%
GOBP_BODY_FLUID_SECRETION	GOBP_BODY_FLUID_SECRETION		92	0.101007	1.16803	0.251586	0.414274	1	2900	tags=30%, list=20%, signal=38%
GOBP_DETECTION_OF_MECHANICAL_STIMULUS_INVOLVED_IN_SENSORY_PERCEPTION	GOBP_DETECTION_OF_MECHANICAL_STIMULUS_INVOLVED_IN_SENSORY_PERCEPTION		37	0.157951	1.16791	0.270707	0.414171	1	5830	tags=57%, list=41%, signal=96%
GOBP_POSITIVE_REGULATION_OF_MONOOXYGENASE_ACTIVITY	GOBP_POSITIVE_REGULATION_OF_MONOOXYGENASE_ACTIVITY		19	0.220406	1.16785	0.27853	0.414002	1	5102	tags=58%, list=36%, signal=90%
GOBP_HEMATOPOIETIC_PROGENITOR_CELL_DIFFERENTIATION	GOBP_HEMATOPOIETIC_PROGENITOR_CELL_DIFFERENTIATION		150	0.0820212	1.16703	0.272912	0.414887	1	9084	tags=72%, list=64%, signal=197%
GOBP_FRUCTOSE_6_PHOSPHATE_METABOLIC_PROCESS	GOBP_FRUCTOSE_6_PHOSPHATE_METABOLIC_PROCESS		16	0.241231	1.1668	0.261134	0.414979	1	2794	tags=44%, list=20%, signal=54%
GOBP_NEGATIVE_REGULATION_OF_MYOTUBE_DIFFERENTIATION	GOBP_NEGATIVE_REGULATION_OF_MYOTUBE_DIFFERENTIATION		15	0.243526	1.16677	0.25	0.414756	1	4124	tags=53%, list=29%, signal=75%
GOBP_CARDIAC_VENTRICLE_MORPHOGENESIS	GOBP_CARDIAC_VENTRICLE_MORPHOGENESIS		73	0.116998	1.16627	0.28	0.415178	1	5162	tags=48%, list=36%, signal=75%
GOBP_REGULATION_OF_SUPRAMOLECULAR_FIBER_ORGANIZATION	GOBP_REGULATION_OF_SUPRAMOLECULAR_FIBER_ORGANIZATION		342	0.0545496	1.16542	0.259259	0.416083	1	1321	tags=15%, list=9%, signal=16%
GOBP_RECEPTOR_INTERNALIZATION	GOBP_RECEPTOR_INTERNALIZATION		149	0.0819515	1.16493	0.261053	0.416532	1	6004	tags=50%, list=42%, signal=86%
GOBP_REGULATION_OF_ESTABLISHMENT_OR_MAINTENANCE_OF_CELL_POLARITY	GOBP_REGULATION_OF_ESTABLISHMENT_OR_MAINTENANCE_OF_CELL_POLARITY		22	0.20497	1.16427	0.278226	0.417204	1	8724	tags=82%, list=61%, signal=211%
GOBP_REGULATION_OF_SYNAPTIC_TRANSMISSION_GABAERGIC	GOBP_REGULATION_OF_SYNAPTIC_TRANSMISSION_GABAERGIC		38	0.160281	1.1637	0.265385	0.417734	1	4462	tags=47%, list=31%, signal=69%
GOBP_KERATINOCYTE_PROLIFERATION	GOBP_KERATINOCYTE_PROLIFERATION		62	0.123967	1.16314	0.273469	0.418235	1	5813	tags=53%, list=41%, signal=90%
GOBP_REGULATION_OF_CELLULAR_COMPONENT_SIZE	GOBP_REGULATION_OF_CELLULAR_COMPONENT_SIZE		349	0.0531181	1.16204	0.273245	0.419497	1	2033	tags=19%, list=14%, signal=22%
GOBP_REGULATION_OF_GLUCONEOGENESIS	GOBP_REGULATION_OF_GLUCONEOGENESIS		55	0.13212	1.16099	0.281496	0.420713	1	10797	tags=89%, list=76%, signal=369%
GOBP_SNARE_COMPLEX_ASSEMBLY	GOBP_SNARE_COMPLEX_ASSEMBLY		15	0.250232	1.15948	0.270793	0.42265	1	7821	tags=80%, list=55%, signal=178%
GOBP_MITOTIC_METAPHASE_CHROMOSOME_ALIGNMENT	GOBP_MITOTIC_METAPHASE_CHROMOSOME_ALIGNMENT		56	0.129697	1.15924	0.265136	0.422707	1	11621	tags=95%, list=82%, signal=516%
GOBP_REGULATION_OF_PROTEIN_IMPORT_INTO_NUCLEUS	GOBP_REGULATION_OF_PROTEIN_IMPORT_INTO_NUCLEUS		73	0.115259	1.15858	0.265432	0.423372	1	9862	tags=81%, list=69%, signal=262%
GOBP_REGULATION_OF_GTPASE_ACTIVITY	GOBP_REGULATION_OF_GTPASE_ACTIVITY		191	0.0721117	1.15844	0.268908	0.423281	1	6135	tags=50%, list=43%, signal=87%
GOBP_NEGATIVE_REGULATION_OF_AMINE_TRANSPORT	GOBP_NEGATIVE_REGULATION_OF_AMINE_TRANSPORT		26	0.18962	1.1581	0.249493	0.423476	1	2230	tags=35%, list=16%, signal=41%
GOBP_SPHINGOLIPID_MEDIATED_SIGNALING_PATHWAY	GOBP_SPHINGOLIPID_MEDIATED_SIGNALING_PATHWAY		15	0.247116	1.15794	0.260692	0.423454	1	4073	tags=53%, list=29%, signal=75%
GOBP_POSITIVE_REGULATION_OF_TYPE_I_INTERFERON_MEDIATED_SIGNALING_PATHWAY	GOBP_POSITIVE_REGULATION_OF_TYPE_I_INTERFERON_MEDIATED_SIGNALING_PATHWAY		19	0.215114	1.15775	0.262745	0.423439	1	9668	tags=89%, list=68%, signal=279%
GOBP_RESPONSE_TO_MECHANICAL_STIMULUS	GOBP_RESPONSE_TO_MECHANICAL_STIMULUS		210	0.0680979	1.1572	0.275574	0.423923	1	4801	tags=40%, list=34%, signal=60%
GOBP_ACTOMYOSIN_STRUCTURE_ORGANIZATION	GOBP_ACTOMYOSIN_STRUCTURE_ORGANIZATION		208	0.0695433	1.15704	0.25498	0.423878	1	2443	tags=24%, list=17%, signal=29%
GOBP_POSITIVE_REGULATION_OF_BEHAVIOR	GOBP_POSITIVE_REGULATION_OF_BEHAVIOR		27	0.183497	1.15626	0.265849	0.424695	1	5295	tags=56%, list=37%, signal=88%
GOBP_ENDOCYTIC_RECYCLING	GOBP_ENDOCYTIC_RECYCLING		79	0.109013	1.15551	0.244275	0.425515	1	7818	tags=66%, list=55%, signal=145%
GOBP_REGULATION_OF_NEURON_DIFFERENTIATION	GOBP_REGULATION_OF_NEURON_DIFFERENTIATION		198	0.069695	1.15493	0.243615	0.426047	1	3762	tags=33%, list=26%, signal=45%
GOBP_RNA_DECAPPING	GOBP_RNA_DECAPPING		16	0.23776	1.15455	0.246347	0.426361	1	9065	tags=88%, list=64%, signal=241%
GOBP_RESPONSE_TO_NERVE_GROWTH_FACTOR	GOBP_RESPONSE_TO_NERVE_GROWTH_FACTOR		56	0.130988	1.15451	0.278978	0.426132	1	5508	tags=52%, list=39%, signal=84%
GOBP_NEGATIVE_REGULATION_OF_OSTEOBLAST_DIFFERENTIATION	GOBP_NEGATIVE_REGULATION_OF_OSTEOBLAST_DIFFERENTIATION		54	0.135192	1.15411	0.292576	0.426433	1	6511	tags=59%, list=46%, signal=109%
GOBP_VOCALIZATION_BEHAVIOR	GOBP_VOCALIZATION_BEHAVIOR		20	0.219816	1.15275	0.25498	0.428164	1	5410	tags=60%, list=38%, signal=97%
GOBP_PLASMA_LIPOPROTEIN_PARTICLE_CLEARANCE	GOBP_PLASMA_LIPOPROTEIN_PARTICLE_CLEARANCE		36	0.162586	1.15145	0.282276	0.429783	1	1643	tags=28%, list=12%, signal=31%
GOBP_PEPTIDYL_TYROSINE_AUTOPHOSPHORYLATION	GOBP_PEPTIDYL_TYROSINE_AUTOPHOSPHORYLATION		20	0.213474	1.15111	0.280488	0.429978	1	4789	tags=55%, list=34%, signal=83%
GOBP_GROWTH_PLATE_CARTILAGE_DEVELOPMENT	GOBP_GROWTH_PLATE_CARTILAGE_DEVELOPMENT		20	0.214386	1.15014	0.276289	0.431117	1	4065	tags=50%, list=29%, signal=70%
GOBP_SCF_DEPENDENT_PROTEASOMAL_UBIQUITIN_DEPENDENT_PROTEIN_CATABOLIC_PROCESS	GOBP_SCF_DEPENDENT_PROTEASOMAL_UBIQUITIN_DEPENDENT_PROTEIN_CATABOLIC_PROCESS		42	0.147022	1.14809	0.294949	0.433908	1	10781	tags=90%, list=76%, signal=373%
GOBP_POSITIVE_REGULATION_OF_EPITHELIAL_CELL_PROLIFERATION	GOBP_POSITIVE_REGULATION_OF_EPITHELIAL_CELL_PROLIFERATION		215	0.0677603	1.14804	0.268443	0.433694	1	8707	tags=68%, list=61%, signal=172%
GOBP_ACUTE_INFLAMMATORY_RESPONSE_TO_ANTIGENIC_STIMULUS	GOBP_ACUTE_INFLAMMATORY_RESPONSE_TO_ANTIGENIC_STIMULUS		27	0.186391	1.14749	0.276289	0.434242	1	1567	tags=30%, list=11%, signal=33%
GOBP_NEGATIVE_REGULATION_OF_CELL_SUBSTRATE_JUNCTION_ORGANIZATION	GOBP_NEGATIVE_REGULATION_OF_CELL_SUBSTRATE_JUNCTION_ORGANIZATION		15	0.243404	1.14684	0.272541	0.434914	1	7918	tags=80%, list=56%, signal=180%
GOBP_POSITIVE_REGULATION_OF_CALCIUM_MEDIATED_SIGNALING	GOBP_POSITIVE_REGULATION_OF_CALCIUM_MEDIATED_SIGNALING		59	0.123832	1.14585	0.291498	0.436029	1	3307	tags=36%, list=23%, signal=46%
GOBP_MALE_SEX_DIFFERENTIATION	GOBP_MALE_SEX_DIFFERENTIATION		159	0.0785873	1.14529	0.26834	0.436578	1	3992	tags=36%, list=28%, signal=49%
GOBP_REGULATION_OF_CIRCADIAN_SLEEP_WAKE_CYCLE	GOBP_REGULATION_OF_CIRCADIAN_SLEEP_WAKE_CYCLE		23	0.201173	1.14527	0.266667	0.436327	1	5799	tags=61%, list=41%, signal=103%
GOBP_NEGATIVE_REGULATION_OF_MULTICELLULAR_ORGANISM_GROWTH	GOBP_NEGATIVE_REGULATION_OF_MULTICELLULAR_ORGANISM_GROWTH		16	0.238996	1.14506	0.248988	0.43636	1	6381	tags=69%, list=45%, signal=125%
GOBP_RHYTHMIC_BEHAVIOR	GOBP_RHYTHMIC_BEHAVIOR		58	0.127154	1.14493	0.273085	0.43628	1	5799	tags=53%, list=41%, signal=90%
GOBP_EPITHELIAL_CELL_CELL_ADHESION	GOBP_EPITHELIAL_CELL_CELL_ADHESION		15	0.239256	1.14443	0.260956	0.436769	1	8925	tags=87%, list=63%, signal=232%
GOBP_NEUROTRANSMITTER_RECEPTOR_TRANSPORT_TO_PLASMA_MEMBRANE	GOBP_NEUROTRANSMITTER_RECEPTOR_TRANSPORT_TO_PLASMA_MEMBRANE		22	0.202799	1.14376	0.297521	0.43746	1	7462	tags=73%, list=52%, signal=153%
GOBP_POSITIVE_REGULATION_OF_PEPTIDASE_ACTIVITY	GOBP_POSITIVE_REGULATION_OF_PEPTIDASE_ACTIVITY		25	0.192057	1.14337	0.279441	0.437758	1	6374	tags=64%, list=45%, signal=116%
GOBP_GLYCOSIDE_METABOLIC_PROCESS	GOBP_GLYCOSIDE_METABOLIC_PROCESS		18	0.226943	1.14212	0.296	0.439321	1	726	tags=28%, list=5%, signal=29%
GOBP_POSITIVE_REGULATION_OF_TYROSINE_PHOSPHORYLATION_OF_STAT_PROTEIN	GOBP_POSITIVE_REGULATION_OF_TYROSINE_PHOSPHORYLATION_OF_STAT_PROTEIN		47	0.144221	1.14169	0.285164	0.439641	1	2796	tags=34%, list=20%, signal=42%
GOBP_REGULATION_OF_NECROPTOTIC_PROCESS	GOBP_REGULATION_OF_NECROPTOTIC_PROCESS		22	0.205872	1.14155	0.29703	0.439566	1	10004	tags=91%, list=70%, signal=306%
GOBP_MOTOR_NEURON_APOPTOTIC_PROCESS	GOBP_MOTOR_NEURON_APOPTOTIC_PROCESS		23	0.199211	1.14106	0.309524	0.43998	1	10155	tags=91%, list=71%, signal=319%
GOBP_ACTIVATION_OF_GTPASE_ACTIVITY	GOBP_ACTIVATION_OF_GTPASE_ACTIVITY		43	0.145223	1.141	0.286017	0.439795	1	3893	tags=42%, list=27%, signal=57%
GOBP_NEGATIVE_REGULATION_OF_NUCLEOCYTOPLASMIC_TRANSPORT	GOBP_NEGATIVE_REGULATION_OF_NUCLEOCYTOPLASMIC_TRANSPORT		30	0.16968	1.14084	0.309478	0.439741	1	10864	tags=93%, list=76%, signal=395%
GOBP_CIRCADIAN_SLEEP_WAKE_CYCLE	GOBP_CIRCADIAN_SLEEP_WAKE_CYCLE		31	0.173175	1.13924	0.292017	0.441811	1	5799	tags=58%, list=41%, signal=98%
GOBP_REGULATION_OF_CALCIUM_MEDIATED_SIGNALING	GOBP_REGULATION_OF_CALCIUM_MEDIATED_SIGNALING		94	0.101309	1.13887	0.270059	0.442097	1	3409	tags=34%, list=24%, signal=44%
GOBP_TRNA_METHYLATION	GOBP_TRNA_METHYLATION		30	0.176438	1.13867	0.298387	0.442122	1	9346	tags=83%, list=66%, signal=243%
GOBP_POSTSYNAPTIC_ACTIN_CYTOSKELETON_ORGANIZATION	GOBP_POSTSYNAPTIC_ACTIN_CYTOSKELETON_ORGANIZATION		22	0.202726	1.13807	0.27853	0.442733	1	4231	tags=50%, list=30%, signal=71%
GOBP_PREPULSE_INHIBITION	GOBP_PREPULSE_INHIBITION		15	0.243404	1.13774	0.270378	0.442926	1	7918	tags=80%, list=56%, signal=180%
GOBP_POSITIVE_REGULATION_OF_INTERLEUKIN_1_BETA_PRODUCTION	GOBP_POSITIVE_REGULATION_OF_INTERLEUKIN_1_BETA_PRODUCTION		54	0.131688	1.1377	0.272917	0.442707	1	2347	tags=30%, list=17%, signal=35%
GOBP_VIRAL_TRANSCRIPTION	GOBP_VIRAL_TRANSCRIPTION		54	0.129963	1.1367	0.26087	0.443887	1	10272	tags=85%, list=72%, signal=306%
GOBP_POSTSYNAPTIC_CYTOSKELETON_ORGANIZATION	GOBP_POSTSYNAPTIC_CYTOSKELETON_ORGANIZATION		27	0.184243	1.13662	0.272727	0.443737	1	4231	tags=48%, list=30%, signal=68%
GOBP_POSITIVE_REGULATION_OF_MACROPHAGE_DERIVED_FOAM_CELL_DIFFERENTIATION	GOBP_POSITIVE_REGULATION_OF_MACROPHAGE_DERIVED_FOAM_CELL_DIFFERENTIATION		17	0.228788	1.13578	0.312245	0.444731	1	2605	tags=41%, list=18%, signal=50%
GOBP_GLYCOLIPID_BIOSYNTHETIC_PROCESS	GOBP_GLYCOLIPID_BIOSYNTHETIC_PROCESS		65	0.120757	1.13541	0.288066	0.444975	1	12073	tags=97%, list=85%, signal=639%
GOBP_STEM_CELL_DIVISION	GOBP_STEM_CELL_DIVISION		41	0.146336	1.13508	0.299197	0.445178	1	7289	tags=66%, list=51%, signal=135%
GOBP_REGULATION_OF_EPITHELIAL_CELL_MIGRATION	GOBP_REGULATION_OF_EPITHELIAL_CELL_MIGRATION		75	0.110104	1.13427	0.28655	0.446094	1	6026	tags=53%, list=42%, signal=92%
GOBP_DEFENSE_RESPONSE_TO_VIRUS	GOBP_DEFENSE_RESPONSE_TO_VIRUS		277	0.0579839	1.13389	0.303213	0.446373	1	6532	tags=52%, list=46%, signal=94%
GOBP_REGULATION_OF_PROSTAGLANDIN_SECRETION	GOBP_REGULATION_OF_PROSTAGLANDIN_SECRETION		16	0.229057	1.13281	0.283673	0.447766	1	7411	tags=75%, list=52%, signal=156%
GOBP_MEIOTIC_CELL_CYCLE	GOBP_MEIOTIC_CELL_CYCLE		230	0.0643236	1.13199	0.304436	0.448693	1	10785	tags=82%, list=76%, signal=335%
GOBP_SMAD_PROTEIN_SIGNAL_TRANSDUCTION	GOBP_SMAD_PROTEIN_SIGNAL_TRANSDUCTION		75	0.111648	1.13171	0.296078	0.448873	1	6573	tags=57%, list=46%, signal=106%
GOBP_EPIBOLY	GOBP_EPIBOLY		34	0.157742	1.13093	0.275154	0.449735	1	8636	tags=76%, list=61%, signal=194%
GOBP_NEGATIVE_REGULATION_OF_CARBOHYDRATE_METABOLIC_PROCESS	GOBP_NEGATIVE_REGULATION_OF_CARBOHYDRATE_METABOLIC_PROCESS		66	0.115381	1.13068	0.295238	0.44982	1	3968	tags=39%, list=28%, signal=54%
GOBP_LABYRINTHINE_LAYER_BLOOD_VESSEL_DEVELOPMENT	GOBP_LABYRINTHINE_LAYER_BLOOD_VESSEL_DEVELOPMENT		24	0.19576	1.13009	0.298246	0.450424	1	7293	tags=71%, list=51%, signal=145%
GOBP_REGULATORY_NCRNA_MEDIATED_GENE_SILENCING	GOBP_REGULATORY_NCRNA_MEDIATED_GENE_SILENCING		96	0.0992655	1.12973	0.301181	0.450677	1	7485	tags=63%, list=53%, signal=131%
GOBP_TISSUE_REMODELING	GOBP_TISSUE_REMODELING		205	0.0679422	1.1294	0.29901	0.450907	1	2654	tags=25%, list=19%, signal=31%
GOBP_COCHLEA_MORPHOGENESIS	GOBP_COCHLEA_MORPHOGENESIS		25	0.188616	1.12865	0.306641	0.451728	1	5854	tags=60%, list=41%, signal=102%
GOBP_POSITIVE_REGULATION_OF_EPITHELIAL_CELL_DIFFERENTIATION	GOBP_POSITIVE_REGULATION_OF_EPITHELIAL_CELL_DIFFERENTIATION		60	0.12346	1.12847	0.304636	0.451747	1	2754	tags=32%, list=19%, signal=39%
GOBP_PROSTAGLANDIN_SECRETION	GOBP_PROSTAGLANDIN_SECRETION		19	0.219491	1.12793	0.296774	0.452308	1	5115	tags=58%, list=36%, signal=90%
GOBP_RESPONSE_TO_UV	GOBP_RESPONSE_TO_UV		144	0.0802664	1.1279	0.294479	0.452054	1	8251	tags=66%, list=58%, signal=156%
GOBP_REGULATION_OF_APPETITE	GOBP_REGULATION_OF_APPETITE		21	0.199316	1.12719	0.292398	0.452875	1	5295	tags=57%, list=37%, signal=91%
GOBP_PINOCYTOSIS	GOBP_PINOCYTOSIS		22	0.200853	1.12584	0.297352	0.454586	1	4904	tags=55%, list=34%, signal=83%
GOBP_RESPONSE_TO_TYPE_II_INTERFERON	GOBP_RESPONSE_TO_TYPE_II_INTERFERON		130	0.0842955	1.12517	0.284254	0.455333	1	1546	tags=19%, list=11%, signal=21%
GOBP_RESPONSE_TO_LIPOPROTEIN_PARTICLE	GOBP_RESPONSE_TO_LIPOPROTEIN_PARTICLE		35	0.158917	1.12396	0.313725	0.456848	1	3433	tags=40%, list=24%, signal=53%
GOBP_RESPONSE_TO_HEPATOCYTE_GROWTH_FACTOR	GOBP_RESPONSE_TO_HEPATOCYTE_GROWTH_FACTOR		20	0.21052	1.12385	0.307385	0.45673	1	5542	tags=60%, list=39%, signal=98%
GOBP_ESTABLISHMENT_OF_PROTEIN_LOCALIZATION_TO_POSTSYNAPTIC_MEMBRANE	GOBP_ESTABLISHMENT_OF_PROTEIN_LOCALIZATION_TO_POSTSYNAPTIC_MEMBRANE		19	0.212338	1.12251	0.284369	0.458472	1	7462	tags=74%, list=52%, signal=155%
GOBP_MYOBLAST_DIFFERENTIATION	GOBP_MYOBLAST_DIFFERENTIATION		117	0.0865306	1.12167	0.29979	0.459459	1	3762	tags=35%, list=26%, signal=47%
GOBP_UV_DAMAGE_EXCISION_REPAIR	GOBP_UV_DAMAGE_EXCISION_REPAIR		15	0.238969	1.12101	0.294235	0.460203	1	7981	tags=80%, list=56%, signal=182%
GOBP_REGULATION_OF_ACTIN_FILAMENT_BUNDLE_ASSEMBLY	GOBP_REGULATION_OF_ACTIN_FILAMENT_BUNDLE_ASSEMBLY		109	0.0933411	1.12081	0.310861	0.460214	1	1813	tags=22%, list=13%, signal=25%
GOBP_BIOLOGICAL_PHASE	GOBP_BIOLOGICAL_PHASE		41	0.1492	1.12077	0.287356	0.459978	1	3433	tags=39%, list=24%, signal=51%
GOBP_EMBRYONIC_BODY_MORPHOGENESIS	GOBP_EMBRYONIC_BODY_MORPHOGENESIS		15	0.242428	1.12061	0.286561	0.459909	1	9828	tags=93%, list=69%, signal=302%
GOBP_NEGATIVE_REGULATION_OF_DNA_RECOMBINATION	GOBP_NEGATIVE_REGULATION_OF_DNA_RECOMBINATION		34	0.160424	1.12056	0.281437	0.459701	1	10271	tags=88%, list=72%, signal=317%
GOBP_NEGATIVE_REGULATION_OF_SMOOTH_MUSCLE_CELL_PROLIFERATION	GOBP_NEGATIVE_REGULATION_OF_SMOOTH_MUSCLE_CELL_PROLIFERATION		67	0.11752	1.11952	0.293413	0.460924	1	5340	tags=49%, list=38%, signal=78%
GOBP_NEGATIVE_REGULATION_OF_PROTEIN_IMPORT_INTO_NUCLEUS	GOBP_NEGATIVE_REGULATION_OF_PROTEIN_IMPORT_INTO_NUCLEUS		19	0.21554	1.11854	0.303089	0.462086	1	8165	tags=79%, list=57%, signal=185%
GOBP_REGULATION_OF_RECEPTOR_CLUSTERING	GOBP_REGULATION_OF_RECEPTOR_CLUSTERING		25	0.188884	1.11838	0.311966	0.462066	1	3006	tags=40%, list=21%, signal=51%
GOBP_REGULATION_OF_MYOBLAST_PROLIFERATION	GOBP_REGULATION_OF_MYOBLAST_PROLIFERATION		20	0.206007	1.11837	0.318182	0.461808	1	4184	tags=50%, list=29%, signal=71%
GOBP_GENOMIC_IMPRINTING	GOBP_GENOMIC_IMPRINTING		22	0.202591	1.11831	0.313175	0.461602	1	10697	tags=95%, list=75%, signal=385%
GOBP_POSITIVE_REGULATION_OF_PROTEIN_POLYUBIQUITINATION	GOBP_POSITIVE_REGULATION_OF_PROTEIN_POLYUBIQUITINATION		19	0.2167	1.11799	0.323887	0.461793	1	8897	tags=84%, list=63%, signal=225%
GOBP_SURFACTANT_HOMEOSTASIS	GOBP_SURFACTANT_HOMEOSTASIS		30	0.169422	1.11764	0.278008	0.462062	1	1387	tags=27%, list=10%, signal=29%
GOBP_MOLTING_CYCLE_PROCESS	GOBP_MOLTING_CYCLE_PROCESS		111	0.0899209	1.1176	0.29572	0.461842	1	8339	tags=68%, list=59%, signal=162%
GOBP_NEUROTROPHIN_TRK_RECEPTOR_SIGNALING_PATHWAY	GOBP_NEUROTROPHIN_TRK_RECEPTOR_SIGNALING_PATHWAY		32	0.163542	1.11704	0.319588	0.462388	1	4789	tags=50%, list=34%, signal=75%
GOBP_HAIR_FOLLICLE_MATURATION	GOBP_HAIR_FOLLICLE_MATURATION		24	0.191681	1.11648	0.338374	0.462943	1	8536	tags=79%, list=60%, signal=198%
GOBP_NEGATIVE_REGULATION_OF_EPITHELIAL_CELL_MIGRATION	GOBP_NEGATIVE_REGULATION_OF_EPITHELIAL_CELL_MIGRATION		18	0.217442	1.11569	0.286902	0.463829	1	1651	tags=33%, list=12%, signal=38%
GOBP_POSITIVE_REGULATION_OF_TRANSFERASE_ACTIVITY	GOBP_POSITIVE_REGULATION_OF_TRANSFERASE_ACTIVITY		300	0.0551634	1.11536	0.307252	0.464053	1	3924	tags=33%, list=28%, signal=45%
GOBP_RUFFLE_ASSEMBLY	GOBP_RUFFLE_ASSEMBLY		42	0.147522	1.11484	0.301397	0.464595	1	4002	tags=43%, list=28%, signal=59%
GOBP_POSITIVE_REGULATION_OF_NUCLEAR_DIVISION	GOBP_POSITIVE_REGULATION_OF_NUCLEAR_DIVISION		61	0.122517	1.11449	0.331418	0.464826	1	1528	tags=23%, list=11%, signal=26%
GOBP_DOPAMINE_METABOLIC_PROCESS	GOBP_DOPAMINE_METABOLIC_PROCESS		39	0.15266	1.11435	0.321041	0.464758	1	6950	tags=64%, list=49%, signal=125%
GOBP_MATERNAL_PROCESS_INVOLVED_IN_FEMALE_PREGNANCY	GOBP_MATERNAL_PROCESS_INVOLVED_IN_FEMALE_PREGNANCY		65	0.114743	1.11433	0.318898	0.464508	1	8220	tags=69%, list=58%, signal=163%
GOBP_MEMBRANE_PROTEIN_ECTODOMAIN_PROTEOLYSIS	GOBP_MEMBRANE_PROTEIN_ECTODOMAIN_PROTEOLYSIS		48	0.137295	1.11409	0.309478	0.464556	1	3386	tags=38%, list=24%, signal=49%
GOBP_CARDIAC_ATRIUM_MORPHOGENESIS	GOBP_CARDIAC_ATRIUM_MORPHOGENESIS		28	0.17765	1.11408	0.301848	0.464286	1	5096	tags=54%, list=36%, signal=83%
GOBP_SIGNAL_TRANSDUCTION_IN_ABSENCE_OF_LIGAND	GOBP_SIGNAL_TRANSDUCTION_IN_ABSENCE_OF_LIGAND		73	0.109302	1.11351	0.304175	0.464807	1	8193	tags=68%, list=58%, signal=161%
GOBP_NEGATIVE_REGULATION_OF_DNA_BIOSYNTHETIC_PROCESS	GOBP_NEGATIVE_REGULATION_OF_DNA_BIOSYNTHETIC_PROCESS		29	0.17714	1.11268	0.281496	0.465776	1	7783	tags=72%, list=55%, signal=160%
GOBP_ESTABLISHMENT_OF_EPITHELIAL_CELL_APICAL_BASAL_POLARITY	GOBP_ESTABLISHMENT_OF_EPITHELIAL_CELL_APICAL_BASAL_POLARITY		15	0.233127	1.11257	0.323829	0.465656	1	8064	tags=80%, list=57%, signal=185%
GOBP_POSITIVE_REGULATION_OF_REPRODUCTIVE_PROCESS	GOBP_POSITIVE_REGULATION_OF_REPRODUCTIVE_PROCESS		85	0.101242	1.11207	0.295775	0.466142	1	5762	tags=51%, list=41%, signal=85%
GOBP_ALANINE_TRANSPORT	GOBP_ALANINE_TRANSPORT		18	0.215346	1.11102	0.284274	0.46746	1	4841	tags=56%, list=34%, signal=84%
GOBP_NEGATIVE_REGULATION_OF_DOUBLE_STRAND_BREAK_REPAIR_VIA_HOMOLOGOUS_RECOMBINATION	GOBP_NEGATIVE_REGULATION_OF_DOUBLE_STRAND_BREAK_REPAIR_VIA_HOMOLOGOUS_RECOMBINATION		16	0.232801	1.1109	0.317121	0.467352	1	6469	tags=69%, list=45%, signal=126%
GOBP_MESONEPHROS_DEVELOPMENT	GOBP_MESONEPHROS_DEVELOPMENT		110	0.0901051	1.11039	0.304527	0.467831	1	6743	tags=56%, list=47%, signal=106%
GOBP_RESPONSE_TO_ARSENIC_CONTAINING_SUBSTANCE	GOBP_RESPONSE_TO_ARSENIC_CONTAINING_SUBSTANCE		37	0.152162	1.10997	0.315582	0.468197	1	3606	tags=41%, list=25%, signal=54%
GOBP_REGULATION_OF_CELL_FATE_SPECIFICATION	GOBP_REGULATION_OF_CELL_FATE_SPECIFICATION		23	0.194807	1.10989	0.327935	0.46803	1	7126	tags=70%, list=50%, signal=139%
GOBP_QUATERNARY_AMMONIUM_GROUP_TRANSPORT	GOBP_QUATERNARY_AMMONIUM_GROUP_TRANSPORT		17	0.224423	1.1098	0.319471	0.467871	1	2667	tags=41%, list=19%, signal=51%
GOBP_NEGATIVE_REGULATION_OF_BINDING	GOBP_NEGATIVE_REGULATION_OF_BINDING		120	0.0872344	1.10955	0.311765	0.467946	1	7183	tags=59%, list=51%, signal=119%
GOBP_REGULATION_OF_NITRIC_OXIDE_SYNTHASE_ACTIVITY	GOBP_REGULATION_OF_NITRIC_OXIDE_SYNTHASE_ACTIVITY		17	0.222423	1.10923	0.313131	0.468149	1	5205	tags=59%, list=37%, signal=93%
GOBP_LUNG_ALVEOLUS_DEVELOPMENT	GOBP_LUNG_ALVEOLUS_DEVELOPMENT		69	0.115176	1.10916	0.339731	0.467971	1	8468	tags=71%, list=60%, signal=175%
GOBP_ORGANELLE_INHERITANCE	GOBP_ORGANELLE_INHERITANCE		15	0.233202	1.10849	0.319846	0.468723	1	9011	tags=87%, list=63%, signal=236%
GOBP_POSITIVE_REGULATION_OF_HEMOSTASIS	GOBP_POSITIVE_REGULATION_OF_HEMOSTASIS		26	0.184409	1.10802	0.302905	0.469124	1	1757	tags=31%, list=12%, signal=35%
GOBP_CELL_PROLIFERATION_IN_FOREBRAIN	GOBP_CELL_PROLIFERATION_IN_FOREBRAIN		34	0.159489	1.10628	0.315476	0.471487	1	9866	tags=85%, list=69%, signal=278%
GOBP_REGULATION_OF_MEIOTIC_NUCLEAR_DIVISION	GOBP_REGULATION_OF_MEIOTIC_NUCLEAR_DIVISION		30	0.166815	1.10606	0.308594	0.471575	1	1424	tags=27%, list=10%, signal=30%
GOBP_PHOSPHATIDYLINOSITOL_3_KINASE_PROTEIN_KINASE_B_SIGNAL_TRANSDUCTION	GOBP_PHOSPHATIDYLINOSITOL_3_KINASE_PROTEIN_KINASE_B_SIGNAL_TRANSDUCTION		303	0.0545285	1.10576	0.284	0.471764	1	3558	tags=30%, list=25%, signal=40%
GOBP_RESPONSE_TO_FOOD	GOBP_RESPONSE_TO_FOOD		43	0.139643	1.10572	0.30099	0.471561	1	5295	tags=51%, list=37%, signal=81%
GOBP_OLFACTORY_LOBE_DEVELOPMENT	GOBP_OLFACTORY_LOBE_DEVELOPMENT		42	0.141964	1.1055	0.325397	0.471584	1	4758	tags=48%, list=33%, signal=71%
GOBP_NEGATIVE_REGULATION_OF_POST_TRANSLATIONAL_PROTEIN_MODIFICATION	GOBP_NEGATIVE_REGULATION_OF_POST_TRANSLATIONAL_PROTEIN_MODIFICATION		87	0.1003	1.10432	0.313402	0.4731	1	10187	tags=82%, list=72%, signal=286%
GOBP_VASCULAR_TRANSPORT	GOBP_VASCULAR_TRANSPORT		23	0.186817	1.10335	0.324701	0.474339	1	2293	tags=35%, list=16%, signal=41%
GOBP_TELOMERE_CAPPING	GOBP_TELOMERE_CAPPING		36	0.149082	1.10323	0.309237	0.474236	1	8155	tags=72%, list=57%, signal=169%
GOBP_RECEPTOR_LOCALIZATION_TO_SYNAPSE	GOBP_RECEPTOR_LOCALIZATION_TO_SYNAPSE		87	0.10177	1.10316	0.329167	0.474067	1	2974	tags=31%, list=21%, signal=39%
GOBP_REGULATION_OF_KERATINOCYTE_PROLIFERATION	GOBP_REGULATION_OF_KERATINOCYTE_PROLIFERATION		49	0.136548	1.10312	0.310277	0.473833	1	4739	tags=47%, list=33%, signal=70%
GOBP_ENERGY_HOMEOSTASIS	GOBP_ENERGY_HOMEOSTASIS		89	0.0976626	1.10259	0.310924	0.474395	1	3732	tags=36%, list=26%, signal=48%
GOBP_REGULATION_OF_BEHAVIOR	GOBP_REGULATION_OF_BEHAVIOR		84	0.10186	1.10257	0.325911	0.474151	1	6516	tags=56%, list=46%, signal=103%
GOBP_FC_RECEPTOR_SIGNALING_PATHWAY	GOBP_FC_RECEPTOR_SIGNALING_PATHWAY		17	0.223048	1.10207	0.305668	0.474646	1	1850	tags=35%, list=13%, signal=41%
GOBP_NEGATIVE_REGULATION_OF_STEM_CELL_PROLIFERATION	GOBP_NEGATIVE_REGULATION_OF_STEM_CELL_PROLIFERATION		26	0.181638	1.10109	0.314465	0.475864	1	6719	tags=65%, list=47%, signal=124%
GOBP_NEGATIVE_REGULATION_OF_PROTEIN_CONTAINING_COMPLEX_DISASSEMBLY	GOBP_NEGATIVE_REGULATION_OF_PROTEIN_CONTAINING_COMPLEX_DISASSEMBLY		74	0.109209	1.10065	0.326087	0.476263	1	4988	tags=46%, list=35%, signal=70%
GOBP_MICROTUBULE_DEPOLYMERIZATION	GOBP_MICROTUBULE_DEPOLYMERIZATION		49	0.132464	1.09992	0.305927	0.477059	1	6248	tags=57%, list=44%, signal=102%
GOBP_PROTEIN_BRANCHED_POLYUBIQUITINATION	GOBP_PROTEIN_BRANCHED_POLYUBIQUITINATION		18	0.21932	1.09914	0.338742	0.478025	1	11105	tags=100%, list=78%, signal=456%
GOBP_POSITIVE_REGULATION_OF_MICROTUBULE_POLYMERIZATION_OR_DEPOLYMERIZATION	GOBP_POSITIVE_REGULATION_OF_MICROTUBULE_POLYMERIZATION_OR_DEPOLYMERIZATION		35	0.155759	1.09751	0.340385	0.480226	1	6322	tags=60%, list=44%, signal=108%
GOBP_MITOTIC_G2_DNA_DAMAGE_CHECKPOINT_SIGNALING	GOBP_MITOTIC_G2_DNA_DAMAGE_CHECKPOINT_SIGNALING		34	0.158639	1.09687	0.312369	0.480932	1	8205	tags=74%, list=58%, signal=173%
GOBP_MAMMARY_GLAND_MORPHOGENESIS	GOBP_MAMMARY_GLAND_MORPHOGENESIS		58	0.123042	1.09647	0.313253	0.481273	1	6838	tags=60%, list=48%, signal=116%
GOBP_REPRODUCTIVE_BEHAVIOR	GOBP_REPRODUCTIVE_BEHAVIOR		50	0.130513	1.09618	0.299595	0.481444	1	5260	tags=50%, list=37%, signal=79%
GOBP_POSITIVE_REGULATION_OF_CELL_MATRIX_ADHESION	GOBP_POSITIVE_REGULATION_OF_CELL_MATRIX_ADHESION		61	0.121986	1.09576	0.347826	0.481828	1	5965	tags=54%, list=42%, signal=93%
GOBP_PROTEIN_LOCALIZATION_TO_POSTSYNAPSE	GOBP_PROTEIN_LOCALIZATION_TO_POSTSYNAPSE		65	0.114174	1.09559	0.318267	0.481789	1	6259	tags=55%, list=44%, signal=98%
GOBP_LUNG_CELL_DIFFERENTIATION	GOBP_LUNG_CELL_DIFFERENTIATION		35	0.158442	1.09486	0.32681	0.48262	1	5065	tags=51%, list=36%, signal=80%
GOBP_BRAIN_MORPHOGENESIS	GOBP_BRAIN_MORPHOGENESIS		37	0.154927	1.09429	0.325142	0.483192	1	8179	tags=73%, list=58%, signal=171%
GOBP_REGULATION_OF_PROTEASOMAL_UBIQUITIN_DEPENDENT_PROTEIN_CATABOLIC_PROCESS	GOBP_REGULATION_OF_PROTEASOMAL_UBIQUITIN_DEPENDENT_PROTEIN_CATABOLIC_PROCESS		117	0.0862852	1.09359	0.329317	0.483985	1	10329	tags=81%, list=73%, signal=294%
GOBP_LIPID_EXPORT_FROM_CELL	GOBP_LIPID_EXPORT_FROM_CELL		52	0.128061	1.09349	0.328512	0.483853	1	5295	tags=50%, list=37%, signal=79%
GOBP_POSITIVE_REGULATION_OF_STRESS_FIBER_ASSEMBLY	GOBP_POSITIVE_REGULATION_OF_STRESS_FIBER_ASSEMBLY		54	0.127734	1.09342	0.341699	0.483672	1	6880	tags=61%, list=48%, signal=118%
GOBP_CHONDROCYTE_PROLIFERATION	GOBP_CHONDROCYTE_PROLIFERATION		25	0.181006	1.09326	0.343434	0.483637	1	2549	tags=36%, list=18%, signal=44%
GOBP_GAMMA_AMINOBUTYRIC_ACID_TRANSPORT	GOBP_GAMMA_AMINOBUTYRIC_ACID_TRANSPORT		18	0.213566	1.09307	0.3125	0.483628	1	916	tags=28%, list=6%, signal=30%
GOBP_INTRACELLULAR_PROTEIN_TRANSMEMBRANE_TRANSPORT	GOBP_INTRACELLULAR_PROTEIN_TRANSMEMBRANE_TRANSPORT		29	0.170886	1.09277	0.337662	0.483804	1	6891	tags=66%, list=48%, signal=127%
GOBP_MORPHOGENESIS_OF_AN_EPITHELIAL_FOLD	GOBP_MORPHOGENESIS_OF_AN_EPITHELIAL_FOLD		26	0.179798	1.09218	0.324752	0.484399	1	8386	tags=77%, list=59%, signal=187%
GOBP_NEGATIVE_REGULATION_OF_CELLULAR_SENESCENCE	GOBP_NEGATIVE_REGULATION_OF_CELLULAR_SENESCENCE		26	0.182334	1.09201	0.321721	0.484364	1	8350	tags=77%, list=59%, signal=186%
GOBP_METANEPHROS_MORPHOGENESIS	GOBP_METANEPHROS_MORPHOGENESIS		30	0.167043	1.09195	0.317172	0.484164	1	4739	tags=50%, list=33%, signal=75%
GOBP_REGULATION_OF_EXCITATORY_SYNAPSE_ASSEMBLY	GOBP_REGULATION_OF_EXCITATORY_SYNAPSE_ASSEMBLY		22	0.19261	1.09164	0.332692	0.484377	1	1789	tags=32%, list=13%, signal=36%
GOBP_REGULATION_OF_PROTEIN_KINASE_A_SIGNALING	GOBP_REGULATION_OF_PROTEIN_KINASE_A_SIGNALING		15	0.237397	1.09083	0.343866	0.485344	1	3263	tags=47%, list=23%, signal=60%
GOBP_AGGREPHAGY	GOBP_AGGREPHAGY		16	0.225554	1.09079	0.356855	0.485113	1	11016	tags=100%, list=77%, signal=443%
GOBP_EXECUTION_PHASE_OF_APOPTOSIS	GOBP_EXECUTION_PHASE_OF_APOPTOSIS		76	0.105772	1.09017	0.330693	0.485768	1	5052	tags=46%, list=36%, signal=71%
GOBP_RETICULOPHAGY	GOBP_RETICULOPHAGY		17	0.222858	1.08969	0.331349	0.48618	1	10218	tags=94%, list=72%, signal=334%
GOBP_REGULATION_OF_CELL_CYCLE_G2_M_PHASE_TRANSITION	GOBP_REGULATION_OF_CELL_CYCLE_G2_M_PHASE_TRANSITION		103	0.0932611	1.089	0.316667	0.486933	1	12213	tags=95%, list=86%, signal=669%
GOBP_AXON_ENSHEATHMENT_IN_CENTRAL_NERVOUS_SYSTEM	GOBP_AXON_ENSHEATHMENT_IN_CENTRAL_NERVOUS_SYSTEM		30	0.167806	1.08693	0.336016	0.489782	1	2358	tags=33%, list=17%, signal=40%
GOBP_BONE_TRABECULA_MORPHOGENESIS	GOBP_BONE_TRABECULA_MORPHOGENESIS		19	0.204949	1.08682	0.334783	0.489646	1	6070	tags=63%, list=43%, signal=110%
GOBP_RECEPTOR_METABOLIC_PROCESS	GOBP_RECEPTOR_METABOLIC_PROCESS		75	0.110688	1.08667	0.329435	0.489597	1	3932	tags=39%, list=28%, signal=53%
GOBP_NEGATIVE_REGULATION_OF_SMAD_PROTEIN_SIGNAL_TRANSDUCTION	GOBP_NEGATIVE_REGULATION_OF_SMAD_PROTEIN_SIGNAL_TRANSDUCTION		20	0.206179	1.08594	0.346072	0.490527	1	10581	tags=95%, list=74%, signal=371%
GOBP_EMBRYONIC_CAMERA_TYPE_EYE_MORPHOGENESIS	GOBP_EMBRYONIC_CAMERA_TYPE_EYE_MORPHOGENESIS		28	0.173964	1.08488	0.342052	0.491876	1	6672	tags=64%, list=47%, signal=121%
GOBP_POSITIVE_REGULATION_OF_RECEPTOR_MEDIATED_ENDOCYTOSIS	GOBP_POSITIVE_REGULATION_OF_RECEPTOR_MEDIATED_ENDOCYTOSIS		61	0.117549	1.08384	0.331429	0.493195	1	2764	tags=31%, list=19%, signal=38%
GOBP_REGULATION_OF_T_CELL_MEDIATED_IMMUNITY	GOBP_REGULATION_OF_T_CELL_MEDIATED_IMMUNITY		94	0.0942491	1.0838	0.351779	0.49296	1	1542	tags=20%, list=11%, signal=23%
GOBP_RESPONSE_TO_INTERLEUKIN_17	GOBP_RESPONSE_TO_INTERLEUKIN_17		23	0.188419	1.08363	0.31569	0.492928	1	7835	tags=74%, list=55%, signal=164%
GOBP_NUCLEOLUS_ORGANIZATION	GOBP_NUCLEOLUS_ORGANIZATION		19	0.208507	1.0834	0.341365	0.492987	1	5271	tags=58%, list=37%, signal=92%
GOBP_NEGATIVE_REGULATION_OF_AXONOGENESIS	GOBP_NEGATIVE_REGULATION_OF_AXONOGENESIS		54	0.126049	1.08332	0.366936	0.492818	1	4007	tags=41%, list=28%, signal=57%
GOBP_RESPONSE_TO_UV_B	GOBP_RESPONSE_TO_UV_B		21	0.198021	1.08316	0.35119	0.492805	1	3959	tags=48%, list=28%, signal=66%
GOBP_MATING_BEHAVIOR	GOBP_MATING_BEHAVIOR		41	0.142661	1.08235	0.350806	0.493705	1	5260	tags=51%, list=37%, signal=81%
GOBP_CRANIAL_SKELETAL_SYSTEM_DEVELOPMENT	GOBP_CRANIAL_SKELETAL_SYSTEM_DEVELOPMENT		73	0.108628	1.08229	0.330578	0.493508	1	4696	tags=44%, list=33%, signal=65%
GOBP_CELLULAR_RESPONSE_TO_FATTY_ACID	GOBP_CELLULAR_RESPONSE_TO_FATTY_ACID		41	0.141333	1.08208	0.352705	0.49353	1	2504	tags=32%, list=18%, signal=38%
GOBP_MOLTING_CYCLE	GOBP_MOLTING_CYCLE		122	0.0821602	1.08136	0.350622	0.494369	1	8399	tags=67%, list=59%, signal=163%
GOBP_POSITIVE_REGULATION_OF_AMIDE_METABOLIC_PROCESS	GOBP_POSITIVE_REGULATION_OF_AMIDE_METABOLIC_PROCESS		29	0.165654	1.08128	0.342857	0.494192	1	7946	tags=72%, list=56%, signal=164%
GOBP_MICROGLIA_DIFFERENTIATION	GOBP_MICROGLIA_DIFFERENTIATION		16	0.224186	1.08107	0.332685	0.49426	1	8369	tags=81%, list=59%, signal=197%
GOBP_POSITIVE_REGULATION_OF_NERVOUS_SYSTEM_PROCESS	GOBP_POSITIVE_REGULATION_OF_NERVOUS_SYSTEM_PROCESS		38	0.148382	1.0809	0.334661	0.494212	1	5005	tags=50%, list=35%, signal=77%
GOBP_NEGATIVE_REGULATION_OF_DNA_REPAIR	GOBP_NEGATIVE_REGULATION_OF_DNA_REPAIR		27	0.173939	1.07892	0.34375	0.497046	1	10171	tags=89%, list=72%, signal=312%
GOBP_CARDIAC_CONDUCTION_SYSTEM_DEVELOPMENT	GOBP_CARDIAC_CONDUCTION_SYSTEM_DEVELOPMENT		19	0.202603	1.07828	0.342	0.497721	1	864	tags=26%, list=6%, signal=28%
GOBP_CELLULAR_RESPONSE_TO_KETONE	GOBP_CELLULAR_RESPONSE_TO_KETONE		112	0.0895888	1.0778	0.362	0.498199	1	3433	tags=33%, list=24%, signal=43%
GOBP_REGULATION_OF_LIPID_LOCALIZATION	GOBP_REGULATION_OF_LIPID_LOCALIZATION		169	0.0722599	1.07689	0.366738	0.499297	1	3191	tags=30%, list=22%, signal=38%
GOBP_REGULATION_OF_MAP_KINASE_ACTIVITY	GOBP_REGULATION_OF_MAP_KINASE_ACTIVITY		150	0.07474	1.07676	0.353635	0.499196	1	8428	tags=67%, list=59%, signal=162%
GOBP_DOPAMINE_SECRETION	GOBP_DOPAMINE_SECRETION		29	0.16639	1.07646	0.327902	0.499363	1	2051	tags=31%, list=14%, signal=36%
GOBP_ATRIAL_SEPTUM_DEVELOPMENT	GOBP_ATRIAL_SEPTUM_DEVELOPMENT		21	0.198327	1.07632	0.365201	0.499285	1	8695	tags=81%, list=61%, signal=208%
GOBP_CARBOHYDRATE_DERIVATIVE_TRANSPORT	GOBP_CARBOHYDRATE_DERIVATIVE_TRANSPORT		79	0.100917	1.07578	0.357143	0.499847	1	912	tags=16%, list=6%, signal=17%
GOBP_AXON_REGENERATION	GOBP_AXON_REGENERATION		57	0.119055	1.07431	0.351812	0.501807	1	4051	tags=40%, list=28%, signal=56%
GOBP_REGULATION_OF_DENDRITIC_SPINE_MORPHOGENESIS	GOBP_REGULATION_OF_DENDRITIC_SPINE_MORPHOGENESIS		60	0.113875	1.07382	0.323643	0.502282	1	6682	tags=58%, list=47%, signal=110%
GOBP_HEART_VALVE_MORPHOGENESIS	GOBP_HEART_VALVE_MORPHOGENESIS		56	0.124648	1.07362	0.352826	0.50232	1	9407	tags=79%, list=66%, signal=231%
GOBP_CELL_SURFACE_PATTERN_RECOGNITION_RECEPTOR_SIGNALING_PATHWAY	GOBP_CELL_SURFACE_PATTERN_RECOGNITION_RECEPTOR_SIGNALING_PATHWAY		74	0.107765	1.07243	0.339357	0.503877	1	6738	tags=58%, list=47%, signal=110%
GOBP_REGULATION_OF_PODOSOME_ASSEMBLY	GOBP_REGULATION_OF_PODOSOME_ASSEMBLY		16	0.221647	1.0718	0.353183	0.504571	1	3961	tags=50%, list=28%, signal=69%
GOBP_PHOSPHOLIPID_CATABOLIC_PROCESS	GOBP_PHOSPHOLIPID_CATABOLIC_PROCESS		51	0.130228	1.07169	0.382643	0.504431	1	2894	tags=33%, list=20%, signal=42%
GOBP_CELLULAR_RESPONSE_TO_GAMMA_RADIATION	GOBP_CELLULAR_RESPONSE_TO_GAMMA_RADIATION		26	0.17633	1.0715	0.353175	0.504466	1	11717	tags=100%, list=82%, signal=567%
GOBP_POSITIVE_REGULATION_OF_PROTEIN_SERINE_THREONINE_KINASE_ACTIVITY	GOBP_POSITIVE_REGULATION_OF_PROTEIN_SERINE_THREONINE_KINASE_ACTIVITY		141	0.0776717	1.06949	0.351812	0.507331	1	3444	tags=32%, list=24%, signal=42%
GOBP_REGULATION_OF_GLIAL_CELL_PROLIFERATION	GOBP_REGULATION_OF_GLIAL_CELL_PROLIFERATION		53	0.123022	1.06882	0.359841	0.508116	1	5769	tags=53%, list=41%, signal=89%
GOBP_NEGATIVE_REGULATION_OF_ORGANELLE_ORGANIZATION	GOBP_NEGATIVE_REGULATION_OF_ORGANELLE_ORGANIZATION		334	0.0498931	1.06857	0.358531	0.50817	1	12633	tags=94%, list=89%, signal=820%
GOBP_NEGATIVE_REGULATION_OF_PROTEIN_UBIQUITINATION	GOBP_NEGATIVE_REGULATION_OF_PROTEIN_UBIQUITINATION		74	0.108779	1.06842	0.357708	0.508091	1	10375	tags=84%, list=73%, signal=308%
GOBP_NEGATIVE_REGULATION_OF_BMP_SIGNALING_PATHWAY	GOBP_NEGATIVE_REGULATION_OF_BMP_SIGNALING_PATHWAY		51	0.128885	1.06688	0.347744	0.510197	1	6538	tags=59%, list=46%, signal=108%
GOBP_REGULATION_OF_FEEDING_BEHAVIOR	GOBP_REGULATION_OF_FEEDING_BEHAVIOR		31	0.160774	1.06613	0.337786	0.511109	1	4140	tags=45%, list=29%, signal=64%
GOBP_POSITIVE_REGULATION_OF_MITOCHONDRIAL_FISSION	GOBP_POSITIVE_REGULATION_OF_MITOCHONDRIAL_FISSION		19	0.203919	1.06596	0.340909	0.511073	1	9827	tags=89%, list=69%, signal=289%
GOBP_REGULATION_OF_MYELINATION	GOBP_REGULATION_OF_MYELINATION		53	0.123449	1.06568	0.34714	0.511218	1	4958	tags=47%, list=35%, signal=72%
GOBP_COLLAGEN_BIOSYNTHETIC_PROCESS	GOBP_COLLAGEN_BIOSYNTHETIC_PROCESS		59	0.117909	1.06565	0.367589	0.510978	1	11345	tags=92%, list=80%, signal=451%
GOBP_SKIN_EPIDERMIS_DEVELOPMENT	GOBP_SKIN_EPIDERMIS_DEVELOPMENT		150	0.0751181	1.06476	0.349609	0.512068	1	7285	tags=59%, list=51%, signal=119%
GOBP_CELLULAR_RESPONSE_TO_ARSENIC_CONTAINING_SUBSTANCE	GOBP_CELLULAR_RESPONSE_TO_ARSENIC_CONTAINING_SUBSTANCE		18	0.209666	1.06445	0.353516	0.512247	1	9662	tags=89%, list=68%, signal=277%
GOBP_HINDLIMB_MORPHOGENESIS	GOBP_HINDLIMB_MORPHOGENESIS		39	0.142906	1.06417	0.364754	0.512378	1	2348	tags=31%, list=17%, signal=37%
GOBP_PROTEIN_INSERTION_INTO_ER_MEMBRANE	GOBP_PROTEIN_INSERTION_INTO_ER_MEMBRANE		15	0.233901	1.0639	0.372188	0.512503	1	8053	tags=80%, list=57%, signal=184%
GOBP_INTRACELLULAR_MRNA_LOCALIZATION	GOBP_INTRACELLULAR_MRNA_LOCALIZATION		15	0.226003	1.06349	0.390196	0.512845	1	5321	tags=60%, list=37%, signal=96%
GOBP_INTERFERON_MEDIATED_SIGNALING_PATHWAY	GOBP_INTERFERON_MEDIATED_SIGNALING_PATHWAY		80	0.0997525	1.06332	0.333333	0.5128	1	7121	tags=60%, list=50%, signal=120%
GOBP_REGULATION_OF_CARDIAC_MUSCLE_CELL_PROLIFERATION	GOBP_REGULATION_OF_CARDIAC_MUSCLE_CELL_PROLIFERATION		48	0.130668	1.06289	0.357422	0.513205	1	4665	tags=46%, list=33%, signal=68%
GOBP_POSITIVE_REGULATION_OF_FILOPODIUM_ASSEMBLY	GOBP_POSITIVE_REGULATION_OF_FILOPODIUM_ASSEMBLY		29	0.168206	1.06216	0.321293	0.514028	1	3006	tags=38%, list=21%, signal=48%
GOBP_NEGATIVE_REGULATION_OF_NEURON_APOPTOTIC_PROCESS	GOBP_NEGATIVE_REGULATION_OF_NEURON_APOPTOTIC_PROCESS		193	0.067807	1.06068	0.382643	0.516102	1	2732	tags=26%, list=19%, signal=32%
GOBP_POSITIVE_REGULATION_OF_INTERLEUKIN_6_PRODUCTION	GOBP_POSITIVE_REGULATION_OF_INTERLEUKIN_6_PRODUCTION		94	0.0935111	1.06019	0.370297	0.516646	1	1855	tags=22%, list=13%, signal=26%
GOBP_NEGATIVE_REGULATION_OF_STEROID_METABOLIC_PROCESS	GOBP_NEGATIVE_REGULATION_OF_STEROID_METABOLIC_PROCESS		25	0.177484	1.06002	0.356994	0.516621	1	2599	tags=36%, list=18%, signal=44%
GOBP_DENDRITIC_CELL_CYTOKINE_PRODUCTION	GOBP_DENDRITIC_CELL_CYTOKINE_PRODUCTION		16	0.219095	1.05968	0.353877	0.516858	1	442	tags=25%, list=3%, signal=26%
GOBP_MACROMOLECULE_DEACYLATION	GOBP_MACROMOLECULE_DEACYLATION		50	0.127664	1.05965	0.351456	0.516604	1	8429	tags=72%, list=59%, signal=176%
GOBP_REGULATION_OF_HEMATOPOIETIC_STEM_CELL_PROLIFERATION	GOBP_REGULATION_OF_HEMATOPOIETIC_STEM_CELL_PROLIFERATION		17	0.211829	1.05962	0.383234	0.516344	1	6192	tags=65%, list=44%, signal=114%
GOBP_WOUND_HEALING_SPREADING_OF_EPIDERMAL_CELLS	GOBP_WOUND_HEALING_SPREADING_OF_EPIDERMAL_CELLS		20	0.197155	1.05952	0.368015	0.516211	1	8576	tags=80%, list=60%, signal=201%
GOBP_REGULATION_OF_PLATELET_AGGREGATION	GOBP_REGULATION_OF_PLATELET_AGGREGATION		27	0.168454	1.05936	0.38125	0.516154	1	2875	tags=37%, list=20%, signal=46%
GOBP_RADIAL_GLIAL_CELL_DIFFERENTIATION	GOBP_RADIAL_GLIAL_CELL_DIFFERENTIATION		20	0.199468	1.0593	0.376984	0.515956	1	6410	tags=65%, list=45%, signal=118%
GOBP_REGULATION_OF_GLYCOGEN_BIOSYNTHETIC_PROCESS	GOBP_REGULATION_OF_GLYCOGEN_BIOSYNTHETIC_PROCESS		33	0.15282	1.05916	0.346899	0.51591	1	3433	tags=39%, list=24%, signal=52%
GOBP_POSITIVE_REGULATION_OF_CELL_MIGRATION_INVOLVED_IN_SPROUTING_ANGIOGENESIS	GOBP_POSITIVE_REGULATION_OF_CELL_MIGRATION_INVOLVED_IN_SPROUTING_ANGIOGENESIS		21	0.191724	1.05875	0.353635	0.516289	1	6080	tags=62%, list=43%, signal=108%
GOBP_REGULATION_OF_FIBROBLAST_MIGRATION	GOBP_REGULATION_OF_FIBROBLAST_MIGRATION		44	0.135682	1.05871	0.382979	0.516044	1	10034	tags=84%, list=71%, signal=285%
GOBP_REGULATION_OF_OLIGODENDROCYTE_DIFFERENTIATION	GOBP_REGULATION_OF_OLIGODENDROCYTE_DIFFERENTIATION		45	0.1318	1.058	0.372093	0.516857	1	3819	tags=40%, list=27%, signal=55%
GOBP_COPPER_ION_HOMEOSTASIS	GOBP_COPPER_ION_HOMEOSTASIS		18	0.205238	1.05763	0.364017	0.517163	1	11305	tags=100%, list=79%, signal=487%
GOBP_SUCKLING_BEHAVIOR	GOBP_SUCKLING_BEHAVIOR		17	0.213859	1.05755	0.384462	0.517005	1	1144	tags=29%, list=8%, signal=32%
GOBP_INFLAMMATORY_RESPONSE_TO_WOUNDING	GOBP_INFLAMMATORY_RESPONSE_TO_WOUNDING		32	0.158415	1.05741	0.371316	0.516917	1	8417	tags=75%, list=59%, signal=183%
GOBP_NEGATIVE_REGULATION_OF_TELOMERE_MAINTENANCE_VIA_TELOMERASE	GOBP_NEGATIVE_REGULATION_OF_TELOMERE_MAINTENANCE_VIA_TELOMERASE		17	0.217606	1.05691	0.362919	0.517436	1	7783	tags=76%, list=55%, signal=169%
GOBP_JNK_CASCADE	GOBP_JNK_CASCADE		193	0.0664932	1.05684	0.381238	0.517249	1	5182	tags=43%, list=36%, signal=67%
GOBP_POSITIVE_REGULATION_OF_PEPTIDYL_THREONINE_PHOSPHORYLATION	GOBP_POSITIVE_REGULATION_OF_PEPTIDYL_THREONINE_PHOSPHORYLATION		25	0.178447	1.05645	0.388031	0.517544	1	3723	tags=44%, list=26%, signal=59%
GOBP_PROSTANOID_BIOSYNTHETIC_PROCESS	GOBP_PROSTANOID_BIOSYNTHETIC_PROCESS		30	0.162465	1.05639	0.364948	0.517364	1	5278	tags=53%, list=37%, signal=85%
GOBP_NEGATIVE_REGULATION_OF_TYPE_I_INTERFERON_PRODUCTION	GOBP_NEGATIVE_REGULATION_OF_TYPE_I_INTERFERON_PRODUCTION		38	0.142079	1.0553	0.389328	0.518735	1	9211	tags=79%, list=65%, signal=223%
GOBP_RESPONSE_TO_TYPE_I_INTERFERON	GOBP_RESPONSE_TO_TYPE_I_INTERFERON		69	0.106979	1.05495	0.365112	0.518972	1	8584	tags=71%, list=60%, signal=178%
GOBP_RESPONSE_TO_IONIZING_RADIATION	GOBP_RESPONSE_TO_IONIZING_RADIATION		131	0.0793081	1.05492	0.361925	0.518724	1	6372	tags=53%, list=45%, signal=95%
GOBP_POSITIVE_REGULATION_OF_D_GLUCOSE_TRANSMEMBRANE_TRANSPORT	GOBP_POSITIVE_REGULATION_OF_D_GLUCOSE_TRANSMEMBRANE_TRANSPORT		44	0.135804	1.05475	0.371951	0.518683	1	4861	tags=48%, list=34%, signal=72%
GOBP_MONOCYTE_DIFFERENTIATION	GOBP_MONOCYTE_DIFFERENTIATION		35	0.149032	1.05461	0.377593	0.518624	1	8449	tags=74%, list=59%, signal=183%
GOBP_POSITIVE_REGULATION_OF_SMAD_PROTEIN_SIGNAL_TRANSDUCTION	GOBP_POSITIVE_REGULATION_OF_SMAD_PROTEIN_SIGNAL_TRANSDUCTION		38	0.143372	1.05342	0.36961	0.520209	1	6573	tags=61%, list=46%, signal=112%
GOBP_POST_TRANSCRIPTIONAL_GENE_SILENCING	GOBP_POST_TRANSCRIPTIONAL_GENE_SILENCING		55	0.118761	1.05336	0.390688	0.520004	1	9952	tags=82%, list=70%, signal=272%
GOBP_RESPONSE_TO_PROSTAGLANDIN	GOBP_RESPONSE_TO_PROSTAGLANDIN		29	0.159531	1.05299	0.377691	0.520312	1	5581	tags=55%, list=39%, signal=91%
GOBP_REGULATION_OF_PROTEIN_POLYUBIQUITINATION	GOBP_REGULATION_OF_PROTEIN_POLYUBIQUITINATION		30	0.164177	1.05292	0.364389	0.520126	1	9520	tags=83%, list=67%, signal=252%
GOBP_EXPLORATION_BEHAVIOR	GOBP_EXPLORATION_BEHAVIOR		40	0.139676	1.05273	0.358051	0.520137	1	8684	tags=75%, list=61%, signal=192%
GOBP_CARBOHYDRATE_BIOSYNTHETIC_PROCESS	GOBP_CARBOHYDRATE_BIOSYNTHETIC_PROCESS		190	0.0646531	1.05263	0.38015	0.520009	1	3433	tags=31%, list=24%, signal=40%
GOBP_OLIGODENDROCYTE_DEVELOPMENT	GOBP_OLIGODENDROCYTE_DEVELOPMENT		52	0.12303	1.05209	0.381818	0.52055	1	2358	tags=29%, list=17%, signal=34%
GOBP_NEGATIVE_REGULATION_OF_INTRACELLULAR_TRANSPORT	GOBP_NEGATIVE_REGULATION_OF_INTRACELLULAR_TRANSPORT		57	0.116888	1.05186	0.358527	0.520606	1	9820	tags=81%, list=69%, signal=260%
GOBP_POSITIVE_REGULATION_OF_CELL_MORPHOGENESIS	GOBP_POSITIVE_REGULATION_OF_CELL_MORPHOGENESIS		65	0.113124	1.05131	0.383197	0.521213	1	7149	tags=62%, list=50%, signal=123%
GOBP_REGULATION_OF_DOPAMINE_SECRETION	GOBP_REGULATION_OF_DOPAMINE_SECRETION		22	0.184863	1.05117	0.376278	0.521131	1	1899	tags=32%, list=13%, signal=37%
GOBP_ADULT_BEHAVIOR	GOBP_ADULT_BEHAVIOR		154	0.0732404	1.05065	0.38055	0.521649	1	4140	tags=36%, list=29%, signal=51%
GOBP_ENDODERM_FORMATION	GOBP_ENDODERM_FORMATION		50	0.126259	1.04889	0.37037	0.524177	1	9871	tags=82%, list=69%, signal=267%
GOBP_ACROSOME_REACTION	GOBP_ACROSOME_REACTION		23	0.182922	1.04794	0.381339	0.525427	1	1730	tags=30%, list=12%, signal=35%
GOBP_PERIPHERAL_NERVOUS_SYSTEM_DEVELOPMENT	GOBP_PERIPHERAL_NERVOUS_SYSTEM_DEVELOPMENT		76	0.102397	1.04676	0.366255	0.526957	1	11836	tags=93%, list=83%, signal=554%
GOBP_RESPONSE_TO_PROGESTERONE	GOBP_RESPONSE_TO_PROGESTERONE		42	0.137954	1.04642	0.390756	0.527226	1	8878	tags=76%, list=62%, signal=202%
GOBP_POSITIVE_REGULATION_OF_RECEPTOR_CLUSTERING	GOBP_POSITIVE_REGULATION_OF_RECEPTOR_CLUSTERING		17	0.211854	1.04573	0.37247	0.528016	1	2009	tags=35%, list=14%, signal=41%
GOBP_POSITIVE_REGULATION_OF_GLYCOPROTEIN_METABOLIC_PROCESS	GOBP_POSITIVE_REGULATION_OF_GLYCOPROTEIN_METABOLIC_PROCESS		21	0.191838	1.04471	0.38755	0.529353	1	4724	tags=52%, list=33%, signal=78%
GOBP_NEURON_CELLULAR_HOMEOSTASIS	GOBP_NEURON_CELLULAR_HOMEOSTASIS		74	0.102726	1.04462	0.351579	0.529195	1	4311	tags=41%, list=30%, signal=58%
GOBP_CELL_PROLIFERATION_INVOLVED_IN_HEART_MORPHOGENESIS	GOBP_CELL_PROLIFERATION_INVOLVED_IN_HEART_MORPHOGENESIS		20	0.191856	1.0442	0.381633	0.529563	1	5096	tags=55%, list=36%, signal=86%
GOBP_CELLULAR_RESPONSE_TO_HYPOXIA	GOBP_CELLULAR_RESPONSE_TO_HYPOXIA		139	0.0755365	1.04304	0.386588	0.531095	1	4460	tags=39%, list=31%, signal=56%
GOBP_ACTIVATION_OF_PROTEIN_KINASE_ACTIVITY	GOBP_ACTIVATION_OF_PROTEIN_KINASE_ACTIVITY		59	0.115621	1.04228	0.390424	0.532014	1	8485	tags=71%, list=60%, signal=176%
GOBP_REGULATION_OF_DNA_CATABOLIC_PROCESS	GOBP_REGULATION_OF_DNA_CATABOLIC_PROCESS		15	0.22384	1.04201	0.394584	0.532127	1	9144	tags=87%, list=64%, signal=243%
GOBP_POSITIVE_REGULATION_OF_JUN_KINASE_ACTIVITY	GOBP_POSITIVE_REGULATION_OF_JUN_KINASE_ACTIVITY		48	0.127587	1.04168	0.379648	0.532357	1	9449	tags=79%, list=66%, signal=235%
GOBP_AMYLOID_FIBRIL_FORMATION	GOBP_AMYLOID_FIBRIL_FORMATION		31	0.158124	1.04077	0.405941	0.533525	1	10600	tags=90%, list=75%, signal=354%
GOBP_NEGATIVE_REGULATION_OF_DEVELOPMENTAL_GROWTH	GOBP_NEGATIVE_REGULATION_OF_DEVELOPMENTAL_GROWTH		106	0.0875992	1.04046	0.37451	0.533727	1	6678	tags=56%, list=47%, signal=104%
GOBP_NUCLEUS_LOCALIZATION	GOBP_NUCLEUS_LOCALIZATION		41	0.138562	1.03769	0.412574	0.537861	1	3237	tags=37%, list=23%, signal=47%
GOBP_REGULATION_OF_CELLULAR_RESPONSE_TO_OXIDATIVE_STRESS	GOBP_REGULATION_OF_CELLULAR_RESPONSE_TO_OXIDATIVE_STRESS		26	0.170493	1.03721	0.375984	0.538351	1	9612	tags=85%, list=68%, signal=261%
GOBP_IMMATURE_B_CELL_DIFFERENTIATION	GOBP_IMMATURE_B_CELL_DIFFERENTIATION		17	0.211577	1.03713	0.403226	0.538181	1	3686	tags=47%, list=26%, signal=63%
GOBP_RESPONSE_TO_TUMOR_NECROSIS_FACTOR	GOBP_RESPONSE_TO_TUMOR_NECROSIS_FACTOR		195	0.0648576	1.03507	0.392505	0.541219	1	3465	tags=31%, list=24%, signal=40%
GOBP_REGULATION_OF_CELL_SIZE	GOBP_REGULATION_OF_CELL_SIZE		194	0.0641759	1.03493	0.376782	0.541141	1	6136	tags=49%, list=43%, signal=86%
GOBP_NEGATIVE_REGULATION_OF_ASTROCYTE_DIFFERENTIATION	GOBP_NEGATIVE_REGULATION_OF_ASTROCYTE_DIFFERENTIATION		19	0.195662	1.03488	0.391732	0.540926	1	3208	tags=42%, list=23%, signal=54%
GOBP_RESPONSE_TO_ETHANOL	GOBP_RESPONSE_TO_ETHANOL		127	0.0766865	1.03442	0.389558	0.541411	1	4517	tags=39%, list=32%, signal=57%
GOBP_DETECTION_OF_MECHANICAL_STIMULUS_INVOLVED_IN_SENSORY_PERCEPTION_OF_PAIN	GOBP_DETECTION_OF_MECHANICAL_STIMULUS_INVOLVED_IN_SENSORY_PERCEPTION_OF_PAIN		16	0.218651	1.03419	0.408818	0.541489	1	6670	tags=69%, list=47%, signal=129%
GOBP_POSITIVE_REGULATION_OF_G1_S_TRANSITION_OF_MITOTIC_CELL_CYCLE	GOBP_POSITIVE_REGULATION_OF_G1_S_TRANSITION_OF_MITOTIC_CELL_CYCLE		45	0.13196	1.03401	0.404715	0.541457	1	7609	tags=67%, list=54%, signal=143%
GOBP_REGULATION_OF_MESENCHYMAL_CELL_PROLIFERATION	GOBP_REGULATION_OF_MESENCHYMAL_CELL_PROLIFERATION		43	0.134388	1.0338	0.395397	0.541512	1	8346	tags=72%, list=59%, signal=174%
GOBP_MITOCHONDRIAL_FISSION	GOBP_MITOCHONDRIAL_FISSION		42	0.136485	1.03365	0.423529	0.541486	1	11269	tags=93%, list=79%, signal=446%
GOBP_NOREPINEPHRINE_METABOLIC_PROCESS	GOBP_NOREPINEPHRINE_METABOLIC_PROCESS		15	0.217833	1.03241	0.404255	0.543181	1	4489	tags=53%, list=32%, signal=78%
GOBP_POSITIVE_REGULATION_OF_RNA_SPLICING	GOBP_POSITIVE_REGULATION_OF_RNA_SPLICING		46	0.129932	1.032	0.401575	0.543541	1	9905	tags=83%, list=70%, signal=271%
GOBP_REGULATION_OF_POSTSYNAPTIC_SPECIALIZATION_ASSEMBLY	GOBP_REGULATION_OF_POSTSYNAPTIC_SPECIALIZATION_ASSEMBLY		23	0.178767	1.03182	0.386266	0.543523	1	1789	tags=30%, list=13%, signal=35%
GOBP_NEGATIVE_REGULATION_OF_COLD_INDUCED_THERMOGENESIS	GOBP_NEGATIVE_REGULATION_OF_COLD_INDUCED_THERMOGENESIS		45	0.129549	1.03139	0.408284	0.543907	1	5115	tags=49%, list=36%, signal=76%
GOBP_INTRACELLULAR_ZINC_ION_HOMEOSTASIS	GOBP_INTRACELLULAR_ZINC_ION_HOMEOSTASIS		28	0.161954	1.03096	0.407186	0.5443	1	4303	tags=46%, list=30%, signal=66%
GOBP_NEGATIVE_REGULATION_OF_ANDROGEN_RECEPTOR_SIGNALING_PATHWAY	GOBP_NEGATIVE_REGULATION_OF_ANDROGEN_RECEPTOR_SIGNALING_PATHWAY		15	0.221019	1.03011	0.425447	0.545387	1	8236	tags=80%, list=58%, signal=190%
GOBP_HEART_VALVE_FORMATION	GOBP_HEART_VALVE_FORMATION		16	0.213508	1.02909	0.395112	0.546648	1	2299	tags=38%, list=16%, signal=45%
GOBP_DETECTION_OF_STIMULUS_INVOLVED_IN_SENSORY_PERCEPTION	GOBP_DETECTION_OF_STIMULUS_INVOLVED_IN_SENSORY_PERCEPTION		81	0.0945475	1.02722	0.395445	0.549405	1	3578	tags=35%, list=25%, signal=46%
GOBP_L_GLUTAMATE_IMPORT_ACROSS_PLASMA_MEMBRANE	GOBP_L_GLUTAMATE_IMPORT_ACROSS_PLASMA_MEMBRANE		15	0.215228	1.02711	0.39499	0.549277	1	4526	tags=53%, list=32%, signal=78%
GOBP_CELL_FATE_COMMITMENT	GOBP_CELL_FATE_COMMITMENT		258	0.0552901	1.02694	0.428571	0.549265	1	4739	tags=39%, list=33%, signal=57%
GOBP_INTRACELLULAR_STEROL_TRANSPORT	GOBP_INTRACELLULAR_STEROL_TRANSPORT		31	0.158335	1.02622	0.398551	0.550078	1	10597	tags=90%, list=75%, signal=354%
GOBP_ODONTOGENESIS	GOBP_ODONTOGENESIS		119	0.0808992	1.02514	0.408478	0.551483	1	8538	tags=68%, list=60%, signal=169%
GOBP_NEGATIVE_REGULATION_OF_NON_CANONICAL_NF_KAPPAB_SIGNAL_TRANSDUCTION	GOBP_NEGATIVE_REGULATION_OF_NON_CANONICAL_NF_KAPPAB_SIGNAL_TRANSDUCTION		23	0.180087	1.02389	0.411523	0.553169	1	7335	tags=70%, list=52%, signal=143%
GOBP_POSITIVE_REGULATION_OF_T_CELL_MEDIATED_IMMUNITY	GOBP_POSITIVE_REGULATION_OF_T_CELL_MEDIATED_IMMUNITY		65	0.107374	1.02378	0.431559	0.553069	1	1542	tags=22%, list=11%, signal=24%
GOBP_GLYCEROLIPID_BIOSYNTHETIC_PROCESS	GOBP_GLYCEROLIPID_BIOSYNTHETIC_PROCESS		195	0.0637494	1.02346	0.431138	0.553287	1	12159	tags=92%, list=86%, signal=624%
GOBP_CELLULAR_RESPONSE_TO_IONIZING_RADIATION	GOBP_CELLULAR_RESPONSE_TO_IONIZING_RADIATION		68	0.10404	1.02329	0.388655	0.553252	1	11911	tags=94%, list=84%, signal=577%
GOBP_NEUROTROPHIN_SIGNALING_PATHWAY	GOBP_NEUROTROPHIN_SIGNALING_PATHWAY		45	0.130253	1.02316	0.420082	0.553166	1	4789	tags=47%, list=34%, signal=70%
GOBP_DETECTION_OF_TEMPERATURE_STIMULUS	GOBP_DETECTION_OF_TEMPERATURE_STIMULUS		24	0.173599	1.02218	0.39596	0.554407	1	5830	tags=58%, list=41%, signal=99%
GOBP_POLY_A_PLUS_MRNA_EXPORT_FROM_NUCLEUS	GOBP_POLY_A_PLUS_MRNA_EXPORT_FROM_NUCLEUS		21	0.187297	1.02207	0.418947	0.55427	1	10206	tags=90%, list=72%, signal=320%
GOBP_EXTRINSIC_APOPTOTIC_SIGNALING_PATHWAY_VIA_DEATH_DOMAIN_RECEPTORS	GOBP_EXTRINSIC_APOPTOTIC_SIGNALING_PATHWAY_VIA_DEATH_DOMAIN_RECEPTORS		77	0.100793	1.02206	0.410058	0.553985	1	9470	tags=77%, list=67%, signal=228%
GOBP_POSITIVE_REGULATION_OF_DNA_DAMAGE_RESPONSE_SIGNAL_TRANSDUCTION_BY_P53_CLASS_MEDIATOR	GOBP_POSITIVE_REGULATION_OF_DNA_DAMAGE_RESPONSE_SIGNAL_TRANSDUCTION_BY_P53_CLASS_MEDIATOR		17	0.205742	1.01864	0.418288	0.559259	1	7115	tags=71%, list=50%, signal=141%
GOBP_ADRENERGIC_RECEPTOR_SIGNALING_PATHWAY	GOBP_ADRENERGIC_RECEPTOR_SIGNALING_PATHWAY		26	0.170174	1.01856	0.428571	0.559088	1	3053	tags=38%, list=21%, signal=49%
GOBP_CELL_CYCLE_G1_S_PHASE_TRANSITION	GOBP_CELL_CYCLE_G1_S_PHASE_TRANSITION		232	0.0570331	1.01735	0.432381	0.560774	1	12564	tags=94%, list=88%, signal=793%
GOBP_POSITIVE_REGULATION_OF_ICOSANOID_SECRETION	GOBP_POSITIVE_REGULATION_OF_ICOSANOID_SECRETION		20	0.190518	1.01657	0.414062	0.561718	1	5115	tags=55%, list=36%, signal=86%
GOBP_MODIFICATION_OF_POSTSYNAPTIC_ACTIN_CYTOSKELETON	GOBP_MODIFICATION_OF_POSTSYNAPTIC_ACTIN_CYTOSKELETON		25	0.166954	1.01647	0.404124	0.561585	1	4455	tags=48%, list=31%, signal=70%
GOBP_POSITIVE_REGULATION_OF_MICROTUBULE_POLYMERIZATION	GOBP_POSITIVE_REGULATION_OF_MICROTUBULE_POLYMERIZATION		30	0.155704	1.01634	0.420949	0.561501	1	6322	tags=60%, list=44%, signal=108%
GOBP_NEGATIVE_REGULATION_OF_SMOOTH_MUSCLE_CELL_MIGRATION	GOBP_NEGATIVE_REGULATION_OF_SMOOTH_MUSCLE_CELL_MIGRATION		37	0.144523	1.01633	0.416842	0.561208	1	3330	tags=38%, list=23%, signal=49%
GOBP_NEGATIVE_REGULATION_OF_AXON_EXTENSION	GOBP_NEGATIVE_REGULATION_OF_AXON_EXTENSION		35	0.143038	1.01604	0.424603	0.561382	1	2033	tags=29%, list=14%, signal=33%
GOBP_PURINE_CONTAINING_COMPOUND_TRANSMEMBRANE_TRANSPORT	GOBP_PURINE_CONTAINING_COMPOUND_TRANSMEMBRANE_TRANSPORT		32	0.154898	1.01597	0.385827	0.561178	1	912	tags=22%, list=6%, signal=23%
GOBP_RHYTHMIC_PROCESS	GOBP_RHYTHMIC_PROCESS		295	0.0517106	1.01576	0.415686	0.561207	1	5835	tags=46%, list=41%, signal=77%
GOBP_REGULATION_OF_LONG_TERM_SYNAPTIC_POTENTIATION	GOBP_REGULATION_OF_LONG_TERM_SYNAPTIC_POTENTIATION		50	0.120905	1.01559	0.434	0.561154	1	5965	tags=54%, list=42%, signal=93%
GOBP_CELL_MIGRATION_IN_HINDBRAIN	GOBP_CELL_MIGRATION_IN_HINDBRAIN		21	0.185879	1.01547	0.416185	0.561054	1	6163	tags=62%, list=43%, signal=109%
GOBP_GAP_JUNCTION_ASSEMBLY	GOBP_GAP_JUNCTION_ASSEMBLY		16	0.213508	1.01535	0.410609	0.560947	1	2299	tags=38%, list=16%, signal=45%
GOBP_CLATHRIN_COAT_ASSEMBLY	GOBP_CLATHRIN_COAT_ASSEMBLY		22	0.181725	1.0146	0.399209	0.561848	1	5822	tags=59%, list=41%, signal=100%
GOBP_CELLULAR_RESPONSE_TO_NUTRIENT	GOBP_CELLULAR_RESPONSE_TO_NUTRIENT		51	0.121055	1.0142	0.423828	0.562193	1	8322	tags=71%, list=59%, signal=170%
GOBP_CELLULAR_RESPONSE_TO_PH	GOBP_CELLULAR_RESPONSE_TO_PH		20	0.190149	1.01386	0.438669	0.562439	1	1565	tags=30%, list=11%, signal=34%
GOBP_MYOBLAST_PROLIFERATION	GOBP_MYOBLAST_PROLIFERATION		29	0.154307	1.01316	0.413662	0.563302	1	4184	tags=45%, list=29%, signal=63%
GOBP_ENDOTHELIAL_CELL_CHEMOTAXIS	GOBP_ENDOTHELIAL_CELL_CHEMOTAXIS		30	0.156954	1.01286	0.410101	0.56348	1	2512	tags=33%, list=18%, signal=40%
GOBP_ESTABLISHMENT_OF_PROTEIN_LOCALIZATION_TO_MEMBRANE	GOBP_ESTABLISHMENT_OF_PROTEIN_LOCALIZATION_TO_MEMBRANE		217	0.0595784	1.01202	0.42562	0.564548	1	6439	tags=51%, list=45%, signal=92%
GOBP_RESPONSE_TO_GLUCAGON	GOBP_RESPONSE_TO_GLUCAGON		22	0.177244	1.01183	0.391213	0.564532	1	3300	tags=41%, list=23%, signal=53%
GOBP_REGULATION_OF_STEROID_METABOLIC_PROCESS	GOBP_REGULATION_OF_STEROID_METABOLIC_PROCESS		113	0.0830226	1.01167	0.435514	0.564466	1	3610	tags=34%, list=25%, signal=45%
GOBP_POSITIVE_REGULATION_OF_EMBRYONIC_DEVELOPMENT	GOBP_POSITIVE_REGULATION_OF_EMBRYONIC_DEVELOPMENT		19	0.192215	1.01081	0.415896	0.565609	1	1760	tags=32%, list=12%, signal=36%
GOBP_MIRNA_METABOLIC_PROCESS	GOBP_MIRNA_METABOLIC_PROCESS		85	0.0935234	1.00925	0.436559	0.567729	1	8548	tags=69%, list=60%, signal=173%
GOBP_POSITIVE_REGULATION_OF_REGULATED_SECRETORY_PATHWAY	GOBP_POSITIVE_REGULATION_OF_REGULATED_SECRETORY_PATHWAY		61	0.110379	1.0087	0.438525	0.568351	1	1933	tags=25%, list=14%, signal=28%
GOBP_MACROPHAGE_CYTOKINE_PRODUCTION	GOBP_MACROPHAGE_CYTOKINE_PRODUCTION		51	0.117595	1.00845	0.45	0.568464	1	11996	tags=96%, list=84%, signal=612%
GOBP_POSITIVE_REGULATION_OF_LIPID_TRANSPORT	GOBP_POSITIVE_REGULATION_OF_LIPID_TRANSPORT		93	0.0904944	1.00768	0.408998	0.569408	1	3155	tags=31%, list=22%, signal=40%
GOBP_CELLULAR_RESPONSE_TO_CAMP	GOBP_CELLULAR_RESPONSE_TO_CAMP		52	0.116286	1.00594	0.430303	0.571926	1	3274	tags=35%, list=23%, signal=45%
GOBP_SYNAPTIC_TRANSMISSION_GABAERGIC	GOBP_SYNAPTIC_TRANSMISSION_GABAERGIC		59	0.113017	1.00525	0.426615	0.572749	1	2255	tags=27%, list=16%, signal=32%
GOBP_POSITIVE_REGULATION_OF_PHAGOCYTOSIS	GOBP_POSITIVE_REGULATION_OF_PHAGOCYTOSIS		80	0.0940439	1.0051	0.426	0.572667	1	4002	tags=38%, list=28%, signal=52%
GOBP_REGULATION_OF_POSTSYNAPTIC_DENSITY_ASSEMBLY	GOBP_REGULATION_OF_POSTSYNAPTIC_DENSITY_ASSEMBLY		19	0.190173	1.00506	0.444672	0.572423	1	1789	tags=32%, list=13%, signal=36%
GOBP_RAB_PROTEIN_SIGNAL_TRANSDUCTION	GOBP_RAB_PROTEIN_SIGNAL_TRANSDUCTION		23	0.173677	1.00341	0.427368	0.574833	1	7426	tags=70%, list=52%, signal=145%
GOBP_CELLULAR_RESPONSE_TO_REACTIVE_NITROGEN_SPECIES	GOBP_CELLULAR_RESPONSE_TO_REACTIVE_NITROGEN_SPECIES		18	0.192064	1.00329	0.424686	0.574725	1	9912	tags=89%, list=70%, signal=293%
GOBP_POSITIVE_REGULATION_OF_NEURON_DIFFERENTIATION	GOBP_POSITIVE_REGULATION_OF_NEURON_DIFFERENTIATION		96	0.0882721	1.00325	0.427083	0.574481	1	1863	tags=22%, list=13%, signal=25%
GOBP_MEIOTIC_CELL_CYCLE_PROCESS	GOBP_MEIOTIC_CELL_CYCLE_PROCESS		176	0.0662275	1.00284	0.428	0.574859	1	10785	tags=82%, list=76%, signal=337%
GOBP_SMOOTH_MUSCLE_CONTRACTION	GOBP_SMOOTH_MUSCLE_CONTRACTION		102	0.0855224	1.00194	0.422349	0.576042	1	3253	tags=31%, list=23%, signal=40%
GOBP_REGULATION_OF_CARBOHYDRATE_BIOSYNTHETIC_PROCESS	GOBP_REGULATION_OF_CARBOHYDRATE_BIOSYNTHETIC_PROCESS		105	0.0834264	1.00139	0.44358	0.576633	1	3968	tags=36%, list=28%, signal=50%
GOBP_REGULATION_OF_PHAGOCYTOSIS	GOBP_REGULATION_OF_PHAGOCYTOSIS		109	0.0809838	1.00108	0.458078	0.57683	1	3553	tags=33%, list=25%, signal=44%
GOBP_SPHINGOMYELIN_METABOLIC_PROCESS	GOBP_SPHINGOMYELIN_METABOLIC_PROCESS		20	0.181656	1.00073	0.456212	0.577071	1	7374	tags=70%, list=52%, signal=145%
GOBP_FACULTATIVE_HETEROCHROMATIN_FORMATION	GOBP_FACULTATIVE_HETEROCHROMATIN_FORMATION		16	0.202279	0.999302	0.459082	0.579056	1	9569	tags=88%, list=67%, signal=267%
GOBP_VASCULAR_ASSOCIATED_SMOOTH_MUSCLE_CELL_PROLIFERATION	GOBP_VASCULAR_ASSOCIATED_SMOOTH_MUSCLE_CELL_PROLIFERATION		76	0.0987526	0.998286	0.453125	0.580402	1	6274	tags=54%, list=44%, signal=96%
GOBP_CELLULAR_RESPONSE_TO_OXYGEN_LEVELS	GOBP_CELLULAR_RESPONSE_TO_OXYGEN_LEVELS		165	0.066248	0.998276	0.455466	0.580106	1	11996	tags=91%, list=84%, signal=574%
GOBP_OVULATION_CYCLE	GOBP_OVULATION_CYCLE		73	0.0971501	0.998268	0.429644	0.579807	1	5248	tags=47%, list=37%, signal=73%
GOBP_EMBRYONIC_HEMOPOIESIS	GOBP_EMBRYONIC_HEMOPOIESIS		28	0.159427	0.998147	0.449905	0.579681	1	8402	tags=75%, list=59%, signal=183%
GOBP_NEGATIVE_REGULATION_OF_PROTEIN_CONTAINING_COMPLEX_ASSEMBLY	GOBP_NEGATIVE_REGULATION_OF_PROTEIN_CONTAINING_COMPLEX_ASSEMBLY		141	0.0736853	0.997359	0.440476	0.580665	1	5013	tags=43%, list=35%, signal=65%
GOBP_STEM_CELL_DEVELOPMENT	GOBP_STEM_CELL_DEVELOPMENT		87	0.0912888	0.997177	0.430528	0.580683	1	1651	tags=21%, list=12%, signal=23%
GOBP_DETECTION_OF_MECHANICAL_STIMULUS_INVOLVED_IN_SENSORY_PERCEPTION_OF_SOUND	GOBP_DETECTION_OF_MECHANICAL_STIMULUS_INVOLVED_IN_SENSORY_PERCEPTION_OF_SOUND		15	0.211056	0.997077	0.427992	0.580529	1	793	tags=27%, list=6%, signal=28%
GOBP_POSITIVE_REGULATION_OF_BINDING	GOBP_POSITIVE_REGULATION_OF_BINDING		127	0.0741272	0.997037	0.466403	0.58028	1	4889	tags=42%, list=34%, signal=63%
GOBP_LENS_MORPHOGENESIS_IN_CAMERA_TYPE_EYE	GOBP_LENS_MORPHOGENESIS_IN_CAMERA_TYPE_EYE		20	0.188261	0.99643	0.457661	0.580974	1	4436	tags=50%, list=31%, signal=73%
GOBP_MULTICELLULAR_ORGANISMAL_LEVEL_WATER_HOMEOSTASIS	GOBP_MULTICELLULAR_ORGANISMAL_LEVEL_WATER_HOMEOSTASIS		27	0.164777	0.995718	0.438272	0.581853	1	5034	tags=52%, list=35%, signal=80%
GOBP_REGULATION_OF_CELL_DIVISION	GOBP_REGULATION_OF_CELL_DIVISION		158	0.0683214	0.994391	0.444444	0.583702	1	10469	tags=80%, list=74%, signal=301%
GOBP_NEGATIVE_REGULATION_OF_OXIDOREDUCTASE_ACTIVITY	GOBP_NEGATIVE_REGULATION_OF_OXIDOREDUCTASE_ACTIVITY		17	0.200938	0.993536	0.443983	0.58479	1	491	tags=24%, list=3%, signal=24%
GOBP_NEGATIVE_REGULATION_OF_ERBB_SIGNALING_PATHWAY	GOBP_NEGATIVE_REGULATION_OF_ERBB_SIGNALING_PATHWAY		34	0.140947	0.993439	0.432122	0.584619	1	8456	tags=74%, list=59%, signal=181%
GOBP_RESPONSE_TO_EPIDERMAL_GROWTH_FACTOR	GOBP_RESPONSE_TO_EPIDERMAL_GROWTH_FACTOR		46	0.125305	0.992768	0.442688	0.585421	1	4715	tags=46%, list=33%, signal=68%
GOBP_GLYCEROPHOSPHOLIPID_METABOLIC_PROCESS	GOBP_GLYCEROPHOSPHOLIPID_METABOLIC_PROCESS		256	0.054374	0.992767	0.457854	0.585112	1	12183	tags=91%, list=86%, signal=624%
GOBP_CARDIAC_ATRIUM_DEVELOPMENT	GOBP_CARDIAC_ATRIUM_DEVELOPMENT		35	0.143032	0.992487	0.432712	0.585265	1	10972	tags=91%, list=77%, signal=399%
GOBP_REGULATION_OF_MUSCLE_ORGAN_DEVELOPMENT	GOBP_REGULATION_OF_MUSCLE_ORGAN_DEVELOPMENT		50	0.118822	0.991522	0.424419	0.586559	1	4288	tags=42%, list=30%, signal=60%
GOBP_RESPONSE_TO_ACETYLCHOLINE	GOBP_RESPONSE_TO_ACETYLCHOLINE		41	0.132497	0.99147	0.441909	0.586328	1	3323	tags=37%, list=23%, signal=48%
GOBP_POSITIVE_REGULATION_OF_MITOTIC_NUCLEAR_DIVISION	GOBP_POSITIVE_REGULATION_OF_MITOTIC_NUCLEAR_DIVISION		43	0.128865	0.991345	0.439175	0.586238	1	487	tags=16%, list=3%, signal=17%
GOBP_POSITIVE_REGULATION_OF_TUMOR_NECROSIS_FACTOR_SUPERFAMILY_CYTOKINE_PRODUCTION	GOBP_POSITIVE_REGULATION_OF_TUMOR_NECROSIS_FACTOR_SUPERFAMILY_CYTOKINE_PRODUCTION		115	0.0801207	0.990306	0.448485	0.587633	1	2084	tags=23%, list=15%, signal=26%
GOBP_MOTILE_CILIUM_ASSEMBLY	GOBP_MOTILE_CILIUM_ASSEMBLY		47	0.126373	0.989488	0.446602	0.588662	1	5167	tags=49%, list=36%, signal=77%
GOBP_REGULATION_OF_STEROID_BIOSYNTHETIC_PROCESS	GOBP_REGULATION_OF_STEROID_BIOSYNTHETIC_PROCESS		87	0.0914669	0.988575	0.451737	0.589866	1	3610	tags=34%, list=25%, signal=46%
GOBP_INTESTINAL_EPITHELIAL_CELL_DIFFERENTIATION	GOBP_INTESTINAL_EPITHELIAL_CELL_DIFFERENTIATION		26	0.166096	0.988082	0.440644	0.590345	1	1470	tags=27%, list=10%, signal=30%
GOBP_REGULATION_OF_NUCLEAR_DIVISION	GOBP_REGULATION_OF_NUCLEAR_DIVISION		134	0.0724951	0.988076	0.427992	0.590044	1	12562	tags=96%, list=88%, signal=811%
GOBP_POSITIVE_REGULATION_OF_STEM_CELL_DIFFERENTIATION	GOBP_POSITIVE_REGULATION_OF_STEM_CELL_DIFFERENTIATION		24	0.171324	0.987124	0.43787	0.591336	1	8825	tags=79%, list=62%, signal=208%
GOBP_REGULATION_OF_GLYCOLYTIC_PROCESS	GOBP_REGULATION_OF_GLYCOLYTIC_PROCESS		61	0.108864	0.986962	0.484791	0.591301	1	8249	tags=69%, list=58%, signal=163%
GOBP_PROTEIN_TRANSMEMBRANE_TRANSPORT	GOBP_PROTEIN_TRANSMEMBRANE_TRANSPORT		68	0.0993668	0.986362	0.452716	0.591976	1	11768	tags=93%, list=83%, signal=535%
GOBP_POSITIVE_REGULATION_OF_BROWN_FAT_CELL_DIFFERENTIATION	GOBP_POSITIVE_REGULATION_OF_BROWN_FAT_CELL_DIFFERENTIATION		16	0.204928	0.985366	0.440079	0.593299	1	11309	tags=100%, list=80%, signal=488%
GOBP_NEGATIVE_REGULATION_OF_MEMBRANE_PERMEABILITY	GOBP_NEGATIVE_REGULATION_OF_MEMBRANE_PERMEABILITY		21	0.184242	0.985303	0.460317	0.593091	1	8895	tags=81%, list=63%, signal=216%
GOBP_TRANSCYTOSIS	GOBP_TRANSCYTOSIS		22	0.176373	0.98425	0.478632	0.594541	1	5898	tags=59%, list=41%, signal=101%
GOBP_REGULATION_OF_FATTY_ACID_BIOSYNTHETIC_PROCESS	GOBP_REGULATION_OF_FATTY_ACID_BIOSYNTHETIC_PROCESS		50	0.119066	0.983704	0.475191	0.595111	1	7982	tags=68%, list=56%, signal=154%
GOBP_REGULATION_OF_EXTRACELLULAR_MATRIX_ASSEMBLY	GOBP_REGULATION_OF_EXTRACELLULAR_MATRIX_ASSEMBLY		19	0.19087	0.9837	0.452569	0.594809	1	4773	tags=53%, list=34%, signal=79%
GOBP_REGULATION_OF_ACTIN_NUCLEATION	GOBP_REGULATION_OF_ACTIN_NUCLEATION		25	0.166954	0.983696	0.462322	0.594499	1	4455	tags=48%, list=31%, signal=70%
GOBP_EMBRYONIC_CRANIAL_SKELETON_MORPHOGENESIS	GOBP_EMBRYONIC_CRANIAL_SKELETON_MORPHOGENESIS		49	0.119104	0.983463	0.454012	0.594562	1	4696	tags=45%, list=33%, signal=67%
GOBP_BROWN_FAT_CELL_DIFFERENTIATION	GOBP_BROWN_FAT_CELL_DIFFERENTIATION		60	0.10947	0.982958	0.480885	0.595112	1	1293	tags=20%, list=9%, signal=22%
GOBP_POSITIVE_REGULATION_OF_ORGANELLE_ORGANIZATION	GOBP_POSITIVE_REGULATION_OF_ORGANELLE_ORGANIZATION		485	0.040217	0.982904	0.473684	0.594887	1	12612	tags=93%, list=89%, signal=790%
GOBP_ENDODERMAL_CELL_DIFFERENTIATION	GOBP_ENDODERMAL_CELL_DIFFERENTIATION		40	0.129219	0.980897	0.457426	0.59791	1	4566	tags=45%, list=32%, signal=66%
GOBP_RNA_5_END_PROCESSING	GOBP_RNA_5_END_PROCESSING		20	0.182167	0.980723	0.47505	0.597919	1	10922	tags=95%, list=77%, signal=409%
GOBP_RESPONSE_TO_HYPEROXIA	GOBP_RESPONSE_TO_HYPEROXIA		15	0.209841	0.980589	0.454175	0.597827	1	11239	tags=100%, list=79%, signal=476%
GOBP_RESPONSE_TO_ISOQUINOLINE_ALKALOID	GOBP_RESPONSE_TO_ISOQUINOLINE_ALKALOID		15	0.207978	0.979518	0.45	0.599304	1	4629	tags=53%, list=33%, signal=79%
GOBP_GLYCOLIPID_CATABOLIC_PROCESS	GOBP_GLYCOLIPID_CATABOLIC_PROCESS		15	0.207837	0.979464	0.458733	0.599067	1	4631	tags=53%, list=33%, signal=79%
GOBP_MRNA_SPLICE_SITE_RECOGNITION	GOBP_MRNA_SPLICE_SITE_RECOGNITION		26	0.159374	0.979173	0.466395	0.599247	1	7582	tags=69%, list=53%, signal=148%
GOBP_RESPONSE_TO_PROTOZOAN	GOBP_RESPONSE_TO_PROTOZOAN		43	0.127528	0.979062	0.482688	0.599121	1	2821	tags=33%, list=20%, signal=40%
GOBP_CENTRAL_NERVOUS_SYSTEM_PROJECTION_NEURON_AXONOGENESIS	GOBP_CENTRAL_NERVOUS_SYSTEM_PROJECTION_NEURON_AXONOGENESIS		27	0.156592	0.978842	0.450902	0.599166	1	7257	tags=67%, list=51%, signal=136%
GOBP_MUSCLE_CELL_CELLULAR_HOMEOSTASIS	GOBP_MUSCLE_CELL_CELLULAR_HOMEOSTASIS		26	0.1624	0.977451	0.481855	0.60115	1	8086	tags=73%, list=57%, signal=169%
GOBP_HAIR_CYCLE_PHASE	GOBP_HAIR_CYCLE_PHASE		18	0.191564	0.977267	0.452675	0.601119	1	8339	tags=78%, list=59%, signal=188%
GOBP_REGULATION_OF_CELL_CYCLE_CHECKPOINT	GOBP_REGULATION_OF_CELL_CYCLE_CHECKPOINT		45	0.122296	0.976844	0.476096	0.60155	1	7746	tags=67%, list=54%, signal=146%
GOBP_AMINO_SUGAR_METABOLIC_PROCESS	GOBP_AMINO_SUGAR_METABOLIC_PROCESS		43	0.122688	0.976268	0.472689	0.602202	1	7189	tags=63%, list=51%, signal=127%
GOBP_SEX_DETERMINATION	GOBP_SEX_DETERMINATION		19	0.184033	0.976073	0.478261	0.602181	1	7864	tags=74%, list=55%, signal=165%
GOBP_RESPONSE_TO_ANTIBIOTIC	GOBP_RESPONSE_TO_ANTIBIOTIC		43	0.126137	0.975627	0.44227	0.602643	1	2510	tags=30%, list=18%, signal=37%
GOBP_NEGATIVE_REGULATION_OF_EXTRINSIC_APOPTOTIC_SIGNALING_PATHWAY_VIA_DEATH_DOMAIN_RECEPTORS	GOBP_NEGATIVE_REGULATION_OF_EXTRINSIC_APOPTOTIC_SIGNALING_PATHWAY_VIA_DEATH_DOMAIN_RECEPTORS		29	0.15406	0.975505	0.464286	0.602547	1	2226	tags=31%, list=16%, signal=37%
GOBP_REGULATION_OF_MITOTIC_NUCLEAR_DIVISION	GOBP_REGULATION_OF_MITOTIC_NUCLEAR_DIVISION		108	0.0801599	0.975213	0.461066	0.602721	1	12562	tags=96%, list=88%, signal=819%
GOBP_POSITIVE_REGULATION_OF_MACROPHAGE_ACTIVATION	GOBP_POSITIVE_REGULATION_OF_MACROPHAGE_ACTIVATION		28	0.154885	0.974864	0.490982	0.603009	1	5927	tags=57%, list=42%, signal=98%
GOBP_POSITIVE_REGULATION_OF_MITOTIC_CELL_CYCLE	GOBP_POSITIVE_REGULATION_OF_MITOTIC_CELL_CYCLE		123	0.0752831	0.9746	0.445585	0.603171	1	7609	tags=61%, list=54%, signal=130%
GOBP_MULTI_MULTICELLULAR_ORGANISM_PROCESS	GOBP_MULTI_MULTICELLULAR_ORGANISM_PROCESS		197	0.0603943	0.974587	0.492872	0.602881	1	6443	tags=51%, list=45%, signal=92%
GOBP_POSITIVE_REGULATION_OF_MEMBRANE_DEPOLARIZATION	GOBP_POSITIVE_REGULATION_OF_MEMBRANE_DEPOLARIZATION		15	0.206903	0.973553	0.485294	0.604287	1	852	tags=27%, list=6%, signal=28%
GOBP_POSITIVE_REGULATION_OF_AMINE_TRANSPORT	GOBP_POSITIVE_REGULATION_OF_AMINE_TRANSPORT		43	0.125537	0.973478	0.470019	0.604106	1	5495	tags=51%, list=39%, signal=83%
GOBP_TISSUE_MIGRATION	GOBP_TISSUE_MIGRATION		111	0.0791337	0.972149	0.476562	0.605976	1	1701	tags=20%, list=12%, signal=22%
GOBP_CELLULAR_RESPONSE_TO_ABIOTIC_STIMULUS	GOBP_CELLULAR_RESPONSE_TO_ABIOTIC_STIMULUS		297	0.0489088	0.97187	0.456693	0.60612	1	11911	tags=89%, list=84%, signal=534%
GOBP_RESPONSE_TO_ACID_CHEMICAL	GOBP_RESPONSE_TO_ACID_CHEMICAL		137	0.0711508	0.971464	0.478723	0.606523	1	2111	tags=22%, list=15%, signal=25%
GOBP_REGULATION_OF_FILOPODIUM_ASSEMBLY	GOBP_REGULATION_OF_FILOPODIUM_ASSEMBLY		47	0.11835	0.971272	0.483607	0.606539	1	4373	tags=43%, list=31%, signal=61%
GOBP_MYELOID_CELL_DIFFERENTIATION	GOBP_MYELOID_CELL_DIFFERENTIATION		435	0.0397768	0.971237	0.496855	0.606281	1	8539	tags=64%, list=60%, signal=155%
GOBP_REGULATION_OF_BROWN_FAT_CELL_DIFFERENTIATION	GOBP_REGULATION_OF_BROWN_FAT_CELL_DIFFERENTIATION		25	0.163297	0.970655	0.480962	0.606931	1	11333	tags=96%, list=80%, signal=472%
GOBP_POSITIVE_REGULATION_OF_COLLAGEN_METABOLIC_PROCESS	GOBP_POSITIVE_REGULATION_OF_COLLAGEN_METABOLIC_PROCESS		34	0.143686	0.970584	0.465164	0.606732	1	11345	tags=94%, list=80%, signal=464%
GOBP_CHROMOSOME_LOCALIZATION	GOBP_CHROMOSOME_LOCALIZATION		100	0.0833439	0.969123	0.482828	0.60882	1	11621	tags=90%, list=82%, signal=489%
GOBP_MEIOSIS_I_CELL_CYCLE_PROCESS	GOBP_MEIOSIS_I_CELL_CYCLE_PROCESS		95	0.0858834	0.968873	0.455769	0.608926	1	10462	tags=82%, list=74%, signal=309%
GOBP_REGULATION_OF_JNK_CASCADE	GOBP_REGULATION_OF_JNK_CASCADE		146	0.0690012	0.967518	0.485714	0.610876	1	13054	tags=99%, list=92%, signal=1190%
GOBP_TRIGLYCERIDE_STORAGE	GOBP_TRIGLYCERIDE_STORAGE		16	0.203498	0.966893	0.487619	0.61164	1	3330	tags=44%, list=23%, signal=57%
GOBP_REGULATION_OF_LAMELLIPODIUM_ORGANIZATION	GOBP_REGULATION_OF_LAMELLIPODIUM_ORGANIZATION		45	0.120791	0.965581	0.510557	0.613469	1	3027	tags=33%, list=21%, signal=42%
GOBP_SUBSTRATE_DEPENDENT_CELL_MIGRATION	GOBP_SUBSTRATE_DEPENDENT_CELL_MIGRATION		25	0.162209	0.964953	0.473684	0.614189	1	2247	tags=32%, list=16%, signal=38%
GOBP_REGULATION_OF_GRANULOCYTE_DIFFERENTIATION	GOBP_REGULATION_OF_GRANULOCYTE_DIFFERENTIATION		19	0.185282	0.964198	0.48503	0.615156	1	1110	tags=26%, list=8%, signal=29%
GOBP_VESICLE_MEDIATED_TRANSPORT_BETWEEN_ENDOSOMAL_COMPARTMENTS	GOBP_VESICLE_MEDIATED_TRANSPORT_BETWEEN_ENDOSOMAL_COMPARTMENTS		46	0.121273	0.964154	0.471042	0.614916	1	4463	tags=43%, list=31%, signal=63%
GOBP_POSITIVE_REGULATION_OF_CELLULAR_RESPONSE_TO_TRANSFORMING_GROWTH_FACTOR_BETA_STIMULUS	GOBP_POSITIVE_REGULATION_OF_CELLULAR_RESPONSE_TO_TRANSFORMING_GROWTH_FACTOR_BETA_STIMULUS		31	0.145755	0.964067	0.469008	0.614728	1	11693	tags=97%, list=82%, signal=543%
GOBP_PYRAMIDAL_NEURON_DIFFERENTIATION	GOBP_PYRAMIDAL_NEURON_DIFFERENTIATION		16	0.203243	0.963021	0.529981	0.616128	1	1556	tags=31%, list=11%, signal=35%
GOBP_POSITIVE_REGULATION_OF_PEPTIDYL_SERINE_PHOSPHORYLATION	GOBP_POSITIVE_REGULATION_OF_PEPTIDYL_SERINE_PHOSPHORYLATION		67	0.100473	0.962724	0.471513	0.616295	1	3671	tags=36%, list=26%, signal=48%
GOBP_EMBRYONIC_EYE_MORPHOGENESIS	GOBP_EMBRYONIC_EYE_MORPHOGENESIS		36	0.133903	0.962217	0.494908	0.616855	1	4025	tags=42%, list=28%, signal=58%
GOBP_NEGATIVE_REGULATION_OF_NUCLEAR_DIVISION	GOBP_NEGATIVE_REGULATION_OF_NUCLEAR_DIVISION		60	0.105853	0.962053	0.490272	0.616808	1	12484	tags=98%, list=88%, signal=802%
GOBP_POSITIVE_REGULATION_OF_PROTEIN_UBIQUITINATION	GOBP_POSITIVE_REGULATION_OF_PROTEIN_UBIQUITINATION		101	0.0836802	0.961901	0.465863	0.616751	1	10504	tags=82%, list=74%, signal=312%
GOBP_VESICLE_TARGETING_ROUGH_ER_TO_CIS_GOLGI	GOBP_VESICLE_TARGETING_ROUGH_ER_TO_CIS_GOLGI		16	0.195715	0.959574	0.483168	0.620293	1	6107	tags=63%, list=43%, signal=109%
GOBP_REGULATION_OF_CAMP_PKA_SIGNAL_TRANSDUCTION	GOBP_REGULATION_OF_CAMP_PKA_SIGNAL_TRANSDUCTION		19	0.183051	0.959445	0.466926	0.620174	1	6381	tags=63%, list=45%, signal=114%
GOBP_PHOSPHATIDYLCHOLINE_METABOLIC_PROCESS	GOBP_PHOSPHATIDYLCHOLINE_METABOLIC_PROCESS		61	0.104423	0.959383	0.493927	0.619952	1	3183	tags=33%, list=22%, signal=42%
GOBP_REGULATION_OF_ICOSANOID_SECRETION	GOBP_REGULATION_OF_ICOSANOID_SECRETION		23	0.162252	0.959378	0.493042	0.619644	1	5115	tags=52%, list=36%, signal=81%
GOBP_POSITIVE_REGULATION_OF_SYNCYTIUM_FORMATION_BY_PLASMA_MEMBRANE_FUSION	GOBP_POSITIVE_REGULATION_OF_SYNCYTIUM_FORMATION_BY_PLASMA_MEMBRANE_FUSION		24	0.163969	0.958766	0.516966	0.620358	1	3004	tags=38%, list=21%, signal=47%
GOBP_POSITIVE_REGULATION_OF_ACTIN_FILAMENT_BUNDLE_ASSEMBLY	GOBP_POSITIVE_REGULATION_OF_ACTIN_FILAMENT_BUNDLE_ASSEMBLY		63	0.102008	0.958602	0.482692	0.620318	1	1715	tags=22%, list=12%, signal=25%
GOBP_SYNAPTIC_TRANSMISSION_CHOLINERGIC	GOBP_SYNAPTIC_TRANSMISSION_CHOLINERGIC		24	0.160952	0.95811	0.5	0.620821	1	5417	tags=54%, list=38%, signal=87%
GOBP_REGULATION_OF_MITOCHONDRIAL_FISSION	GOBP_REGULATION_OF_MITOCHONDRIAL_FISSION		30	0.147267	0.957624	0.49503	0.621352	1	10234	tags=87%, list=72%, signal=308%
GOBP_ESTABLISHMENT_OF_SKIN_BARRIER	GOBP_ESTABLISHMENT_OF_SKIN_BARRIER		40	0.128503	0.957591	0.477842	0.621095	1	2443	tags=30%, list=17%, signal=36%
GOBP_DETECTION_OF_EXTERNAL_STIMULUS	GOBP_DETECTION_OF_EXTERNAL_STIMULUS		99	0.0822358	0.95713	0.488372	0.621511	1	3578	tags=33%, list=25%, signal=44%
GOBP_TRACHEA_DEVELOPMENT	GOBP_TRACHEA_DEVELOPMENT		20	0.179607	0.956878	0.494094	0.621613	1	5981	tags=60%, list=42%, signal=103%
GOBP_REGULATION_OF_TRANSCRIPTION_BY_RNA_POLYMERASE_I	GOBP_REGULATION_OF_TRANSCRIPTION_BY_RNA_POLYMERASE_I		41	0.125742	0.955442	0.484849	0.623682	1	10009	tags=83%, list=70%, signal=279%
GOBP_POSITIVE_REGULATION_OF_PROTEIN_LOCALIZATION_TO_NUCLEUS	GOBP_POSITIVE_REGULATION_OF_PROTEIN_LOCALIZATION_TO_NUCLEUS		95	0.0852523	0.953639	0.485169	0.626467	1	10920	tags=85%, list=77%, signal=365%
GOBP_REGULATION_OF_CARTILAGE_DEVELOPMENT	GOBP_REGULATION_OF_CARTILAGE_DEVELOPMENT		66	0.100947	0.953599	0.487713	0.626215	1	6327	tags=55%, list=44%, signal=98%
GOBP_REGULATION_OF_PROTEIN_EXIT_FROM_ENDOPLASMIC_RETICULUM	GOBP_REGULATION_OF_PROTEIN_EXIT_FROM_ENDOPLASMIC_RETICULUM		21	0.171945	0.953242	0.508982	0.626464	1	10424	tags=90%, list=73%, signal=338%
GOBP_KETONE_BIOSYNTHETIC_PROCESS	GOBP_KETONE_BIOSYNTHETIC_PROCESS		44	0.117598	0.953109	0.487379	0.626361	1	11260	tags=91%, list=79%, signal=435%
GOBP_POSITIVE_REGULATION_OF_CYTOSKELETON_ORGANIZATION	GOBP_POSITIVE_REGULATION_OF_CYTOSKELETON_ORGANIZATION		176	0.0619887	0.951549	0.503876	0.62868	1	1310	tags=15%, list=9%, signal=17%
GOBP_PLATELET_AGGREGATION	GOBP_PLATELET_AGGREGATION		59	0.106744	0.951165	0.489496	0.629027	1	3549	tags=36%, list=25%, signal=47%
GOBP_POSITIVE_REGULATION_OF_INTERLEUKIN_8_PRODUCTION	GOBP_POSITIVE_REGULATION_OF_INTERLEUKIN_8_PRODUCTION		55	0.108361	0.949263	0.511628	0.631928	1	6738	tags=58%, list=47%, signal=110%
GOBP_PROSTATE_GLAND_DEVELOPMENT	GOBP_PROSTATE_GLAND_DEVELOPMENT		56	0.107089	0.948461	0.522088	0.632964	1	8386	tags=70%, list=59%, signal=169%
GOBP_FEEDING_BEHAVIOR	GOBP_FEEDING_BEHAVIOR		99	0.0827143	0.948088	0.498054	0.633274	1	5295	tags=45%, list=37%, signal=72%
GOBP_POSITIVE_REGULATION_OF_CELL_SUBSTRATE_JUNCTION_ORGANIZATION	GOBP_POSITIVE_REGULATION_OF_CELL_SUBSTRATE_JUNCTION_ORGANIZATION		34	0.135337	0.947822	0.506276	0.6334	1	6026	tags=56%, list=42%, signal=97%
GOBP_REGULATION_OF_COMPLEMENT_ACTIVATION	GOBP_REGULATION_OF_COMPLEMENT_ACTIVATION		17	0.191972	0.947673	0.497006	0.633335	1	4801	tags=53%, list=34%, signal=80%
GOBP_POSITIVE_REGULATION_OF_GTPASE_ACTIVITY	GOBP_POSITIVE_REGULATION_OF_GTPASE_ACTIVITY		132	0.0734745	0.946289	0.540041	0.635379	1	11892	tags=91%, list=84%, signal=550%
GOBP_ODONTOGENESIS_OF_DENTIN_CONTAINING_TOOTH	GOBP_ODONTOGENESIS_OF_DENTIN_CONTAINING_TOOTH		84	0.0845973	0.944887	0.52008	0.6374	1	2189	tags=24%, list=15%, signal=28%
GOBP_OVULATION_CYCLE_PROCESS	GOBP_OVULATION_CYCLE_PROCESS		51	0.109614	0.944855	0.504799	0.637126	1	5138	tags=47%, list=36%, signal=73%
GOBP_NEGATIVE_REGULATION_OF_CILIUM_ASSEMBLY	GOBP_NEGATIVE_REGULATION_OF_CILIUM_ASSEMBLY		21	0.17057	0.944673	0.507782	0.637114	1	5026	tags=52%, list=35%, signal=81%
GOBP_ECTODERMAL_PLACODE_DEVELOPMENT	GOBP_ECTODERMAL_PLACODE_DEVELOPMENT		15	0.201342	0.944663	0.527163	0.636803	1	931	tags=27%, list=7%, signal=29%
GOBP_POSTSYNAPTIC_SIGNAL_TRANSDUCTION	GOBP_POSTSYNAPTIC_SIGNAL_TRANSDUCTION		54	0.108689	0.943933	0.523422	0.637669	1	5043	tags=46%, list=35%, signal=71%
GOBP_EATING_BEHAVIOR	GOBP_EATING_BEHAVIOR		38	0.127935	0.942889	0.507042	0.639102	1	5295	tags=50%, list=37%, signal=79%
GOBP_OVARIAN_FOLLICLE_DEVELOPMENT	GOBP_OVARIAN_FOLLICLE_DEVELOPMENT		66	0.0998138	0.942544	0.522772	0.639354	1	3111	tags=32%, list=22%, signal=41%
GOBP_NEGATIVE_REGULATION_OF_MYELOID_CELL_DIFFERENTIATION	GOBP_NEGATIVE_REGULATION_OF_MYELOID_CELL_DIFFERENTIATION		86	0.0876696	0.942151	0.505285	0.63967	1	2067	tags=23%, list=15%, signal=27%
GOBP_PIGMENTATION	GOBP_PIGMENTATION		99	0.0805985	0.941936	0.519427	0.639702	1	4463	tags=39%, list=31%, signal=57%
GOBP_TYPE_B_PANCREATIC_CELL_APOPTOTIC_PROCESS	GOBP_TYPE_B_PANCREATIC_CELL_APOPTOTIC_PROCESS		17	0.190381	0.941689	0.525896	0.639816	1	2314	tags=35%, list=16%, signal=42%
GOBP_NEGATIVE_REGULATION_OF_LIPID_METABOLIC_PROCESS	GOBP_NEGATIVE_REGULATION_OF_LIPID_METABOLIC_PROCESS		103	0.0794902	0.941367	0.513216	0.640038	1	3433	tags=32%, list=24%, signal=42%
GOBP_CHONDROITIN_SULFATE_PROTEOGLYCAN_METABOLIC_PROCESS	GOBP_CHONDROITIN_SULFATE_PROTEOGLYCAN_METABOLIC_PROCESS		33	0.137222	0.940805	0.522727	0.640651	1	5809	tags=55%, list=41%, signal=92%
GOBP_LENS_FIBER_CELL_DIFFERENTIATION	GOBP_LENS_FIBER_CELL_DIFFERENTIATION		33	0.137143	0.939835	0.522917	0.641957	1	6672	tags=61%, list=47%, signal=114%
GOBP_POSITIVE_REGULATION_OF_NUCLEOTIDE_METABOLIC_PROCESS	GOBP_POSITIVE_REGULATION_OF_NUCLEOTIDE_METABOLIC_PROCESS		48	0.116837	0.938809	0.481113	0.64337	1	8120	tags=69%, list=57%, signal=160%
GOBP_PORE_COMPLEX_ASSEMBLY	GOBP_PORE_COMPLEX_ASSEMBLY		19	0.176917	0.938662	0.506148	0.643304	1	9462	tags=84%, list=67%, signal=251%
GOBP_POSITIVE_REGULATION_OF_CELLULAR_EXTRAVASATION	GOBP_POSITIVE_REGULATION_OF_CELLULAR_EXTRAVASATION		21	0.169728	0.938208	0.516878	0.643755	1	1652	tags=29%, list=12%, signal=32%
GOBP_REGULATION_OF_GLIAL_CELL_MIGRATION	GOBP_REGULATION_OF_GLIAL_CELL_MIGRATION		24	0.160894	0.937597	0.500994	0.644465	1	7788	tags=71%, list=55%, signal=156%
GOBP_CELLULAR_RESPONSE_TO_DSRNA	GOBP_CELLULAR_RESPONSE_TO_DSRNA		19	0.177992	0.937201	0.516068	0.644818	1	1962	tags=32%, list=14%, signal=37%
GOBP_REGULATION_OF_SMOOTH_MUSCLE_CONTRACTION	GOBP_REGULATION_OF_SMOOTH_MUSCLE_CONTRACTION		62	0.101994	0.935771	0.519115	0.646883	1	5436	tags=48%, list=38%, signal=78%
GOBP_CHAPERONE_COFACTOR_DEPENDENT_PROTEIN_REFOLDING	GOBP_CHAPERONE_COFACTOR_DEPENDENT_PROTEIN_REFOLDING		31	0.141165	0.935467	0.493697	0.6471	1	4877	tags=48%, list=34%, signal=73%
GOBP_TROPHECTODERMAL_CELL_DIFFERENTIATION	GOBP_TROPHECTODERMAL_CELL_DIFFERENTIATION		23	0.161064	0.935368	0.527607	0.646934	1	9460	tags=83%, list=67%, signal=246%
GOBP_NEGATIVE_REGULATION_OF_CELLULAR_RESPONSE_TO_HYPOXIA	GOBP_NEGATIVE_REGULATION_OF_CELLULAR_RESPONSE_TO_HYPOXIA		15	0.19877	0.934174	0.536688	0.648588	1	7604	tags=73%, list=53%, signal=157%
GOBP_LONG_TERM_SYNAPTIC_DEPRESSION	GOBP_LONG_TERM_SYNAPTIC_DEPRESSION		33	0.140507	0.934079	0.512605	0.648442	1	1453	tags=24%, list=10%, signal=27%
GOBP_POSITIVE_REGULATION_OF_MESENCHYMAL_CELL_PROLIFERATION	GOBP_POSITIVE_REGULATION_OF_MESENCHYMAL_CELL_PROLIFERATION		34	0.132254	0.932981	0.524809	0.649967	1	6488	tags=59%, list=46%, signal=108%
GOBP_NEGATIVE_REGULATION_OF_SIGNALING_RECEPTOR_ACTIVITY	GOBP_NEGATIVE_REGULATION_OF_SIGNALING_RECEPTOR_ACTIVITY		23	0.163703	0.932708	0.51417	0.650081	1	6331	tags=61%, list=45%, signal=110%
GOBP_ATRIOVENTRICULAR_VALVE_DEVELOPMENT	GOBP_ATRIOVENTRICULAR_VALVE_DEVELOPMENT		32	0.138822	0.930596	0.518447	0.6533	1	8695	tags=75%, list=61%, signal=193%
GOBP_REGULATION_OF_MACROPHAGE_DIFFERENTIATION	GOBP_REGULATION_OF_MACROPHAGE_DIFFERENTIATION		21	0.168763	0.930507	0.538	0.653117	1	9792	tags=86%, list=69%, signal=275%
GOBP_CARDIAC_NEURAL_CREST_CELL_DIFFERENTIATION_INVOLVED_IN_HEART_DEVELOPMENT	GOBP_CARDIAC_NEURAL_CREST_CELL_DIFFERENTIATION_INVOLVED_IN_HEART_DEVELOPMENT		20	0.174942	0.930078	0.539683	0.653479	1	2492	tags=35%, list=18%, signal=42%
GOBP_NEGATIVE_REGULATION_OF_VASOCONSTRICTION	GOBP_NEGATIVE_REGULATION_OF_VASOCONSTRICTION		16	0.190558	0.928999	0.503018	0.655008	1	2625	tags=38%, list=18%, signal=46%
GOBP_CIRCADIAN_RHYTHM	GOBP_CIRCADIAN_RHYTHM		206	0.0565247	0.928153	0.529175	0.656124	1	5696	tags=46%, list=40%, signal=75%
GOBP_NEGATIVE_REGULATION_OF_DNA_BINDING_TRANSCRIPTION_FACTOR_ACTIVITY	GOBP_NEGATIVE_REGULATION_OF_DNA_BINDING_TRANSCRIPTION_FACTOR_ACTIVITY		127	0.0706695	0.927488	0.524085	0.656883	1	8409	tags=66%, list=59%, signal=160%
GOBP_CELLULAR_RESPONSE_TO_LEPTIN_STIMULUS	GOBP_CELLULAR_RESPONSE_TO_LEPTIN_STIMULUS		18	0.181546	0.927226	0.523365	0.656991	1	4531	tags=50%, list=32%, signal=73%
GOBP_POSITIVE_REGULATION_OF_GLYCOGEN_METABOLIC_PROCESS	GOBP_POSITIVE_REGULATION_OF_GLYCOGEN_METABOLIC_PROCESS		26	0.149953	0.926908	0.506958	0.6572	1	3887	tags=42%, list=27%, signal=58%
GOBP_LEUKOCYTE_ACTIVATION_INVOLVED_IN_INFLAMMATORY_RESPONSE	GOBP_LEUKOCYTE_ACTIVATION_INVOLVED_IN_INFLAMMATORY_RESPONSE		52	0.112334	0.926902	0.516966	0.656885	1	3330	tags=35%, list=23%, signal=45%
[truncated: 460 more rows]

## Sheet: table S4
NAME	GS<br> follow link to MSigDB	GS DETAILS	SIZE	ES	NES	NOM p-val	FDR q-val	FWER p-val	RANK AT MAX	LEADING EDGE
GOBP_TRANSLATION_AT_SYNAPSE	GOBP_TRANSLATION_AT_SYNAPSE	Details ...	48	-0.77504	-6.35636	0	0	0	1756	tags=90%, list=12%, signal=102%
GOBP_CYTOPLASMIC_TRANSLATION	GOBP_CYTOPLASMIC_TRANSLATION	Details ...	157	-0.409886	-5.9611	0	0	0	1211	tags=49%, list=9%, signal=53%
GOBP_AEROBIC_RESPIRATION	GOBP_AEROBIC_RESPIRATION	Details ...	149	-0.321224	-4.48603	0	0	0	6743	tags=79%, list=47%, signal=149%
GOBP_OXIDATIVE_PHOSPHORYLATION	GOBP_OXIDATIVE_PHOSPHORYLATION	Details ...	108	-0.355995	-4.39229	0	0	0	6696	tags=82%, list=47%, signal=155%
GOBP_CELLULAR_RESPIRATION	GOBP_CELLULAR_RESPIRATION	Details ...	196	-0.269422	-4.35847	0	0	0	6743	tags=74%, list=47%, signal=139%
GOBP_ENERGY_DERIVATION_BY_OXIDATION_OF_ORGANIC_COMPOUNDS	GOBP_ENERGY_DERIVATION_BY_OXIDATION_OF_ORGANIC_COMPOUNDS	Details ...	291	-0.215919	-4.30101	0	0	0	6816	tags=69%, list=48%, signal=130%
GOBP_GENERATION_OF_PRECURSOR_METABOLITES_AND_ENERGY	GOBP_GENERATION_OF_PRECURSOR_METABOLITES_AND_ENERGY	Details ...	402	-0.174979	-4.0954	0	0	0	6816	tags=65%, list=48%, signal=121%
GOBP_SMALL_MOLECULE_CATABOLIC_PROCESS	GOBP_SMALL_MOLECULE_CATABOLIC_PROCESS	Details ...	339	-0.183138	-3.971	0	0	0	6394	tags=63%, list=45%, signal=111%
GOBP_MITOCHONDRIAL_TRANSLATION	GOBP_MITOCHONDRIAL_TRANSLATION	Details ...	118	-0.304252	-3.90555	0	0	0	8967	tags=93%, list=63%, signal=250%
GOBP_ELECTRON_TRANSPORT_CHAIN	GOBP_ELECTRON_TRANSPORT_CHAIN	Details ...	85	-0.351189	-3.8023	0	0	0	6748	tags=82%, list=47%, signal=156%
GOBP_ORGANIC_ACID_CATABOLIC_PROCESS	GOBP_ORGANIC_ACID_CATABOLIC_PROCESS	Details ...	229	-0.217715	-3.79464	0	0	0	6394	tags=66%, list=45%, signal=119%
GOBP_MITOCHONDRIAL_GENE_EXPRESSION	GOBP_MITOCHONDRIAL_GENE_EXPRESSION	Details ...	150	-0.252184	-3.64799	0	0	0	8967	tags=88%, list=63%, signal=236%
GOBP_AEROBIC_ELECTRON_TRANSPORT_CHAIN	GOBP_AEROBIC_ELECTRON_TRANSPORT_CHAIN	Details ...	52	-0.427386	-3.64239	0	0	0	6252	tags=87%, list=44%, signal=154%
GOBP_ATP_SYNTHESIS_COUPLED_ELECTRON_TRANSPORT	GOBP_ATP_SYNTHESIS_COUPLED_ELECTRON_TRANSPORT	Details ...	62	-0.401937	-3.61928	0	0	0	6696	tags=87%, list=47%, signal=164%
GOBP_NUCLEOTIDE_METABOLIC_PROCESS	GOBP_NUCLEOTIDE_METABOLIC_PROCESS	Details ...	421	-0.151523	-3.5698	0	0	0	6929	tags=63%, list=49%, signal=120%
GOBP_AMINO_ACID_CATABOLIC_PROCESS	GOBP_AMINO_ACID_CATABOLIC_PROCESS	Details ...	99	-0.302141	-3.54283	0	0	0	6364	tags=75%, list=45%, signal=134%
GOBP_HUMORAL_IMMUNE_RESPONSE	GOBP_HUMORAL_IMMUNE_RESPONSE	Details ...	185	-0.221394	-3.49226	0	0	0	3120	tags=44%, list=22%, signal=55%
GOBP_PROTON_MOTIVE_FORCE_DRIVEN_ATP_SYNTHESIS	GOBP_PROTON_MOTIVE_FORCE_DRIVEN_ATP_SYNTHESIS	Details ...	43	-0.441306	-3.47762	0	0	0	6973	tags=93%, list=49%, signal=182%
GOBP_RIBONUCLEOPROTEIN_COMPLEX_BIOGENESIS	GOBP_RIBONUCLEOPROTEIN_COMPLEX_BIOGENESIS	Details ...	395	-0.149782	-3.4548	0	0	0	10603	tags=89%, list=75%, signal=341%
GOBP_FATTY_ACID_METABOLIC_PROCESS	GOBP_FATTY_ACID_METABOLIC_PROCESS	Details ...	428	-0.144905	-3.41175	0	0	0	5578	tags=53%, list=39%, signal=85%
GOBP_ALPHA_AMINO_ACID_METABOLIC_PROCESS	GOBP_ALPHA_AMINO_ACID_METABOLIC_PROCESS		190	-0.209791	-3.37916	0	0	0	4617	tags=53%, list=32%, signal=78%
GOBP_GLYCERALDEHYDE_3_PHOSPHATE_METABOLIC_PROCESS	GOBP_GLYCERALDEHYDE_3_PHOSPHATE_METABOLIC_PROCESS		18	-0.639286	-3.26722	0	0	0	1982	tags=78%, list=14%, signal=90%
GOBP_MITOCHONDRIAL_RESPIRATORY_CHAIN_COMPLEX_ASSEMBLY	GOBP_MITOCHONDRIAL_RESPIRATORY_CHAIN_COMPLEX_ASSEMBLY		76	-0.312352	-3.22411	0	0	0	6997	tags=80%, list=49%, signal=157%
GOBP_DICARBOXYLIC_ACID_METABOLIC_PROCESS	GOBP_DICARBOXYLIC_ACID_METABOLIC_PROCESS		97	-0.279845	-3.22382	0	0	0	5578	tags=67%, list=39%, signal=110%
GOBP_AROMATIC_AMINO_ACID_FAMILY_CATABOLIC_PROCESS	GOBP_AROMATIC_AMINO_ACID_FAMILY_CATABOLIC_PROCESS		21	-0.582622	-3.21798	0	0	0	3240	tags=81%, list=23%, signal=105%
GOBP_ANTIMICROBIAL_HUMORAL_RESPONSE	GOBP_ANTIMICROBIAL_HUMORAL_RESPONSE		108	-0.264164	-3.21657	0	0	0	3120	tags=48%, list=22%, signal=61%
GOBP_ORGANOPHOSPHATE_BIOSYNTHETIC_PROCESS	GOBP_ORGANOPHOSPHATE_BIOSYNTHETIC_PROCESS		499	-0.128239	-3.20581	0	3.00822e-05	0.001	6848	tags=61%, list=48%, signal=113%
GOBP_AROMATIC_AMINO_ACID_METABOLIC_PROCESS	GOBP_AROMATIC_AMINO_ACID_METABOLIC_PROCESS		40	-0.423429	-3.18944	0	2.90078e-05	0.001	3240	tags=65%, list=23%, signal=84%
GOBP_ERYTHROSE_4_PHOSPHATE_PHOSPHOENOLPYRUVATE_FAMILY_AMINO_ACID_METABOLIC_PROCESS	GOBP_ERYTHROSE_4_PHOSPHATE_PHOSPHOENOLPYRUVATE_FAMILY_AMINO_ACID_METABOLIC_PROCESS		29	-0.49739	-3.18572	0	2.80075e-05	0.001	3240	tags=72%, list=23%, signal=94%
GOBP_ERYTHROSE_4_PHOSPHATE_PHOSPHOENOLPYRUVATE_FAMILY_AMINO_ACID_CATABOLIC_PROCESS	GOBP_ERYTHROSE_4_PHOSPHATE_PHOSPHOENOLPYRUVATE_FAMILY_AMINO_ACID_CATABOLIC_PROCESS		16	-0.647967	-3.17221	0	2.70739e-05	0.001	3240	tags=88%, list=23%, signal=113%
GOBP_PURINE_CONTAINING_COMPOUND_BIOSYNTHETIC_PROCESS	GOBP_PURINE_CONTAINING_COMPOUND_BIOSYNTHETIC_PROCESS		203	-0.190008	-3.15185	0	2.62006e-05	0.001	7075	tags=68%, list=50%, signal=134%
GOBP_NUCLEOTIDE_BIOSYNTHETIC_PROCESS	GOBP_NUCLEOTIDE_BIOSYNTHETIC_PROCESS		184	-0.191566	-3.12128	0	2.53818e-05	0.001	6973	tags=68%, list=49%, signal=132%
GOBP_ATP_BIOSYNTHETIC_PROCESS	GOBP_ATP_BIOSYNTHETIC_PROCESS		71	-0.314124	-3.12111	0	2.46127e-05	0.001	6973	tags=80%, list=49%, signal=157%
GOBP_MRNA_PROCESSING	GOBP_MRNA_PROCESSING		433	-0.130025	-3.1008	0	2.38888e-05	0.001	9966	tags=83%, list=70%, signal=268%
GOBP_ALDEHYDE_METABOLIC_PROCESS	GOBP_ALDEHYDE_METABOLIC_PROCESS		72	-0.309671	-3.09995	0	2.32062e-05	0.001	3125	tags=53%, list=22%, signal=67%
GOBP_ANTIMICROBIAL_HUMORAL_IMMUNE_RESPONSE_MEDIATED_BY_ANTIMICROBIAL_PEPTIDE	GOBP_ANTIMICROBIAL_HUMORAL_IMMUNE_RESPONSE_MEDIATED_BY_ANTIMICROBIAL_PEPTIDE		86	-0.279566	-3.08062	0	4.41503e-05	0.002	4152	tags=57%, list=29%, signal=80%
GOBP_ACYL_COA_METABOLIC_PROCESS	GOBP_ACYL_COA_METABOLIC_PROCESS		95	-0.266372	-3.06327	0	4.2957e-05	0.002	5669	tags=66%, list=40%, signal=110%
GOBP_AMINO_ACID_METABOLIC_PROCESS	GOBP_AMINO_ACID_METABOLIC_PROCESS		242	-0.16732	-2.97477	0	0.000125422	0.006	4655	tags=49%, list=33%, signal=72%
GOBP_NUCLEOSIDE_TRIPHOSPHATE_BIOSYNTHETIC_PROCESS	GOBP_NUCLEOSIDE_TRIPHOSPHATE_BIOSYNTHETIC_PROCESS		92	-0.26163	-2.96717	0	0.000122206	0.006	5579	tags=65%, list=39%, signal=107%
GOBP_KILLING_OF_CELLS_OF_ANOTHER_ORGANISM	GOBP_KILLING_OF_CELLS_OF_ANOTHER_ORGANISM		84	-0.275326	-2.92706	0	0.000199639	0.01	4235	tags=57%, list=30%, signal=81%
GOBP_TRICARBOXYLIC_ACID_CYCLE	GOBP_TRICARBOXYLIC_ACID_CYCLE		30	-0.446046	-2.92098	0	0.00019477	0.01	5522	tags=83%, list=39%, signal=136%
GOBP_L_AMINO_ACID_METABOLIC_PROCESS	GOBP_L_AMINO_ACID_METABOLIC_PROCESS		157	-0.203095	-2.89657	0	0.000209327	0.011	5478	tags=59%, list=39%, signal=94%
GOBP_REGULATION_OF_MONOATOMIC_ION_TRANSMEMBRANE_TRANSPORT	GOBP_REGULATION_OF_MONOATOMIC_ION_TRANSMEMBRANE_TRANSPORT		303	-0.14543	-2.89471	0	0.000204459	0.011	4313	tags=45%, list=30%, signal=63%
GOBP_DISRUPTION_OF_ANATOMICAL_STRUCTURE_IN_ANOTHER_ORGANISM	GOBP_DISRUPTION_OF_ANATOMICAL_STRUCTURE_IN_ANOTHER_ORGANISM		87	-0.267124	-2.89214	0	0.000199812	0.011	4235	tags=56%, list=30%, signal=80%
GOBP_ADAPTIVE_IMMUNE_RESPONSE	GOBP_ADAPTIVE_IMMUNE_RESPONSE		415	-0.123559	-2.88956	0	0.000212734	0.012	3401	tags=36%, list=24%, signal=46%
GOBP_RNA_SPLICING	GOBP_RNA_SPLICING		389	-0.126128	-2.86406	0	0.000242645	0.014	9699	tags=80%, list=68%, signal=246%
GOBP_NADP_METABOLIC_PROCESS	GOBP_NADP_METABOLIC_PROCESS		41	-0.3711	-2.85777	0	0.000254449	0.015	3757	tags=63%, list=26%, signal=86%
GOBP_ORGANIC_ANION_TRANSPORT	GOBP_ORGANIC_ANION_TRANSPORT		406	-0.124728	-2.85611	0	0.000265697	0.016	3602	tags=37%, list=25%, signal=49%
GOBP_RNA_SPLICING_VIA_TRANSESTERIFICATION_REACTIONS	GOBP_RNA_SPLICING_VIA_TRANSESTERIFICATION_REACTIONS		258	-0.155032	-2.85601	0	0.000260274	0.016	9632	tags=83%, list=68%, signal=252%
GOBP_RIBOSOME_BIOGENESIS	GOBP_RIBOSOME_BIOGENESIS		279	-0.149897	-2.84757	0	0.000255069	0.016	10603	tags=89%, list=75%, signal=344%
GOBP_NUCLEOSIDE_PHOSPHATE_BIOSYNTHETIC_PROCESS	GOBP_NUCLEOSIDE_PHOSPHATE_BIOSYNTHETIC_PROCESS		259	-0.15393	-2.84484	0	0.000250067	0.016	6637	tags=62%, list=47%, signal=114%
GOBP_DEFENSE_RESPONSE_TO_BACTERIUM	GOBP_DEFENSE_RESPONSE_TO_BACTERIUM		274	-0.152131	-2.82783	0	0.000306252	0.02	3796	tags=42%, list=27%, signal=56%
GOBP_PRIMARY_ALCOHOL_METABOLIC_PROCESS	GOBP_PRIMARY_ALCOHOL_METABOLIC_PROCESS		97	-0.24194	-2.81067	0	0.000345051	0.023	2888	tags=44%, list=20%, signal=55%
GOBP_MEDIUM_CHAIN_FATTY_ACID_METABOLIC_PROCESS	GOBP_MEDIUM_CHAIN_FATTY_ACID_METABOLIC_PROCESS		21	-0.510778	-2.80255	0	0.000383185	0.026	3583	tags=76%, list=25%, signal=102%
GOBP_SODIUM_ION_TRANSPORT	GOBP_SODIUM_ION_TRANSPORT		211	-0.16557	-2.79757	0	0.000404955	0.028	3545	tags=41%, list=25%, signal=54%
GOBP_OLEFINIC_COMPOUND_METABOLIC_PROCESS	GOBP_OLEFINIC_COMPOUND_METABOLIC_PROCESS		181	-0.174815	-2.79096	0	0.000411894	0.029	3125	tags=39%, list=22%, signal=50%
GOBP_L_AMINO_ACID_CATABOLIC_PROCESS	GOBP_L_AMINO_ACID_CATABOLIC_PROCESS		70	-0.282779	-2.78857	0	0.000404668	0.029	4532	tags=60%, list=32%, signal=88%
GOBP_NADH_DEHYDROGENASE_COMPLEX_ASSEMBLY	GOBP_NADH_DEHYDROGENASE_COMPLEX_ASSEMBLY		45	-0.349669	-2.77471	0	0.000492963	0.036	8001	tags=91%, list=56%, signal=208%
GOBP_MITOCHONDRION_ORGANIZATION	GOBP_MITOCHONDRION_ORGANIZATION		384	-0.11964	-2.75351	0	0.000591547	0.043	7604	tags=65%, list=53%, signal=136%
GOBP_MYOFIBRIL_ASSEMBLY	GOBP_MYOFIBRIL_ASSEMBLY		75	-0.266886	-2.7529	0	0.000581688	0.043	4379	tags=57%, list=31%, signal=82%
GOBP_PURINE_NUCLEOTIDE_BIOSYNTHETIC_PROCESS	GOBP_PURINE_NUCLEOTIDE_BIOSYNTHETIC_PROCESS		151	-0.193524	-2.72781	0	0.000664076	0.049	6696	tags=66%, list=47%, signal=124%
GOBP_NUCLEOSIDE_TRIPHOSPHATE_METABOLIC_PROCESS	GOBP_NUCLEOSIDE_TRIPHOSPHATE_METABOLIC_PROCESS		244	-0.151462	-2.71671	0	0.000692169	0.051	6743	tags=62%, list=47%, signal=116%
GOBP_ORGANIC_ACID_BIOSYNTHETIC_PROCESS	GOBP_ORGANIC_ACID_BIOSYNTHETIC_PROCESS		314	-0.133496	-2.71472	0	0.000681182	0.051	5572	tags=52%, list=39%, signal=84%
GOBP_REGULATION_OF_MONOATOMIC_ION_TRANSPORT	GOBP_REGULATION_OF_MONOATOMIC_ION_TRANSPORT		426	-0.117648	-2.69844	0	0.000782785	0.06	4220	tags=41%, list=30%, signal=57%
GOBP_RENAL_ABSORPTION	GOBP_RENAL_ABSORPTION		39	-0.366624	-2.69457	0	0.000795237	0.062	2459	tags=54%, list=17%, signal=65%
GOBP_SODIUM_ION_TRANSMEMBRANE_TRANSPORT	GOBP_SODIUM_ION_TRANSMEMBRANE_TRANSPORT		143	-0.193294	-2.67999	0	0.000903837	0.072	3545	tags=44%, list=25%, signal=58%
GOBP_ACETYL_COA_METABOLIC_PROCESS	GOBP_ACETYL_COA_METABOLIC_PROCESS		40	-0.349557	-2.6576	0	0.00106851	0.086	3221	tags=58%, list=23%, signal=74%
GOBP_PORPHYRIN_CONTAINING_COMPOUND_METABOLIC_PROCESS	GOBP_PORPHYRIN_CONTAINING_COMPOUND_METABOLIC_PROCESS		43	-0.333652	-2.63008	0	0.00142675	0.112	6515	tags=79%, list=46%, signal=145%
GOBP_RIBOSE_PHOSPHATE_METABOLIC_PROCESS	GOBP_RIBOSE_PHOSPHATE_METABOLIC_PROCESS		323	-0.128327	-2.6223	0	0.00148671	0.119	6891	tags=61%, list=48%, signal=116%
GOBP_XENOBIOTIC_METABOLIC_PROCESS	GOBP_XENOBIOTIC_METABOLIC_PROCESS		114	-0.208394	-2.60421	0	0.00165695	0.135	2550	tags=39%, list=18%, signal=47%
GOBP_RIBOSE_PHOSPHATE_BIOSYNTHETIC_PROCESS	GOBP_RIBOSE_PHOSPHATE_BIOSYNTHETIC_PROCESS		140	-0.188213	-2.59615	0	0.00172347	0.142	6696	tags=66%, list=47%, signal=123%
GOBP_MUSCLE_SYSTEM_PROCESS	GOBP_MUSCLE_SYSTEM_PROCESS		405	-0.111505	-2.59347	0	0.00176613	0.146	4816	tags=45%, list=34%, signal=66%
GOBP_PROTEIN_RNA_COMPLEX_ORGANIZATION	GOBP_PROTEIN_RNA_COMPLEX_ORGANIZATION		170	-0.171136	-2.58671	0	0.0018398	0.153	9977	tags=87%, list=70%, signal=288%
GOBP_BENZENE_CONTAINING_COMPOUND_METABOLIC_PROCESS	GOBP_BENZENE_CONTAINING_COMPOUND_METABOLIC_PROCESS		29	-0.402179	-2.58474	0	0.00183641	0.155	5572	tags=79%, list=39%, signal=130%
GOBP_ATP_METABOLIC_PROCESS	GOBP_ATP_METABOLIC_PROCESS		201	-0.160015	-2.58421	0	0.00182261	0.156	6743	tags=63%, list=47%, signal=118%
GOBP_MITOCHONDRIAL_ELECTRON_TRANSPORT_NADH_TO_UBIQUINONE	GOBP_MITOCHONDRIAL_ELECTRON_TRANSPORT_NADH_TO_UBIQUINONE		24	-0.452132	-2.57876	0	0.00184019	0.159	6618	tags=92%, list=47%, signal=171%
GOBP_TYROSINE_METABOLIC_PROCESS	GOBP_TYROSINE_METABOLIC_PROCESS		15	-0.563415	-2.57651	0	0.0018572	0.163	4322	tags=87%, list=30%, signal=124%
GOBP_PROTEIN_TARGETING_TO_MITOCHONDRION	GOBP_PROTEIN_TARGETING_TO_MITOCHONDRION		70	-0.256918	-2.56545	0	0.00209878	0.186	7539	tags=79%, list=53%, signal=166%
GOBP_RENAL_SODIUM_ION_TRANSPORT	GOBP_RENAL_SODIUM_ION_TRANSPORT		15	-0.543841	-2.55668	0	0.00221197	0.198	3652	tags=80%, list=26%, signal=108%
GOBP_PROTON_TRANSMEMBRANE_TRANSPORT	GOBP_PROTON_TRANSMEMBRANE_TRANSPORT		109	-0.212151	-2.54836	0	0.00243183	0.218	5618	tags=61%, list=40%, signal=99%
GOBP_MONOCARBOXYLIC_ACID_CATABOLIC_PROCESS	GOBP_MONOCARBOXYLIC_ACID_CATABOLIC_PROCESS		123	-0.194411	-2.54337	0.00199203	0.00247987	0.224	6394	tags=64%, list=45%, signal=116%
GOBP_SARCOMERE_ORGANIZATION	GOBP_SARCOMERE_ORGANIZATION		53	-0.297026	-2.53707	0	0.00256657	0.234	4379	tags=60%, list=31%, signal=87%
GOBP_IMPORT_INTO_THE_MITOCHONDRION	GOBP_IMPORT_INTO_THE_MITOCHONDRION		45	-0.319327	-2.53454	0	0.00257451	0.237	6535	tags=78%, list=46%, signal=143%
GOBP_DEFENSE_RESPONSE_TO_GRAM_POSITIVE_BACTERIUM	GOBP_DEFENSE_RESPONSE_TO_GRAM_POSITIVE_BACTERIUM		105	-0.213576	-2.52325	0.00414938	0.00284593	0.262	2810	tags=41%, list=20%, signal=51%
GOBP_TETRAPYRROLE_METABOLIC_PROCESS	GOBP_TETRAPYRROLE_METABOLIC_PROCESS		53	-0.297772	-2.50974	0	0.00311191	0.287	6515	tags=75%, list=46%, signal=139%
GOBP_METALLO_SULFUR_CLUSTER_ASSEMBLY	GOBP_METALLO_SULFUR_CLUSTER_ASSEMBLY		21	-0.449467	-2.49291	0	0.00347402	0.317	5808	tags=86%, list=41%, signal=145%
GOBP_NADPH_REGENERATION	GOBP_NADPH_REGENERATION		23	-0.432235	-2.48086	0	0.00373448	0.335	3757	tags=70%, list=26%, signal=94%
GOBP_INNATE_IMMUNE_RESPONSE_IN_MUCOSA	GOBP_INNATE_IMMUNE_RESPONSE_IN_MUCOSA		17	-0.507314	-2.48071	0	0.00369204	0.335	3670	tags=76%, list=26%, signal=103%
GOBP_TETRAPYRROLE_BIOSYNTHETIC_PROCESS	GOBP_TETRAPYRROLE_BIOSYNTHETIC_PROCESS		27	-0.390277	-2.47536	0	0.00382149	0.349	7629	tags=93%, list=54%, signal=199%
GOBP_INTERMEDIATE_FILAMENT_ORGANIZATION	GOBP_INTERMEDIATE_FILAMENT_ORGANIZATION		60	-0.267601	-2.46877	0	0.00400848	0.364	3322	tags=50%, list=23%, signal=65%
GOBP_RESPONSE_TO_METAL_ION	GOBP_RESPONSE_TO_METAL_ION		347	-0.116571	-2.4645	0	0.00408699	0.373	4777	tags=45%, list=34%, signal=66%
GOBP_MITOCHONDRIAL_TRANSPORT	GOBP_MITOCHONDRIAL_TRANSPORT		154	-0.168491	-2.46429	0	0.00404257	0.373	7604	tags=70%, list=53%, signal=149%
GOBP_REGULATION_OF_LYMPHOCYTE_ACTIVATION	GOBP_REGULATION_OF_LYMPHOCYTE_ACTIVATION		481	-0.0960289	-2.42493	0	0.00530033	0.465	3619	tags=35%, list=25%, signal=45%
GOBP_TYPE_II_INTERFERON_PRODUCTION	GOBP_TYPE_II_INTERFERON_PRODUCTION		134	-0.178443	-2.42025	0	0.0054794	0.479	3112	tags=40%, list=22%, signal=50%
GOBP_ZYMOGEN_ACTIVATION	GOBP_ZYMOGEN_ACTIVATION		46	-0.302837	-2.40893	0	0.00589607	0.508	5292	tags=67%, list=37%, signal=107%
GOBP_RENAL_SYSTEM_PROCESS	GOBP_RENAL_SYSTEM_PROCESS		119	-0.187362	-2.40416	0	0.00607374	0.523	2617	tags=37%, list=18%, signal=45%
GOBP_HEME_BIOSYNTHETIC_PROCESS	GOBP_HEME_BIOSYNTHETIC_PROCESS		24	-0.411208	-2.40344	0.00407332	0.00602753	0.525	7199	tags=92%, list=51%, signal=185%
GOBP_CELL_KILLING	GOBP_CELL_KILLING		218	-0.142932	-2.40316	0	0.00598199	0.527	3153	tags=36%, list=22%, signal=46%
GOBP_NEGATIVE_REGULATION_OF_TYPE_II_INTERFERON_PRODUCTION	GOBP_NEGATIVE_REGULATION_OF_TYPE_II_INTERFERON_PRODUCTION		37	-0.323183	-2.40253	0	0.0059864	0.532	3104	tags=54%, list=22%, signal=69%
GOBP_CELLULAR_RESPONSE_TO_XENOBIOTIC_STIMULUS	GOBP_CELLULAR_RESPONSE_TO_XENOBIOTIC_STIMULUS		188	-0.153208	-2.40241	0	0.00592654	0.532	2314	tags=31%, list=16%, signal=37%
GOBP_SOMATIC_DIVERSIFICATION_OF_IMMUNE_RECEPTORS	GOBP_SOMATIC_DIVERSIFICATION_OF_IMMUNE_RECEPTORS		70	-0.247851	-2.40007	0	0.0060019	0.538	3401	tags=49%, list=24%, signal=64%
GOBP_RRNA_PROCESSING	GOBP_RRNA_PROCESSING		194	-0.148258	-2.39919	0	0.00597402	0.54	10603	tags=89%, list=75%, signal=346%
GOBP_B_CELL_ACTIVATION	GOBP_B_CELL_ACTIVATION		258	-0.124762	-2.38718	0	0.0064581	0.572	4708	tags=45%, list=33%, signal=67%
GOBP_B_CELL_PROLIFERATION	GOBP_B_CELL_PROLIFERATION		91	-0.214688	-2.38527	0	0.00648073	0.578	3531	tags=46%, list=25%, signal=61%
GOBP_BRANCHED_CHAIN_AMINO_ACID_METABOLIC_PROCESS	GOBP_BRANCHED_CHAIN_AMINO_ACID_METABOLIC_PROCESS		24	-0.397364	-2.37885	0	0.00672144	0.602	6803	tags=88%, list=48%, signal=167%
GOBP_ORGAN_OR_TISSUE_SPECIFIC_IMMUNE_RESPONSE	GOBP_ORGAN_OR_TISSUE_SPECIFIC_IMMUNE_RESPONSE		32	-0.354522	-2.3661	0.00205761	0.00731759	0.628	2970	tags=56%, list=21%, signal=71%
GOBP_GLUTAMINE_FAMILY_AMINO_ACID_METABOLIC_PROCESS	GOBP_GLUTAMINE_FAMILY_AMINO_ACID_METABOLIC_PROCESS		60	-0.259913	-2.36041	0	0.00762578	0.639	5327	tags=63%, list=37%, signal=101%
GOBP_POSITIVE_REGULATION_OF_HEART_RATE	GOBP_POSITIVE_REGULATION_OF_HEART_RATE		29	-0.371659	-2.35936	0.00196078	0.00760615	0.643	4534	tags=69%, list=32%, signal=101%
GOBP_PYRIDINE_NUCLEOTIDE_BIOSYNTHETIC_PROCESS	GOBP_PYRIDINE_NUCLEOTIDE_BIOSYNTHETIC_PROCESS		16	-0.479928	-2.34834	0.00201207	0.00816357	0.676	5627	tags=88%, list=40%, signal=145%
GOBP_REGULATION_OF_CALCIUM_ION_TRANSPORT	GOBP_REGULATION_OF_CALCIUM_ION_TRANSPORT		237	-0.131681	-2.34125	0.0019685	0.00839248	0.692	4220	tags=43%, list=30%, signal=60%
GOBP_STEROID_METABOLIC_PROCESS	GOBP_STEROID_METABOLIC_PROCESS		312	-0.111861	-2.33114	0	0.00892427	0.713	3778	tags=38%, list=27%, signal=50%
GOBP_RRNA_METABOLIC_PROCESS	GOBP_RRNA_METABOLIC_PROCESS		222	-0.134968	-2.32866	0.00204082	0.00902125	0.719	10603	tags=88%, list=75%, signal=340%
GOBP_RETINOL_METABOLIC_PROCESS	GOBP_RETINOL_METABOLIC_PROCESS		43	-0.292838	-2.31182	0	0.00999601	0.752	3125	tags=51%, list=22%, signal=65%
GOBP_FATTY_ACID_CATABOLIC_PROCESS	GOBP_FATTY_ACID_CATABOLIC_PROCESS		100	-0.194403	-2.31011	0	0.0100275	0.755	8206	tags=77%, list=58%, signal=181%
GOBP_ANTIBACTERIAL_HUMORAL_RESPONSE	GOBP_ANTIBACTERIAL_HUMORAL_RESPONSE		42	-0.303442	-2.30738	0	0.0101203	0.76	2809	tags=50%, list=20%, signal=62%
GOBP_RESPONSE_TO_XENOBIOTIC_STIMULUS	GOBP_RESPONSE_TO_XENOBIOTIC_STIMULUS		434	-0.0984214	-2.30561	0	0.0101701	0.762	2314	tags=26%, list=16%, signal=30%
GOBP_INORGANIC_ION_IMPORT_ACROSS_PLASMA_MEMBRANE	GOBP_INORGANIC_ION_IMPORT_ACROSS_PLASMA_MEMBRANE		107	-0.189586	-2.30097	0	0.0104088	0.773	1844	tags=32%, list=13%, signal=36%
GOBP_HEME_METABOLIC_PROCESS	GOBP_HEME_METABOLIC_PROCESS		36	-0.328011	-2.2938	0	0.01086	0.791	7199	tags=83%, list=51%, signal=168%
GOBP_LEUKOCYTE_MIGRATION	GOBP_LEUKOCYTE_MIGRATION		361	-0.104053	-2.29106	0	0.0110025	0.798	3483	tags=35%, list=24%, signal=45%
GOBP_LEUKOCYTE_PROLIFERATION	GOBP_LEUKOCYTE_PROLIFERATION		349	-0.107465	-2.29021	0	0.0109369	0.799	3074	tags=32%, list=22%, signal=40%
GOBP_MUSCLE_CONTRACTION	GOBP_MUSCLE_CONTRACTION		287	-0.117835	-2.27859	0	0.0117811	0.828	3661	tags=37%, list=26%, signal=49%
GOBP_PROTEIN_LIPID_COMPLEX_ORGANIZATION	GOBP_PROTEIN_LIPID_COMPLEX_ORGANIZATION		48	-0.277573	-2.27249	0	0.0122859	0.848	3770	tags=54%, list=27%, signal=73%
GOBP_DEOXYRIBONUCLEOTIDE_CATABOLIC_PROCESS	GOBP_DEOXYRIBONUCLEOTIDE_CATABOLIC_PROCESS		22	-0.408924	-2.26276	0.00195695	0.013104	0.867	2598	tags=59%, list=18%, signal=72%
GOBP_REGULATION_OF_TRANSMEMBRANE_TRANSPORT	GOBP_REGULATION_OF_TRANSMEMBRANE_TRANSPORT		419	-0.0965233	-2.26105	0	0.0131391	0.871	4235	tags=39%, list=30%, signal=54%
GOBP_BIOLOGICAL_PROCESS_INVOLVED_IN_INTERACTION_WITH_SYMBIONT	GOBP_BIOLOGICAL_PROCESS_INVOLVED_IN_INTERACTION_WITH_SYMBIONT		31	-0.351836	-2.26086	0.00208333	0.0130467	0.871	6477	tags=81%, list=46%, signal=148%
GOBP_MUSCLE_CELL_DEVELOPMENT	GOBP_MUSCLE_CELL_DEVELOPMENT		221	-0.132038	-2.25514	0	0.0134985	0.88	4716	tags=46%, list=33%, signal=68%
GOBP_REGULATION_OF_INTERLEUKIN_4_PRODUCTION	GOBP_REGULATION_OF_INTERLEUKIN_4_PRODUCTION		31	-0.336	-2.23643	0	0.0151977	0.913	4408	tags=65%, list=31%, signal=93%
GOBP_MONOCARBOXYLIC_ACID_BIOSYNTHETIC_PROCESS	GOBP_MONOCARBOXYLIC_ACID_BIOSYNTHETIC_PROCESS		213	-0.13135	-2.23297	0.00196078	0.0154199	0.92	5572	tags=52%, list=39%, signal=84%
GOBP_LEUKOCYTE_MEDIATED_IMMUNITY	GOBP_LEUKOCYTE_MEDIATED_IMMUNITY		393	-0.0972099	-2.22942	0.00197628	0.0157375	0.922	3180	tags=32%, list=22%, signal=40%
GOBP_PYRIDINE_CONTAINING_COMPOUND_METABOLIC_PROCESS	GOBP_PYRIDINE_CONTAINING_COMPOUND_METABOLIC_PROCESS		185	-0.140249	-2.22384	0.00200401	0.016106	0.93	3644	tags=39%, list=26%, signal=52%
GOBP_LEUKOCYTE_CELL_CELL_ADHESION	GOBP_LEUKOCYTE_CELL_CELL_ADHESION		393	-0.0994332	-2.2238	0	0.0159831	0.93	3294	tags=33%, list=23%, signal=42%
GOBP_PENTOSE_PHOSPHATE_SHUNT	GOBP_PENTOSE_PHOSPHATE_SHUNT		19	-0.420656	-2.21022	0.00396825	0.0173781	0.949	3757	tags=68%, list=26%, signal=93%
GOBP_NEUTROPHIL_MEDIATED_IMMUNITY	GOBP_NEUTROPHIL_MEDIATED_IMMUNITY		39	-0.299985	-2.20894	0.00785855	0.0174033	0.95	4498	tags=62%, list=32%, signal=90%
GOBP_POSITIVE_REGULATION_OF_T_CELL_PROLIFERATION	GOBP_POSITIVE_REGULATION_OF_T_CELL_PROLIFERATION		105	-0.181493	-2.19985	0.00208768	0.0183885	0.957	2992	tags=39%, list=21%, signal=49%
GOBP_INDOLALKYLAMINE_METABOLIC_PROCESS	GOBP_INDOLALKYLAMINE_METABOLIC_PROCESS		15	-0.462598	-2.19085	0.00210526	0.0192171	0.967	2910	tags=67%, list=20%, signal=84%
GOBP_POSITIVE_REGULATION_OF_LEUKOCYTE_PROLIFERATION	GOBP_POSITIVE_REGULATION_OF_LEUKOCYTE_PROLIFERATION		163	-0.148562	-2.18658	0	0.019579	0.969	3060	tags=36%, list=22%, signal=46%
GOBP_KERATINIZATION	GOBP_KERATINIZATION		46	-0.267337	-2.18009	0	0.0202437	0.975	3322	tags=50%, list=23%, signal=65%
GOBP_PIGMENT_METABOLIC_PROCESS	GOBP_PIGMENT_METABOLIC_PROCESS		64	-0.234072	-2.17968	0.00197239	0.0201546	0.976	7353	tags=75%, list=52%, signal=155%
GOBP_PROTEIN_IMPORT_INTO_MITOCHONDRIAL_MATRIX	GOBP_PROTEIN_IMPORT_INTO_MITOCHONDRIAL_MATRIX		17	-0.443392	-2.17907	0	0.0201067	0.976	6251	tags=88%, list=44%, signal=157%
GOBP_SERINE_FAMILY_AMINO_ACID_BIOSYNTHETIC_PROCESS	GOBP_SERINE_FAMILY_AMINO_ACID_BIOSYNTHETIC_PROCESS		15	-0.479164	-2.17169	0.004	0.0209038	0.98	7415	tags=100%, list=52%, signal=209%
GOBP_ACETYL_COA_BIOSYNTHETIC_PROCESS	GOBP_ACETYL_COA_BIOSYNTHETIC_PROCESS		20	-0.408408	-2.16836	0.002	0.0212397	0.981	5578	tags=80%, list=39%, signal=131%
GOBP_DEOXYRIBONUCLEOTIDE_METABOLIC_PROCESS	GOBP_DEOXYRIBONUCLEOTIDE_METABOLIC_PROCESS		44	-0.276483	-2.16819	0.00204082	0.0211346	0.981	3515	tags=52%, list=25%, signal=69%
GOBP_RIBOSOMAL_SMALL_SUBUNIT_BIOGENESIS	GOBP_RIBOSOMAL_SMALL_SUBUNIT_BIOGENESIS		95	-0.187302	-2.16393	0.00567108	0.0215713	0.982	10678	tags=94%, list=75%, signal=374%
GOBP_ORGANIC_ACID_TRANSPORT	GOBP_ORGANIC_ACID_TRANSPORT		326	-0.105019	-2.16352	0.00195312	0.0214826	0.982	3602	tags=36%, list=25%, signal=47%
GOBP_PROTEIN_LOCALIZATION_TO_MITOCHONDRION	GOBP_PROTEIN_LOCALIZATION_TO_MITOCHONDRION		95	-0.187876	-2.1635	0	0.0213345	0.982	7676	tags=73%, list=54%, signal=157%
GOBP_NAD_METABOLIC_PROCESS	GOBP_NAD_METABOLIC_PROCESS		36	-0.299591	-2.16057	0.00816326	0.0215581	0.984	5627	tags=69%, list=40%, signal=115%
GOBP_REGULATION_OF_B_CELL_MEDIATED_IMMUNITY	GOBP_REGULATION_OF_B_CELL_MEDIATED_IMMUNITY		56	-0.244021	-2.15735	0	0.0218377	0.984	3401	tags=48%, list=24%, signal=63%
GOBP_ACID_SECRETION	GOBP_ACID_SECRETION		42	-0.28275	-2.15004	0.00412371	0.0226304	0.987	1748	tags=40%, list=12%, signal=46%
GOBP_REGULATION_OF_HEART_RATE	GOBP_REGULATION_OF_HEART_RATE		100	-0.18253	-2.14714	0	0.0229064	0.988	4534	tags=50%, list=32%, signal=73%
GOBP_SULFUR_COMPOUND_METABOLIC_PROCESS	GOBP_SULFUR_COMPOUND_METABOLIC_PROCESS		323	-0.104728	-2.14379	0	0.0232403	0.988	5678	tags=50%, list=40%, signal=82%
GOBP_RESPONSE_TO_INTERLEUKIN_4	GOBP_RESPONSE_TO_INTERLEUKIN_4		38	-0.290806	-2.13856	0.00606061	0.0238074	0.988	2987	tags=50%, list=21%, signal=63%
GOBP_REGULATION_OF_LYMPHOCYTE_MEDIATED_IMMUNITY	GOBP_REGULATION_OF_LYMPHOCYTE_MEDIATED_IMMUNITY		184	-0.136925	-2.13845	0.00204499	0.0236561	0.988	3180	tags=36%, list=22%, signal=46%
GOBP_CELL_ACTIVATION_INVOLVED_IN_IMMUNE_RESPONSE	GOBP_CELL_ACTIVATION_INVOLVED_IN_IMMUNE_RESPONSE		286	-0.105623	-2.1316	0	0.0246448	0.989	4496	tags=42%, list=32%, signal=60%
GOBP_TRICARBOXYLIC_ACID_METABOLIC_PROCESS	GOBP_TRICARBOXYLIC_ACID_METABOLIC_PROCESS		16	-0.443347	-2.13158	0.00613497	0.0244899	0.989	4369	tags=75%, list=31%, signal=108%
GOBP_GRANULOCYTE_MIGRATION	GOBP_GRANULOCYTE_MIGRATION		147	-0.152551	-2.13011	0.0038835	0.0245932	0.989	3465	tags=39%, list=24%, signal=52%
GOBP_DIGESTION	GOBP_DIGESTION		115	-0.173593	-2.12384	0.00193424	0.0253866	0.991	3859	tags=44%, list=27%, signal=60%
GOBP_DEOXYRIBONUCLEOSIDE_MONOPHOSPHATE_METABOLIC_PROCESS	GOBP_DEOXYRIBONUCLEOSIDE_MONOPHOSPHATE_METABOLIC_PROCESS		30	-0.320243	-2.11701	0.00417537	0.0264465	0.994	3515	tags=57%, list=25%, signal=75%
GOBP_POTASSIUM_ION_IMPORT_ACROSS_PLASMA_MEMBRANE	GOBP_POTASSIUM_ION_IMPORT_ACROSS_PLASMA_MEMBRANE		40	-0.279383	-2.11653	0.00206186	0.0263644	0.994	2083	tags=43%, list=15%, signal=50%
GOBP_NEGATIVE_REGULATION_OF_POTASSIUM_ION_TRANSMEMBRANE_TRANSPORT	GOBP_NEGATIVE_REGULATION_OF_POTASSIUM_ION_TRANSMEMBRANE_TRANSPORT		23	-0.360633	-2.11171	0.0020202	0.0269684	0.995	3537	tags=61%, list=25%, signal=81%
GOBP_TERPENOID_METABOLIC_PROCESS	GOBP_TERPENOID_METABOLIC_PROCESS		82	-0.198959	-2.10991	0.00195695	0.0271334	0.996	2911	tags=40%, list=20%, signal=50%
GOBP_REGULATION_OF_IMMUNE_EFFECTOR_PROCESS	GOBP_REGULATION_OF_IMMUNE_EFFECTOR_PROCESS		394	-0.0923299	-2.10815	0	0.0272364	0.996	3200	tags=31%, list=23%, signal=39%
GOBP_MITOCHONDRIAL_TRANSMEMBRANE_TRANSPORT	GOBP_MITOCHONDRIAL_TRANSMEMBRANE_TRANSPORT		82	-0.199209	-2.10666	0.00406504	0.0273581	0.997	7590	tags=73%, list=53%, signal=156%
GOBP_PYRIMIDINE_DEOXYRIBONUCLEOTIDE_METABOLIC_PROCESS	GOBP_PYRIMIDINE_DEOXYRIBONUCLEOTIDE_METABOLIC_PROCESS		23	-0.362182	-2.10521	0.00193424	0.0275361	0.997	3515	tags=61%, list=25%, signal=81%
GOBP_PIGMENT_BIOSYNTHETIC_PROCESS	GOBP_PIGMENT_BIOSYNTHETIC_PROCESS		45	-0.261624	-2.10514	0	0.0273682	0.997	7353	tags=78%, list=52%, signal=161%
GOBP_ALCOHOL_METABOLIC_PROCESS	GOBP_ALCOHOL_METABOLIC_PROCESS		329	-0.10183	-2.10399	0	0.0274185	0.997	3125	tags=32%, list=22%, signal=40%
GOBP_REGULATION_OF_B_CELL_ACTIVATION	GOBP_REGULATION_OF_B_CELL_ACTIVATION		128	-0.161384	-2.1037	0.00201207	0.0273065	0.997	3615	tags=41%, list=25%, signal=55%
GOBP_POSITIVE_REGULATION_OF_CELL_CELL_ADHESION	GOBP_POSITIVE_REGULATION_OF_CELL_CELL_ADHESION		308	-0.101099	-2.10109	0.0019685	0.0275335	0.998	3581	tags=35%, list=25%, signal=46%
GOBP_CELL_CHEMOTAXIS	GOBP_CELL_CHEMOTAXIS		292	-0.106656	-2.101	0.00614754	0.0273841	0.998	3483	tags=35%, list=24%, signal=45%
GOBP_NEGATIVE_REGULATION_OF_LYMPHOCYTE_APOPTOTIC_PROCESS	GOBP_NEGATIVE_REGULATION_OF_LYMPHOCYTE_APOPTOTIC_PROCESS		44	-0.262517	-2.10031	0.00753296	0.0272923	0.998	3713	tags=52%, list=26%, signal=71%
GOBP_IMMUNE_SYSTEM_DEVELOPMENT	GOBP_IMMUNE_SYSTEM_DEVELOPMENT		201	-0.12654	-2.09795	0.00197628	0.0274993	0.998	3604	tags=38%, list=25%, signal=50%
GOBP_PYRIMIDINE_DEOXYRIBONUCLEOSIDE_MONOPHOSPHATE_METABOLIC_PROCESS	GOBP_PYRIMIDINE_DEOXYRIBONUCLEOSIDE_MONOPHOSPHATE_METABOLIC_PROCESS		18	-0.420099	-2.09474	0.00808081	0.0279385	0.998	3515	tags=67%, list=25%, signal=88%
GOBP_STEROL_HOMEOSTASIS	GOBP_STEROL_HOMEOSTASIS		97	-0.179493	-2.08985	0.00393701	0.0285975	0.999	3770	tags=44%, list=27%, signal=60%
GOBP_CARDIAC_MUSCLE_CELL_CONTRACTION	GOBP_CARDIAC_MUSCLE_CELL_CONTRACTION		70	-0.208535	-2.08552	0.00423729	0.0291938	0.999	4770	tags=54%, list=34%, signal=81%
GOBP_POTASSIUM_ION_HOMEOSTASIS	GOBP_POTASSIUM_ION_HOMEOSTASIS		33	-0.299493	-2.08248	0.00197628	0.0294863	0.999	1354	tags=39%, list=10%, signal=43%
GOBP_T_CELL_SELECTION	GOBP_T_CELL_SELECTION		63	-0.223807	-2.07683	0.00626305	0.0303125	0.999	6313	tags=67%, list=44%, signal=119%
GOBP_ATTACHMENT_OF_SPINDLE_MICROTUBULES_TO_KINETOCHORE	GOBP_ATTACHMENT_OF_SPINDLE_MICROTUBULES_TO_KINETOCHORE		40	-0.272029	-2.07062	0.00847458	0.0313693	0.999	5387	tags=65%, list=38%, signal=104%
GOBP_REGULATION_OF_T_CELL_ACTIVATION	GOBP_REGULATION_OF_T_CELL_ACTIVATION		365	-0.094145	-2.06569	0	0.0321318	0.999	3294	tags=32%, list=23%, signal=41%
GOBP_IMMUNE_RESPONSE_TO_TUMOR_CELL	GOBP_IMMUNE_RESPONSE_TO_TUMOR_CELL		33	-0.303208	-2.06454	0.00381679	0.0321782	0.999	3456	tags=55%, list=24%, signal=72%
GOBP_POSITIVE_T_CELL_SELECTION	GOBP_POSITIVE_T_CELL_SELECTION		48	-0.250958	-2.06334	0	0.0322245	0.999	8295	tags=83%, list=58%, signal=199%
GOBP_INTERLEUKIN_4_PRODUCTION	GOBP_INTERLEUKIN_4_PRODUCTION		39	-0.280619	-2.0525	0.0101833	0.0343595	0.999	4408	tags=59%, list=31%, signal=85%
GOBP_REGULATION_OF_IMMUNOGLOBULIN_PRODUCTION	GOBP_REGULATION_OF_IMMUNOGLOBULIN_PRODUCTION		73	-0.204882	-2.05209	0.0040568	0.0342314	0.999	3531	tags=45%, list=25%, signal=60%
GOBP_MODIFIED_AMINO_ACID_METABOLIC_PROCESS	GOBP_MODIFIED_AMINO_ACID_METABOLIC_PROCESS		184	-0.124305	-2.05168	0.0019802	0.0341173	0.999	3589	tags=38%, list=25%, signal=50%
GOBP_POSITIVE_REGULATION_OF_MONOATOMIC_ION_TRANSPORT	GOBP_POSITIVE_REGULATION_OF_MONOATOMIC_ION_TRANSPORT		213	-0.119171	-2.04977	0.00585938	0.0343392	0.999	4207	tags=41%, list=30%, signal=58%
GOBP_LIPID_CATABOLIC_PROCESS	GOBP_LIPID_CATABOLIC_PROCESS		309	-0.101089	-2.04838	0.00616016	0.0343987	0.999	3381	tags=34%, list=24%, signal=43%
GOBP_TELOMERE_MAINTENANCE_VIA_TELOMERE_LENGTHENING	GOBP_TELOMERE_MAINTENANCE_VIA_TELOMERE_LENGTHENING		73	-0.203665	-2.04802	0.00401606	0.0342516	0.999	7834	tags=75%, list=55%, signal=167%
GOBP_POSITIVE_REGULATION_OF_INTERLEUKIN_4_PRODUCTION	GOBP_POSITIVE_REGULATION_OF_INTERLEUKIN_4_PRODUCTION		25	-0.343601	-2.04641	0.00393701	0.0343497	0.999	3087	tags=56%, list=22%, signal=71%
GOBP_AMIDE_CATABOLIC_PROCESS	GOBP_AMIDE_CATABOLIC_PROCESS		19	-0.397879	-2.04156	0.00601202	0.0352031	0.999	3332	tags=63%, list=23%, signal=82%
GOBP_POSITIVE_REGULATION_OF_CYTOSOLIC_CALCIUM_ION_CONCENTRATION	GOBP_POSITIVE_REGULATION_OF_CYTOSOLIC_CALCIUM_ION_CONCENTRATION		158	-0.14246	-2.0393	0.004	0.0354719	1	3848	tags=41%, list=27%, signal=56%
GOBP_T_CELL_PROLIFERATION	GOBP_T_CELL_PROLIFERATION		228	-0.114697	-2.03792	0.00585938	0.0355744	1	3074	tags=33%, list=22%, signal=41%
GOBP_REGULATION_OF_B_CELL_DIFFERENTIATION	GOBP_REGULATION_OF_B_CELL_DIFFERENTIATION		37	-0.285299	-2.0377	0.0059761	0.0354289	1	3257	tags=51%, list=23%, signal=66%
GOBP_ISOTYPE_SWITCHING_TO_IGG_ISOTYPES	GOBP_ISOTYPE_SWITCHING_TO_IGG_ISOTYPES		17	-0.408464	-2.03604	0.00959693	0.0355938	1	3401	tags=65%, list=24%, signal=85%
GOBP_LEUKOCYTE_CHEMOTAXIS	GOBP_LEUKOCYTE_CHEMOTAXIS		213	-0.118427	-2.03423	0.00380228	0.035735	1	3483	tags=36%, list=24%, signal=47%
GOBP_DTMP_METABOLIC_PROCESS	GOBP_DTMP_METABOLIC_PROCESS		15	-0.433474	-2.03221	0.00210084	0.0359946	1	7116	tags=93%, list=50%, signal=187%
GOBP_KILLING_BY_HOST_OF_SYMBIONT_CELLS	GOBP_KILLING_BY_HOST_OF_SYMBIONT_CELLS		25	-0.345224	-2.02909	0.00609756	0.03646	1	6477	tags=80%, list=46%, signal=147%
GOBP_NEGATIVE_REGULATION_OF_MONOATOMIC_ION_TRANSPORT	GOBP_NEGATIVE_REGULATION_OF_MONOATOMIC_ION_TRANSPORT		110	-0.168689	-2.02511	0	0.0370876	1	4214	tags=46%, list=30%, signal=65%
GOBP_REGULATION_OF_CALCIUM_ION_TRANSMEMBRANE_TRANSPORT	GOBP_REGULATION_OF_CALCIUM_ION_TRANSMEMBRANE_TRANSPORT		162	-0.136985	-2.0223	0.00397614	0.037538	1	4220	tags=43%, list=30%, signal=61%
GOBP_CELLULAR_OXIDANT_DETOXIFICATION	GOBP_CELLULAR_OXIDANT_DETOXIFICATION		68	-0.20654	-2.02189	0.00595238	0.0374403	1	5234	tags=57%, list=37%, signal=90%
GOBP_NEUTROPHIL_MIGRATION	GOBP_NEUTROPHIL_MIGRATION		110	-0.166798	-2.01963	0.00390625	0.0376728	1	3465	tags=41%, list=24%, signal=54%
GOBP_SOMATIC_DIVERSIFICATION_OF_IMMUNOGLOBULINS_INVOLVED_IN_IMMUNE_RESPONSE	GOBP_SOMATIC_DIVERSIFICATION_OF_IMMUNOGLOBULINS_INVOLVED_IN_IMMUNE_RESPONSE		47	-0.251109	-2.01808	0	0.0378666	1	3401	tags=49%, list=24%, signal=64%
GOBP_RESPIRATORY_BURST	GOBP_RESPIRATORY_BURST		28	-0.324443	-2.01748	0.00199601	0.0377805	1	983	tags=39%, list=7%, signal=42%
GOBP_FIBRINOLYSIS	GOBP_FIBRINOLYSIS		22	-0.361287	-2.0123	0.00390625	0.0387441	1	2628	tags=55%, list=18%, signal=67%
GOBP_POSITIVE_REGULATION_OF_LYASE_ACTIVITY	GOBP_POSITIVE_REGULATION_OF_LYASE_ACTIVITY		19	-0.381114	-2.01171	0.00804829	0.0387411	1	6564	tags=84%, list=46%, signal=156%
GOBP_POSITIVE_REGULATION_OF_BLOOD_PRESSURE	GOBP_POSITIVE_REGULATION_OF_BLOOD_PRESSURE		47	-0.245122	-2.01153	0.0116054	0.0386243	1	4091	tags=53%, list=29%, signal=74%
GOBP_SUPEROXIDE_ANION_GENERATION	GOBP_SUPEROXIDE_ANION_GENERATION		44	-0.258243	-2.01138	0.00199203	0.0384817	1	4420	tags=57%, list=31%, signal=82%
GOBP_STRIATED_MUSCLE_CONTRACTION	GOBP_STRIATED_MUSCLE_CONTRACTION		162	-0.133039	-2.01031	0.00402414	0.0385305	1	3661	tags=39%, list=26%, signal=52%
GOBP_LYMPHOCYTE_ACTIVATION_INVOLVED_IN_IMMUNE_RESPONSE	GOBP_LYMPHOCYTE_ACTIVATION_INVOLVED_IN_IMMUNE_RESPONSE		197	-0.121405	-2.00728	0.00202429	0.0390461	1	4290	tags=42%, list=30%, signal=59%
GOBP_CARDIAC_CELL_DEVELOPMENT	GOBP_CARDIAC_CELL_DEVELOPMENT		113	-0.160163	-2.00701	0.0038835	0.0389228	1	4789	tags=50%, list=34%, signal=74%
GOBP_INTERLEUKIN_12_PRODUCTION	GOBP_INTERLEUKIN_12_PRODUCTION		64	-0.210267	-2.00397	0.00357143	0.0394991	1	7690	tags=75%, list=54%, signal=163%
GOBP_LEUKOCYTE_APOPTOTIC_PROCESS	GOBP_LEUKOCYTE_APOPTOTIC_PROCESS		130	-0.149146	-2.001	0.0140562	0.0400243	1	3369	tags=38%, list=24%, signal=50%
GOBP_REGULATION_OF_ISOTYPE_SWITCHING	GOBP_REGULATION_OF_ISOTYPE_SWITCHING		29	-0.31328	-1.99969	0.00420168	0.0401065	1	3401	tags=55%, list=24%, signal=72%
GOBP_RIBOSOME_ASSEMBLY	GOBP_RIBOSOME_ASSEMBLY		53	-0.238576	-1.99917	0.0142566	0.0400256	1	7622	tags=77%, list=54%, signal=166%
GOBP_IMMUNOGLOBULIN_PRODUCTION	GOBP_IMMUNOGLOBULIN_PRODUCTION		119	-0.162264	-1.99808	0.0019802	0.0401061	1	4883	tags=50%, list=34%, signal=76%
GOBP_SOMATIC_DIVERSIFICATION_OF_IMMUNOGLOBULINS	GOBP_SOMATIC_DIVERSIFICATION_OF_IMMUNOGLOBULINS		60	-0.211811	-1.99683	0.00201207	0.0401488	1	3401	tags=45%, list=24%, signal=59%
GOBP_ICOSANOID_METABOLIC_PROCESS	GOBP_ICOSANOID_METABOLIC_PROCESS		136	-0.146052	-1.99679	0.00982318	0.0399648	1	3695	tags=40%, list=26%, signal=54%
GOBP_THIOESTER_BIOSYNTHETIC_PROCESS	GOBP_THIOESTER_BIOSYNTHETIC_PROCESS		35	-0.287857	-1.9957	0.00635593	0.0400784	1	5669	tags=69%, list=40%, signal=114%
GOBP_ALDEHYDE_BIOSYNTHETIC_PROCESS	GOBP_ALDEHYDE_BIOSYNTHETIC_PROCESS		25	-0.341299	-1.99467	0.00412371	0.0400918	1	1982	tags=48%, list=14%, signal=56%
GOBP_BILE_ACID_BIOSYNTHETIC_PROCESS	GOBP_BILE_ACID_BIOSYNTHETIC_PROCESS		27	-0.32419	-1.98863	0.00417537	0.0413092	1	3300	tags=56%, list=23%, signal=72%
GOBP_ONE_CARBON_COMPOUND_TRANSPORT	GOBP_ONE_CARBON_COMPOUND_TRANSPORT		23	-0.340039	-1.98616	0.0108932	0.0417277	1	5066	tags=70%, list=36%, signal=108%
GOBP_MUSCLE_ADAPTATION	GOBP_MUSCLE_ADAPTATION		135	-0.148683	-1.98318	0.00576923	0.0422603	1	7598	tags=68%, list=53%, signal=145%
GOBP_REGULATION_OF_ATTACHMENT_OF_SPINDLE_MICROTUBULES_TO_KINETOCHORE	GOBP_REGULATION_OF_ATTACHMENT_OF_SPINDLE_MICROTUBULES_TO_KINETOCHORE		20	-0.371787	-1.98251	0	0.04222	1	5387	tags=75%, list=38%, signal=121%
GOBP_CELLULAR_COMPONENT_ASSEMBLY_INVOLVED_IN_MORPHOGENESIS	GOBP_CELLULAR_COMPONENT_ASSEMBLY_INVOLVED_IN_MORPHOGENESIS		130	-0.147338	-1.97726	0.00206186	0.0433459	1	4379	tags=45%, list=31%, signal=65%
GOBP_SUPEROXIDE_METABOLIC_PROCESS	GOBP_SUPEROXIDE_METABOLIC_PROCESS		70	-0.201022	-1.97659	0.0059761	0.0433475	1	4470	tags=51%, list=31%, signal=75%
GOBP_NEGATIVE_REGULATION_OF_POTASSIUM_ION_TRANSPORT	GOBP_NEGATIVE_REGULATION_OF_POTASSIUM_ION_TRANSPORT		29	-0.303697	-1.97545	0.00603622	0.043446	1	3537	tags=55%, list=25%, signal=73%
GOBP_POSITIVE_REGULATION_OF_IMMUNE_EFFECTOR_PROCESS	GOBP_POSITIVE_REGULATION_OF_IMMUNE_EFFECTOR_PROCESS		254	-0.107826	-1.97499	0	0.0433519	1	3198	tags=33%, list=22%, signal=42%
GOBP_REGULATION_OF_LEUKOCYTE_MEDIATED_IMMUNITY	GOBP_REGULATION_OF_LEUKOCYTE_MEDIATED_IMMUNITY		247	-0.106238	-1.9738	0.01002	0.0434164	1	3180	tags=33%, list=22%, signal=42%
GOBP_T_CELL_DIFFERENTIATION_INVOLVED_IN_IMMUNE_RESPONSE	GOBP_T_CELL_DIFFERENTIATION_INVOLVED_IN_IMMUNE_RESPONSE		90	-0.177801	-1.96609	0.00198413	0.0452052	1	4599	tags=50%, list=32%, signal=73%
GOBP_NEGATIVE_REGULATION_OF_LYMPHOCYTE_ACTIVATION	GOBP_NEGATIVE_REGULATION_OF_LYMPHOCYTE_ACTIVATION		170	-0.127077	-1.95873	0.00986193	0.0471324	1	2900	tags=33%, list=20%, signal=41%
GOBP_POSITIVE_REGULATION_OF_IMMUNOGLOBULIN_PRODUCTION	GOBP_POSITIVE_REGULATION_OF_IMMUNOGLOBULIN_PRODUCTION		51	-0.232338	-1.95846	0.00416667	0.0470055	1	3401	tags=47%, list=24%, signal=62%
GOBP_POSITIVE_REGULATION_OF_ADENYLATE_CYCLASE_ACTIVITY	GOBP_POSITIVE_REGULATION_OF_ADENYLATE_CYCLASE_ACTIVITY		15	-0.419325	-1.95755	0.00399202	0.0470288	1	7317	tags=93%, list=51%, signal=192%
GOBP_REGULATION_OF_LYMPHOCYTE_APOPTOTIC_PROCESS	GOBP_REGULATION_OF_LYMPHOCYTE_APOPTOTIC_PROCESS		72	-0.19464	-1.95749	0.00604839	0.0468385	1	3765	tags=46%, list=26%, signal=62%
GOBP_REGULATION_OF_SODIUM_ION_TRANSMEMBRANE_TRANSPORT	GOBP_REGULATION_OF_SODIUM_ION_TRANSMEMBRANE_TRANSPORT		48	-0.241641	-1.95617	0.00798403	0.0469755	1	3983	tags=52%, list=28%, signal=72%
GOBP_CALCIUM_MEDIATED_SIGNALING	GOBP_CALCIUM_MEDIATED_SIGNALING		205	-0.120499	-1.9549	0.00383877	0.0471357	1	3723	tags=38%, list=26%, signal=51%
GOBP_NEUTRAL_LIPID_CATABOLIC_PROCESS	GOBP_NEUTRAL_LIPID_CATABOLIC_PROCESS		41	-0.256493	-1.95456	0.0139721	0.0470221	1	3301	tags=49%, list=23%, signal=63%
GOBP_NON_PROTEINOGENIC_AMINO_ACID_CATABOLIC_PROCESS	GOBP_NON_PROTEINOGENIC_AMINO_ACID_CATABOLIC_PROCESS		16	-0.397928	-1.95207	0.0111111	0.0474409	1	5903	tags=81%, list=42%, signal=139%
GOBP_ARGININE_METABOLIC_PROCESS	GOBP_ARGININE_METABOLIC_PROCESS		19	-0.362918	-1.94866	0.00813008	0.0481833	1	4577	tags=68%, list=32%, signal=101%
GOBP_REGULATION_OF_SYSTEMIC_ARTERIAL_BLOOD_PRESSURE_MEDIATED_BY_A_CHEMICAL_SIGNAL	GOBP_REGULATION_OF_SYSTEMIC_ARTERIAL_BLOOD_PRESSURE_MEDIATED_BY_A_CHEMICAL_SIGNAL		50	-0.23123	-1.94808	0.00631579	0.0481813	1	4688	tags=56%, list=33%, signal=83%
GOBP_PROTEIN_CONTAINING_COMPLEX_REMODELING	GOBP_PROTEIN_CONTAINING_COMPLEX_REMODELING		31	-0.291023	-1.94048	0.00585938	0.0501719	1	3670	tags=55%, list=26%, signal=74%
GOBP_INTERLEUKIN_5_PRODUCTION	GOBP_INTERLEUKIN_5_PRODUCTION		17	-0.387343	-1.94034	0.0078125	0.049998	1	3701	tags=65%, list=26%, signal=87%
GOBP_B_CELL_ACTIVATION_INVOLVED_IN_IMMUNE_RESPONSE	GOBP_B_CELL_ACTIVATION_INVOLVED_IN_IMMUNE_RESPONSE		83	-0.180407	-1.94005	0.00188679	0.049872	1	8416	tags=77%, list=59%, signal=188%
GOBP_PEPTIDE_CROSS_LINKING	GOBP_PEPTIDE_CROSS_LINKING		20	-0.367699	-1.93991	0.00196078	0.0497137	1	4734	tags=70%, list=33%, signal=105%
GOBP_LEUKOCYTE_MIGRATION_INVOLVED_IN_INFLAMMATORY_RESPONSE	GOBP_LEUKOCYTE_MIGRATION_INVOLVED_IN_INFLAMMATORY_RESPONSE		26	-0.309353	-1.93957	0.0100806	0.0496192	1	6002	tags=73%, list=42%, signal=126%
GOBP_POSITIVE_REGULATION_OF_CELL_ACTIVATION	GOBP_POSITIVE_REGULATION_OF_CELL_ACTIVATION		357	-0.0879621	-1.93754	0.0121212	0.0499591	1	3721	tags=35%, list=26%, signal=46%
GOBP_V_D_J_RECOMBINATION	GOBP_V_D_J_RECOMBINATION		18	-0.378492	-1.93746	0.00570342	0.0497698	1	4896	tags=72%, list=34%, signal=110%
[truncated: 1,379 more rows]

## Sheet: table S5
NAME	GS<br> follow link to MSigDB	GS DETAILS	SIZE	ES	NES	NOM p-val	FDR q-val	FWER p-val	RANK AT MAX	LEADING EDGE
[truncated: 1,762 more rows]

## Sheet: table S6
NAME	GS<br> follow link to MSigDB	GS DETAILS	SIZE	ES	NES	NOM p-val	FDR q-val	FWER p-val	RANK AT MAX	LEADING EDGE
[truncated: 2,368 more rows]

[truncated: 18 more sheets: table S7, table S8, table S9, table S10, table S11, table S12, table S13, table S14, table S15, table S16, table S17, table S18, table S19, table S20, table S21, table S22, table S23, table S24]
