# Supplementary material for: Prenatal Life is the Predominant Source of Somatic Mosaicism Across Tissues and Aging
Source: Research Square preprint supplement (doi:10.21203/rs.3.rs-8663812/v1), 2026-02-04
Supplement: Supplementary file 3 [file fae287d0af4c702fef8e5d57.docx]

**Supplementary Materials:**Fetal Life is the Predominant Source of Somatic Mosaicism Across Tissues and Aging

Sierra Lore1,2, Zane Koch3, Björn Schumacher4,5, Trey Ideker3, Morten Scheibye-Knudsen2*, Eric Verdin1*

*Corresponding author(s). Email: mscheibye@sund.ku.dk, everdin@buckinstitute.org.

**Supplementary Tables:**

Supplementary Table 1: Cell-type tissue-type germ layer mappings in mice.

Supplementary Table 2: Cell-type tissue-type germ layer mappings in humans.

Supplementary Table 3: Positive GSEA results across all tissues in mice.

Supplementary Table 4: Negative GSEA results across all tissues in mice.

Supplementary Table 5: Positive GSEA results across all tissues in humans.

Supplementary Table 6: Negative GSEA results across all tissues in humans.

Supplementary Table 7: Enrichment maps clusters of positive GO terms in mice.

Supplementary Table 8: Enrichment maps clusters of negative GO terms in mice.

Supplementary Table 9: Enrichment maps clusters of positive GO terms in humans.

Supplementary Table 10: Enrichment maps clusters of negative GO terms in humans.

Supplementary Table 11: Merged cell-type- tissue-type-specific GSEA results in mice.

Supplementary Table 12: Merged cell-type- tissue-type-specific GSEA results in humans.

Supplementary Table 13: Concordant averaged GO terms upregulated in mice and humans.

Supplementary Table 14: Enrichment map clusters of concordant upregulated GO terms in mice and humans.

Supplementary Table 15: Concordant averaged GO terms downregulated in mice and humans.

Supplementary Table 16: Enrichment map clusters of concordant downregulated GO terms in mice and humans.

Supplementary Table 17: Nonconcordant GO terms upregulated in mice.

Supplementary Table 18: Enrichment map clusters of nonconcordant upregulated GO terms in mice.

Supplementary Table 19: Nonconcordant GO terms downregulated in mice.

Supplementary Table 20: Enrichment map clusters of nonconcordant downregulated GO terms in mice.

Supplementary Table 21: Nonconcordant GO terms upregulated in humans.

Supplementary Table 22: Enrichment map clusters of nonconcordant upregulated GO terms in humans.

Supplementary Table 23: Nonconcordant GO terms downregulated in humans.

Supplementary Table 24: Enrichment map clusters of nonconcordant downregulated GO terms in humans.

**Supplementary HTML Files:**

Supplementary HTML 1: Cell-type–specific clonality cumulative distribution function for mice.

Supplementary HTML 2: Cell-type–specific clonality cumulative distribution function for humans.
